# Supplementary material for: TALEN-Based HvMPK3 Knock-Out Attenuates Proteome and Root Hair Phenotypic Responses to flg22 in Barley
Source: Front Plant Sci. 2021 Apr 29;12:666229. doi: 10.3389/fpls.2021.666229 (PMC8117018; doi:10.3389/fpls.2021.666229)
Supplement: Supplementary Data Sheet 1 — Differentially regulated proteins found between roots of wild type and HvMPK3 KO lines and their bioinformatic evaluation. [file Data_Sheet_1.xlsx]

## Sheet: Datasheet 1A_List
Data sheet 1A. Summary of differentialy regulated proteins found between roots of untreated WT and HvMPK3 KO lines.
Accession	MW [kDa]	calc. pI	Description	Ratio (MPK3 KO vs wild type)	P-value	Mean (HvMPK3 KO)	Variance (HvMPK3 KO)	Mean (wild type)	Variance (wild type)
			Defence response
326496709	36.7	8.06	Name:"Similar to PER12 Peroxidase 12 (Arabidopsis thaliana OX=3702)"	0.231821	0.0072352	837054	1.60738e+11	3.61078e+06	3.23796e+11
326502638	34.1	9.39	Name:"Similar to PER52 Peroxidase 52 (Arabidopsis thaliana OX=3702)"	0.645601	0.022978	5.69587e+06	1.94256e+12	8.82259e+06	3.33979e+11
326495784	35.5	7.9	Name:"Similar to PER12 Peroxidase 12 (Arabidopsis thaliana OX=3702)"	0.505841	0.021824	1.80083e+06	4.72147e+11	3.56007e+06	2.25899e+11
326494942	34.8	6.55	Name:"Similar to PER35 Peroxidase 35 (Arabidopsis thaliana OX=3702)"	0.446939	0.041921	87772.2	6.26626e+08	196385	2.38305e+09
326529001	38.6	6.32	Name:"Similar to Sb03g046810 Cationic peroxidase SPC4 (Sorghum bicolor OX=4558)"	4.23931	0.0026587	1.75843e+06	3.51921e+10	414790	2.02267e+10
326489434	44.7	5.67	Name:"Similar to CLP Chitinase CLP (Oryza sativa subsp. japonica OX=39947)"	0.236704	0.0143841	102738	1.02387e+09	434034	1.81966e+10
326508800	32	5.48	Name:"Similar to Chitinase 2 (Tulipa saxatilis subsp. bakeri OX=110455)"	0.494984	0.033701	676620	1.09541e+11	1.36695e+06	3.22986e+10
112821174	22.9	6.38	Name:"Similar to 23 kDa jasmonate-induced protein (Hordeum vulgare OX=4513)"	1.52684	0.031804	1.35046e+07	3.97286e+12	8.84481e+06	2.24959e+12
326529301	18.7	9.11	Name:"Similar to PRMS Pathogenesis-related protein PRMS (Zea mays OX=4577)"	3.16712	0.050781	1.50876e+06	1.88214e+11	476384	7.25905e+09
14164983	24.3	7.56	thaumatin-like protein TLP8 [Hordeum vulgare]	Unique in WT	NA	0	0	251691	8.58626e+09
326506728	14.5	5.81	Name:"Similar to THI2 Thionin (Brassica rapa subsp. pekinensis OX=51351)"	Unique in WT	NA	0	0	1.93413e+06	2.27184e+12
326491885	36.1	6.43	Name:"Similar to RACK1A Guanine nucleotide-binding protein subunit beta-like protein A (Oryza sativa subsp. japonica OX=39947)"	1.54726	0.0121987	1.70444e+06	4.12207e+10	1.10158e+06	1.6511e+10
326502418	43.1	5.66	Name:"Similar to OLE9 Glucan endo-1,3-beta-D-glucosidase (Olea europaea OX=4146)"	Unique in HvMPK3 KO	NA	161381	1.0266e+10	0	0
			Metabolism
326492375	40.7	6.32	Name:"Similar to OPR5 Putative 12-oxophytodienoate reductase 5 (Oryza sativa subsp. japonica OX=39947)"	0.298421	0.022797	484613	2.59747e+10	1.62392e+06	2.74783e+11
326508098	27	5.12	Name:"Similar to IPI1 Isopentenyl-diphosphate Delta-isomerase I (Camptotheca acuminata OX=16922)"	0.410703	0.0117017	392190	2.35624e+10	954924	2.5538e+10
296520443	33.2	9.1	Name:"Similar to gbkr1 3-oxoacyl-[acyl-carrier-protein] reductase 1, chloroplastic (Brassica napus OX=3708)"	0.411351	0.003197	137016	2.02165e+09	333089	8.59667e+08
326494042	47.9	9.11	Name:"Similar to UXS4 UDP-glucuronic acid decarboxylase 4 (Arabidopsis thaliana OX=3702)"	0.427641	0.037839	1.59022e+06	4.58534e+11	3.71858e+06	3.70147e+11
209405432	63	5.83	NADP-dependent malic enzyme [Hordeum vulgare]	0.449627	0.037639	885521	1.33888e+11	1.96946e+06	2.42404e+11
326524486	40.6	7.08	Name:"Similar to yqjG Glutathionyl-hydroquinone reductase YqjG (Escherichia coli (strain K12) OX=83333)"	0.457687	0.026116	405047	4.57077e+10	884986	1.24314e+10
417356961	38.8	6.06	glutamine synthetase isoform GS1_2 [Hordeum vulgare]	0.468056	0.038658	850114	2.47406e+11	1.81627e+06	5.69515e+10
326487968	40.8	6.61	Name:"Similar to NCS1 S-norcoclaurine synthase 1 (Coptis japonica OX=3442)"	0.521918	0.0090428	488327	1.0697e+10	935639	1.60343e+10
296510409	33.8	8.73	Name:"Similar to CBR2 NADH-cytochrome b5 reductase-like protein (Arabidopsis thaliana OX=3702)"	0.530243	0.017341	825408	5.77228e+10	1.55666e+06	4.70179e+10
326504620	21.9	9.45	Name:"Similar to DUT Deoxyuridine 5'-triphosphate nucleotidohydrolase (Oryza sativa subsp. japonica OX=39947)"	0.557728	0.031682	443935	1.25473e+10	795970	2.28763e+10
326506682	49	7.49	Name:"Similar to At5g10770 Aspartyl protease family protein At5g10770 (Arabidopsis thaliana OX=3702)"	0.570428	0.00171811	1.37298e+06	2.31246e+10	2.40692e+06	3.43423e+10
326513012	46.3	6.3	Name:"Similar to tal1 Transaldolase 1 (Streptomyces avermitilis (strain ATCC 31267 / DSM 46492 / JCM 5070 / NBRC 14893 / NCIMB 12804 / NRRL 8165 / MA-4680) OX=227882)"	0.586505	0.047961	3.17918e+06	9.98398e+11	5.42055e+06	9.00477e+11
326495130	106.9	7.24	Name:"Similar to Os08g0191100 Putative aconitate hydratase, cytoplasmic (Oryza sativa subsp. japonica OX=39947)"	0.621648	0.050218	1.68601e+06	1.28397e+11	2.71216e+06	2.82642e+11
326533014	54.2	7.2	Name:"Similar to DAHPS2 Phospho-2-dehydro-3-deoxyheptonate aldolase 2, chloroplastic (Oryza sativa subsp. japonica OX=39947)"	0.645011	0.02718	2.11577e+06	1.43151e+11	3.2802e+06	2.07919e+11
326518378	53.2	5.92	Name:"Similar to SAHH Adenosylhomocysteinase (Triticum aestivum OX=4565)"	0.657735	0.022597	9.08083e+06	2961928310644	1.38062e+07	2.18372e+12
326518642	72.4	5.25	Name:"Similar to 1-SST Sucrose:sucrose 1-fructosyltransferase (Festuca arundinacea OX=4606)"	1.52239	0.043435	1.77452e+06	8.96989e+10	1.16561e+06	4.11422e+10
326500102	19.6	6.62	Name:"Similar to At3g52300 ATP synthase subunit d, mitochondrial (Arabidopsis thaliana OX=3702)"	1.54471	0.053141	6.05889e+06	2.36399e+11	3.92236e+06	1.61841e+12
326506572	39.7	7.2	Name:"Similar to IDH5 Isocitrate dehydrogenase [NAD] catalytic subunit 5, mitochondrial (Arabidopsis thaliana OX=3702)"	1.61235	0.0120368	467331	3.99162e+09	289845	9.72843e+08
112807100	35.1	6.93	deoxymugineic acid synthase1 [Hordeum vulgare]	1.75992	0.028823	308751	2.5302e+09	175434	7.78872e+08
326526075	71.9	5.01	Name:"Similar to 1-SST Sucrose:sucrose 1-fructosyltransferase (Festuca arundinacea OX=4606)"	1.7678	0.044898	1.20538e+06	5.22383e+10	681851	4.67155e+10
326523069	63.8	6.89	Name:"Similar to LAC15 Laccase-15 (Oryza sativa subsp. japonica OX=39947)"	1.83091	0.027178	737196	2.0564e+10	402638	8.41502e+09
326502492	112.8	6.3	Name:"Similar to At3g26720 Alpha-mannosidase At3g26720 (Arabidopsis thaliana OX=3702)"	1.86043	0.03442	712769	2.67475e+10	383121	6.04876e+09
326494248	42.8	5.49	Name:"Similar to tal Transaldolase (Haemophilus somnus (strain 129Pt) OX=205914)"	2.30201	0.022198	828483	3.68199e+10	359896	1.32204e+10
326500906	58.6	8.7	Name:"Similar to 4CLL4 4-coumarate--CoA ligase-like 4 (Oryza sativa subsp. japonica OX=39947)"	2.40384	0.038401	559829	7.53134e+07	232889	8.63233e+09
326496411	57.5	6.95	Name:"Similar to Os11g0148500 Pyruvate kinase 1, cytosolic (Oryza sativa subsp. japonica OX=39947)"	2.4535	0.029819	533284	9.27837e+08	217357	5.30162e+09
326534286	86.6	9.07	Name:"Similar to ACX1 Peroxisomal acyl-coenzyme A oxidase 1 (Arabidopsis thaliana OX=3702)"	Unique in WT	NA	0	0	304871	2.94121e+10
326531376	11.5	8.59	Name:"Similar to MZM1 Mitochondrial zinc maintenance protein 1, mitochondrial (Phaeosphaeria nodorum (strain SN15 / ATCC MYA-4574 / FGSC 10173) OX=321614)"	0.605641	0.0130804	99734.3	9.0744e+07	164676	2.17925e+07
326498217	13.9	5.88	Name:"Similar to MTACP2 Acyl carrier protein 2, mitochondrial (Arabidopsis thaliana OX=3702)"	1.80879	0.0041195	1.29511e+06	1.53441e+08	716010	2.62643e+09
506383	49.5	6.86	glutamate 1-semialdehyde aminotransferase [Hordeum vulgare]	0.20976	0.0016591	118642	1.48942e+09	565605	9.05589e+09
326525020	60.6	5.95	Name:"Similar to ALAAT2 Alanine aminotransferase 2, mitochondrial (Arabidopsis thaliana OX=3702)"	0.325815	0.00145506	300249	5.95115e+09	921533	1.30309e+10
326510053	48.2	6.8	Name:"Similar to AG118 Acetylornithine aminotransferase, mitochondrial (Alnus glutinosa OX=3517)"	0.459408	0.035918	151050	1.36097e+09	328793	1.03682e+09
301508493	43.3	7.03	methionine aminopeptiase [Hordeum vulgare]	1.61077	0.0118551	1.97132e+06	8.2788e+10	1.22383e+06	4.47893e+09
14522834	23.4	5.39	IDI1 [Hordeum vulgare]	0.268817	0.029679	272026	1.64229e+10	1.01194e+06	1.33564e+11
			Unknown
326496431	23.7	4.46	Name:"Similar to OsI_027940 Uncharacterized protein OsI_027940 (Oryza sativa subsp. indica OX=39946)"	1.98376	0.0111	4.78258e+06	3.52522e+11	2.41087e+06	4.93158e+11
326496663	33.5	8.7	Name:"Similar to ywbO Uncharacterized protein YwbO (Bacillus subtilis (strain 168) OX=224308)"	2.34314	0.0484	246848	2.98085e+09	105349	9.68661e+08
326492075	14.6	5.06	Name:"Similar to At2g34160 Uncharacterized protein At2g34160 (Arabidopsis thaliana OX=3702)"	2.55833	0.00181575	2.54136e+06	6.01777e+10	993368	7.23775e+10
326517577	15.3	5.12	Name:"Similar to At5g01610 Uncharacterized protein At5g01610 (Arabidopsis thaliana OX=3702)"	Unique in WT	NA	0	0	546767	8.74035e+09
326491865	66.2	8.32	Name:"Similar to tmem214-a Transmembrane protein 214-A (Xenopus laevis OX=8355)"	0.479995	0.044459	208690	3.80526e+09	434776	1.06165e+09
326500096	50.5	9.33	Name:"Similar to MYH3 Myosin-3 (Homo sapiens OX=9606)"	2.07826	0.042937	1.08669e+06	5.63488e+10	522885	2.1763e+10
218401700	42.9	6.8	Name:"Similar to Myg1 UPF0160 protein MYG1, mitochondrial (Mus musculus OX=10090)"	Unique in HvMPK3 KO	NA	314966	3.41554e+10	0	0
			Epigeneic control
326514920	27.4	10.74	Name:"Similar to Histone H1 (Solanum pennellii OX=28526)"	0.628399	0.0128816	331586	7.97887e+08	527668	5.50898e+09
326517613	14	10.23	Name:"Similar to Os07g0545400 Probable histone H2A.2 (Oryza sativa subsp. japonica OX=39947)"	Unique in KO	NA	1.04823e+07	1.07084e+13	0	0
326502258	30.9	6.71	Name:"Similar to ALKBH2 DNA oxidative demethylase ALKBH2 (Arabidopsis thaliana OX=3702)"	0.311962	0.034763	273279	2.14318e+10	876002	5.37249e+10
			Translation
326492474	24.4	9.94	Name:"Similar to RPL10A 60S ribosomal protein L10a (Oryza sativa subsp. japonica OX=39947)"	1.60237	0.0175816	739653	3.71703e+08	461600	2.42058e+09
326495694	21.3	10.35	Name:"Similar to RPL18A 60S ribosomal protein L18a (Oryza sativa subsp. japonica OX=39947)"	1.63508	0.023941	292579	7.70953e+08	178939	2.31489e+09
326500550	7.6	12.12	Name:"Similar to RPS30A 40S ribosomal protein S30 (Arabidopsis thaliana OX=3702)"	2.08145	0.025061	3.03934e+06	1.13881e+11	1.46021e+06	4.99366e+11
326514326	41.3	9.07	Name:"Similar to PAT1 Anthranilate phosphoribosyltransferase, chloroplastic (Arabidopsis thaliana OX=3702)"	2.10499	0.02128	220380	5.83e+08	104694	5.289e+06
12229949	15.3	5.53	RecName: Full=40S ribosomal protein S12	2.37723	0.033021	1.11865e+06	7.01075e+10	470570	5.3238e+10
1710521	18.4	10.64	RecName: Full=60S ribosomal protein L24	3.09203	0.0067176	1.61933e+06	4.4735e+10	523712	9.07119e+10
326523135	24.7	10.21	Name:"Similar to RPL6 60S ribosomal protein L6 (Mesembryanthemum crystallinum OX=3544)"	Unique in HvMPK3 KO	NA	2.08783e+06	5.93796e+11	0	0
326511136	47.3	6.46	Name:"Similar to ychF Ribosome-binding ATPase YchF (Bacillus subtilis (strain 168) OX=224308)"	Unique in HvMPK3 KO	NA	108346	1.52224e+09	0	0
326525859	66.5	9.2	Name:"Similar to CBF5 H/ACA ribonucleoprotein complex subunit 4 (Arabidopsis thaliana OX=3702)"	3.35369	0.0172231	568452	2.27778e+10	169501	1.05526e+09
326510499	48.8	5.39	Name:"Similar to EIF5 Eukaryotic translation initiation factor 5 (Zea mays OX=4577)"	Unique in HvMPK3 KO	NA	170882	5.61877e+09	0	0
326498091	63.3	5.91	Name:"Similar to SYNC1 Asparagine--tRNA ligase, cytoplasmic 1 (Arabidopsis thaliana OX=3702)"	0.465664	0.0181415	467715	3.0953e+10	1.0044e+06	2.70344e+10
326521310	38.7	9.69	Name:"Similar to Rpp25l Ribonuclease P protein subunit p25-like protein (Mus musculus OX=10090)"	0.616821	0.037741	464295	1.12569e+10	752722	1.07791e+09
326506132	71.1	5.19	Name:"Similar to MED37E Probable mediator of RNA polymerase II transcription subunit 37e (Arabidopsis thaliana OX=3702)"	0.644118	0.0057611	9.05501e+06	1.60435e+12	1.4058e+07	9.88305e+11
326508890	31.7	5.36	Name:"Similar to At1g09760 U2 small nuclear ribonucleoprotein A' (Arabidopsis thaliana OX=3702)"	1.6673	0.033095	1.24283e+06	1.24795e+10	745413	6.02807e+10
			Stress response
326498153	38.6	7.34	Name:"Similar to ANN3 Annexin D3 (Arabidopsis thaliana OX=3702)"	0.321379	0.021298	375176	5.3351e+10	1.16739e+06	8.60561e+10
326491825	22.6	7.91	Name:"Similar to GER4 Germin-like protein 1-1 (Oryza sativa subsp. japonica OX=39947)"	0.344052	0.0078352	320037	4.17624e+10	930197	4.05039e+09
326513786	17.9	5.36	Name:"Similar to Desiccation protectant protein Lea14 homolog (Glycine max OX=3847)"	0.402433	0.0122247	253884	2.79825e+09	630873	1.98122e+10
257659938	24.8	5.48	Name:"Similar to GSTF11 Glutathione S-transferase F11 (Arabidopsis thaliana OX=3702)"	0.587872	0.028281	992111	4.57984e+10	1.68763e+06	8.26834e+10
326532030	24.9	6.21	Name:"Similar to GSTF1 Probable glutathione S-transferase GSTF1 (Oryza sativa subsp. japonica OX=39947)"	0.662681	0.04724	3.94338e+06	1.35576e+12	5.95066e+06	1.51169e+11
326489251	39.9	9.14	Name:"Similar to ANN4 Annexin D4 (Arabidopsis thaliana OX=3702)"	Unique in HvMPK3 KO	NA	671485	2.50827e+11	0	0
326517587	35.2	7.14	Name:"Similar to ATJ10 Chaperone protein dnaJ 10 (Arabidopsis thaliana OX=3702)"	1.77197	0.007641	618661	5.76344e+09	349138	3.05308e+09
326517050	32.6	5.82	Name:"Similar to SRC2 Protein SRC2 homolog (Arabidopsis thaliana OX=3702)"	0.505676	0.037876	458046	5.73414e+10	905809	7.13827e+09
			Protein degradation
326531894	17.3	6.57	Name:"Similar to UBC36 Ubiquitin-conjugating enzyme E2 36 (Arabidopsis thaliana OX=3702)"	1.52984	0.052116	613978	1.21478e+10	401335	5.9714e+09
326492540	125.3	6.38	Name:"Similar to RPN9B 26S proteasome non-ATPase regulatory subunit 13 homolog B (Arabidopsis thaliana OX=3702)"	1.74701	0.04646	59429.3	6.37524e+07	34017.8	706886
326493278	17.1	7.34	Name:"Similar to UBC36 Ubiquitin-conjugating enzyme E2 36 (Arabidopsis thaliana OX=3702)"	1.76343	0.0036793	928315	1.19388e+08	526426	4.17186e+09
326528657	44.8	5.29	Name:"Similar to Os01g0377700 NPL4-like protein (Oryza sativa subsp. japonica OX=39947)"	Unique in HvMPK3 KO	NA	426273	1.63468e+10	0	0
			Membrane transport
326507174	99.2	5.1	Name:"Similar to BETAC-AD Beta-adaptin-like protein C (Arabidopsis thaliana OX=3702)"	0.173777	0.009238	79699.5	1.28813e+09	458631	1.40144e+09
326494930	122.7	5.06	Name:"Similar to SEC31B Protein transport protein SEC31 homolog B (Arabidopsis thaliana OX=3702)"	0.32134	0.0187638	206881	1.28265e+10	643807	2.64072e+10
326502724	32.5	5.07	Name:"Similar to Alpha-soluble NSF attachment protein (Solanum tuberosum OX=4113)"	0.535271	0.039518	510008	3.55809e+10	952803	2.93027e+10
			Other functions
326488325	55.2	4.94	Name:"Similar to FLK Flowering locus K homology domain (Arabidopsis thaliana OX=3702)"	0.341668	0.026739	114296	2.06106e+09	334525	1.03663e+10
326494308	35.8	4.82	Name:"Similar to 11S globulin seed storage protein 2 (Sesamum indicum OX=4182)"	0.480579	0.025204	5.76739e+06	5.08984e+12	1.20009e+07	4.50109e+12
326499406	71.2	5.21	Name:"Similar to HSP70 Heat shock cognate 70 kDa protein (Petunia hybrida OX=4102)"	0.539664	0.028402	5.6666e+06	1.29156e+12	1.05002e+07	4.93108e+12
326505854	59.9	6.19	Name:"Similar to VLN2 Villin-2 (Oryza sativa subsp. japonica OX=39947)"	0.555075	0.048018	244491	1.01552e+10	440464	4.37298e+09
326511567	7.9	5.45	Name:"Similar to Subtilisin-chymotrypsin inhibitor-2A (Hordeum vulgare OX=4513)"	0.613909	0.0059587	1.29614e+06	3.8789e+10	2.11129e+06	3.13288e+10
326509917	36.5	6.81	Name:"Similar to KOB1 Probable voltage-gated potassium channel subunit beta (Oryza sativa subsp. japonica OX=39947)"	0.625502	0.045845	929826	9.55302e+10	1.48653e+06	1.79989e+10
326513540	58.5	6.49	Name:"Similar to At3g02090 Probable mitochondrial-processing peptidase subunit beta, mitochondrial (Arabidopsis thaliana OX=3702)"	1.59725	0.0189579	4.97472e+06	3.29357e+11	3.11455e+06	3.86124e+11
326513747	32.1	5.5	Name:"Similar to surE 5'-nucleotidase SurE (Sulfurihydrogenibium sp. (strain YO3AOP1) OX=436114)"	1.67809	0.050122	539426	1.00446e+10	321453	3.43888e+09
326528601	58.8	5.66	Name:"Similar to T-complex protein 1 subunit epsilon (Avena sativa OX=4498)"	1.79033	0.025436	874284	4.46371e+09	488337	1.33398e+10
326533446	32.4	7.77	Name:"Similar to GLY3 Persulfide dioxygenase ETHE1 homolog, mitochondrial (Arabidopsis thaliana OX=3702)"	2.01602	0.0142178	675864	4.61979e+09	335247	1.55522e+10
326498983	152.1	4.51	Name:"Similar to TOC159 Translocase of chloroplast 159, chloroplastic (Arabidopsis thaliana OX=3702)"	2.09251	0.045238	539818	1.83157e+10	257977	1.05131e+10
326523461	22.8	5.27	Name:"Similar to AHSA2 Activator of 90 kDa heat shock protein ATPase homolog 2 (Bos taurus OX=9913)"	Unique in HvMPK3 KO	NA	159938	2.2897e+10	0	0

## Sheet: Datasheet 1B_GO_BP 
Data sheet 1B. Gene ontology annotation of differentialy regulated proteins found between roots of untreated WT and HvMPK3 KO lines according to biological process.
Level	GO ID	GO Name	GO Type	Parents (ACC)	Parents (Name)	Nodescore	#Seqs	#downregulated	#upregulated	Sequence Names
1	GO:0008150	biological process	Biological Process			93.9	63	36	27	BAJ95922.1, BAJ86838.1, BAK06364.1, BAJ94667.1, BAK02020.1, BAJ98381.1, AFX60876.1, BAJ99821.1, BAF03162.1, BAJ89493.1, BAJ96150.1, BAJ91382.1, BAJ85988.1, BAJ87892.1, BAJ95309.1, BAJ85566.1, BAK01698.1, BAJ98536.1, CBM35779.1, BAJ93106.1, sp|P50888.1|RL24_HORVU, BAK06601.1, BAK07780.1, BAJ85560.1, BAJ91327.1, BAJ90886.1, BAJ88218.1, BAJ93214.1, BAJ87243.1, BAJ88350.1, BAJ98990.1, BAJ86792.1, BAJ…
2	GO:0008152	metabolic process	Biological Process	GO:0008150	biological_process	87.5	52	26	26	BAJ95922.1, BAJ86838.1, BAK06364.1, BAJ94667.1, BAK02020.1, BAJ98381.1, AFX60876.1, BAF03162.1, BAJ89493.1, BAJ96150.1, BAJ91382.1, BAJ85988.1, BAJ95309.1, BAJ87892.1, BAJ85566.1, BAK01698.1, BAJ98536.1, CBM35779.1, BAJ93106.1, sp|P50888.1|RL24_HORVU, BAK06601.1, BAK07780.1, BAJ91327.1, BAJ90886.1, BAJ93214.1, BAJ88218.1, BAJ88350.1, BAJ87243.1, BAJ86792.1, BAJ98947.1, BAK01971.1, BAJ89352.1, BAJ…
2	GO:0009987	cellular process	Biological Process	GO:0008150	biological_process	54.16	48	27	21	BAJ86792.1, BAJ86838.1, BAJ98947.1, BAK06364.1, BAJ94667.1, BAK02020.1, BAJ91166.1, BAJ98381.1, AFX60876.1, BAJ89352.1, BAJ98137.1, BAJ87174.1, sp|Q9XHS0.1|RS12_HORVU, BAJ88608.1, BAJ99821.1, BAF03162.1, BAJ89493.1, BAJ88575.1, BAJ96150.1, BAJ91928.1, BAJ94908.1, BAK00894.1, AAB59330.1, BAJ85988.1, BAK03413.1, BAJ87892.1, BAJ85566.1, BAJ86014.1, BAJ98536.1, CBM35779.1, BAJ93482.1, BAJ93106.1, sp|…
3	GO:0044238	primary metabolic process	Biological Process	GO:0008152	metabolic process	20.54	29	10	19	BAJ95922.1, BAJ86792.1, BAJ86838.1, BAK06364.1, BAJ94667.1, BAK02020.1, sp|Q9XHS0.1|RS12_HORVU, BAJ88608.1, BAJ89493.1, BAJ95272.1, BAJ91928.1, BAJ94908.1, BAJ91382.1, BAK03413.1, BAJ95309.1, BAK01698.1, BAJ98536.1, CBM35779.1, BAJ93106.1, BAJ87789.1, sp|P50888.1|RL24_HORVU, BAK06601.1, BAJ98167.1, BAJ90393.1, BAJ90886.1, BAK03725.1, BAJ93214.1, BAJ85943.1, BAJ88350.1
3	GO:0071704	organic substance metabolic process	Biological Process	GO:0008152	metabolic process	16.03	29	10	19	BAJ95922.1, BAJ86792.1, BAJ86838.1, BAK06364.1, BAJ94667.1, BAK02020.1, sp|Q9XHS0.1|RS12_HORVU, BAJ88608.1, BAJ89493.1, BAJ95272.1, BAJ91928.1, BAJ94908.1, BAJ91382.1, BAK03413.1, BAJ95309.1, BAK01698.1, BAJ98536.1, CBM35779.1, BAJ93106.1, sp|P50888.1|RL24_HORVU, BAJ87789.1, BAK06601.1, BAJ98167.1, BAJ90393.1, BAJ90886.1, BAK03725.1, BAJ93214.1, BAJ85943.1, BAJ88350.1
3	GO:0009058	biosynthetic process	Biological Process	GO:0008152	metabolic process	23.73	22	10	12	BAJ86792.1, BAJ94908.1, BAK06364.1, BAK02020.1, AAB59330.1, AFX60876.1, BAK03413.1, BAJ89352.1, BAJ98536.1, CBM35779.1, sp|Q9XHS0.1|RS12_HORVU, sp|P50888.1|RL24_HORVU, BAJ98167.1, BAK06601.1, BAK07780.1, BAJ88608.1, BAJ90886.1, BAK03725.1, BAF03162.1, BAJ85943.1, BAB61039.1, BAJ96150.1
3	GO:0006807	nitrogen compound metabolic process	Biological Process	GO:0008152	metabolic process	8.01	18	5	13	BAJ94908.1, BAJ86838.1, BAK06364.1, BAJ91382.1, BAJ94667.1, BAK02020.1, BAK01698.1, BAJ93106.1, sp|Q9XHS0.1|RS12_HORVU, sp|P50888.1|RL24_HORVU, BAJ87789.1, BAK06601.1, BAJ98167.1, BAJ88608.1, BAJ90886.1, BAK03725.1, BAJ85943.1, BAJ91928.1
3	GO:0044237	cellular metabolic process	Biological Process	GO:0009987, GO:0008152	cellular process, metabolic process	6.86	17	3	14	BAJ94908.1, BAJ86838.1, BAK06364.1, BAJ94667.1, BAK02020.1, BAK03413.1, BAJ93106.1, sp|Q9XHS0.1|RS12_HORVU, sp|P50888.1|RL24_HORVU, BAK06601.1, BAJ98167.1, BAJ88608.1, BAJ91327.1, BAJ90393.1, BAJ90886.1, BAK03725.1, BAJ85943.1
2	GO:0050896	response to stimulus	Biological Process	GO:0008150	biological_process	16.2	14	10	4	BAJ86838.1, BAJ98947.1, BAK00894.1, BAJ91405.1, BAJ98381.1, BAJ85988.1, BAK03413.1, BAJ85566.1, BAJ86014.1, BAJ87911.1, BAJ98167.1, BAJ91305.1, BAF03162.1, BAJ91928.1
4	GO:0034641	cellular nitrogen compound metabolic process	Biological Process	GO:0044237, GO:0006807	cellular metabolic process, nitrogen compound metabolic process	5.24	14	2	12	BAJ94908.1, BAJ86838.1, BAK06364.1, BAJ94667.1, BAK02020.1, BAJ93106.1, sp|Q9XHS0.1|RS12_HORVU, sp|P50888.1|RL24_HORVU, BAK06601.1, BAJ98167.1, BAJ88608.1, BAJ90886.1, BAK03725.1, BAJ85943.1
3	GO:0006950	response to stress	Biological Process	GO:0050896	response to stimulus	13	13	9	4	BAJ98947.1, BAJ86838.1, BAK00894.1, BAJ91405.1, BAJ98381.1, BAJ85988.1, BAJ85566.1, BAJ86014.1, BAJ87911.1, BAJ98167.1, BAJ91305.1, BAF03162.1, BAJ91928.1
4	GO:0043170	macromolecule metabolic process	Biological Process	GO:0071704	organic substance metabolic process	10.51	13	4	9	BAJ94908.1, BAK06364.1, BAJ91382.1, BAK02020.1, BAK01698.1, sp|Q9XHS0.1|RS12_HORVU, sp|P50888.1|RL24_HORVU, BAJ87789.1, BAJ98167.1, BAJ88608.1, BAK03725.1, BAJ85943.1, BAJ91928.1
4	GO:1901564	organonitrogen compound metabolic process	Biological Process	GO:0006807, GO:0071704	nitrogen compound metabolic process, organic substance metabolic process	9.14	12	4	8	BAJ94908.1, BAK06364.1, BAJ91382.1, BAK02020.1, BAK01698.1, sp|Q9XHS0.1|RS12_HORVU, sp|P50888.1|RL24_HORVU, BAJ87789.1, BAJ98167.1, BAJ88608.1, BAJ85943.1, BAJ91928.1
4	GO:0019538	protein metabolic process	Biological Process	GO:0044238, GO:1901564, GO:0043170	primary metabolic process, organonitrogen compound metabolic process, macromolecule metabolic process	15.24	12	4	8	BAJ94908.1, BAK06364.1, BAJ91382.1, BAK02020.1, BAJ88608.1, BAK01698.1, BAJ85943.1, sp|Q9XHS0.1|RS12_HORVU, sp|P50888.1|RL24_HORVU, BAJ91928.1, BAJ87789.1, BAJ98167.1
3	GO:0009056	catabolic process	Biological Process	GO:0008152	metabolic process	10	10	7	3	BAK07780.1, BAJ98947.1, BAK00894.1, BAJ94667.1, BAJ98381.1, BAJ85988.1, BAJ85566.1, BAJ89493.1, BAJ88575.1, BAK06601.1
3	GO:0042221	response to chemical	Biological Process	GO:0050896	response to stimulus	9	9	8	1	BAJ98947.1, BAK00894.1, BAJ98381.1, BAJ91305.1, BAJ85988.1, BAK03413.1, BAJ85566.1, BAJ86014.1, BAJ87911.1
5	GO:0010467	gene expression	Biological Process	GO:0043170	macromolecule metabolic process	5.16	9	1	8	BAJ94908.1, BAK06364.1, BAK02020.1, BAJ88608.1, BAK03725.1, BAJ85943.1, sp|Q9XHS0.1|RS12_HORVU, sp|P50888.1|RL24_HORVU, BAJ98167.1
4	GO:0044249	cellular biosynthetic process	Biological Process	GO:0044237, GO:0009058	cellular metabolic process, biosynthetic process	2.88	8	1	7	BAJ94908.1, BAK06364.1, BAK02020.1, BAJ88608.1, BAJ85943.1, sp|Q9XHS0.1|RS12_HORVU, sp|P50888.1|RL24_HORVU, BAJ98167.1
4	GO:0005975	carbohydrate metabolic process	Biological Process	GO:0044238, GO:0071704	primary metabolic process, organic substance metabolic process	8	8	1	7	BAJ95922.1, BAJ94667.1, BAJ90393.1, BAK03413.1, BAJ95309.1, BAJ93214.1, BAJ88350.1, BAJ95272.1
4	GO:1901576	organic substance biosynthetic process	Biological Process	GO:0071704, GO:0009058	organic substance metabolic process, biosynthetic process	1.73	8	1	7	BAJ94908.1, BAK06364.1, BAK02020.1, BAJ88608.1, BAJ85943.1, sp|Q9XHS0.1|RS12_HORVU, sp|P50888.1|RL24_HORVU, BAJ98167.1
4	GO:0044260	cellular macromolecule metabolic process	Biological Process	GO:0044237, GO:0043170	cellular metabolic process, macromolecule metabolic process	3.24	8	1	7	BAJ94908.1, BAK06364.1, BAK02020.1, BAJ88608.1, BAJ85943.1, sp|Q9XHS0.1|RS12_HORVU, sp|P50888.1|RL24_HORVU, BAJ98167.1
5	GO:0034645	cellular macromolecule biosynthetic process	Biological Process	GO:0009059, GO:0044249, GO:0044260	macromolecule biosynthetic process, cellular biosynthetic process, cellular macromolecule metabolic process	4.8	8	1	7	BAJ94908.1, BAK06364.1, BAK02020.1, BAJ88608.1, BAJ85943.1, sp|Q9XHS0.1|RS12_HORVU, sp|P50888.1|RL24_HORVU, BAJ98167.1
5	GO:0044267	cellular protein metabolic process	Biological Process	GO:0019538, GO:0044260	protein metabolic process, cellular macromolecule metabolic process	5.4	8	1	7	BAJ94908.1, BAK06364.1, BAK02020.1, BAJ88608.1, BAJ85943.1, sp|Q9XHS0.1|RS12_HORVU, sp|P50888.1|RL24_HORVU, BAJ98167.1
5	GO:1901566	organonitrogen compound biosynthetic process	Biological Process	GO:1901576, GO:1901564	organic substance biosynthetic process, organonitrogen compound metabolic process	2.88	8	1	7	BAJ94908.1, BAK06364.1, BAK02020.1, BAJ88608.1, BAJ85943.1, sp|Q9XHS0.1|RS12_HORVU, sp|P50888.1|RL24_HORVU, BAJ98167.1
5	GO:0044271	cellular nitrogen compound biosynthetic process	Biological Process	GO:0034641, GO:0044249	cellular nitrogen compound metabolic process, cellular biosynthetic process	1.73	8	1	7	BAJ94908.1, BAK06364.1, BAK02020.1, BAJ88608.1, BAJ85943.1, sp|Q9XHS0.1|RS12_HORVU, sp|P50888.1|RL24_HORVU, BAJ98167.1
5	GO:0043603	cellular amide metabolic process	Biological Process	GO:0034641	cellular nitrogen compound metabolic process	1.73	8	1	7	BAJ94908.1, BAK06364.1, BAK02020.1, BAJ88608.1, BAJ85943.1, sp|Q9XHS0.1|RS12_HORVU, sp|P50888.1|RL24_HORVU, BAJ98167.1
5	GO:0009059	macromolecule biosynthetic process	Biological Process	GO:1901576, GO:0043170	organic substance biosynthetic process, macromolecule metabolic process	2.88	8	1	7	BAJ94908.1, BAK06364.1, BAK02020.1, BAJ88608.1, BAJ85943.1, sp|Q9XHS0.1|RS12_HORVU, sp|P50888.1|RL24_HORVU, BAJ98167.1
5	GO:0006518	peptide metabolic process	Biological Process	GO:1901564, GO:0043603	organonitrogen compound metabolic process, cellular amide metabolic process	2.88	8	1	7	BAJ94908.1, BAK06364.1, BAK02020.1, BAJ88608.1, BAJ85943.1, sp|Q9XHS0.1|RS12_HORVU, sp|P50888.1|RL24_HORVU, BAJ98167.1
6	GO:0006412	translation	Biological Process	GO:0010467, GO:0034645, GO:0044267, GO:0043043	gene expression, cellular macromolecule biosynthetic process, cellular protein metabolic process, peptide biosynthetic process	8	8	1	7	BAJ94908.1, BAK06364.1, BAK02020.1, BAJ88608.1, BAJ85943.1, sp|Q9XHS0.1|RS12_HORVU, sp|P50888.1|RL24_HORVU, BAJ98167.1
6	GO:0043043	peptide biosynthetic process	Biological Process	GO:0043604, GO:0006518, GO:1901566	amide biosynthetic process, peptide metabolic process, organonitrogen compound biosynthetic process	4.8	8	1	7	BAJ94908.1, BAK06364.1, BAK02020.1, BAJ88608.1, BAJ85943.1, sp|Q9XHS0.1|RS12_HORVU, sp|P50888.1|RL24_HORVU, BAJ98167.1
6	GO:0043604	amide biosynthetic process	Biological Process	GO:0043603, GO:0044271	cellular amide metabolic process, cellular nitrogen compound biosynthetic process	2.88	8	1	7	BAJ94908.1, BAK06364.1, BAK02020.1, BAJ88608.1, BAJ85943.1, sp|Q9XHS0.1|RS12_HORVU, sp|P50888.1|RL24_HORVU, BAJ98167.1
4	GO:0006139	nucleobase-containing compound metabolic process	Biological Process	GO:0034641, GO:0044238, GO:1901360, GO:0006725, GO:0046483	cellular nitrogen compound metabolic process, primary metabolic process, organic cyclic compound metabolic process, cellular aromatic compound metabolic process, heterocycle metabolic process	7	7	2	5	BAJ94908.1, BAJ86838.1, BAJ94667.1, BAJ90886.1, BAK03725.1, BAJ93106.1, BAK06601.1
4	GO:0006725	cellular aromatic compound metabolic process	Biological Process	GO:0044237	cellular metabolic process	4.2	7	2	5	BAJ94908.1, BAJ86838.1, BAJ94667.1, BAJ90886.1, BAK03725.1, BAJ93106.1, BAK06601.1
4	GO:0046483	heterocycle metabolic process	Biological Process	GO:0044237	cellular metabolic process	4.2	7	2	5	BAJ94908.1, BAJ86838.1, BAJ94667.1, BAJ90886.1, BAK03725.1, BAJ93106.1, BAK06601.1
4	GO:1901360	organic cyclic compound metabolic process	Biological Process	GO:0071704	organic substance metabolic process	4.2	7	2	5	BAJ94908.1, BAJ86838.1, BAJ94667.1, BAJ90886.1, BAK03725.1, BAJ93106.1, BAK06601.1
2	GO:0051179	localization	Biological Process	GO:0008150	biological_process	2.16	6	5	1	BAJ85560.1, BAJ90886.1, BAJ95664.1, BAJ98137.1, BAJ87174.1, BAJ98990.1
3	GO:0051234	establishment of localization	Biological Process	GO:0051179	localization	3.6	6	5	1	BAJ85560.1, BAJ90886.1, BAJ95664.1, BAJ98137.1, BAJ87174.1, BAJ98990.1
4	GO:0006810	transport	Biological Process	GO:0051234	establishment of localization	6	6	5	1	BAJ85560.1, BAJ90886.1, BAJ95664.1, BAJ98137.1, BAJ87174.1, BAJ98990.1

## Sheet: Datasheet 1C_GO_CC 
Data sheet 1C. Gene ontology annotation of differentialy regulated proteins found between roots of untreated WT and HvMPK3 KO lines according to cellular compartment
Level	GO ID	GO Name	GO Type	Parents (ACC)	Parents (Name)	Nodescore	#Seqs	Sequence Names
1	GO:0005575	cellular component	Cellular Component			17.77	43	BAJ86792.1	BAJ86838.1	BAJ98947.1	BAK06364.1	BAK02020.1	BAJ98381.1	BAJ96517.1	BAJ89352.1	BAJ98137.1	BAJ87174.1	sp|Q9XHS0.1|RS12_HORVU	BAJ88608.1	BAJ99821.1	BAJ95119.1	BAF03162.1	BAJ89493.1	BAJ88575.1	BAJ95272.1	BAK00894.1	BAJ85483.1	BAJ85988.1	AAB59330.1	BAK03413.1	BAJ85566.1	BAJ86014.1	BAJ98536.1	BAK01044.1	BAJ87582.1	CBM35779.1	BAJ93482.1	BAJ98167.1	BAJ85560.1	BAJ91305.1	BAJ91327.1	BAJ90883.1	BAJ90393.1	BAJ90886.1	BAK03725.1	BAJ93214.1	BAB61039.1	BAJ85943.1	BAJ95664.1
2	GO:0110165	cellular anatomical entity	Cellular Component	GO:0005575	cellular_component	28.67	43	BAJ86792.1	BAJ86838.1	BAJ98947.1	BAK06364.1	BAK02020.1	BAJ98381.1	BAJ96517.1	BAJ89352.1	BAJ98137.1	BAJ87174.1	sp|Q9XHS0.1|RS12_HORVU	BAJ88608.1	BAJ99821.1	BAJ95119.1	BAF03162.1	BAJ89493.1	BAJ88575.1	BAJ95272.1	BAK00894.1	BAJ85483.1	BAJ85988.1	AAB59330.1	BAK03413.1	BAJ85566.1	BAJ86014.1	BAJ98536.1	BAK01044.1	BAJ87582.1	CBM35779.1	BAJ93482.1	BAJ98167.1	BAJ85560.1	BAJ91305.1	BAJ91327.1	BAJ90883.1	BAJ90393.1	BAJ90886.1	BAK03725.1	BAJ93214.1	BAB61039.1	BAJ85943.1	BAJ95664.1
2	GO:0005622	intracellular	Cellular Component	GO:0005575	cellular_component	17.75	28	BAJ86792.1	BAJ86838.1	BAK06364.1	BAK02020.1	BAJ89352.1	BAJ87174.1	sp|Q9XHS0.1|RS12_HORVU	BAJ88608.1	BAJ99821.1	BAF03162.1	BAJ89493.1	AAB59330.1	BAK03413.1	BAJ86014.1	BAJ98536.1	BAJ87582.1	CBM35779.1	BAJ93482.1	BAJ98167.1	BAJ85560.1	BAJ91305.1	BAJ91327.1	BAJ90393.1	BAJ90886.1	BAK03725.1	BAJ85943.1	BAB61039.1	BAJ95664.1
3	GO:0005737	cytoplasm	Cellular Component	GO:0005622, GO:0110165	intracellular, cellular anatomical entity	25.4	20	BAJ86792.1	BAJ86838.1	AAB59330.1	BAK03413.1	BAJ89352.1	BAJ86014.1	BAJ98536.1	BAJ87582.1	CBM35779.1	BAJ93482.1	BAJ87174.1	BAJ85560.1	BAJ91305.1	BAJ91327.1	BAJ90393.1	BAJ90886.1	BAF03162.1	BAJ89493.1	BAJ95664.1	BAB61039.1
3	GO:0043226	organelle	Cellular Component	GO:0110165	cellular anatomical entity	4.02	18	BAJ86838.1	BAK06364.1	BAK02020.1	AAB59330.1	BAK03413.1	BAJ89352.1	BAJ98536.1	CBM35779.1	sp|Q9XHS0.1|RS12_HORVU	BAJ98167.1	BAJ88608.1	BAJ91327.1	BAJ99821.1	BAJ90886.1	BAK03725.1	BAJ89493.1	BAJ85943.1	BAB61039.1
3	GO:0043229	intracellular organelle	Cellular Component	GO:0043226, GO:0005622	organelle, intracellular	6.7	18	BAJ86838.1	BAK06364.1	BAK02020.1	AAB59330.1	BAK03413.1	BAJ89352.1	BAJ98536.1	CBM35779.1	sp|Q9XHS0.1|RS12_HORVU	BAJ98167.1	BAJ88608.1	BAJ91327.1	BAJ99821.1	BAJ90886.1	BAK03725.1	BAJ89493.1	BAJ85943.1	BAB61039.1
4	GO:0043231	intracellular membrane-bounded organelle	Cellular Component	GO:0043227, GO:0043229	membrane-bounded organelle, intracellular organelle	7.63	13	BAJ86838.1	AAB59330.1	BAK03413.1	BAJ89352.1	BAJ98536.1	CBM35779.1	BAJ98167.1	BAJ99821.1	BAJ91327.1	BAK03725.1	BAJ90886.1	BAJ89493.1	BAB61039.1
4	GO:0043227	membrane-bounded organelle	Cellular Component	GO:0043226	organelle	4.58	13	BAJ86838.1	AAB59330.1	BAK03413.1	BAJ89352.1	BAJ98536.1	CBM35779.1	BAJ98167.1	BAJ99821.1	BAJ91327.1	BAK03725.1	BAJ90886.1	BAJ89493.1	BAB61039.1
3	GO:0016020	membrane	Cellular Component	GO:0110165	cellular anatomical entity	10.6	10	BAJ85483.1	BAJ90883.1	BAJ90886.1	BAJ95119.1	BAJ96517.1	BAJ93214.1	BAJ95664.1	BAJ88350.1	BAJ95272.1	BAJ98167.1
3	GO:0005576	extracellular region	Cellular Component	GO:0110165	cellular anatomical entity	7	7	BAJ98947.1	BAK00894.1	BAJ98381.1	BAJ85988.1	BAJ85566.1	BAK01044.1	BAJ88575.1
4	GO:0043232	intracellular non-membrane-bounded organelle	Cellular Component	GO:0043229, GO:0043228	intracellular organelle, non-membrane-bounded organelle	3.6	6	BAJ86838.1	BAK06364.1	BAK02020.1	BAJ88608.1	BAJ85943.1	sp|Q9XHS0.1|RS12_HORVU
4	GO:0043228	non-membrane-bounded organelle	Cellular Component	GO:0043226	organelle	2.16	6	BAJ86838.1	BAK06364.1	BAK02020.1	BAJ88608.1	BAJ85943.1	sp|Q9XHS0.1|RS12_HORVU
5	GO:0005840	ribosome	Cellular Component	GO:0043232	intracellular non-membrane-bounded organelle	5	5	BAK06364.1	BAK02020.1	BAJ88608.1	BAJ85943.1	sp|Q9XHS0.1|RS12_HORVU
5	GO:0005634	nucleus	Cellular Component	GO:0043231	intracellular membrane-bounded organelle	5.72	5	BAJ86838.1	BAJ99821.1	BAK03725.1	BAB61039.1	BAJ98167.1
4	GO:0009536	plastid	Cellular Component	GO:0043231, GO:0005737	intracellular membrane-bounded organelle, cytoplasm	2.4	4	AAB59330.1	BAK03413.1	BAJ89352.1	CBM35779.1
4	GO:0005739	mitochondrion	Cellular Component	GO:0043231, GO:0005737	intracellular membrane-bounded organelle, cytoplasm	4	4	BAJ91327.1	BAJ90886.1	BAK03413.1	BAJ98536.1
5	GO:0009507	chloroplast	Cellular Component	GO:0009536	plastid	4	4	AAB59330.1	BAK03413.1	BAJ89352.1	CBM35779.1
[truncated: 1 more columns]

## Sheet: Datasheet 1D_KEGG pathway 
Data sheet 1D. KEGG Pathway analysis of differentialy regulated proteins found between roots of untreated WT and HvMPK3 KO lines.
Pathway	Pathway ID	#Enzs in Pathway	Enzyme	#Seqs of Enzyme	Seqs
Purine metabolism	map00230	4	ec:3.6.1.3 - adenylpyrophosphatase, ec:3.6.1.9 - diphosphatase, ec:3.6.1.15 - phosphatase, ec:2.7.1.40 - kinase	3, 1, 1, 1	BAJ91305.1, BAJ86014.1, BAJ87582.1, BAK06601.1, BAJ86014.1, BAJ94667.1
Starch and sucrose metabolism	map00500	4	ec:3.6.1.9 - diphosphatase, ec:3.2.1.48 - alpha-glucosidase, ec:3.2.1.20 - maltase, ec:3.2.1.26 - invertase	1, 1, 1, 1	BAK06601.1, BAJ88350.1, BAJ88350.1, BAJ88350.1
Pyruvate metabolism	map00620	3	ec:1.1.1.39 - dehydrogenase (decarboxylating), ec:2.7.1.40 - kinase, ec:1.1.1.38 - dehydrogenase (oxaloacetate-decarboxylating)	1, 1, 1	ACI46151.1, BAJ94667.1, ACI46151.1
Galactose metabolism	map00052	3	ec:1.1.1.21 - reductase, ec:3.2.1.20 - maltase, ec:3.2.1.26 - invertase	1, 1, 1	BAF03162.1, BAJ88350.1, BAJ88350.1
Alanine, aspartate and glutamate metabolism	map00250	3	ec:2.6.1.2 - transaminase, ec:6.3.1.2 - synthetase, ec:2.6.1.12 - transaminase	1, 1, 1	BAK07780.1, AFX60876.1, BAK07780.1
Glyoxylate and dicarboxylate metabolism	map00630	2	ec:4.2.1.3 - hydratase, ec:6.3.1.2 - synthetase	1, 1	BAJ85661.1, AFX60876.1
Glycolysis / Gluconeogenesis	map00010	2	ec:1.1.1.2 - dehydrogenase (NADP+), ec:2.7.1.40 - kinase	1, 1	BAF03162.1, BAJ94667.1
Phenylalanine, tyrosine and tryptophan biosynthesis	map00400	2	ec:2.4.2.18 - phosphoribosyltransferase, ec:2.5.1.54 - synthase	1, 1	BAJ96150.1, BAJ89352.1
Glycerolipid metabolism	map00561	2	ec:1.1.1.2 - dehydrogenase (NADP+), ec:1.1.1.21 - reductase	1, 1	BAF03162.1, BAF03162.1
Arginine biosynthesis	map00220	2	ec:2.6.1.2 - transaminase, ec:6.3.1.2 - synthetase	1, 1	BAK07780.1, AFX60876.1
Pentose and glucuronate interconversions	map00040	2	ec:1.1.1.2 - dehydrogenase (NADP+), ec:1.1.1.21 - reductase	1, 1	BAF03162.1, BAF03162.1
Cysteine and methionine metabolism	map00270	2	ec:1.13.11.54 - dioxygenase [iron(II)-requiring], ec:3.3.1.1 - S-adenosylhomocysteine synthase	1, 1	BAB61039.1, BAJ88218.1
Drug metabolism - other enzymes	map00983	2	ec:3.6.1.23 - diphosphatase, ec:2.5.1.18 - transferase	1, 1	BAK06601.1, BAK00626.1
Carbon fixation in photosynthetic organisms	map00710	2	ec:2.6.1.2 - transaminase, ec:1.1.1.39 - dehydrogenase (decarboxylating)	1, 1	BAK07780.1, ACI46151.1
Fatty acid biosynthesis	map00061	2	ec:2.3.1.85 - synthase system, ec:1.1.1.100 - reductase	1, 1	CBM35779.1, CBM35779.1
Pyrimidine metabolism	map00240	2	ec:3.6.1.9 - diphosphatase, ec:3.6.1.23 - diphosphatase	1, 1	BAK06601.1, BAK06601.1
Citrate cycle (TCA cycle)	map00020	2	ec:4.2.1.3 - hydratase, ec:1.1.1.41 - dehydrogenase (NAD+)	1, 1	BAJ85661.1, BAJ91327.1
Phenylpropanoid biosynthesis	map00940	1	ec:1.11.1.7 - lactoperoxidase	1	BAJ98381.1
Glutathione metabolism	map00480	1	ec:2.5.1.18 - transferase	1	BAK00626.1
Caprolactam degradation	map00930	1	ec:1.1.1.2 - dehydrogenase (NADP+)	1	BAF03162.1
Biotin metabolism	map00780	1	ec:1.1.1.100 - reductase	1	CBM35779.1
Pantothenate and CoA biosynthesis	map00770	1	ec:3.6.1.9 - diphosphatase	1	BAK06601.1
Nicotinate and nicotinamide metabolism	map00760	1	ec:3.6.1.9 - diphosphatase	1	BAK06601.1
alpha-Linolenic acid metabolism	map00592	1	ec:1.3.3.6 - oxidase	1	BAJ89493.1
Drug metabolism - cytochrome P450	map00982	1	ec:2.5.1.18 - transferase	1	BAK00626.1
Biosynthesis of unsaturated fatty acids	map01040	1	ec:1.3.3.6 - oxidase	1	BAJ89493.1
Metabolism of xenobiotics by cytochrome P450	map00980	1	ec:2.5.1.18 - transferase	1	BAK00626.1
Nitrogen metabolism	map00910	1	ec:6.3.1.2 - synthetase	1	AFX60876.1
Aminoacyl-tRNA biosynthesis	map00970	1	ec:6.1.1.22 - ligase	1	BAJ94908.1
Terpenoid backbone biosynthesis	map00900	1	ec:5.3.3.2 - Delta-isomerase	1	BAJ86792.1
Riboflavin metabolism	map00740	1	ec:3.6.1.9 - diphosphatase	1	BAK06601.1
Thiamine metabolism	map00730	1	ec:3.6.1.15 - phosphatase	1	BAJ86014.1
Biosynthesis of siderophore group nonribosomal peptides	map01053	1	ec:1.3.1.28 - dehydrogenase	1	CBM35779.1
Folate biosynthesis	map00790	1	ec:1.1.1.21 - reductase	1	BAF03162.1
Carbon fixation pathways in prokaryotes	map00720	1	ec:4.2.1.3 - hydratase	1	BAJ85661.1
beta-Alanine metabolism	map00410	1	ec:1.3.3.6 - oxidase	1	BAJ89493.1
Fatty acid degradation	map00071	1	ec:1.3.3.6 - oxidase	1	BAJ89493.1
Pentose phosphate pathway	map00030	1	ec:2.2.1.2 - dihydroxyacetonetransferase	1	BAK03413.1
Other glycan degradation	map00511	1	ec:3.2.1.24 - alpha-D-mannosidase	1	BAJ95309.1
Porphyrin and chlorophyll metabolism	map00860	1	ec:5.4.3.8 - 2,1-aminomutase	1	AAB59330.1
Fructose and mannose metabolism	map00051	1	ec:1.1.1.21 - reductase	1	BAF03162.1
Propanoate metabolism	map00640	1	ec:1.3.3.6 - oxidase	1	BAJ89493.1

## Sheet: Datasheet 1E domains
Data sheet 1E. Evaluation of InterPro protein domains in protein sequences of differentialy regulated proteins found between roots of untreated WT and HvMPK3 KO lines.
IPS Domain	#Seqs
(IPR033905) Secretory peroxidase	5	BAJ98947.1, BAK00894.1, BAJ98381.1, BAJ85988.1, BAJ85566.1
(IPR002016) Haem peroxidase	5	BAJ98947.1, BAK00894.1, BAJ98381.1, BAJ85988.1, BAJ85566.1
(IPR010987) Glutathione S-transferase, C-terminal-like	3	CBD33999.1, BAK01391.1, BAK00626.1
(IPR004045) Glutathione S-transferase, N-terminal	3	CBD33999.1, BAK01391.1, BAK00626.1
(IPR033121) Peptidase family A1 domain	2	BAJ91382.1, BAK01698.1
(IPR004046) Glutathione S-transferase, C-terminal	2	CBD33999.1, BAK01391.1
(IPR034347) Glutathione S-transferases Phi, C-terminal	2	CBD33999.1, BAK01391.1
(IPR032861) Xylanase inhibitor, N-terminal	2	BAJ91382.1, BAK01698.1
(IPR013189) Glycosyl hydrolase family 32, C-terminal	2	BAJ93214.1, BAJ88350.1
(IPR023210) NADP-dependent oxidoreductase domain	2	BAF03162.1, BAJ87174.1
(IPR032799) Xylanase inhibitor, C-terminal	2	BAJ91382.1, BAK01698.1
(IPR017986) WD40-repeat-containing domain	2	BAJ85560.1, BAJ98167.1
(IPR002775) DNA/RNA-binding protein Alba-like	2	BAJ98262.1, BAJ96858.1
(IPR006045) Cupin 1	2	BAJ90423.1, BAJ98137.1
(IPR021792) Beta-fructofuranosidase	2	BAJ93214.1, BAJ88350.1
(IPR013148) Glycosyl hydrolase family 32, N-terminal	2	BAJ93214.1, BAJ88350.1
(IPR000608) Ubiquitin-conjugating enzyme E2	2	BAJ85100.1, BAK01323.1
(IPR005818) Linker histone H1/H5, domain H15	1	BAJ99821.1
(IPR032454) Histone H2A, C-terminal domain	1	BAK03725.1
(IPR001155) NADH:flavin oxidoreductase/NADH oxidase, N-terminal	1	BAK01971.1
(IPR004839) Aminotransferase, class I/classII	1	BAK07780.1
(IPR004864) Late embryogenesis abundant protein, LEA_2 subgroup	1	BAJ87911.1
(IPR034285) Laccase, second cupredoxin domain	1	BAJ88575.1
(IPR024283) Translocase of chloroplast 159/132, membrane anchor domain	1	BAK02477.1
(IPR029054) dUTPase-like	1	BAK06601.1
(IPR001279) Metallo-beta-lactamase	1	BAK05254.1
(IPR000873) AMP-dependent synthetase/ligase	1	BAJ95119.1
(IPR033868) Xylanase inhibitor I-like	1	BAK01698.1
(IPR012960) Dyskerin-like	1	BAJ93106.1
(IPR025131) Domain of unknown function DUF4057	1	BAJ95192.1
(IPR008333) Flavoprotein pyridine nucleotide cytochrome reductase-like, FAD-binding domain	1	CBM38649.1
(IPR001223) Glycoside hydrolase family 18, catalytic domain	1	BAJ95922.1
(IPR017927) FAD-binding domain, ferredoxin reductase-type	1	CBM38649.1
(IPR007125) Histone H2A/H2B/H3	1	BAK03725.1
(IPR024298) Ancestral coatomer element 1, Sec16/Sec31	1	BAJ85560.1
(IPR004365) OB-fold nucleic acid binding domain, AA-tRNA synthetase-type	1	BAJ94908.1
(IPR003128) Villin headpiece	1	BAJ91166.1
(IPR026894) DNAJ-containing protein, X-domain	1	BAK03712.1
(IPR008147) Glutamine synthetase, beta-Grasp domain	1	AFX60876.1
(IPR005123) Oxoglutarate/iron-dependent dioxygenase	1	BAJ89823.1
(IPR031167) OBG-type guanine nucleotide-binding (G) domain	1	BAJ87582.1
(IPR006091) Acyl-CoA oxidase/dehydrogenase, central domain	1	BAJ89493.1
(IPR000626) Ubiquitin-like domain	1	BAJ97350.1
(IPR001117) Multicopper oxidase, type 1	1	BAJ88575.1
(IPR004088) K Homology domain, type 1	1	BAJ93831.1
(IPR000008) C2 domain	1	BAJ96517.1
(IPR034289) Laccase, third cupredoxin domain	1	BAJ88575.1
(IPR001433) Oxidoreductase FAD/NAD(P)-binding	1	CBM38649.1
(IPR000994) Peptidase M24	1	ADK78215.1
(IPR023573) Ribosomal protein 50S-L18Ae/60S-L20/60S-L18A	1	BAJ85943.1
(IPR032819) tRNA pseudouridylate synthase B, C-terminal	1	BAJ93106.1
(IPR006073) GTP binding domain	1	BAJ87582.1
(IPR033704) dUTPase, trimeric	1	BAK06601.1
(IPR008152) Clathrin adaptor, alpha/beta/gamma-adaptin, appendage, Ig-like subdomain	1	BAJ95664.1
(IPR026992) Non-haem dioxygenase N-terminal domain	1	BAJ89823.1
(IPR002735) Translation initiation factor IF2/IF5	1	BAJ87466.1
(IPR007717) Nuclear pore localisation protein NPL4, C-terminal	1	BAJ97350.1
(IPR002553) Clathrin/coatomer adaptor, adaptin-like, N-terminal	1	BAJ95664.1
(IPR001030) Aconitase/3-isopropylmalate dehydratase large subunit, alpha/beta/alpha domain	1	BAJ85661.1
(IPR037518) MPN domain	1	BAJ97350.1
(IPR000738) WHEP-TRS domain	1	BAJ94908.1
(IPR001853) DSBA-like thioredoxin domain	1	BAJ98358.1
(IPR008146) Glutamine synthetase, catalytic domain	1	AFX60876.1
(IPR000312) Glycosyl transferase, family 3	1	BAJ96150.1
(IPR000086) NUDIX hydrolase domain	1	BAJ86792.1
(IPR017459) Glycosyl transferase family 3, N-terminal domain	1	BAJ96150.1
(IPR001709) Flavoprotein pyridine nucleotide cytochrome reductase	1	CBM38649.1
(IPR004521) Uncharacterised domain CHP00451	1	BAJ93106.1
(IPR004038) Ribosomal protein L7Ae/L30e/S12e/Gadd45	1	sp|Q9XHS0.1|RS12_HORVU
(IPR000602) Glycoside hydrolase family 38, N-terminal domain	1	BAJ95309.1
(IPR011707) Multicopper oxidase, type 3	1	BAJ88575.1
(IPR006195) Aminoacyl-tRNA synthetase, class II	1	BAJ94908.1
(IPR015151) Beta-adaptin appendage, C-terminal subdomain	1	BAJ95664.1
(IPR020807) Polyketide synthase, dehydratase domain	1	BAK02053.1
(IPR015793) Pyruvate kinase, barrel	1	BAJ94667.1
(IPR015310) Activator of Hsp90 ATPase, N-terminal	1	BAJ92901.1
(IPR011706) Multicopper oxidase, type 2	1	BAJ88575.1
(IPR006703) AIG1-type guanine nucleotide-binding (G) domain	1	BAK02477.1
(IPR041997) Ribosomal Protein L6, KOW domain	1	BAJ88608.1
(IPR012301) Malic enzyme, N-terminal domain	1	ACI46151.1
(IPR034288) Laccase, first cupredoxin domain	1	BAJ88575.1
(IPR025110) AMP-binding enzyme, C-terminal domain	1	BAJ95119.1
(IPR007123) Gelsolin-like domain	1	BAJ91166.1
(IPR041706) YchF, N-terminal	1	BAJ87582.1
(IPR000573) Aconitase A/isopropylmalate dehydratase small subunit, swivel domain	1	BAJ85661.1
(IPR002501) Pseudouridine synthase II, N-terminal	1	BAJ93106.1
(IPR013029) YchF, C-terminal domain	1	BAJ87582.1
(IPR011765) Peptidase M16, N-terminal	1	BAJ87789.1
(IPR004364) Aminoacyl-tRNA synthetase, class II (D/K/N)	1	BAJ94908.1
(IPR001623) DnaJ domain	1	BAK03712.1
(IPR041147) Glycosyl hydrolases family 38, C-terminal beta sandwich domain	1	BAJ95309.1
(IPR002655) Acyl-CoA oxidase, C-terminal	1	BAJ89493.1
(IPR009081) Phosphopantetheine binding ACP domain	1	BAJ98536.1
(IPR014044) CAP domain	1	BAK01044.1
(IPR007863) Peptidase M16, C-terminal	1	BAJ87789.1
(IPR015878) S-adenosyl-L-homocysteine hydrolase, NAD binding domain	1	BAJ88218.1
(IPR011682) Glycosyl hydrolase family 38, C-terminal	1	BAJ95309.1
(IPR016040) NAD(P)-binding domain	1	BAJ85483.1
(IPR003307) W2 domain	1	BAJ87466.1
(IPR024084) Isopropylmalate dehydrogenase-like domain	1	BAJ91327.1
(IPR015341) Glycoside hydrolase family 38, central domain	1	BAJ95309.1
(IPR002828) Survival protein SurE-like phosphatase/nucleotidase	1	BAJ87892.1
(IPR012302) Malic enzyme, NAD-binding	1	ACI46151.1
(IPR000717) Proteasome component (PCI) domain	1	BAK02053.1
(IPR015795) Pyruvate kinase, C-terminal	1	BAJ94667.1
(IPR002478) PUA domain	1	BAJ93106.1
(IPR007052) CS domain	1	BAJ94677.1
(IPR029320) Acyl-coenzyme A oxidase, N-terminal	1	BAJ89493.1
