# Supplementary material for: TALEN-Based HvMPK3 Knock-Out Attenuates Proteome and Root Hair Phenotypic Responses to flg22 in Barley
Source: Front Plant Sci. 2021 Apr 29;12:666229. doi: 10.3389/fpls.2021.666229 (PMC8117018; doi:10.3389/fpls.2021.666229)
Supplement: Supplementary Data Sheet 2 — Differentially regulated proteins found between above ground parts of wild type and HvMPK3 KO lines and their bioinformatic evaluation. [file Data_Sheet_2.xlsx]

## Sheet: Data sheet 2A_list
Data sheet 2A. Summary of differentialy regulated proteins found between above ground parts of untreated WT and HvMPK3 KO lines.
Accession	MW [kDa]	calc. pI	Description	Ratio (HvMPK3 KO vs wild type)	P-value	Mean (HvMPK3 KO)	Variance (HvMPK3 KO)	Mean (wild type)	Variance (wild type)
			Stress response
326499596	9,1	8.13	Name:"Similar to Defensin Tm-AMP-D1.2 (Triticum monococcum OX=4568)"	2.63791743540636	0.00962259999999993	136047.01634799	875660044.64638	51573.6446190299	112248867.471348
326514166	35.3	6.8	Name:"Similar to ANN2 Annexin D2 (Arabidopsis thaliana OX=3702)"	Unique in HvMPK3 KO	NA	130804.91843124	9762564187.67908	0	0
326494742	14.4	5.07	Name:"Similar to Os06g0320000 Thioredoxin-like protein Clot (Oryza sativa subsp. japonica OX=39947)"	0.399436596806973	0.0460440000000001	234489.984908021	15656454606.002	587051.829458025	30014420657.4804
326511874	36.7	7.8	Name:"Similar to CEBIP Chitin elicitor-binding protein (Oryza sativa subsp. japonica OX=39947)"	0.548635543496767	0.00170433999999997	425237.794851078	545810358.616669	775082.47486263	6018020562.368
199582497	21.9	8.85	late embryogenesis abundant protein [Hordeum vulgare subsp. vulgare]	Unique in HvMPK3 KO	NA	198772.988449135	11572432740.3186	0	0
326511186	34.2	7.9	Name:"Similar to GSVIVT00023967001 Peroxidase 4 (Vitis vinifera OX=29760)"	Unique in HvMPK3 KO	NA	0	0	147358.29398875	7915156841.82596
15080682	31.7	7.99	peroxisome type ascorbate peroxidase [Hordeum vulgare subsp. vulgare]	Unique in HvMPK3 KO	NA	0	0	106007.39495942	6590327045.67903
257660166	34.8	8.18	Name:"Similar to PER70 Peroxidase 70 (Zea mays OX=4577)"	0.444486897910709	0.029963	451282.727803381	38120462761.6491	1015289.15683368	49571896162.4528
410443515	20.2	5.63	Cu/Zn superoxide dismutase (chloroplast) [Hordeum vulgare subsp. vulgare]	0.518611814100904	0.0493439999999999	1733851.18858586	763440036857.763	3343254.32133043	235317194508.651
326509513	33.9	4.89	Name:"Similar to PER43 Peroxidase 43 (Arabidopsis thaliana OX=3702)"	0.632869071797464	0.025215	622193.556554085	2137676211.66877	983131.55798077	30020695937.3574
326489308	18.3	6.55	Name:"Similar to CSA Probable phospholipid hydroperoxide glutathione peroxidase (Citrus sinensis OX=2711)"	2.54715655545025	0.0401589999999999	619803.079350214	20469943385.4149	243331.36415349	26946366181.8429
326514808	36.4	8.81	Name:"Similar to tpcF Glutathione S-transferase-like protein tpcF (Neosartorya fumigata (strain ATCC MYA-4609 / Af293 / CBS 101355 / FGSC A1100) OX=330879)"	0.645593689501329	0.030537	84949.8583548438	8131506.75734856	131584.090328487	131015398.467842
			Translation
326508072	31.9	8.27	Name:"Similar to PNP2 Polyribonucleotide nucleotidyltransferase 2, mitochondrial (Oryza sativa subsp. japonica OX=39947)"	Unique in HvMPK3 KO	NA	167412.162357366	8286526203.53992	0	0
326523119	15.6	6.54	Name:"Similar to RPL31 50S ribosomal protein L31, chloroplastic (Arabidopsis thaliana OX=3702)"	0.607251863560821	0.0152412	425130.74818427	112776079.593985	700089.65586598	5348225232.55671
326499442	22.2	9.91	Name:"Similar to RPS5A 40S ribosomal protein S5-1 (Arabidopsis thaliana OX=3702)"	1.68277804472402	0.053742	153870.66008136	1409612512.3777	91438.4761340257	186983655.837998
1681061656	13.1	9.58	translational initiation factor 1 (chloroplast) [Hordeum vulgare subsp. spontaneum]	2.25893671121596	0.00865559999999999	507305.426037249	2960282499.46411	224577.086873838	7450079012.49004
326495206	33.2	7.91	Name:"Similar to RNS2 Ribonuclease 2 (Arabidopsis thaliana OX=3702)"	2.5683295943838	0.0179243	111676.884792036	9991411.9982799	43482.3026749531	161355718.99212
7711024	24.5	4.67	Name:"Similar to Elongation factor 1-delta (Pimpinella brachycarpa OX=45043)"	2.94174000576402	0.035181	348178.239752697	9548859206.63601	118357.923905743	6623835695.80083
326500472	23.3	4.67	Name:"Similar to Elongation factor 1-beta (Triticum aestivum OX=4565)"	3.19046614050426	0.053504	1221020.22681768	263474859898.494	382709.037816241	23488197986.9482
326510251	85.1	6.1	Name:"Similar to LOS1 Elongation factor 2 (Arabidopsis thaliana OX=3702)"	Unique in HvMPK3 KO	NA	145922.138330142	9456928702.80474	0	0
326495978	12.6	4.37	Name:"Similar to Nascent polypeptide-associated complex subunit alpha-like protein (Pinus taeda OX=3352)"	1.79899098901363	0.00357829999999992	2944138.86231879	63775242410.8741	1636550.08852103	72478510495.5081
933919530	46.8	6.58	eukaryotic elongation factor 1 gamma [Hordeum vulgare]	Unique in HvMPK3 KO	NA	183818.386665974	17512569279.5218	0	0
326516634	20.8	11.3	Name:"Similar to RPS20 30S ribosomal protein S20, chloroplastic (Spinacia oleracea OX=3562)"	Unique in HvMPK3 KO	NA	225219.005167407	11898955060.1527	0	0
326506132	71.1	5.19	Name:"Similar to MED37E Probable mediator of RNA polymerase II transcription subunit 37e (Arabidopsis thaliana OX=3702)"	Unique in HvMPK3 KO	NA	467825.904702811	37818216149.8512	0	0
326511122	71.7	6.74	Name:"Similar to PAB2 Polyadenylate-binding protein 2 (Arabidopsis thaliana OX=3702)"	Unique in HvMPK3 KO	NA	143406.095573793	1390567194.39346	0	0
326507922	15	10.48	Name:"Similar to RPL23A 60S ribosomal protein L23 (Arabidopsis thaliana OX=3702)"	Unique in HvMPK3 KO	NA	333528.471329975	50557857155.2493	0	0
326517348	30.4	5.52	Name:"Similar to rpsR 30S ribosomal protein S18 (Thermus thermophilus (strain HB8 / ATCC 27634 / DSM 579) OX=300852)"	Unique in WT	NA	0	0	106875.93148855	2305618163.65151
			Plastidic and photosynthetic proteins
326531916	29.3	9.07	Name:"Similar to PAP6 Plastid-lipid-associated protein 6, chloroplastic (Arabidopsis thaliana OX=3702)"	0.465810758325626	0.0397759999999999	1022801.98902471	72414837223.4423	2195745.74168533	384856640404.333
326534362	18.9	5.68	Name:"Similar to LTD Protein LHCP TRANSLOCATION DEFECT (Oryza sativa subsp. japonica OX=39947)"	0.314012681279239	0.000863110000000056	454367.402883487	5242053488.52793	1446971.50775078	31749872873.0529
326488063	11.7	9.82	Name:"Similar to NEET CDGSH iron-sulfur domain-containing protein NEET (Arabidopsis thaliana OX=3702)"	0.333210250837156	0.00515520000000003	52791.2445907439	562008130.589883	158432.234476915	88136579.8610982
326517188	22.5	5.85	Name:"Similar to ATPG ATP synthase subunit b', chloroplastic (Spinacia oleracea OX=3562)"	0.407596717758395	0.0380239999999999	258506.281506123	36351883901.6592	634220.714356573	9172184106.06752
119675663	8.9	6.92	photosystem I subunit C (chloroplast) [Hordeum vulgare subsp. vulgare]	0.478398725025495	0.0270820000000001	1801855.06865583	124461710705.979	3766429.49573037	872611241377.081
326506328	19.6	10.14	Name:"Similar to At2g44920 Thylakoid lumenal 15 kDa protein 1, chloroplastic (Arabidopsis thaliana OX=3702)"	0.502980924019222	0.0205569999999999	906224.533515761	866661034.78643	1801707.56034702	33143074318.7979
1334361	15.2	5.29	ATPase, subunit E (chloroplast) [Hordeum vulgare]	0.518825529554416	0.00854089999999996	955758.547086116	84719110441.726	1842157.89825715	16866271202.5487
326523645	20.9	6.55	Name:"Similar to At2g44920 Thylakoid lumenal 15 kDa protein 1, chloroplastic (Arabidopsis thaliana OX=3702)"	0.599110180381051	0.00411829999999991	1167070.32213999	11976343867.6777	1948006.16039892	40497318383.1703
326526875	24.8	9.41	Name:"Similar to PSAF Photosystem I reaction center subunit III, chloroplastic (Hordeum vulgare OX=4513)"	1.53506623223561	0.040439	1022467.58763413	39540608310.4432	666073.923172062	3152854008.80593
118430385	55.3	6.74	ATP synthase CF1 alpha subunit (chloroplast) [Hordeum vulgare subsp. vulgare]	1.70556257703399	0.0292640000000001	7096099.46461338	2203287497354.39	4160562.36233423	136429162127.087
521300948	21.4	9.32	ATP synthase CF0 subunit I (chloroplast) [Hordeum vulgare subsp. vulgare]	2.50680670817836	0.042542	280013.022070172	8874881051.09361	111701.08216028	981914957.227572
326519316	65.2	4.93	Name:"Similar to EGY2 Probable zinc metalloprotease EGY2, chloroplastic (Oryza sativa subsp. japonica OX=39947)"	Unique in WT	NA	0	0	104571.701807401	1227222860.00685
326499874	28.3	5.43	Name:"Similar to WHAB1.6 Chlorophyll a-b binding protein, chloroplastic (Triticum aestivum OX=4565)"	Unique in WT	NA	0	0	989327.302598258	355896534134.738
			Metabolism
326520698	31.6	6.89	Name:"Similar to HO1 Heme oxygenase 1, chloroplastic (Oryza sativa subsp. japonica OX=39947)"	0.504173119130396	0.031022	51969.7837220413	270155375.166364	103079.24351794	95444134.6530081
326505782	23.9	5.74	Name:"Similar to NUDT26 Nudix hydrolase 26, chloroplastic (Arabidopsis thaliana OX=3702)"	Unique in WT	NA	0	0	116793.035824513	2807565011.29695
295415540	39.8	6.71	Name:"Similar to CYSC Bifunctional L-3-cyanoalanine synthase/cysteine synthase, mitochondrial (Spinacia oleracea OX=3562)"	0.472709661521644	0.0469039999999999	440209.613538163	52523806270.1257	931247.33715223	37214779482.5411
1041423	46.2	6.44	aminolevulinate dehydratase [Hordeum vulgare subsp. vulgare]	2.2417537705607	0.0110571	187781.958967215	100929727.887142	83765.6487671467	562761140.52104
326494234	27.1	5.1	Name:"Similar to ROMT-15 Tricin synthase 1 (Oryza sativa subsp. japonica OX=39947)"	1.57475011732146	0.052822	158135.238195771	58920026.7578343	100419.257923122	589909943.691019
326522650	40.2	5.54	Name:"Similar to Phosphoglycerate kinase, cytosolic (Triticum aestivum OX=4565)"	1.86735817473472	0.00516170000000005	796366.96859718	7219707289.02822	426467.176662727	6115938723.59472
1706082	55.9	5.64	RecName: Full=Serine carboxypeptidase II-3; AltName: Full=CP-MII.3; Contains: RecName: Full=Serine carboxypeptidase II-3 chain A; Contains: RecName: Full=Serine carboxypeptidase II-3 chain B; Flags: Precursor	2.03870096260785	0.00187918000000009	292839.032372308	110517078.068567	143640.012803897	312695157.86436
326526047	45.4	6.57	Name:"Similar to PYD1 Dihydropyrimidine dehydrogenase (NADP(+)), chloroplastic (Arabidopsis thaliana OX=3702)"	2.22996719199959	0.047916	219057.784678926	748622430.00367	98233.6356628185	2131483797.39653
326511579	41.8	5.86	Name:"Similar to IMDH2 3-isopropylmalate dehydrogenase 2, chloroplastic (Arabidopsis thaliana OX=3702)"	2.90833249223749	0.03152	278701.730517834	3966811939.38508	95828.7029635383	305849492.623297
326490934	48.2	5.55	Name:"Similar to ENO1 Enolase (Oryza sativa subsp. japonica OX=39947)"	3.10595177763799	0.00672130000000004	396112.711119605	879675037.849405	127533.438854882	100063517.492571
326512878	57.9	6.05	Name:"Similar to HEXO1 Beta-hexosaminidase 1 (Arabidopsis thaliana OX=3702)"	0.415772771070041	0.046219	77654.1041644467	416241767.928146	186770.5380624	1776717090.64152
			Cell wall
326533780	28	9.28	Name:"Similar to FLA7 Fasciclin-like arabinogalactan protein 7 (Arabidopsis thaliana OX=3702)"	Unique in WT	NA	0	0	110517.539956819	4608137868.02752
326532634	46.8	7.46	Name:"Similar to PAE5 Pectin acetylesterase 5 (Arabidopsis thaliana OX=3702)"	0.5500124628844	0.025355	202299.42251932	3332710057.35434	367808.797383266	3452910560.69075
			Gene expression and epigenetic regulation
326522680	31.8	10.42	Name:"Similar to SR30 Serine/arginine-rich splicing factor SR30 (Arabidopsis thaliana OX=3702)"	Unique in WT	NA	0	0	331342.782320629	9192306278.40253
326505912	51.9	4.45	Name:"Similar to MBD10 Methyl-CpG-binding domain-containing protein 10 (Arabidopsis thaliana OX=3702)"	0.28892219215443	0.039543	121341.550902657	3065726201.49393	419980.029909919	26463103837.8945
326511082	44.3	5.08	Name:"Similar to ESA1 Histone acetyltransferase ESA1 (Ashbya gossypii (strain ATCC 10895 / CBS 109.51 / FGSC 9923 / NRRL Y-1056) OX=284811)"	Unique in HvMPK3 KO	NA	199840.960986253	6677054331.2641	0	0
			Cytoskeleton
326523781	15.9	6.2	Name:"Similar to ADF7 Actin-depolymerizing factor 7 (Oryza sativa subsp. japonica OX=39947)"	Unique in HvMPK3 KO	NA	75413.6881258223	795001628.318415	0	0
326517272	16.1	6.34	Name:"Similar to ADF4 Actin-depolymerizing factor 4 (Oryza sativa subsp. japonica OX=39947)"	0.634049708657827	0.018261	769092.441362913	1029864014.64319	1212984.45667761	38796198742.786
			Folding and proteolysis
326494260	32.2	6.23	Name:"Similar to DEGP5 Protease Do-like 5, chloroplastic (Arabidopsis thaliana OX=3702)"	0.587567705034757	0.029038	136781.780227439	1557222036.9022	232793.223751717	932808320.510753
326503598	41.8	7.59	Name:"Similar to PTAC5 Protein disulfide isomerase pTAC5, chloroplastic (Arabidopsis thaliana OX=3702)"	0.183197498637851	0.022161	92251.0339990608	2240042076.40361	503560.554510763	5515284903.82269
326505132	55.5	4.88	Name:"Similar to WAV3 E3 ubiquitin-protein ligase WAV3 (Arabidopsis thaliana OX=3702)"	Unique in HvMPK3 KO	NA	0	0	106474.221234537	1748912695.25869
326491605	39	5.83	Name:"Similar to ahsa Activator of 90 kDa heat shock protein ATPase homolog (Dictyostelium discoideum OX=44689)"	Unique in HvMPK3 KO	NA	0	0	349066.637981967	23679215809.1603
			Unknown
326515928	61	5.47	Name:"Similar to Natterin-3 (Thalassophryne nattereri OX=289382)"	Unique in HvMPK3 KO	NA	97393.2704791559	1524766794.40115	0	0
326488153	23.9	5.43	Name:"Similar to HEBP2 Heme-binding protein 2 (Homo sapiens OX=9606)"	0.619160162128793	0.021523	1348324.18051508	17199213392.845	2177666.23724511	136599375003.684
326507956	33.3	8.81	Name:"Similar to GSTZ5 Protein IN2-1 homolog B (Oryza sativa subsp. japonica OX=39947)"	2.09092827863602	0.025842	272062.343591586	3466677857.02049	130115.578985359	1585672008.05715
326513848	42.4	5.36	Name:"Similar to BP-73 SAP-like protein BP-73 (Oryza sativa subsp. japonica OX=39947)"	0.497402207739239	0.0476610000000001	126048.235691382	2087967616.52237	253413.100565613	4016767405.35094
			Signalling
296524586	47.6	4.63	Name:"Similar to CRO1 Calreticulin (Oryza sativa subsp. japonica OX=39947)"	2.14538748983742	0.0175642	304681.533751174	3227612.36028942	142017.01799532	951574762.465618
326500326	51.3	4.68	Name:"Similar to Os10g0370000 Probable protein phosphatase 2C 71 (Oryza sativa subsp. japonica OX=39947)"	Unique in WT	NA	0	0	179294.410728085	17979925136.0335
			Other functions
326509231	24.9	5.06	Name:"Similar to RBG3 Glycine-rich RNA-binding protein 3, mitochondrial (Arabidopsis thaliana OX=3702)"	0.5567216122419	0.035304	131023.419951517	110511.765422337	235348.183132123	1216731224.81688
326505986	43.8	5.36	Name:"Similar to AMC4 Metacaspase-4 (Arabidopsis thaliana OX=3702)"	0.33704220737924	0.050261	125045.581468718	1850976710.79103	371008.671112863	21779741441.2685
326492293	35	9.28	Name:"Similar to Os01g0895100 Probable membrane-associated 30 kDa protein, chloroplastic (Oryza sativa subsp. japonica OX=39947)"	0.414232712383223	0.054335	242435.985183318	8772532509.74857	585265.185331455	39745261040.2277
326507126	26	5.68	Name:"Similar to VPS24-1 Vacuolar protein sorting-associated protein 24 homolog 1 (Arabidopsis thaliana OX=3702)"	0.313874458639607	0.040095	41505.8455453623	73139.0541396646	132237.091623373	65393397.8080124
2493131	54	5.25	RecName: Full=V-type proton ATPase subunit B 1; Short=V-ATPase subunit B 1; AltName: Full=Vacuolar proton pump subunit B 1	1.50084177306959	0.0541430000000001	1517843.04351936	811917434.364768	1011327.82332877	48281463254.6286
326512666	15.4	5.3	Name:"Similar to Os05g0108800 Cytochrome b5 (Oryza sativa subsp. japonica OX=39947)"	Unique in HvMPK3 KO	NA	178304.541768071	2090328004.4524	0	0
326508444	29.9	7.31	Name:"Similar to VDAC3 Mitochondrial outer membrane protein porin 3 (Oryza sativa subsp. japonica OX=39947)"	Unique in WT	NA	0	0	233053.801188339	12754683929.6316

## Sheet: Data sheet 2B_GO_BP
Data sheet 2B. Gene ontology annotation of differentialy regulated proteins found between above ground parts of untreated WT and HvMPK3 KO lines according to biological process.
Level	GO ID	GO Name	GO Type	Parents (ACC)	Parents (Name)	Nodescore	#Seqs	Sequence Names
1	GO:0008150	biological_process	Biological Process			122.62	49	BAJ99765.1, AGP50751.1, CBL76025.1, BAJ86109.1, BAJ90386.1, BAK03346.1, BAJ87987.1, BAJ92712.1, BAJ99688.1, BAJ88386.1, BAB62533.1, CAA63139.1, BAJ90772.1, BAJ95640.1, BAJ93061.1, BAJ99489.1, BAJ91673.1, BAJ86032.1, BAK01637.1, BAJ96657.1, BAJ91934.1, CBM36948.1, BAJ92472.1, BAJ88371.1, CBD34112.1, BAJ91130.1, CAA25115.1, BAJ87942.1, BAJ88600.1, BAJ90134.1, AFV67833.1, BAK06252.1, sp|P52711.1|CBP…
2	GO:0009987	cellular process	Biological Process	GO:0008150	biological_process	54.63	44	AGP50751.1, BAJ99765.1, CBL76025.1, CAA25115.1, BAJ87942.1, BAJ88600.1, BAJ92712.1, BAJ90134.1, BAJ99688.1, AFV67833.1, BAK06252.1, BAJ88386.1, BAK00826.1, BAJ93200.1, BAJ89162.1, BAB62533.1, BAK00003.1, BAK00041.1, ABL95205.1, CAA63139.1, BAJ99960.1, BAJ90772.1, BAJ95640.1, YP_874650.1, BAJ93061.1, BAJ99489.1, BAJ91673.1, BAJ86032.1, BAJ91888.1, BAJ90399.1, BAK01637.1, BAJ96657.1, BAK05421.1, BA…
2	GO:0008152	metabolic process	Biological Process	GO:0008150	biological_process	61.79	37	AGP50751.1, BAJ99765.1, CBL76025.1, CAA25115.1, BAJ87942.1, BAK03346.1, BAJ90386.1, BAJ88600.1, BAJ92712.1, BAJ90134.1, BAJ99688.1, AFV67833.1, BAK06252.1, BAJ88386.1, BAK00826.1, sp|P52711.1|CBP23_HORVU, BAJ93200.1, BAB62533.1, BAK00041.1, CAA63139.1, ABL95205.1, BAJ99960.1, BAJ90772.1, YP_874650.1, BAJ91673.1, BAJ86032.1, BAJ90399.1, BAK01637.1, BAJ86704.1, BAJ86721.1, sp|Q40078.1|VATB1_HORVU, …
3	GO:0044237	cellular metabolic process	Biological Process	GO:0009987, GO:0008152	cellular process, metabolic process	11.71	22	AGP50751.1, BAJ99765.1, BAJ99960.1, BAJ90772.1, CAA25115.1, YP_874650.1, BAJ87942.1, BAJ88600.1, BAJ86032.1, BAJ90134.1, BAJ90399.1, BAJ99688.1, BAK06252.1, BAJ88386.1, BAJ86704.1, BAK00826.1, BAJ93200.1, BAJ92472.1, BAK00041.1, ABL95205.1, BAJ88371.1, BAJ91130.1
3	GO:0071704	organic substance metabolic process	Biological Process	GO:0008152	metabolic process	9.98	20	AGP50751.1, BAJ99960.1, BAJ90772.1, CAA25115.1, YP_874650.1, BAJ87942.1, BAK03346.1, BAJ88600.1, BAJ86032.1, BAJ90134.1, BAJ90399.1, BAK06252.1, BAJ88386.1, BAJ86704.1, sp|P52711.1|CBP23_HORVU, BAJ93200.1, BAJ92472.1, BAK00041.1, BAJ88371.1, BAJ91130.1
3	GO:0044238	primary metabolic process	Biological Process	GO:0008152	metabolic process	14.71	20	AGP50751.1, BAJ99960.1, BAJ90772.1, CAA25115.1, YP_874650.1, BAK03346.1, BAJ87942.1, BAJ88600.1, BAJ86032.1, BAJ90134.1, BAJ90399.1, BAK06252.1, BAJ88386.1, BAJ86704.1, sp|P52711.1|CBP23_HORVU, BAJ93200.1, BAJ92472.1, BAK00041.1, BAJ88371.1, BAJ91130.1
3	GO:0006807	nitrogen compound metabolic process	Biological Process	GO:0008152	metabolic process	7.75	19	AGP50751.1, BAJ99960.1, BAJ90772.1, CAA25115.1, YP_874650.1, BAJ87942.1, BAJ88600.1, BAJ86032.1, BAJ90134.1, BAJ90399.1, BAK06252.1, BAJ88386.1, BAJ86704.1, sp|P52711.1|CBP23_HORVU, BAJ93200.1, BAJ92472.1, BAK00041.1, BAJ88371.1, BAJ91130.1
4	GO:0034641	cellular nitrogen compound metabolic process	Biological Process	GO:0006807, GO:0044237	nitrogen compound metabolic process, cellular metabolic process	6.65	15	AGP50751.1, BAJ99960.1, CAA25115.1, YP_874650.1, BAJ87942.1, BAJ88600.1, BAJ86032.1, BAJ90134.1, BAJ88386.1, BAJ86704.1, BAJ93200.1, BAJ92472.1, BAK00041.1, BAJ88371.1, BAJ91130.1
3	GO:0009058	biosynthetic process	Biological Process	GO:0008152	metabolic process	14.08	13	AGP50751.1, BAJ99960.1, CBL76025.1, CAA25115.1, YP_874650.1, BAJ87942.1, BAJ88600.1, BAJ86032.1, BAJ86704.1, BAJ91934.1, BAJ92472.1, BAK00041.1, CAA63139.1
2	GO:0050896	response to stimulus	Biological Process	GO:0008150	biological_process	10.2	10	AFV67833.1, BAK01637.1, BAJ96657.1, BAJ91305.1, BAJ86109.1, BAJ93200.1, BAJ87607.1, BAB62533.1, BAJ91673.1, CBD34112.1
4	GO:0006725	cellular aromatic compound metabolic process	Biological Process	GO:0044237	cellular metabolic process	6	10	AGP50751.1, BAJ99960.1, BAJ88386.1, CAA25115.1, YP_874650.1, BAJ93200.1, BAJ87942.1, BAJ88371.1, BAJ91130.1, BAJ90134.1
4	GO:1901360	organic cyclic compound metabolic process	Biological Process	GO:0071704	organic substance metabolic process	6	10	AGP50751.1, BAJ99960.1, BAJ88386.1, CAA25115.1, YP_874650.1, BAJ93200.1, BAJ87942.1, BAJ88371.1, BAJ91130.1, BAJ90134.1
4	GO:0006139	nucleobase-containing compound metabolic process	Biological Process	GO:0046483, GO:0006725, GO:0034641, GO:1901360, GO:0044238	heterocycle metabolic process, cellular aromatic compound metabolic process, cellular nitrogen compound metabolic process, organic cyclic compound metabolic process, primary metabolic process	10	10	AGP50751.1, BAJ99960.1, BAJ88386.1, CAA25115.1, YP_874650.1, BAJ93200.1, BAJ87942.1, BAJ88371.1, BAJ91130.1, BAJ90134.1
4	GO:0046483	heterocycle metabolic process	Biological Process	GO:0044237	cellular metabolic process	6	10	AGP50751.1, BAJ99960.1, BAJ88386.1, CAA25115.1, YP_874650.1, BAJ93200.1, BAJ87942.1, BAJ88371.1, BAJ91130.1, BAJ90134.1
4	GO:1901564	organonitrogen compound metabolic process	Biological Process	GO:0006807, GO:0071704	nitrogen compound metabolic process, organic substance metabolic process	6.91	9	BAJ90772.1, BAK06252.1, BAJ86704.1, sp|P52711.1|CBP23_HORVU, BAJ88600.1, BAJ86032.1, BAJ92472.1, BAK00041.1, BAJ90399.1
4	GO:0043170	macromolecule metabolic process	Biological Process	GO:0071704	organic substance metabolic process	7.63	9	BAJ90772.1, BAK06252.1, BAJ86704.1, sp|P52711.1|CBP23_HORVU, BAJ88600.1, BAJ86032.1, BAJ92472.1, BAK00041.1, BAJ90399.1
4	GO:0019538	protein metabolic process	Biological Process	GO:1901564, GO:0043170, GO:0044238	organonitrogen compound metabolic process, macromolecule metabolic process, primary metabolic process	11.52	9	BAJ90772.1, BAK06252.1, BAJ86704.1, sp|P52711.1|CBP23_HORVU, BAJ88600.1, BAJ86032.1, BAJ92472.1, BAK00041.1, BAJ90399.1
3	GO:0006950	response to stress	Biological Process	GO:0050896	response to stimulus	8	8	AFV67833.1, BAK01637.1, BAJ91305.1, BAJ86109.1, BAJ87607.1, BAB62533.1, BAJ91673.1, CBD34112.1
2	GO:0051179	localization	Biological Process	GO:0008150	biological_process	2.52	7	AGP50751.1, BAJ99960.1, CAA25115.1, BAJ95640.1, YP_874650.1, sp|Q40078.1|VATB1_HORVU, BAJ99489.1
3	GO:0009056	catabolic process	Biological Process	GO:0008152	metabolic process	7	7	BAJ93200.1, BAJ87607.1, BAJ91673.1, BAJ92712.1, BAJ88371.1, CBD34112.1, BAJ90134.1
3	GO:0042221	response to chemical	Biological Process	GO:0050896	response to stimulus	7	7	AFV67833.1, BAK01637.1, BAJ91305.1, BAJ87607.1, BAB62533.1, BAJ91673.1, CBD34112.1
3	GO:0051234	establishment of localization	Biological Process	GO:0051179	localization	4.2	7	AGP50751.1, BAJ99960.1, CAA25115.1, BAJ95640.1, YP_874650.1, sp|Q40078.1|VATB1_HORVU, BAJ99489.1
4	GO:0044260	cellular macromolecule metabolic process	Biological Process	GO:0044237, GO:0043170	cellular metabolic process, macromolecule metabolic process	2.52	7	BAJ90772.1, BAK06252.1, BAJ86704.1, BAJ88600.1, BAJ86032.1, BAJ92472.1, BAK00041.1
4	GO:0006091	generation of precursor metabolites and energy	Biological Process	GO:0044237	cellular metabolic process	7	7	BAJ99765.1, BAJ90772.1, ABL95205.1, BAJ88371.1, BAJ90134.1, BAJ90399.1, BAJ99688.1
4	GO:0006810	transport	Biological Process	GO:0051234	establishment of localization	7	7	AGP50751.1, BAJ99960.1, CAA25115.1, BAJ95640.1, YP_874650.1, sp|Q40078.1|VATB1_HORVU, BAJ99489.1
5	GO:0044267	cellular protein metabolic process	Biological Process	GO:0044260, GO:0019538	cellular macromolecule metabolic process, protein metabolic process	4.2	7	BAJ90772.1, BAK06252.1, BAJ86704.1, BAJ88600.1, BAJ86032.1, BAJ92472.1, BAK00041.1
3	GO:0071840	cellular component organization or biogenesis	Biological Process	GO:0009987	cellular process	3	5	BAJ96657.1, BAJ89162.1, BAJ93061.1, BAK00003.1, BAJ91888.1
4	GO:0016043	cellular component organization	Biological Process	GO:0071840	cellular component organization or biogenesis	5	5	BAJ96657.1, BAJ89162.1, BAJ93061.1, BAK00003.1, BAJ91888.1
4	GO:0044249	cellular biosynthetic process	Biological Process	GO:0044237, GO:0009058	cellular metabolic process, biosynthetic process	1.8	5	BAJ86704.1, BAJ88600.1, BAJ86032.1, BAJ92472.1, BAK00041.1
4	GO:1901576	organic substance biosynthetic process	Biological Process	GO:0071704, GO:0009058	organic substance metabolic process, biosynthetic process	1.08	5	BAJ86704.1, BAJ88600.1, BAJ86032.1, BAJ92472.1, BAK00041.1
5	GO:0034645	cellular macromolecule biosynthetic process	Biological Process	GO:0044260, GO:0009059, GO:0044249	cellular macromolecule metabolic process, macromolecule biosynthetic process, cellular biosynthetic process	3	5	BAJ86704.1, BAJ88600.1, BAJ86032.1, BAJ92472.1, BAK00041.1
5	GO:0009059	macromolecule biosynthetic process	Biological Process	GO:1901576, GO:0043170	organic substance biosynthetic process, macromolecule metabolic process	1.8	5	BAJ86704.1, BAJ88600.1, BAJ86032.1, BAJ92472.1, BAK00041.1
5	GO:0043603	cellular amide metabolic process	Biological Process	GO:0034641	cellular nitrogen compound metabolic process	1.08	5	BAJ86704.1, BAJ88600.1, BAJ86032.1, BAJ92472.1, BAK00041.1
5	GO:0010467	gene expression	Biological Process	GO:0043170	macromolecule metabolic process	3	5	BAJ86704.1, BAJ88600.1, BAJ86032.1, BAJ92472.1, BAK00041.1
5	GO:0044271	cellular nitrogen compound biosynthetic process	Biological Process	GO:0034641, GO:0044249	cellular nitrogen compound metabolic process, cellular biosynthetic process	1.08	5	BAJ86704.1, BAJ88600.1, BAJ86032.1, BAJ92472.1, BAK00041.1
5	GO:0006518	peptide metabolic process	Biological Process	GO:1901564, GO:0043603	organonitrogen compound metabolic process, cellular amide metabolic process	1.8	5	BAJ86704.1, BAJ88600.1, BAJ86032.1, BAJ92472.1, BAK00041.1
5	GO:1901566	organonitrogen compound biosynthetic process	Biological Process	GO:1901576, GO:1901564	organic substance biosynthetic process, organonitrogen compound metabolic process	1.8	5	BAJ86704.1, BAJ88600.1, BAJ86032.1, BAJ92472.1, BAK00041.1
6	GO:0043043	peptide biosynthetic process	Biological Process	GO:0043604, GO:1901566, GO:0006518	amide biosynthetic process, organonitrogen compound biosynthetic process, peptide metabolic process	3	5	BAJ86704.1, BAJ88600.1, BAJ86032.1, BAJ92472.1, BAK00041.1
6	GO:0043604	amide biosynthetic process	Biological Process	GO:0044271, GO:0043603	cellular nitrogen compound biosynthetic process, cellular amide metabolic process	1.8	5	BAJ86704.1, BAJ88600.1, BAJ86032.1, BAJ92472.1, BAK00041.1
6	GO:0006412	translation	Biological Process	GO:0034645, GO:0010467, GO:0044267, GO:0043043	cellular macromolecule biosynthetic process, gene expression, cellular protein metabolic process, peptide biosynthetic process	5	5	BAJ86704.1, BAJ88600.1, BAJ86032.1, BAJ92472.1, BAK00041.1
4	GO:0015979	photosynthesis	Biological Process	GO:0044237	cellular metabolic process	4	4	BAJ90772.1, BAK00826.1, ABL95205.1, BAJ90399.1
4	GO:0005975	carbohydrate metabolic process	Biological Process	GO:0071704, GO:0044238	organic substance metabolic process, primary metabolic process	3	3	BAK03346.1, BAJ88371.1, BAJ90134.1
5	GO:0043412	macromolecule modification	Biological Process	GO:0043170	macromolecule metabolic process	0.72	2	BAJ90772.1, BAK06252.1
5	GO:0036211	protein modification process	Biological Process	GO:0019538, GO:0043412	protein metabolic process, macromolecule modification	1.2	2	BAJ90772.1, BAK06252.1
6	GO:0006464	cellular protein modification process	Biological Process	GO:0036211, GO:0044267	protein modification process, cellular protein metabolic process	2	2	BAJ90772.1, BAK06252.1
2	GO:0032501	multicellular organismal process	Biological Process	GO:0008150	biological_process	0.6	1	BAK01637.1
2	GO:0065007	biological regulation	Biological Process	GO:0008150	biological_process	0.22	1	BAJ99765.1
2	GO:0032502	developmental process	Biological Process	GO:0008150	biological_process	0.36	1	BAK01637.1
3	GO:0007154	cell communication	Biological Process	GO:0009987	cellular process	1	1	BAJ93200.1
3	GO:0009605	response to external stimulus	Biological Process	GO:0050896	response to stimulus	1	1	BAJ93200.1
3	GO:0019725	cellular homeostasis	Biological Process	GO:0009987, GO:0042592	cellular process, homeostatic process	1	1	BAJ99765.1
3	GO:0007275	multicellular organism development	Biological Process	GO:0048856, GO:0032501	anatomical structure development, multicellular organismal process	1	1	BAK01637.1
3	GO:0065008	regulation of biological quality	Biological Process	GO:0065007	biological regulation	0.36	1	BAJ99765.1
3	GO:0048856	anatomical structure development	Biological Process	GO:0032502	developmental process	0.6	1	BAK01637.1
3	GO:0007049	cell cycle	Biological Process	GO:0009987	cellular process	1	1	BAJ91888.1
3	GO:0009628	response to abiotic stimulus	Biological Process	GO:0050896	response to stimulus	1	1	BAJ96657.1
4	GO:0042592	homeostatic process	Biological Process	GO:0065008	regulation of biological quality	0.6	1	BAJ99765.1

## Sheet: Data sheet 2C_GO_CC
Data sheet 2C. Gene ontology annotation of differentialy regulated proteins found between above ground parts of untreated WT and HvMPK3 KO lines according to cellular compartment
Level	GO ID	GO Name	GO Type	Parents (ACC)	Parents (Name)	Nodescore	#Seqs	Sequence Names
1	GO:0005575	cellular_component	Cellular Component			80.87	44	BAJ99765.1, AGP50751.1, CBL76025.1, CAA25115.1, BAJ90386.1, BAJ87987.1, BAJ88600.1, BAJ87575.1, BAJ99688.1, BAJ90134.1, AFV67833.1, BAJ88386.1, BAK00826.1, BAJ89162.1, BAJ93200.1, BAB62533.1, BAK00041.1, BAK00003.1, ABL95205.1, CAA63139.1, BAJ89870.1, BAJ99960.1, BAJ90772.1, YP_874650.1, BAJ94280.1, BAJ93061.1, BAJ99489.1, BAJ91673.1, BAJ86032.1, BAJ90399.1, BAJ96657.1, BAK05421.1, BAJ86704.1, BA…
2	GO:0110165	cellular anatomical entity	Cellular Component	GO:0005575	cellular_component	61.45	43	BAJ99765.1, AGP50751.1, CBL76025.1, CAA25115.1, BAJ90386.1, BAJ87987.1, BAJ88600.1, BAJ87575.1, BAJ99688.1, BAJ90134.1, AFV67833.1, BAJ88386.1, BAK00826.1, BAJ89162.1, BAJ93200.1, BAB62533.1, BAK00041.1, BAK00003.1, ABL95205.1, CAA63139.1, BAJ89870.1, BAJ99960.1, BAJ90772.1, YP_874650.1, BAJ94280.1, BAJ93061.1, BAJ99489.1, BAJ91673.1, BAJ86032.1, BAJ90399.1, BAJ96657.1, BAK05421.1, BAJ86704.1, BA…
3	GO:0005622	intracellular anatomical structure	Cellular Component	GO:0110165	cellular anatomical entity	60.72	34	AGP50751.1, CBL76025.1, CAA25115.1, BAJ90386.1, BAJ88600.1, BAJ87575.1, BAJ90134.1, BAJ99688.1, AFV67833.1, BAJ88386.1, BAK00826.1, BAJ93200.1, BAK00003.1, BAK00041.1, ABL95205.1, CAA63139.1, BAJ89870.1, BAJ90772.1, BAJ99960.1, YP_874650.1, BAJ93061.1, BAJ94280.1, BAJ99489.1, BAJ86032.1, BAJ90399.1, BAJ96657.1, BAJ86704.1, BAJ91305.1, BAJ90611.1, QDA21833.1, BAK06325.1, CBM36948.1, BAJ92472.1, BA…
3	GO:0043226	organelle	Cellular Component	GO:0110165	cellular anatomical entity	4.84	26	AGP50751.1, CBL76025.1, CAA25115.1, BAJ90386.1, BAJ88600.1, AFV67833.1, BAJ88386.1, BAK00826.1, BAJ93200.1, BAK00003.1, BAK00041.1, ABL95205.1, CAA63139.1, BAJ89870.1, BAJ90772.1, YP_874650.1, BAJ93061.1, BAJ99489.1, BAJ86032.1, BAJ90399.1, BAJ96657.1, BAJ86704.1, QDA21833.1, CBM36948.1, BAJ92472.1, BAJ91130.1
4	GO:0043229	intracellular organelle	Cellular Component	GO:0043226, GO:0005622	organelle, intracellular anatomical structure	8.06	26	AGP50751.1, CBL76025.1, CAA25115.1, BAJ90386.1, BAJ88600.1, AFV67833.1, BAJ88386.1, BAK00826.1, BAJ93200.1, BAK00041.1, BAK00003.1, ABL95205.1, CAA63139.1, BAJ89870.1, BAJ90772.1, YP_874650.1, BAJ93061.1, BAJ99489.1, BAJ86032.1, BAJ90399.1, BAJ96657.1, BAJ86704.1, QDA21833.1, CBM36948.1, BAJ92472.1, BAJ91130.1
3	GO:0005737	cytoplasm	Cellular Component	GO:0110165, GO:0005622	cellular anatomical entity, intracellular anatomical structure	33.08	23	AGP50751.1, BAJ90772.1, CBL76025.1, CAA25115.1, YP_874650.1, BAJ94280.1, BAJ99489.1, BAJ87575.1, BAJ90399.1, BAJ90134.1, AFV67833.1, BAJ96657.1, BAK00826.1, BAJ91305.1, BAJ90611.1, QDA21833.1, BAJ93200.1, CBM36948.1, BAK06325.1, ABL95205.1, CAA63139.1, BAJ89870.1, BAJ91130.1
4	GO:0043227	membrane-bounded organelle	Cellular Component	GO:0043226	organelle	5.46	19	AGP50751.1, BAJ90772.1, CBL76025.1, CAA25115.1, YP_874650.1, BAJ99489.1, BAJ90386.1, BAJ90399.1, AFV67833.1, BAJ96657.1, BAJ88386.1, BAK00826.1, QDA21833.1, BAJ93200.1, CBM36948.1, ABL95205.1, CAA63139.1, BAJ89870.1, BAJ91130.1
5	GO:0043231	intracellular membrane-bounded organelle	Cellular Component	GO:0043229, GO:0043227	intracellular organelle, membrane-bounded organelle	9.1	19	AGP50751.1, BAJ90772.1, CBL76025.1, CAA25115.1, YP_874650.1, BAJ99489.1, BAJ90386.1, BAJ90399.1, AFV67833.1, BAJ96657.1, BAJ88386.1, BAK00826.1, QDA21833.1, BAJ93200.1, CBM36948.1, ABL95205.1, CAA63139.1, BAJ89870.1, BAJ91130.1
3	GO:0016020	membrane	Cellular Component	GO:0110165	cellular anatomical entity	17.2	16	BAJ99765.1, AGP50751.1, BAJ99960.1, BAJ90772.1, CAA25115.1, YP_874650.1, BAJ99489.1, BAJ99688.1, BAK05421.1, BAJ96657.1, BAK00826.1, BAJ89162.1, sp|Q40078.1|VATB1_HORVU, BAB62533.1, ABL95205.1, BAJ89870.1
4	GO:0009536	plastid	Cellular Component	GO:0005737, GO:0043231	cytoplasm, intracellular membrane-bounded organelle	7.8	13	AGP50751.1, BAJ90772.1, CAA25115.1, YP_874650.1, BAJ90399.1, AFV67833.1, BAJ96657.1, BAK00826.1, QDA21833.1, BAJ93200.1, ABL95205.1, CAA63139.1, BAJ91130.1
5	GO:0009507	chloroplast	Cellular Component	GO:0009536	plastid	13	13	AGP50751.1, BAJ90772.1, CAA25115.1, YP_874650.1, BAJ90399.1, AFV67833.1, BAJ96657.1, BAK00826.1, QDA21833.1, BAJ93200.1, ABL95205.1, CAA63139.1, BAJ91130.1
3	GO:0009579	thylakoid	Cellular Component	GO:0110165, GO:0005622	cellular anatomical entity, intracellular anatomical structure	8	8	AGP50751.1, BAJ90772.1, BAJ96657.1, BAK00826.1, CAA25115.1, YP_874650.1, ABL95205.1, BAJ90399.1
4	GO:0043228	non-membrane-bounded organelle	Cellular Component	GO:0043226	organelle	2.52	7	BAJ86704.1, BAJ93061.1, BAJ88600.1, BAJ86032.1, BAJ92472.1, BAK00041.1, BAK00003.1
5	GO:0043232	intracellular non-membrane-bounded organelle	Cellular Component	GO:0043229, GO:0043228	intracellular organelle, non-membrane-bounded organelle	4.2	7	BAJ86704.1, BAJ93061.1, BAJ88600.1, BAJ86032.1, BAJ92472.1, BAK00041.1, BAK00003.1
3	GO:0005576	extracellular region	Cellular Component	GO:0110165	cellular anatomical entity	5	5	BAJ89162.1, BAJ87987.1, BAJ87607.1, BAJ91673.1, CBD34112.1
6	GO:0005840	ribosome	Cellular Component	GO:0043232	intracellular non-membrane-bounded organelle	5	5	BAJ86704.1, BAJ88600.1, BAJ86032.1, BAJ92472.1, BAK00041.1
3	GO:0005829	cytosol	Cellular Component	GO:0005737, GO:0110165	cytoplasm, cellular anatomical entity	4	4	QDA21833.1, BAJ94280.1, CAA63139.1, BAJ90134.1
4	GO:0005739	mitochondrion	Cellular Component	GO:0005737, GO:0043231	cytoplasm, intracellular membrane-bounded organelle	4	4	CBL76025.1, YP_874650.1, BAJ99489.1, BAJ89870.1
3	GO:0071944	cell periphery	Cellular Component	GO:0110165	cellular anatomical entity	1.56	3	BAK05421.1, YP_874650.1, BAJ89162.1
4	GO:0005886	plasma membrane	Cellular Component	GO:0016020, GO:0071944	membrane, cell periphery	2	2	BAK05421.1, YP_874650.1
6	GO:0005634	nucleus	Cellular Component	GO:0043231	intracellular membrane-bounded organelle	2.36	2	BAJ88386.1, BAJ90386.1
6	GO:0005856	cytoskeleton	Cellular Component	GO:0043232	intracellular non-membrane-bounded organelle	2	2	BAJ93061.1, BAK00003.1
3	GO:0012505	endomembrane system	Cellular Component	GO:0110165	cellular anatomical entity	0.6	1	CBM36948.1
3	GO:0030312	external encapsulating structure	Cellular Component	GO:0110165, GO:0071944	cellular anatomical entity, cell periphery	0.6	1	BAJ89162.1
3	GO:0005654	nucleoplasm	Cellular Component	GO:0031981, GO:0110165	nuclear lumen, cellular anatomical entity	1	1	BAJ88386.1
3	GO:0031974	membrane-enclosed lumen	Cellular Component	GO:0110165	cellular anatomical entity	0.13	1	BAJ88386.1
4	GO:0043233	organelle lumen	Cellular Component	GO:0043226, GO:0031974	organelle, membrane-enclosed lumen	0.22	1	BAJ88386.1
4	GO:0005618	cell wall	Cellular Component	GO:0030312	external encapsulating structure	1	1	BAJ89162.1
4	GO:0005783	endoplasmic reticulum	Cellular Component	GO:0012505, GO:0005737, GO:0043231	endomembrane system, cytoplasm, intracellular membrane-bounded organelle	1	1	CBM36948.1
5	GO:0070013	intracellular organelle lumen	Cellular Component	GO:0043233, GO:0043229	organelle lumen, intracellular organelle	0.36	1	BAJ88386.1
6	GO:0031981	nuclear lumen	Cellular Component	GO:0070013, GO:0005634	intracellular organelle lumen, nucleus	0.6	1	BAJ88386.1

## Sheet: Data sheet 2D_KEGG
Data sheet 2D. KEGG Pathway analysis of differentialy regulated proteins found between above ground parts of untreated WT and HvMPK3 KO lines
Pathway	Pathway ID	#Enzs in Pathway	Enzyme	#Seqs of Enzyme	Seqs
Glycolysis / Gluconeogenesis	map00010	2	ec:2.7.2.3 - kinase, ec:4.2.1.11 - hydratase	1, 1	BAJ88371.1, BAJ90134.1
Phenylpropanoid biosynthesis	map00940	1	ec:1.11.1.7 - lactoperoxidase	1	BAJ87607.1
Glutathione metabolism	map00480	1	ec:1.11.1.9 - peroxidase	1	BAK01637.1
C5-Branched dibasic acid metabolism	map00660	1	ec:1.1.1.85 - dehydrogenase	1	BAJ91934.1
Oxidative phosphorylation	map00190	1	ec:7.1.2.2 - two-sector ATPase	1	CAA25115.1
Various types of N-glycan biosynthesis	map00513	1	ec:3.2.1.52 - hexosaminidase	1	BAK03346.1
Sulfur metabolism	map00920	1	ec:2.5.1.47 - synthase	1	CBL76025.1
Riboflavin metabolism	map00740	1	ec:3.6.1.9 - diphosphatase	1	BAJ91130.1
Cyanoamino acid metabolism	map00460	1	ec:4.4.1.9 - synthase	1	CBL76025.1
Pantothenate and CoA biosynthesis	map00770	2	ec:3.6.1.9 - diphosphatase, ec:1.3.1.2 - dehydrogenase (NADP+)	1, 1	BAJ91130.1, BAJ93200.1
Photosynthesis	map00195	1	ec:7.1.2.2 - two-sector ATPase	1	CAA25115.1
Thiamine metabolism	map00730	1	ec:3.6.1.15 - phosphatase	3	BAJ91305.1, BAJ87342.1, YP_874650.1
Cysteine and methionine metabolism	map00270	1	ec:2.5.1.47 - synthase	1	CBL76025.1
Nicotinate and nicotinamide metabolism	map00760	1	ec:3.6.1.9 - diphosphatase	1	BAJ91130.1
Purine metabolism	map00230	3	ec:3.6.1.9 - diphosphatase, ec:3.6.1.15 - phosphatase, ec:3.1.7.2 - 3'-diphosphatase	1, 3, 1	BAJ91130.1, BAJ91305.1, BAJ87342.1, YP_874650.1, BAJ91130.1
beta-Alanine metabolism	map00410	1	ec:1.3.1.2 - dehydrogenase (NADP+)	1	BAJ93200.1
Glycosaminoglycan degradation	map00531	1	ec:3.2.1.52 - hexosaminidase	1	BAK03346.1
Valine, leucine and isoleucine biosynthesis	map00290	1	ec:1.1.1.85 - dehydrogenase	1	BAJ91934.1
Glycosphingolipid biosynthesis - ganglio series	map00604	1	ec:3.2.1.52 - hexosaminidase	1	BAK03346.1
Starch and sucrose metabolism	map00500	1	ec:3.6.1.9 - diphosphatase	1	BAJ91130.1
Carbon fixation in photosynthetic organisms	map00710	1	ec:2.7.2.3 - kinase	1	BAJ88371.1
Drug metabolism - other enzymes	map00983	1	ec:1.3.1.2 - dehydrogenase (NADP+)	1	BAJ93200.1
Glycosphingolipid biosynthesis - globo and isoglobo series	map00603	1	ec:3.2.1.52 - hexosaminidase	1	BAK03346.1
Arachidonic acid metabolism	map00590	1	ec:1.11.1.9 - peroxidase	1	BAK01637.1
Amino sugar and nucleotide sugar metabolism	map00520	1	ec:3.2.1.52 - hexosaminidase	1	BAK03346.1
Methane metabolism	map00680	1	ec:4.2.1.11 - hydratase	1	BAJ90134.1
Other glycan degradation	map00511	1	ec:3.2.1.52 - hexosaminidase	1	BAK03346.1
Porphyrin and chlorophyll metabolism	map00860	2	ec:4.2.1.24 - synthase, ec:1.14.14.18 - oxygenase (biliverdin-producing)	1, 1	CAA63139.1, BAJ92712.1
Pyrimidine metabolism	map00240	2	ec:3.6.1.9 - diphosphatase, ec:1.3.1.2 - dehydrogenase (NADP+)	1, 1	BAJ91130.1, BAJ93200.1

## Sheet: Data sheet 2E_Domains
Data sheet 2E. Evaluation of InterPro protein domains in protein sequences of differentialy regulated proteins found between above ground parts of untreated WT and Hv MPK3 KO lines.
IPS Domain	#Seqs
(IPR002016) Haem peroxidase	4	BAJ87607.1, BAB62533.1, BAJ91673.1, CBD34112.1
(IPR033905) Secretory peroxidase	3	BAJ87607.1, BAJ91673.1, CBD34112.1
(IPR004045) Glutathione S-transferase, N-terminal	3	BAJ99765.1, ALH06519.1, BAJ86721.1
(IPR000504) RNA recognition motif domain	3	BAJ88386.1, BAJ91532.1, BAJ87575.1
(IPR002108) Actin-depolymerising factor homology domain	2	BAJ93061.1, BAK00003.1
(IPR010987) Glutathione S-transferase, C-terminal-like	2	ALH06519.1, BAJ86721.1
(IPR014038) Translation elongation factor EF1B, beta/delta subunit, guanine nucleotide exchange domain	2	CAB90214.1, BAK06325.1
(IPR004100) ATPase, F1/V1/A1 complex, alpha/beta subunit, N-terminal domain	2	YP_874650.1, sp|Q40078.1|VATB1_HORVU
(IPR000194) ATPase, F1/V1/A1 complex, alpha/beta subunit, nucleotide-binding domain	2	YP_874650.1, sp|Q40078.1|VATB1_HORVU
(IPR001926) Pyridoxal-phosphate dependent enzyme	1	CBL76025.1
(IPR000782) FAS1 domain	1	BAK05421.1
(IPR011112) Rho termination factor, N-terminal	1	BAJ87942.1
(IPR002109) Glutaredoxin	1	BAJ99765.1
(IPR020547) ATP synthase delta/epsilon subunit, C-terminal domain	1	CAA25115.1
(IPR006843) Plastid lipid-associated protein/fibrillin conserved domain	1	BAK01334.1
(IPR041095) Elongation Factor G, domain II	1	BAJ87342.1
(IPR044034) Nascent polypeptide-associated complex subunit alpha-like, UBA domain	1	BAJ90611.1
(IPR002715) Nascent polypeptide-associated complex NAC domain	1	BAJ90611.1
(IPR005720) Dihydroorotate dehydrogenase domain	1	BAJ93200.1
(IPR010357) Domain of unknown function DUF953, thioredoxin-like	1	BAJ94490.1
(IPR015310) Activator of Hsp90 ATPase, N-terminal	1	BAJ94280.1
(IPR025131) Domain of unknown function DUF4057	1	BAJ86779.1
(IPR017896) 4Fe-4S ferredoxin-type, iron-sulphur binding domain	1	ABL95205.1
(IPR015883) Glycoside hydrolase family 20, catalytic domain	1	BAK03346.1
(IPR001199) Cytochrome b5-like heme/steroid binding domain	1	BAJ99688.1
(IPR002477) Peptidoglycan binding-like	1	BAJ86305.1
(IPR001662) Elongation factor 1B gamma, C-terminal	1	ALH06519.1
(IPR018392) LysM domain	1	BAJ92081.1
(IPR004161) Translation elongation factor EFTu-like, domain 2	1	BAJ87342.1
(IPR018967) Iron sulphur-containing domain, CDGSH-type	1	BAJ89870.1
(IPR032838) VWA-Hint protein, Vwaint domain	1	BAK02953.1
(IPR000793) ATP synthase, alpha subunit, C-terminal	1	YP_874650.1
(IPR029019) Beta-hexosaminidase, eukaryotic type, N-terminal	1	BAK03346.1
(IPR033732) ATP synthase, F1 complex, alpha subunit nucleotide-binding domain	1	YP_874650.1
(IPR004046) Glutathione S-transferase, C-terminal	1	ALH06519.1
(IPR008998) Agglutinin domain	1	BAJ87987.1
(IPR002035) von Willebrand factor, type A	1	BAK02953.1
(IPR001932) PPM-type phosphatase domain	1	BAK06252.1
(IPR022017) Domain of unknown function DUF3598	1	BAJ91888.1
(IPR000795) Translational (tr)-type GTP-binding domain	1	BAJ87342.1
(IPR020476) NUDIX hydrolase	1	BAJ91130.1
(IPR020683) Ankyrin repeat-containing domain	1	BAJ89531.1
(IPR005517) Translation elongation factor EFG/EF2, domain IV	1	BAJ87342.1
(IPR024084) Isopropylmalate dehydrogenase-like domain	1	BAJ91934.1
(IPR002004) Polyadenylate-binding protein/Hyperplastic disc protein	1	BAJ87575.1
(IPR023798) Ribosomal protein S7 domain	1	BAJ86032.1
(IPR020546) ATP synthase, F1 complex, delta/epsilon subunit, N-terminal	1	CAA25115.1
(IPR020810) Enolase, C-terminal TIM barrel domain	1	BAJ90134.1
(IPR001739) Methyl-CpG DNA binding	1	BAJ91195.1
(IPR001424) Superoxide dismutase, copper/zinc binding domain	1	AFV67833.1
(IPR006196) RNA-binding domain, S1, IF1 type	1	QDA21833.1
(IPR000640) Elongation factor EFG, domain V-like	1	BAJ87342.1
(IPR000086) NUDIX hydrolase domain	1	BAJ91130.1
(IPR003614) Knottin, scorpion toxin-like	1	BAJ86109.1
(IPR020811) Enolase, N-terminal	1	BAJ90134.1
