# Supplementary material for: TALEN-Based HvMPK3 Knock-Out Attenuates Proteome and Root Hair Phenotypic Responses to flg22 in Barley
Source: Front Plant Sci. 2021 Apr 29;12:666229. doi: 10.3389/fpls.2021.666229 (PMC8117018; doi:10.3389/fpls.2021.666229)
Supplement: Supplementary Data Sheet 3 — Phosphopeptides detected in the proteomes of untreated wild type and HvMPK3 KO line roots and leaves. [file Data_Sheet_3.xlsx]

## Sheet: Datasheet 3
Data sheet 3. Phosphopeptides detected in the proteomes of untreated wild type and HvMPK3 KO line roots and leaves. Proteins with phosphopeptides identified in at least 2 biological replicates are listed.
Sample	Accession	Description	Sum PEP Score	Coverage	# Peptides	# Unique Peptides	Peptide(s) in WT	Modification(s) in WT	Peptide(s) in HvMPK3 KO	Modification(s) in HvMPK3 KO
ROOTS Wild type	326502638	PER52 Peroxidase 52 (Arabidopsis thaliana OX=3702)"	34.669	36.9565	9	8	NLsPRDmTALSGAHTIGR	S3(Phospho); M7(Oxidation)	N.d.	N.d.
	326494024	ACT1 Actin-1 (Oryza sativa subsp. japonica OX=39947)"	25.276	28.6472	7	3	TssSVEKSYELPDGQVITIGSER	S2(Phospho); S3(Phospho)	TssSVEKSYELPDGQVITIGAER	S2(Phospho); S3(Phospho)
									TSssVEKSYELPDGQVITIGAER	S3(Phospho); S4(Phospho)
									tSSSVEKsYELPDGQVITIGAER	T1(Phospho); S8(Phospho)
									TSSsVEKsYELPDGQVITIGAER	S4(Phospho); S8(Phospho)
	326493522	Phosphoglycerate kinase, cytosolic (Triticum aestivum OX=4565)"	14.026	22.4439	6	2	LADITAQGVTtIIGGGDSVAAVEK	T11(Phospho)	N.d.	N.d.
	326522841	FBA5 Fructose-bisphosphate aldolase 5, cytosolic (Arabidopsis thaliana OX=3702)"	6.735	6.11111	3	1	YIAtPGKGILAADESTGTIGKR	T4(Phospho)	N.d.	N.d.
							yIATPGKGILAADESTGTIGKR	Y1(Phospho)	N.d.	N.d.
	326505528	MIC60 MICOS complex subunit MIC60 (Lodderomyces elongisporus (strain ATCC 11503 / CBS 2605 / JCM 1781 / NBRC 1676 / NRRL YB-4239) OX=379508)"	7.41	6.44628	3	3	QsHsVHKLALGTLAFEEALSSGSPIR	S2(Phospho); S4(Phospho)	N.d.	N.d.
Shoots Wild type	326526529	"Protein of unknown function"	50.59	42.5703	11	11	tLLDMVERNELNMSILTLLDENIGSAK	T1(Phospho)	RAVANKIscIGWDPEGILAPPQPGHIAR	S8(Phospho); C9(Carbamidomethyl)
									tLLDMVERNELNMSILTLLDENIGSAK	T1(Phospho)
	326490876	TL20.3 Thylakoid lumenal protein TL20.3, chloroplastic (Arabidopsis thaliana OX=3702)"	44.175	44.9438	8	8	yEADQRGEFGIGSAAQFGNADLK	Y1(Phospho)	N.d.	N.d.
	263935	CW21=non-specific lipid transfer protein [barley, cv. Bomi, leaves, Peptide, 90 aa]	24.318	47.7778	2	2	AAGIPSMCGVsVPYAISASVDcSK	S11(Phospho); C22(Carbamidomethyl)	AAGIPSMCGVsVPYAISASVDcSK	S11(Phospho); C22(Carbamidomethyl)
	326509461	PETF Ferredoxin, chloroplastic (Triticum aestivum OX=4565)"	14.906	89.011	3	3	LVTPEGEVELEVPDDVyILDQAEEEGIDLPYSCR	Y17(Phospho)	LVTPEGEVELEVPDDVyILDQAEEEGIDLPYSCR	Y17(Phospho)
	326513848	BP-73 SAP-like protein BP-73 (Oryza sativa subsp. japonica OX=39947)"	7.406	8.95141	3	3	sKPFQERDDSENNDEFDSDTVSSK	S1(Phospho)	sKPFQERDDSENNDEFDSDTVSSK	S1(Phospho)

## Sheet: ROOT WT_replicate 1
Phosphopeptides detected in the proteome of untreated wild type roots - replicate 1.
Protein FDR Confidence	Master	Accession	Description	Exp. q-value	Sum PEP Score	Coverage	# Peptides	# PSMs	# Unique Peptides	# Protein Groups	# AAs	MW [kDa]	calc. pI	Score Sequest HT	# Peptides Sequest HT
High	Master Protein	326502638	Name:"Similar to PER52 Peroxidase 52 (Arabidopsis thaliana OX=3702)"	0	34.669	36.9565	9	24	8	1	322	34.1	9.39	73.52	9
	Confidence	Identifying Node	PSM Ambiguity	Annotated Sequence	Modifications	# Protein Groups	# Proteins	Master Protein Accessions	Protein Accessions	# Missed Cleavages	Charge	DeltaScore	DeltaCn	Rank	Search Engine Rank	m/z [Da]	MH+ [Da]	Theo. MH+ [Da]	DeltaM [ppm]	Deltam/z [Da]	Intensity	Activation Type	MS Order	Isolation Interference [%]	Ion Inject Time [ms]	RT [min]	First Scan	Spectrum File	XCorr	Percolator q-Value	Percolator PEP
	High	Sequest HT (A11)	Unambiguous	ATVScADILALAAR	C5(Carbamidomethyl)	1	1	326502638	326502638	0	3	0.2238	0	1	1	477.92	1431.75	1431.76	-11.63	-0.00555	168081	CID (Collision Induced Dissociation)	MS2		5.76	64.2057	22220	R_DC_WT_A.raw	2.86	0.0003239	0.007507
	High	Sequest HT (A11)	Selected	ATVScADILALAAR	C5(Carbamidomethyl)	1	1	326502638	326502638	0	2	0.0206	0	1	1	717.425	1433.84	1431.76	1452.6	1.03989	410067	CID (Collision Induced Dissociation)	MS2		3.831	64.2879	22251	R_DC_WT_A.raw	2.91	0.004213	0.06515
	High	Sequest HT (A11)	Unambiguous	SGGGSSLAPLDAQTADGFDNAYYR		1	1	326502638	326502638	0	3	0.4079	0	1	1	811.51	2432.52	2433.1	-238.46	-0.1934	151875	CID (Collision Induced Dissociation)	MS2		6.017	61.7719	21286	R_DC_WT_A.raw	3.8	0	0.001837
	High	Sequest HT (A11)	Unambiguous	SGGGSSLAPLDAQTADGFDNAYYR		1	1	326502638	326502638	0	2	0.5258	0	1	1	1217.43	2433.86	2433.1	314.92	0.38311	102445	CID (Collision Induced Dissociation)	MS2		25.657	61.5059	21185	R_DC_WT_A.raw	5.04	0	1.279e-06
	High	Sequest HT (A11)	Unambiguous	SGGGSSLAPLDAQTADGFDNAYYR		1	1	326502638	326502638	0	3	0.0532	0	1	1	812.177	2434.52	2433.1	583.55	0.47328	125518	CID (Collision Induced Dissociation)	MS2		7.261	61.342	21122	R_DC_WT_A.raw	2.63	0.0008073	0.01551
	High	Sequest HT (A11)	Unambiguous	GFDVIDAIK		1	1	326502638	326502638	0	2	0.3123	0	1	1	488.254	975.5	977.53	-2076.88	-1.01511	104272	CID (Collision Induced Dissociation)	MS2		2.38	60.1468	20660	R_DC_WT_A.raw	2.53	0	0.006385
	High	Sequest HT (A11)	Unambiguous	GFDVIDAIK		1	1	326502638	326502638	0	2	0.3361	0	1	1	489.337	977.667	977.53	139.63	0.06825	944240	CID (Collision Induced Dissociation)	MS2		1.374	60.0698	20630	R_DC_WT_A.raw	2.44	0.0008073	0.01346
	High	Sequest HT (A11)	Selected	GFDVIDAIK		1	1	326502638	326502638	0	2	0.0185	0	1	1	489.92	978.833	977.53	1333.14	0.65159	117358	CID (Collision Induced Dissociation)	MS2		11.947	61.5725	21209	R_DC_WT_A.raw	1.62	0.001499	0.04496
	High	Sequest HT (A11)	Unambiguous	ATVScADILALAAR	C5(Carbamidomethyl)	1	1	326502638	326502638	0	3	0.2551	0	1	1	477.253	1429.75	1431.76	-1408.54	-0.67223	64860.2	CID (Collision Induced Dissociation)	MS2		7.222	64.3646	22281	R_DC_WT_A.raw	2.47	0.001499	0.04927
	High	Sequest HT (A11)	Unambiguous	QYSSSPGQFSADFVTAMLK		1	1	326502638	326502638	0	2	0.1654	0	1	1	1032.6	2064.19	2063.97	103.42	0.10673	42280.1	CID (Collision Induced Dissociation)	MS2		44.652	85.5054	30058	R_DC_WT_A.raw	2.54	0.001499	0.04243
	High	Sequest HT (A11)	Unambiguous	QYSSSPGQFSADFVTAMLK		1	1	326502638	326502638	0	3	0.282	0	1	1	689.424	2066.26	2063.97	1106.49	0.76126	42217.8	CID (Collision Induced Dissociation)	MS2		22.545	83.7888	29465	R_DC_WT_A.raw	3.83	0	0.006207
	High	Sequest HT (A11)	Unambiguous	DGVNLLGGPTWSVPLGR		1	1	326502638	326502638	0	2	0.113	0	1	1	869.094	1737.18	1737.93	-429.73	-0.37342	98102.4	CID (Collision Induced Dissociation)	MS2		26.581	83.538	29378	R_DC_WT_A.raw	2.39	0.0008073	0.01757
	High	Sequest HT (A11)	Unambiguous	QYSSSPGQFSADFVTAMLK		1	1	326502638	326502638	0	2	0.5126	0	1	1	1032.51	2064.02	2063.97	22.67	0.0234	40486.1	CID (Collision Induced Dissociation)	MS2		50	83.4067	29334	R_DC_WT_A.raw	3.57	0	4.625e-05
	High	Sequest HT (A11)	Unambiguous	DGVNLLGGPTWSVPLGR		1	1	326502638	326502638	0	2	0.4584	0	1	1	870.011	1739.01	1737.93	625.19	0.54326	22461.8	CID (Collision Induced Dissociation)	MS2		50	83.3666	29320	R_DC_WT_A.raw	4.21	0	0.002119
	High	Sequest HT (A11)	Unambiguous	ATVScADILALAAR	C5(Carbamidomethyl)	1	1	326502638	326502638	0	2	0.255	0	1	1	717.425	1433.84	1431.76	1452.6	1.03989	234372	CID (Collision Induced Dissociation)	MS2		2.446	64.3331	22268	R_DC_WT_A.raw	4.47	0	0.0001851
	High	Sequest HT (A11)	Unambiguous	ATVScADILALAAR	C5(Carbamidomethyl)	1	1	326502638	326502638	0	2	0.4184	0	1	1	715.841	1430.68	1431.76	-759.17	-0.54347	654228	CID (Collision Induced Dissociation)	MS2		2.775	64.5871	22366	R_DC_WT_A.raw	2.94	0	0.0002106
	High	Sequest HT (A11)	Unambiguous	ATVScADILALAAR	C5(Carbamidomethyl)	1	1	326502638	326502638	0	2	0.4647	0	1	1	716.425	1431.84	1431.76	55.69	0.03987	571728	CID (Collision Induced Dissociation)	MS2		2.309	64.3804	22286	R_DC_WT_A.raw	4.11	0	0.000717
	High	Sequest HT (A11)	Unambiguous	DMTALSGAHTIGR		1	1	326502638	326502638	0	2	0.4789	0	1	1	665.424	1329.84	1329.66	137.05	0.09112	383011	CID (Collision Induced Dissociation)	MS2		3.63	31.1972	9347	R_DC_WT_A.raw	3.55	0	0.0004257
	High	Sequest HT (A11)	Unambiguous	DMTALSGAHTIGR		1	1	326502638	326502638	0	2	0.119	0	1	1	666.424	1331.84	1329.66	1641.23	1.09114	226219	CID (Collision Induced Dissociation)	MS2		4.091	30.7348	9167	R_DC_WT_A.raw	2.52	0.0008073	0.01731
	High	Sequest HT (A11)	Unambiguous	NLsPRDmTALSGAHTIGR	S3(Phospho); M7(Oxidation)	1	1	326502638	326502638	1	3	0.0951	0	1	1	665.424	1994.26	1992.93	664.62	0.44152	383011	CID (Collision Induced Dissociation)	MS2		3.63	31.1972	9347	R_DC_WT_A.raw	2.84	0.00126	0.02275
	High	Sequest HT (A11)	Unambiguous	MGASILR		4	5	326519130; 326527949; 326502638; 326530424	326519130; 326527949; 326502638; 326511186; 326530424	0	2	0.1304	0	1	2	374.335	747.662	747.418	326.58	0.12205	728414	CID (Collision Induced Dissociation)	MS2		1.225	25.2561	7022	R_DC_WT_A.raw	2.3	0.00171	0.05069
	High	Sequest HT (A11)	Unambiguous	SGMTSALQTER		1	1	326502638	326502638	0	2	0.3146	0	1	1	591.339	1181.67	1180.56	938.53	0.554	240529	CID (Collision Induced Dissociation)	MS2		4.684	23.4702	6326	R_DC_WT_A.raw	3.02	0	0.003442
	High	Sequest HT (A11)	Unambiguous	SGMTSALQTER		1	1	326502638	326502638	0	2	0.15	0	1	1	591.756	1182.5	1180.56	1644.43	0.97067	284508	CID (Collision Induced Dissociation)	MS2		1.572	22.5422	5961	R_DC_WT_A.raw	2.4	0.005271	0.07276
	High	Sequest HT (A11)	Unambiguous	SGMTSALQTER		1	1	326502638	326502638	0	2	0.25	0	1	1	590.506	1180	1180.56	-473.25	-0.27935	216032	CID (Collision Induced Dissociation)	MS2		6.282	22.0267	5766	R_DC_WT_A.raw	2.52	0.0008073	0.01809
High	Master Protein	326494024	Name:"Similar to ACT1 Actin-1 (Oryza sativa subsp. japonica OX=39947)"	0	25.276	28.6472	7	14	3	1	377	41.8	5.49	44.73	7
	Confidence	Identifying Node	PSM Ambiguity	Annotated Sequence	Modifications	# Protein Groups	# Proteins	Master Protein Accessions	Protein Accessions	# Missed Cleavages	Charge	DeltaScore	DeltaCn	Rank	Search Engine Rank	m/z [Da]	MH+ [Da]	Theo. MH+ [Da]	DeltaM [ppm]	Deltam/z [Da]	Intensity	Activation Type	MS Order	Isolation Interference [%]	Ion Inject Time [ms]	RT [min]	First Scan	Spectrum File	XCorr	Percolator q-Value	Percolator PEP
	High	Sequest HT (A11)	Unambiguous	TssSVEKSYELPDGQVITIGSER	S2(Phospho); S3(Phospho)	1	1	326494024	326494024	1	3	0.081	0	1	1	882.428	2645.27	2642.16	1175.49	1.03528	306403	CID (Collision Induced Dissociation)	MS2		4.119	64.1467	22197	R_DC_WT_A.raw	2.84	0	0.004922
	High	Sequest HT (A11)	Unambiguous	SYELPDGQVITIGSER		1	1	326494024	326494024	0	2	0.559	0	1	1	882.428	1763.85	1763.88	-18.39	-0.01622	306403	CID (Collision Induced Dissociation)	MS2		4.119	64.1467	22197	R_DC_WT_A.raw	4.49	0	5.221e-06
	High	Sequest HT (A11)	Unambiguous	SYELPDGQVITIGSER		1	1	326494024	326494024	0	2	0.4194	0	1	1	882.928	1764.85	1763.88	548.56	0.48379	190743	CID (Collision Induced Dissociation)	MS2		3.669	63.7711	22053	R_DC_WT_A.raw	4.34	0	2.77e-05
	High	Sequest HT (A11)	Unambiguous	LSYIALDYDQEMETSK		1	2	326494024	326501816; 326494024	0	2	0.5436	0	1	1	953.763	1906.52	1905.88	335.48	0.31969	96042.5	CID (Collision Induced Dissociation)	MS2		14.278	61.9621	21359	R_DC_WT_A.raw	5.28	0	1.965e-05
	High	Sequest HT (A11)	Unambiguous	SYELPDGQVITIGSER		1	1	326494024	326494024	0	2	0.1493	0	1	1	881.511	1762.02	1763.88	-1057.78	-0.9329	113269	CID (Collision Induced Dissociation)	MS2		13.294	64.3193	22264	R_DC_WT_A.raw	2.21	0.001402	0.02855
	High	Sequest HT (A11)	Unambiguous	SYELPDGQVITIGSER		1	1	326494024	326494024	0	2	0.0861	0	1	1	883.428	1765.85	1763.88	1115.5	0.9838	101968	CID (Collision Induced Dissociation)	MS2		16.079	65.5673	22742	R_DC_WT_A.raw	2.09	0.009313	0.1199
	High	Sequest HT (A11)	Unambiguous	TTGIVLDSGDGVSHTVPIYEGYALPHAILR		3	6	326516786; 326494024; 326495636	326501816; 326516786; 326516064; 326494024; 326490788; 326495636	0	3	0.2023	0	1	1	1051.76	3153.28	3151.64	519.36	0.54561	56707.5	CID (Collision Induced Dissociation)	MS2		26.712	71.9197	25161	R_DC_WT_A.raw	3.41	0.0003239	0.008458
	High	Sequest HT (A11)	Unambiguous	GYSFTTTAER		4	11	326516786; 326488133; 326494024; 326495636	326501816; 326516786; 326488133; 326530362; 326494024; 326490788; 326495636; 326524317; 326502758; 326529133; 326521830	0	2	0.5	0	1	1	566.755	1132.5	1132.53	-21.09	-0.01194	679225	CID (Collision Induced Dissociation)	MS2		1.288	26.7826	7617	R_DC_WT_A.raw	2.74	0.0003239	0.00722
	High	Sequest HT (A11)	Unambiguous	GYSFTTTAER		4	11	326516786; 326488133; 326494024; 326495636	326501816; 326516786; 326488133; 326530362; 326494024; 326490788; 326495636; 326524317; 326502758; 326529133; 326521830	0	2	0.4495	0	1	1	567.255	1133.5	1132.53	861.91	0.48807	831573	CID (Collision Induced Dissociation)	MS2		1.003	26.7802	7616	R_DC_WT_A.raw	2.18	0.0008073	0.01352
	High	Sequest HT (A11)	Unambiguous	EITALAPSSMK		4	6	326516786; 326494024; 326495636; 1540331568	326501816; 326516786; 326516064; 326494024; 326495636; 1540331568	0	1	0.5487	0	1	1	1147.68	1147.68	1147.6	69.99	0.08033	112675	CID (Collision Induced Dissociation)	MS2		21.751	35.1063	10869	R_DC_WT_A.raw	2.77	0	0.001089
	High	Sequest HT (A11)	Unambiguous	VAPEEHPVLLTEAPLNPK		3	9	326516786; 326494024; 326495636	326501816; 326516786; 326516064; 326530362; 326494024; 326495636; 326524317; 326529133; 326521830	0	3	0.0556	0	1	1	651.673	1953.01	1954.06	-541.72	-0.35285	225731	CID (Collision Induced Dissociation)	MS2		2.309	48.3898	16060	R_DC_WT_A.raw	2.52	0.00404	0.06416
	High	Sequest HT (A11)	Unambiguous	VAPEEHPVLLTEAPLNPK		3	9	326516786; 326494024; 326495636	326501816; 326516786; 326516064; 326530362; 326494024; 326495636; 326524317; 326529133; 326521830	0	3	0.2987	0	1	1	652.34	1955.01	1954.06	481.81	0.31383	900618	CID (Collision Induced Dissociation)	MS2		1.254	47.9312	15879	R_DC_WT_A.raw	3.85	0	0.002861
	High	Sequest HT (A11)	Unambiguous	VAPEEHPVLLTEAPLNPK		3	9	326516786; 326494024; 326495636	326501816; 326516786; 326516064; 326530362; 326494024; 326495636; 326524317; 326529133; 326521830	0	2	0.5272	0	1	1	977.513	1954.02	1954.06	-23.27	-0.02274	185923	CID (Collision Induced Dissociation)	MS2		6.724	47.0389	15531	R_DC_WT_A.raw	3.68	0.0003239	0.009149
	High	Sequest HT (A11)	Unambiguous	EITALAPSSMK		4	6	326516786; 326494024; 326495636; 1540331568	326501816; 326516786; 326516064; 326494024; 326495636; 1540331568	0	2	0.4231	0	1	1	574.339	1147.67	1147.6	58.61	0.03363	1.19524e+06	CID (Collision Induced Dissociation)	MS2		1.282	34.9374	10802	R_DC_WT_A.raw	2.34	0.003461	0.06022
High	Master Protein	326516502	Name:"Similar to FQR1 NAD(P)H dehydrogenase (quinone) FQR1 (Arabidopsis thaliana OX=3702)"	0	20.873	45.5882	7	13	6	1	204	21.8	6.7	38.59	7
	Confidence	Identifying Node	PSM Ambiguity	Annotated Sequence	Modifications	# Protein Groups	# Proteins	Master Protein Accessions	Protein Accessions	# Missed Cleavages	Charge	DeltaScore	DeltaCn	Rank	Search Engine Rank	m/z [Da]	MH+ [Da]	Theo. MH+ [Da]	DeltaM [ppm]	Deltam/z [Da]	Intensity	Activation Type	MS Order	Isolation Interference [%]	Ion Inject Time [ms]	RT [min]	First Scan	Spectrum File	XCorr	Percolator q-Value	Percolator PEP
	High	Sequest HT (A11)	Unambiguous	GASSVEGVEVK		1	1	326516502	326516502	0	1	0.3182	0	1	1	1062.01	1062.01	1061.55	440.31	0.46741	144395	CID (Collision Induced Dissociation)	MS2		24.925	19.3666	4750	R_DC_WT_A.raw	1.98	0.001499	0.03459
	High	Sequest HT (A11)	Unambiguous	AFFDATGGLWR		1	2	326516502	326512488; 326516502	0	2	0.3191	0	1	1	621.256	1241.51	1240.61	720.79	0.44711	81369.6	CID (Collision Induced Dissociation)	MS2		17.402	71.8524	25135	R_DC_WT_A.raw	2.57	0	0.001329
	High	Sequest HT (A11)	Unambiguous	TDVPVISPQELAEADGVLFGFPTR		1	1	326516502	326516502	0	3	0.4004	0	1	1	854.177	2560.52	2558.31	861.47	0.73464	20400.7	CID (Collision Induced Dissociation)	MS2		50	97.9378	34200	R_DC_WT_A.raw	4.82	0	0.000203
	High	Sequest HT (A11)	Unambiguous	VQGGSPYGAGTFAGDGSR		1	1	326516502	326516502	0	2	0.438	0	1	1	841.427	1681.85	1683.77	-1143.35	-0.96257	189214	CID (Collision Induced Dissociation)	MS2		12.868	31.1666	9336	R_DC_WT_A.raw	2.74	0	4.627e-05
	High	Sequest HT (A11)	Unambiguous	VQGGSPYGAGTFAGDGSR		1	1	326516502	326516502	0	2	0.5075	0	1	1	842.427	1683.85	1683.77	44.48	0.03745	227704	CID (Collision Induced Dissociation)	MS2		9.074	30.8458	9210	R_DC_WT_A.raw	3.98	0	8.972e-06
	High	Sequest HT (A11)	Selected	MFDMDKVQGGsPYGAGTFAGDGSR	S11(Phospho)	1	1	326516502	326516502	1	3		0.0262	2	2	843.094	2527.27	2531.04	-1489.41	-1.25658	196742	CID (Collision Induced Dissociation)	MS2		5.884	30.7967	9191	R_DC_WT_A.raw	2.6	0.001499	0.04474
	High	Sequest HT (A11)	Unambiguous	VQGGSPYGAGTFAGDGSR		1	1	326516502	326516502	0	2	0.4589	0	1	1	843.094	1685.18	1683.77	836.37	0.70413	196742	CID (Collision Induced Dissociation)	MS2		5.884	30.7967	9191	R_DC_WT_A.raw	4.14	0	4.078e-05
	High	Sequest HT (A11)	Unambiguous	VYVVYYSMYGHVAK		1	2	326516502	326512488; 326516502	0	2	0.3273	0	1	1	840.344	1679.68	1678.83	506.61	0.42526	215509	CID (Collision Induced Dissociation)	MS2		17.065	47.77	15818	R_DC_WT_A.raw	3.33	0	0.001549
	High	Sequest HT (A11)	Unambiguous	FGMMAAQMK		3	7	326496681; 326516502; 326532104	326508766; 326496681; 326488379; 326512488; 326516502; 326532104; 257667787	0	2	0.135	0	1	1	507.837	1014.67	1014.46	207.49	0.10524	445211	CID (Collision Induced Dissociation)	MS2		1.283	37.008	11616	R_DC_WT_A.raw	2	0.0003239	0.00958
	High	Sequest HT (A11)	Unambiguous	FGMMAAQMK		3	7	326496681; 326516502; 326532104	326508766; 326496681; 326488379; 326512488; 326516502; 326532104; 257667787	0	2	0.2681	0	1	1	508.337	1015.67	1014.46	1193.26	0.60525	461431	CID (Collision Induced Dissociation)	MS2		1.591	37.0039	11614	R_DC_WT_A.raw	2.35	0.0008073	0.01233
	High	Sequest HT (A11)	Unambiguous	FGMMAAQMK		3	7	326496681; 326516502; 326532104	326508766; 326496681; 326488379; 326512488; 326516502; 326532104; 257667787	0	1	0.1925	0	1	1	1014.43	1014.43	1014.46	-26.08	-0.02646	104089	CID (Collision Induced Dissociation)	MS2		16.964	36.0137	11229	R_DC_WT_A.raw	1.87	0.00126	0.0241
	High	Sequest HT (A11)	Unambiguous	FGMMAAQMK		3	7	326496681; 326516502; 326532104	326508766; 326496681; 326488379; 326512488; 326516502; 326532104; 257667787	0	2	0.3242	0	1	1	507.004	1013	1014.46	-1435.46	-0.7281	674016	CID (Collision Induced Dissociation)	MS2		0.806	35.625	11074	R_DC_WT_A.raw	1.82	0.001402	0.02683
	High	Sequest HT (A11)	Unambiguous	TDVPVISPQELAEADGVLFGFPTR		1	1	326516502	326516502	0	3	0.4059	0	1	1	853.261	2557.77	2558.31	-213.48	-0.18205	19457.8	CID (Collision Induced Dissociation)	MS2		50	98.3551	34338	R_DC_WT_A.raw	4.41	0	0.0008041
High	Master Protein	326493522	Name:"Similar to Phosphoglycerate kinase, cytosolic (Triticum aestivum OX=4565)"	0	14.026	22.4439	6	12	2	1	401	42.1	6.23	30.49	6
	Confidence	Identifying Node	PSM Ambiguity	Annotated Sequence	Modifications	# Protein Groups	# Proteins	Master Protein Accessions	Protein Accessions	# Missed Cleavages	Charge	DeltaScore	DeltaCn	Rank	Search Engine Rank	m/z [Da]	MH+ [Da]	Theo. MH+ [Da]	DeltaM [ppm]	Deltam/z [Da]	Intensity	Activation Type	MS Order	Isolation Interference [%]	Ion Inject Time [ms]	RT [min]	First Scan	Spectrum File	XCorr	Percolator q-Value	Percolator PEP
	High	Sequest HT (A11)	Unambiguous	IGVIESLLAK		2	3	326493522; 326522650	28172913; 326493522; 326522650	0	2	0.1745	0	1	1	521.838	1042.67	1042.65	16.59	0.00865	467427	CID (Collision Induced Dissociation)	MS2		1.888	63.677	22016	R_DC_WT_A.raw	3.21	0	0.003957
	High	Sequest HT (A11)	Unambiguous	IGVIESLLAK		2	3	326493522; 326522650	28172913; 326493522; 326522650	0	2	0.1242	0	1	1	522.338	1043.67	1042.65	975.7	0.50866	156139	CID (Collision Induced Dissociation)	MS2		2.957	63.402	21911	R_DC_WT_A.raw	3.14	0	0.0005673
	High	Sequest HT (A11)	Unambiguous	LASVADLYVNDAFGTAHR		2	3	326493522; 326522650	28172913; 326493522; 326522650	0	3	0.176	0	1	1	641.423	1922.26	1919.96	1194.95	0.76475	450238	CID (Collision Induced Dissociation)	MS2		2.465	61.1364	21042	R_DC_WT_A.raw	2.5	0	0.006516
	High	Sequest HT (A11)	Unambiguous	ELDYLVGAVADPK		1	1	326493522	326493522	0	2	0.2398	0	1	1	695.341	1389.67	1389.73	-36.94	-0.02567	224548	CID (Collision Induced Dissociation)	MS2		4.172	59.3715	20360	R_DC_WT_A.raw	3.67	0	0.0009125
	High	Sequest HT (A11)	Unambiguous	TVIWNGPMGVFEFEK		2	3	326493522; 326522650	28172913; 326493522; 326522650	0	2	0.3863	0	1	1	878.428	1755.85	1753.86	1132.72	0.99331	52251.3	CID (Collision Induced Dissociation)	MS2		31.605	83.0978	29225	R_DC_WT_A.raw	3.65	0	0.002541
	High	Sequest HT (A11)	Unambiguous	IGVIESLLAK		2	3	326493522; 326522650	28172913; 326493522; 326522650	0	2	0.1341	0	1	1	522.338	1043.67	1042.65	975.7	0.50866	174943	CID (Collision Induced Dissociation)	MS2		12.3	65.0968	22561	R_DC_WT_A.raw	2.76	0	0.003422
	High	Sequest HT (A11)	Unambiguous	FAAGTDAIAK		2	3	326493522; 326522650	28172913; 326493522; 326522650	0	1	0.0556	0	1	1	963.846	963.846	964.51	-688.07	-0.66365	86395.5	CID (Collision Induced Dissociation)	MS2		15.287	23.2984	6259	R_DC_WT_A.raw	1.62	0.006343	0.09018
	High	Sequest HT (A11)	Unambiguous	FAAGTDAIAK		2	3	326493522; 326522650	28172913; 326493522; 326522650	0	1	0.17	0	1	1	964.596	964.596	964.51	89.54	0.08637	122504	CID (Collision Induced Dissociation)	MS2		16.317	22.6201	5992	R_DC_WT_A.raw	2	0.001402	0.02724
	High	Sequest HT (A11)	Unambiguous	FAAGTDAIAK		2	3	326493522; 326522650	28172913; 326493522; 326522650	0	1	0.205	0	1	1	965.513	965.513	964.51	1039.96	1.00305	80376.8	CID (Collision Induced Dissociation)	MS2		29.236	22.4716	5936	R_DC_WT_A.raw	2	0.00602	0.08732
	High	Sequest HT (A11)	Unambiguous	ELDYLVGAVADPK		1	1	326493522	326493522	0	2	0.078	0	1	1	696.424	1391.84	1389.73	1522.15	1.05768	210482	CID (Collision Induced Dissociation)	MS2		5.009	57.0298	19445	R_DC_WT_A.raw	2.82	0.001402	0.02865
	High	Sequest HT (A11)	Unambiguous	LADITAQGVtTIIGGGDSVAAVEK	T10(Phospho)	1	1	326493522	326493522	0	3		0.0383	2	2	788.426	2363.26	2366.19	-1234.59	-0.97376	279476	CID (Collision Induced Dissociation)	MS2		3.685	48.4568	16088	R_DC_WT_A.raw	3.01	0.007021	0.09465
	High	Sequest HT (A11)	Unambiguous	LADITAQGVTtIIGGGDSVAAVEK	T11(Phospho)	1	1	326493522	326493522	0	3	0.0383	0	1	1	788.426	2363.26	2366.19	-1234.59	-0.97376	279476	CID (Collision Induced Dissociation)	MS2		3.685	48.4568	16088	R_DC_WT_A.raw	3.13	0.001499	0.04034
High	Master Protein	326494026	Name:"Similar to Os09g0277800 Enoyl-[acyl-carrier-protein] reductase [NADH] 2, chloroplastic (Oryza sativa subsp. japonica OX=39947)"	0	7.737	12.2549	3	5	3	1	408	42.6	8.91	14.44	3
	Confidence	Identifying Node	PSM Ambiguity	Annotated Sequence	Modifications	# Protein Groups	# Proteins	Master Protein Accessions	Protein Accessions	# Missed Cleavages	Charge	DeltaScore	DeltaCn	Rank	Search Engine Rank	m/z [Da]	MH+ [Da]	Theo. MH+ [Da]	DeltaM [ppm]	Deltam/z [Da]	Intensity	Activation Type	MS Order	Isolation Interference [%]	Ion Inject Time [ms]	RT [min]	First Scan	Spectrum File	XCorr	Percolator q-Value	Percolator PEP
	High	Sequest HT (A11)	Unambiguous	AFIAGVADDNGyGWAIAK	Y12(Phospho)	1	1	326494026	326494026	0	2	0.1365	0	1	1	959.429	1917.85	1918.87	-532.57	-0.51097	143076	CID (Collision Induced Dissociation)	MS2		7.171	58.1182	19870	R_DC_WT_A.raw	2.93	0.001499	0.04942
	High	Sequest HT (A11)	Unambiguous	VYPLDAVFDSLEDVPEDVK		1	1	326494026	326494026	0	2	0.2367	0	1	1	1076.02	2151.02	2150.05	450.59	0.48439	105132	CID (Collision Induced Dissociation)	MS2		19.142	67.727	23569	R_DC_WT_A.raw	3	0.001059	0.01931
	High	Sequest HT (A11)	Unambiguous	MIEYSYVNAPLQK		1	1	326494026	326494026	0	2	0.2006	0	1	1	778.343	1555.68	1555.78	-67.23	-0.0523	313517	CID (Collision Induced Dissociation)	MS2		8.744	50.0566	16714	R_DC_WT_A.raw	3.09	0	0.005033
	High	Sequest HT (A11)	Unambiguous	MIEYSYVNAPLQK		1	1	326494026	326494026	0	2	0.161	0	1	1	778.343	1555.68	1555.78	-67.23	-0.0523	260155	CID (Collision Induced Dissociation)	MS2		3.126	48.3964	16063	R_DC_WT_A.raw	2.67	0.0008073	0.01276
	High	Sequest HT (A11)	Unambiguous	mIEYSYVNAPLQK	M1(Oxidation)	1	1	326494026	326494026	0	2	0.1382	0	1	1	786.843	1572.68	1571.78	573.12	0.45041	101109	CID (Collision Induced Dissociation)	MS2		4.477	44.2376	14436	R_DC_WT_A.raw	2.75	0	0.003815
High	Master Protein	326522841	Name:"Similar to FBA5 Fructose-bisphosphate aldolase 5, cytosolic (Arabidopsis thaliana OX=3702)"	0	6.735	6.11111	3	5	1	1	360	37.9	6.4	13.47	3
	Confidence	Identifying Node	PSM Ambiguity	Annotated Sequence	Modifications	# Protein Groups	# Proteins	Master Protein Accessions	Protein Accessions	# Missed Cleavages	Charge	DeltaScore	DeltaCn	Rank	Search Engine Rank	m/z [Da]	MH+ [Da]	Theo. MH+ [Da]	DeltaM [ppm]	Deltam/z [Da]	Intensity	Activation Type	MS Order	Isolation Interference [%]	Ion Inject Time [ms]	RT [min]	First Scan	Spectrum File	XCorr	Percolator q-Value	Percolator PEP
	High	Sequest HT (A11)	Unambiguous	GILAADESTGTIGKR		2	3	326516742; 326522841	226316443; 326516742; 326522841	1	2	0.5134	0	1	1	745.425	1489.84	1488.8	699.65	0.52082	1.13571e+06	CID (Collision Induced Dissociation)	MS2		0.86	27.4226	7871	R_DC_WT_A.raw	3.37	0	0.001875
	High	Sequest HT (A11)	Unambiguous	yIATPGKGILAADESTGTIGKR	Y1(Phospho)	1	1	326522841	326522841	2	3	0.242	0	1	1	766.426	2297.26	2299.17	-829.36	-0.63561	362893	CID (Collision Induced Dissociation)	MS2		5.457	43.7458	14241	R_DC_WT_A.raw	2.81	0.001499	0.03948
	High	Sequest HT (A11)	Unambiguous	GILAADESTGTIGK		2	3	326516742; 326522841	226316443; 326516742; 326522841	0	2	0.5177	0	1	1	666.257	1331.51	1332.7	-895.66	-0.59682	169692	CID (Collision Induced Dissociation)	MS2		4.583	35.4078	10988	R_DC_WT_A.raw	3.11	0	0.003513
	High	Sequest HT (A11)	Unambiguous	GILAADESTGTIGK		2	3	326516742; 326522841	226316443; 326516742; 326522841	0	2	0.5335	0	1	1	666.924	1332.84	1332.7	104.84	0.06986	1.34673e+06	CID (Collision Induced Dissociation)	MS2		0.824	35.3051	10947	R_DC_WT_A.raw	4.18	0.0003239	0.007208
	High	Sequest HT (A11)	Unambiguous	YIAtPGKGILAADESTGTIGKR	T4(Phospho)	1	1	326522841	326522841	2	3	0.242	0	1	2	766.426	2297.26	2299.17	-829.36	-0.63561	362893	CID (Collision Induced Dissociation)	MS2		5.457	43.7458	14241	R_DC_WT_A.raw	2.81	0.001402	0.02797
High	Master Protein	326489113	Name:"Similar to CAF1-7 Probable CCR4-associated factor 1 homolog 7 (Arabidopsis thaliana OX=3702)"	0.003	1.783	6.81004	1	2	1	1	279	30.7	5.11	3.8	1
	Confidence	Identifying Node	PSM Ambiguity	Annotated Sequence	Modifications	# Protein Groups	# Proteins	Master Protein Accessions	Protein Accessions	# Missed Cleavages	Charge	DeltaScore	DeltaCn	Rank	Search Engine Rank	m/z [Da]	MH+ [Da]	Theo. MH+ [Da]	DeltaM [ppm]	Deltam/z [Da]	Intensity	Activation Type	MS Order	Isolation Interference [%]	Ion Inject Time [ms]	RT [min]	First Scan	Spectrum File	XCorr	Percolator q-Value	Percolator PEP
	High	Sequest HT (A11)	Unambiguous	LLtGSNLPDTSsGFFDLIR	T3(Phospho); S12(Phospho)	1	1	326489113	326489113	0	2		0.0342	2	2	1108.43	2215.86	2212.99	1294.46	1.43231	96396	CID (Collision Induced Dissociation)	MS2		19.861	57.4303	19601	R_DC_WT_A.raw	3.67	0.0008073	0.01648
	High	Sequest HT (A11)	Unambiguous	LLTGsNLPDTsSGFFDLIR	S5(Phospho); S11(Phospho)	1	1	326489113	326489113	0	2	0.0342	0	1	1	1108.43	2215.86	2212.99	1294.46	1.43231	96396	CID (Collision Induced Dissociation)	MS2		19.861	57.4303	19601	R_DC_WT_A.raw	3.8	0.001499	0.03662
High	Master Protein	326523693	Name:"Similar to SAT4 Probable serine acetyltransferase 4 (Oryza sativa subsp. japonica OX=39947)"	0.005	1.463	5.73248	1	1	1	1	314	32.8	6.65	3.44	1
	Confidence	Identifying Node	PSM Ambiguity	Annotated Sequence	Modifications	# Protein Groups	# Proteins	Master Protein Accessions	Protein Accessions	# Missed Cleavages	Charge	DeltaScore	DeltaCn	Rank	Search Engine Rank	m/z [Da]	MH+ [Da]	Theo. MH+ [Da]	DeltaM [ppm]	Deltam/z [Da]	Intensity	Activation Type	MS Order	Isolation Interference [%]	Ion Inject Time [ms]	RT [min]	First Scan	Spectrum File	XCorr	Percolator q-Value	Percolator PEP
	High	Sequest HT (A11)	Unambiguous	VGDGVLIGAGAsVLGNVR	S12(Phospho)	1	2	326523693	326523693; 326511902	0	2	0.157	0	1	1	868.594	1736.18	1733.89	1318.89	1.1434	71904	CID (Collision Induced Dissociation)	MS2		26.855	71.0409	24831	R_DC_WT_A.raw	3.44	0.001499	0.03444
High	Master Protein	326533076	Name:"Similar to TAR4 Tryptophan aminotransferase-related protein 4 (Arabidopsis thaliana OX=3702)"	0.005	1.466	2.69151	1	1	1	1	483	53	6.21	3.04	1
	Confidence	Identifying Node	PSM Ambiguity	Annotated Sequence	Modifications	# Protein Groups	# Proteins	Master Protein Accessions	Protein Accessions	# Missed Cleavages	Charge	DeltaScore	DeltaCn	Rank	Search Engine Rank	m/z [Da]	MH+ [Da]	Theo. MH+ [Da]	DeltaM [ppm]	Deltam/z [Da]	Intensity	Activation Type	MS Order	Isolation Interference [%]	Ion Inject Time [ms]	RT [min]	First Scan	Spectrum File	XCorr	Percolator q-Value	Percolator PEP
	High	Sequest HT (A11)	Unambiguous	TtDGLFQSVELER	T2(Phospho)	1	1	326533076	326533076	0	3	0.0789	0	1	1	524.338	1571	1574.71	-2356.83	-1.23711	387154	CID (Collision Induced Dissociation)	MS2		1.284	33.5515	10263	R_DC_WT_A.raw	3.04	0.001499	0.03422

## Sheet: ROOT WT_replicate 2
Phosphopeptides detected in the proteome of untreated wild type roots - replicate 2.
Protein FDR Confidence	Master	Accession	Description	Exp. q-value	Sum PEP Score	Coverage	# Peptides	# PSMs	# Unique Peptides	# Protein Groups	# AAs	MW [kDa]	calc. pI	Score Sequest HT	# Peptides Sequest HT
High	Master Protein	326502638	Name:"Similar to PER52 Peroxidase 52 (Arabidopsis thaliana OX=3702)"	0	40.644	58.0745	13	24	12	1	322	34.1	9.39	77.36	13
	Confidence	Identifying Node	PSM Ambiguity	Annotated Sequence	Modifications	# Protein Groups	# Proteins	Master Protein Accessions	Protein Accessions	# Missed Cleavages	Charge	DeltaScore	DeltaCn	Rank	Search Engine Rank	m/z [Da]	MH+ [Da]	Theo. MH+ [Da]	DeltaM [ppm]	Deltam/z [Da]	Intensity	Activation Type	MS Order	Isolation Interference [%]	Ion Inject Time [ms]	RT [min]	First Scan	Spectrum File	XCorr	Percolator q-Value	Percolator PEP
	High	Sequest HT (A11)	Unambiguous	ATVScADILALAAR	C5(Carbamidomethyl)	1	1	326502638	326502638	0	2	0.174	0	1	1	717.425	1433.84	1431.76	1452.6	1.03989	223716	CID (Collision Induced Dissociation)	MS2		1.501	64.0879	22269	R_DC_WT_AB.raw	3.62	0	0.0007089
	High	Sequest HT (A11)	Unambiguous	SGGGSSLAPLDAQTADGFDNAYYR		1	1	326502638	326502638	0	2	0.5393	0	1	1	1217.02	2433.03	2433.1	-27.59	-0.03356	106521	CID (Collision Induced Dissociation)	MS2		13.486	60.9996	21076	R_DC_WT_AB.raw	4.58	0	6.008e-05
	High	Sequest HT (A11)	Unambiguous	ATVScADILALAAR	C5(Carbamidomethyl)	1	1	326502638	326502638	0	2	0.3553	0	1	1	715.425	1429.84	1431.76	-1341.21	-0.96015	125822	CID (Collision Induced Dissociation)	MS2		4.257	64.0487	22254	R_DC_WT_AB.raw	3.04	0	0.0004992
	High	Sequest HT (A11)	Unambiguous	QYSSSPGQFSADFVTAMLK		1	1	326502638	326502638	0	3	0.25	0	1	1	688.674	2064.01	2063.97	16.34	0.01124	57257.4	CID (Collision Induced Dissociation)	MS2		30.595	83.7569	29726	R_DC_WT_AB.raw	3.04	0	0.001244
	High	Sequest HT (A11)	Unambiguous	QYSSSPGQFSADFVTAMLK		1	1	326502638	326502638	0	3	0.2191	0	1	1	689.508	2066.51	2063.97	1227.62	0.84459	89140.1	CID (Collision Induced Dissociation)	MS2		29.965	83.6268	29679	R_DC_WT_AB.raw	3.24	0	0.002095
	High	Sequest HT (A11)	Unambiguous	DGVNLLGGPTWSVPLGR		1	1	326502638	326502638	0	2	0.2123	0	1	1	869.344	1737.68	1737.93	-142.03	-0.12342	78515.6	CID (Collision Induced Dissociation)	MS2		18.413	83.3793	29588	R_DC_WT_AB.raw	3.25	0.0007822	0.03327
	High	Sequest HT (A11)	Unambiguous	QYSSSPGQFSADFVTAMLK		1	1	326502638	326502638	0	2	0.5446	0	1	1	1033.43	2065.85	2063.97	910.94	0.94008	66444.3	CID (Collision Induced Dissociation)	MS2		14.303	83.1639	29508	R_DC_WT_AB.raw	4.04	0	1.627e-05
	High	Sequest HT (A11)	Unambiguous	QYSSSPGQFSADFVTAMLK		1	1	326502638	326502638	0	2	0.1556	0	1	1	1033.93	2066.85	2063.97	1395.45	1.44009	34995.9	CID (Collision Induced Dissociation)	MS2		43.17	83.1315	29497	R_DC_WT_AB.raw	2.7	0.0002395	0.01217
	High	Sequest HT (A11)	Unambiguous	QYSSSPGQFSADFVTAMLK		1	1	326502638	326502638	0	2	0.4903	0	1	1	1031.93	2062.85	2063.97	-542.59	-0.55995	65310.6	CID (Collision Induced Dissociation)	MS2		29.498	82.8238	29385	R_DC_WT_AB.raw	3.1	0	0.0001165
	High	Sequest HT (A11)	Unambiguous	LFFHDcFVNGcDGSILLDDTSTLTGEK	C6(Carbamidomethyl); C11(Carbamidomethyl)	1	1	326502638	326502638	0	3	0.2792	0	1	1	1021.76	3063.28	3061.39	615.92	0.62852	60814.7	CID (Collision Induced Dissociation)	MS2		35.047	81.4468	28883	R_DC_WT_AB.raw	5.05	0	3.466e-05
	High	Sequest HT (A11)	Unambiguous	SGGGSSLAPLDAQTADGFDNAYYR		1	1	326502638	326502638	0	3	0.25	0	1	1	811.76	2433.27	2433.1	69.8	0.05661	230026	CID (Collision Induced Dissociation)	MS2		5.311	60.9719	21064	R_DC_WT_AB.raw	3.64	0	0.008282
	High	Sequest HT (A11)	Unambiguous	DMTALSGAHTIGR		1	1	326502638	326502638	0	2	0.462	0	1	1	665.257	1329.51	1329.66	-113.64	-0.07555	507026	CID (Collision Induced Dissociation)	MS2		2.193	30.8433	9237	R_DC_WT_AB.raw	3.68	0	0.0005094
	High	Sequest HT (A11)	Unambiguous	NLsPRDmTALSGAHTIGR	S3(Phospho); M7(Oxidation)	1	1	326502638	326502638	1	3	0.1018	0	1	1	665.924	1995.76	1992.93	1417.3	0.94153	264136	CID (Collision Induced Dissociation)	MS2		3.721	30.6377	9158	R_DC_WT_AB.raw	2.85	0.0005985	0.02474
	High	Sequest HT (A11)	Unambiguous	DMTALSGAHTIGR		1	1	326502638	326502638	0	2	0.5055	0	1	1	665.924	1330.84	1329.66	889.14	0.59113	264136	CID (Collision Induced Dissociation)	MS2		3.721	30.6377	9158	R_DC_WT_AB.raw	3.62	0	0.0001574
	High	Sequest HT (A11)	Unambiguous	MGASILR		4	5	326519130; 326527949; 326502638; 326530424	326519130; 326527949; 326502638; 326511186; 326530424	0	2	0.1298	0	1	1	373.335	745.662	747.418	-2349.35	-0.87797	429064	CID (Collision Induced Dissociation)	MS2		1.478	26.6542	7586	R_DC_WT_AB.raw	2.08	0.003019	0.05338
	High	Sequest HT (A11)	Unambiguous	MGASILR		4	5	326519130; 326527949; 326502638; 326530424	326519130; 326527949; 326502638; 326511186; 326530424	0	2	0.1096	0	1	2	374.335	747.662	747.418	326.58	0.12205	853985	CID (Collision Induced Dissociation)	MS2		1.51	25.6523	7186	R_DC_WT_AB.raw	2.19	0.005815	0.08476
	High	Sequest HT (A11)	Unambiguous	SGMTSALQTER		1	1	326502638	326502638	0	2	0.2234	0	1	1	590.756	1180.5	1180.56	-49.71	-0.02935	311293	CID (Collision Induced Dissociation)	MS2		3.122	23.5629	6363	R_DC_WT_AB.raw	2.91	0	0.004677
	High	Sequest HT (A11)	Unambiguous	SGMTSALQTER		1	1	326502638	326502638	0	2	0.2853	0	1	1	590.839	1180.67	1180.56	91.46	0.05399	313058	CID (Collision Induced Dissociation)	MS2		2.813	22.0829	5785	R_DC_WT_AB.raw	3.19	0	0.004423
	High	Sequest HT (A11)	Unambiguous	MGGLLPSPGTR		1	1	326502638	326502638	0	2	0.1343	0	1	1	543.255	1085.5	1085.58	-69.14	-0.03753	647488	CID (Collision Induced Dissociation)	MS2		1.396	37.7705	11958	R_DC_WT_AB.raw	2.16	0.0005985	0.02479
	High	Sequest HT (A11)	Unambiguous	GFDVIDAIK		1	1	326502638	326502638	0	2	0.317	0	1	1	489.837	978.667	977.53	1162.63	0.56826	440154	CID (Collision Induced Dissociation)	MS2		1.998	59.797	20612	R_DC_WT_AB.raw	2.65	0.0002395	0.01193
	High	Sequest HT (A11)	Selected	GFDVIDAIK		1	1	326502638	326502638	0	2		0.0192	2	2	490.337	979.667	977.53	2185.64	1.06826	286220	CID (Collision Induced Dissociation)	MS2		1.472	59.6644	20561	R_DC_WT_AB.raw	2.56	0.003019	0.05421
	High	Sequest HT (A11)	Unambiguous	GLLHSDQELFNGGSQDSLVR		1	1	326502638	326502638	0	3	0.3423	0	1	1	724.675	2172.01	2172.07	-26.66	-0.0193	219386	CID (Collision Induced Dissociation)	MS2		2.497	54.4438	18514	R_DC_WT_AB.raw	4.09	0	0.001857
	High	Sequest HT (A11)	Unambiguous	GLLHSDQELFNGGSQDSLVR		1	1	326502638	326502638	0	3	0.3037	0	1	1	725.342	2174.01	2172.07	894.14	0.64738	508535	CID (Collision Induced Dissociation)	MS2		1.988	54.3875	18491	R_DC_WT_AB.raw	4.05	0	0.0008214
	High	Sequest HT (A11)	Unambiguous	ScPNLASIVR	C2(Carbamidomethyl)	1	1	326502638	326502638	0	2	0.3005	0	1	1	558.838	1116.67	1116.58	77.38	0.0432	1.07664e+06	CID (Collision Induced Dissociation)	MS2		1.043	39.9234	12801	R_DC_WT_AB.raw	2.03	0.0004393	0.01753
High	Master Protein	326497219	Name:"Similar to HSP70 Heat shock cognate 70 kDa protein (Petunia hybrida OX=4102)"	0	30.277	21.4612	10	17	2	1	657	71.9	5.25	51.48	10
	Confidence	Identifying Node	PSM Ambiguity	Annotated Sequence	Modifications	# Protein Groups	# Proteins	Master Protein Accessions	Protein Accessions	# Missed Cleavages	Charge	DeltaScore	DeltaCn	Rank	Search Engine Rank	m/z [Da]	MH+ [Da]	Theo. MH+ [Da]	DeltaM [ppm]	Deltam/z [Da]	Intensity	Activation Type	MS Order	Isolation Interference [%]	Ion Inject Time [ms]	RT [min]	First Scan	Spectrum File	XCorr	Percolator q-Value	Percolator PEP
	High	Sequest HT (A11)	Selected	MyQGAGPGGAAGMDEDMPSGGAGAGGGsGAGPK	Y2(Phospho); S28(Phospho)	1	1	326497219	326497219	0	3	0.0135	0	1	1	995.93	2985.78	2983.11	893.85	0.88882	99994.4	CID (Collision Induced Dissociation)	MS2		25.007	70.2549	24641	R_DC_WT_AB.raw	2.97	0.003019	0.05339
	High	Sequest HT (A11)	Unambiguous	VQQLLQDFFNGK		3	6	326506132; 326499406; 326497219	326506132; 326499406; 326517481; 326525174; 326497219; 326519769	0	2	0.056	0	1	1	719.341	1437.68	1436.75	641.98	0.46119	336949	CID (Collision Induced Dissociation)	MS2		3.006	69.9347	24518	R_DC_WT_AB.raw	4.11	0	0.0006784
	High	Sequest HT (A11)	Selected	VQQLLQDFFNGK		3	6	326506132; 326499406; 326497219	326506132; 326499406; 326517481; 326525174; 326497219; 326519769	0	2	0.0041	0	1	1	720.008	1439.01	1436.75	1570.02	1.12787	182675	CID (Collision Induced Dissociation)	MS2		5.611	69.6975	24428	R_DC_WT_AB.raw	2.44	0.005677	0.0807
	High	Sequest HT (A11)	Unambiguous	IINEPTAAAIAYGLDK		4	7	326495158; 326506132; 326499406; 326497219	326495158; 326506132; 326499406; 219764950; 326525174; 326497219; 326519769	0	2	0.3692	0	1	2	830.01	1659.01	1659.9	-531.35	-0.44099	243846	CID (Collision Induced Dissociation)	MS2		7.179	61.6656	21334	R_DC_WT_AB.raw	3.44	0	0.0001658
	High	Sequest HT (A11)	Unambiguous	IINEPTAAAIAYGLDK		4	7	326495158; 326506132; 326499406; 326497219	326495158; 326506132; 326499406; 219764950; 326525174; 326497219; 326519769	0	3	0.1047	0	1	2	553.588	1658.75	1659.9	-689.8	-0.38167	136569	CID (Collision Induced Dissociation)	MS2		9.492	61.4462	21249	R_DC_WT_AB.raw	2.96	0.003456	0.05868
	High	Sequest HT (A11)	Unambiguous	IINEPTAAAIAYGLDK		4	7	326495158; 326506132; 326499406; 326497219	326495158; 326506132; 326499406; 219764950; 326525174; 326497219; 326519769	0	3	0.2103	0	1	1	554.005	1660	1659.9	63.24	0.03499	177624	CID (Collision Induced Dissociation)	MS2		4.419	60.9815	21068	R_DC_WT_AB.raw	3.9	0	0.001883
	High	Sequest HT (A11)	Unambiguous	FEELNMDLFR		3	7	326499406; 326515998; 326497219	326533846; 326499406; 326515998; 326517481; 326525174; 326497219; 326519769	0	2	0.0754	0	1	1	657.424	1313.84	1313.62	167.81	0.11022	117112	CID (Collision Induced Dissociation)	MS2		5.211	72.4637	25487	R_DC_WT_AB.raw	2.52	0.0002395	0.009499
	High	Sequest HT (A11)	Unambiguous	EQVFSTYSDNQPGVLIQVYEGER		3	5	326506132; 326499406; 326497219	2695923; 326506132; 326499406; 326497219; 326519769	0	2	0.5301	0	1	1	1329.6	2658.2	2658.27	-25.95	-0.03449	130526	CID (Collision Induced Dissociation)	MS2		20.77	74.2374	26165	R_DC_WT_AB.raw	3.49	0.0002395	0.01028
	High	Sequest HT (A11)	Unambiguous	VQQLLQDFFNGK		3	6	326506132; 326499406; 326497219	326506132; 326499406; 326517481; 326525174; 326497219; 326519769	0	2	0.0756	0	1	1	719.091	1437.18	1436.75	293.97	0.21118	173257	CID (Collision Induced Dissociation)	MS2		3.738	73.1853	25763	R_DC_WT_AB.raw	2.25	0.005281	0.07754
	High	Sequest HT (A11)	Unambiguous	MVNHFVQEFK		3	5	326506132; 326499406; 326497219	326506132; 326499406; 326525174; 326497219; 326519769	0	2	0.2741	0	1	1	640.257	1279.51	1278.63	685.05	0.43797	559286	CID (Collision Induced Dissociation)	MS2		2.165	32.2589	9796	R_DC_WT_AB.raw	2.59	0	0.007311
	High	Sequest HT (A11)	Unambiguous	MVNHFVQEFK		3	5	326506132; 326499406; 326497219	326506132; 326499406; 326525174; 326497219; 326519769	0	3	0.1617	0	1	1	426.919	1278.74	1278.63	88.26	0.03762	801006	CID (Collision Induced Dissociation)	MS2		1.477	32.2548	9794	R_DC_WT_AB.raw	2.35	0.0005985	0.0289
	High	Sequest HT (A11)	Unambiguous	DAGVIAGLNVMR		1	2	326497219	326525174; 326497219	0	2	0.5301	0	1	1	608.339	1215.67	1215.65	16.37	0.00995	1.4018e+06	CID (Collision Induced Dissociation)	MS2		1.446	58.9197	20270	R_DC_WT_AB.raw	3.32	0	0.003052
	High	Sequest HT (A11)	Unambiguous	IINEPTAAAIAYGLDKK		3	5	326506132; 326499406; 326497219	326506132; 326499406; 326525174; 326497219; 326519769	1	2	0.3528	0	1	1	894.678	1788.35	1787.99	200.72	0.17944	267731	CID (Collision Induced Dissociation)	MS2		10.858	52.2483	17652	R_DC_WT_AB.raw	3.6	0.0004393	0.02006
	High	Sequest HT (A11)	Unambiguous	IINEPTAAAIAYGLDKK		3	5	326506132; 326499406; 326497219	326506132; 326499406; 326525174; 326497219; 326519769	1	2	0.2818	0	1	1	895.012	1789.02	1787.99	573.59	0.51278	203188	CID (Collision Induced Dissociation)	MS2		5.98	51.3836	17311	R_DC_WT_AB.raw	3.3	0.0007822	0.03452
	High	Sequest HT (A11)	Unambiguous	DAGVIAGLNVmR	M11(Oxidation)	1	2	326497219	326525174; 326497219	0	2	0.186	0	1	1	616.339	1231.67	1231.65	20.54	0.01265	330669	CID (Collision Induced Dissociation)	MS2		3.838	46.3478	15324	R_DC_WT_AB.raw	2.58	0	0.008609
	High	Sequest HT (A11)	Selected	NALENYAYNMR		2	3	326499406; 326497219	326499406; 326497219; 326519769	0	2	0.0042	0	1	1	680.924	1360.84	1358.62	1637.72	1.11252	485345	CID (Collision Induced Dissociation)	MS2		2.526	42.9958	14007	R_DC_WT_AB.raw	2.37	0.0005985	0.02243
	High	Sequest HT (A11)	Unambiguous	TTPSYVAFTDTER		2	3	326499406; 326497219	326499406; 326497219; 326519769	0	2	0.4212	0	1	1	744.842	1488.68	1487.7	655.6	0.48767	375499	CID (Collision Induced Dissociation)	MS2		3.499	41.1661	13288	R_DC_WT_AB.raw	3.3	0	0.0001915
High	Master Protein	326522841	Name:"Similar to FBA5 Fructose-bisphosphate aldolase 5, cytosolic (Arabidopsis thaliana OX=3702)"	0	5.369	6.11111	3	7	1	1	360	37.9	6.4	19.44	3
	Confidence	Identifying Node	PSM Ambiguity	Annotated Sequence	Modifications	# Protein Groups	# Proteins	Master Protein Accessions	Protein Accessions	# Missed Cleavages	Charge	DeltaScore	DeltaCn	Rank	Search Engine Rank	m/z [Da]	MH+ [Da]	Theo. MH+ [Da]	DeltaM [ppm]	Deltam/z [Da]	Intensity	Activation Type	MS Order	Isolation Interference [%]	Ion Inject Time [ms]	RT [min]	First Scan	Spectrum File	XCorr	Percolator q-Value	Percolator PEP
	High	Sequest HT (A11)	Unambiguous	GILAADESTGTIGK		2	3	326516742; 326522841	226316443; 326516742; 326522841	0	2	0.3742	0	1	1	667.84	1334.67	1332.7	1480.52	0.98654	939322	CID (Collision Induced Dissociation)	MS2		0.518	35.2953	10982	R_DC_WT_AB.raw	3.26	0.0002395	0.01349
	High	Sequest HT (A11)	Unambiguous	GILAADESTGTIGKR		2	3	326516742; 326522841	226316443; 326516742; 326522841	1	2	0.241	0	1	1	745.509	1490.01	1488.8	811.6	0.60416	748116	CID (Collision Induced Dissociation)	MS2		3.89	27.9598	8103	R_DC_WT_AB.raw	2.78	0.0002395	0.01166
	High	Sequest HT (A11)	Unambiguous	GILAADESTGTIGKR		2	3	326516742; 326522841	226316443; 326516742; 326522841	1	2	0.4058	0	1	1	745.509	1490.01	1488.8	811.6	0.60416	867704	CID (Collision Induced Dissociation)	MS2		0.867	26.5997	7564	R_DC_WT_AB.raw	3.13	0.0004393	0.01713
	High	Sequest HT (A11)	Unambiguous	GILAADESTGTIGK		2	3	326516742; 326522841	226316443; 326516742; 326522841	0	2	0.5278	0	1	1	666.924	1332.84	1332.7	104.84	0.06986	1.33904e+06	CID (Collision Induced Dissociation)	MS2		0.807	35.6626	11127	R_DC_WT_AB.raw	4.13	0.0002395	0.01224
	High	Sequest HT (A11)	Unambiguous	GILAADESTGTIGK		2	3	326516742; 326522841	226316443; 326516742; 326522841	0	2	0.5052	0	1	1	666.09	1331.17	1332.7	-1145.78	-0.76349	234983	CID (Collision Induced Dissociation)	MS2		1.229	35.856	11205	R_DC_WT_AB.raw	2.87	0.0002395	0.01156
	High	Sequest HT (A11)	Unambiguous	YIAtPGKGILAADESTGTIGKR	T4(Phospho)	1	1	326522841	326522841	2	3		0.0245	2	2	766.509	2297.51	2299.17	-720.62	-0.55228	249866	CID (Collision Induced Dissociation)	MS2		6.014	43.2779	14119	R_DC_WT_AB.raw	3.18	0.0005985	0.0317
	High	Sequest HT (A11)	Unambiguous	yIATPGKGILAADESTGTIGKR	Y1(Phospho)	1	1	326522841	326522841	2	3	0.0245	0	1	1	766.509	2297.51	2299.17	-720.62	-0.55228	249866	CID (Collision Induced Dissociation)	MS2		6.014	43.2779	14119	R_DC_WT_AB.raw	3.26	0.002724	0.04985
High	Master Protein	326528949	Name:"Similar to RAD23 Probable ubiquitin receptor RAD23 (Oryza sativa subsp. japonica OX=39947)"	0	8.999	12.1429	4	6	4	1	420	43.7	5.11	15.99	4
	Confidence	Identifying Node	PSM Ambiguity	Annotated Sequence	Modifications	# Protein Groups	# Proteins	Master Protein Accessions	Protein Accessions	# Missed Cleavages	Charge	DeltaScore	DeltaCn	Rank	Search Engine Rank	m/z [Da]	MH+ [Da]	Theo. MH+ [Da]	DeltaM [ppm]	Deltam/z [Da]	Intensity	Activation Type	MS Order	Isolation Interference [%]	Ion Inject Time [ms]	RT [min]	First Scan	Spectrum File	XCorr	Percolator q-Value	Percolator PEP
	High	Sequest HT (A11)	Selected	ILKDDTTLDANK		1	2	326528949	326501072; 326528949	1	2	0.0201	0	1	1	674.341	1347.67	1346.72	711.13	0.47884	53301.5	CID (Collision Induced Dissociation)	MS2		31.306	18.1998	4294	R_DC_WT_AB.raw	2.49	0.002724	0.04946
	High	Sequest HT (A11)	Unambiguous	AAYNNPERAIDyLySGIPESVEAPPVAR	Y12(Phospho); Y14(Phospho)	1	2	326528949	326501072; 326528949	1	3		0.0457	2	2	1074.51	3221.53	3222.45	-286.76	-0.30802	135879	CID (Collision Induced Dissociation)	MS2		14.21	70.8019	24850	R_DC_WT_AB.raw	3.55	0.004229	0.06614
	High	Sequest HT (A11)	Unambiguous	AAyNNPERAIDyLYSGIPESVEAPPVAR	Y3(Phospho); Y12(Phospho)	1	2	326528949	326501072; 326528949	1	3	0.0457	0	1	1	1074.51	3221.53	3222.45	-286.76	-0.30802	135879	CID (Collision Induced Dissociation)	MS2		14.21	70.8019	24850	R_DC_WT_AB.raw	3.72	0.002006	0.04612
	High	Sequest HT (A11)	Unambiguous	AIDYLYSGIPESVEAPPVAR		1	2	326528949	326501072; 326528949	0	2	0.4923	0	1	1	1074.51	2148.02	2147.1	428.84	0.46039	135879	CID (Collision Induced Dissociation)	MS2		14.21	70.8019	24850	R_DC_WT_AB.raw	4.57	0	1.088e-05
	High	Sequest HT (A11)	Unambiguous	AIDYLYSGIPESVEAPPVAR		1	2	326528949	326501072; 326528949	0	2	0.4184	0	1	1	1073.85	2146.69	2147.1	-192.16	-0.20629	106514	CID (Collision Induced Dissociation)	MS2		13.675	71.6617	25179	R_DC_WT_AB.raw	2.94	0	0.0008145
	High	Sequest HT (A11)	Selected	LIQENQAEFLR		1	2	326528949	326501072; 326528949	0	2	0.0088	0	1	1	681.424	1361.84	1360.72	822.26	0.55944	490141	CID (Collision Induced Dissociation)	MS2		1.611	42.4166	13780	R_DC_WT_AB.raw	2.27	0.001865	0.04038
High	Master Protein	326505528	Name:"Similar to MIC60 MICOS complex subunit MIC60 (Lodderomyces elongisporus (strain ATCC 11503 / CBS 2605 / JCM 1781 / NBRC 1676 / NRRL YB-4239) OX=379508)"	0	7.41	6.44628	3	4	3	1	605	66	5.16	14.51	3
	Confidence	Identifying Node	PSM Ambiguity	Annotated Sequence	Modifications	# Protein Groups	# Proteins	Master Protein Accessions	Protein Accessions	# Missed Cleavages	Charge	DeltaScore	DeltaCn	Rank	Search Engine Rank	m/z [Da]	MH+ [Da]	Theo. MH+ [Da]	DeltaM [ppm]	Deltam/z [Da]	Intensity	Activation Type	MS Order	Isolation Interference [%]	Ion Inject Time [ms]	RT [min]	First Scan	Spectrum File	XCorr	Percolator q-Value	Percolator PEP
	High	Sequest HT (A11)	Unambiguous	ELMYAEEAAILDK		1	1	326505528	326505528	0	2	0.3149	0	1	1	748.658	1496.31	1495.73	383.77	0.28701	180259	CID (Collision Induced Dissociation)	MS2		6.1	62.6494	21715	R_DC_WT_AB.raw	3.08	0.003456	0.05822
	High	Sequest HT (A11)	Unambiguous	ELMYAEEAAILDK		1	1	326505528	326505528	0	2	0.2507	0	1	1	749.092	1497.18	1495.73	964	0.72094	89697.7	CID (Collision Induced Dissociation)	MS2		7.379	62.5271	21668	R_DC_WT_AB.raw	3.55	0.007783	0.1055
	High	Sequest HT (A11)	Unambiguous	QsHsVHKLALGTLAFEEALSSGSPIR	S2(Phospho); S4(Phospho)	1	1	326505528	326505528	1	3	0.0793	0	1	1	966.93	2898.77	2895.38	1172.21	1.13133	91218.6	CID (Collision Induced Dissociation)	MS2		28.536	84.3464	29940	R_DC_WT_AB.raw	2.9	0.0007822	0.03464
	High	Sequest HT (A11)	Unambiguous	LALGTLAFEEALSSGSPIR		1	1	326505528	326505528	0	2	0.5542	0	1	1	966.93	1932.85	1932.04	418.31	0.40409	91218.6	CID (Collision Induced Dissociation)	MS2		28.536	84.3464	29940	R_DC_WT_AB.raw	4.98	0	1.927e-05
High	Master Protein	326506058	Name:"Similar to ubxn1 UBX domain-containing protein 1 (Xenopus tropicalis OX=8364)"	0	5.841	9.24574	3	5	3	1	411	46.2	6.07	11.77	3
	Confidence	Identifying Node	PSM Ambiguity	Annotated Sequence	Modifications	# Protein Groups	# Proteins	Master Protein Accessions	Protein Accessions	# Missed Cleavages	Charge	DeltaScore	DeltaCn	Rank	Search Engine Rank	m/z [Da]	MH+ [Da]	Theo. MH+ [Da]	DeltaM [ppm]	Deltam/z [Da]	Intensity	Activation Type	MS Order	Isolation Interference [%]	Ion Inject Time [ms]	RT [min]	First Scan	Spectrum File	XCorr	Percolator q-Value	Percolator PEP
	High	Sequest HT (A11)	Selected	EMLGELEsmGFsIAR	S8(Phospho); M9(Oxidation); S12(Phospho)	1	1	326506058	326506058	0	2		0.0404	3	3	923.845	1846.68	1845.72	522.04	0.48177	82890.4	CID (Collision Induced Dissociation)	MS2		13.642	72.1789	25378	R_DC_WT_AB.raw	2.85	0.0005985	0.02292
	High	Sequest HT (A11)	Unambiguous	LTNATFQER		1	1	326506058	326506058	0	2	0.1336	0	1	1	539.255	1077.5	1079.55	-1895.26	-1.02301	113331	CID (Collision Induced Dissociation)	MS2		6.04	19.628	4835	R_DC_WT_AB.raw	2.17	0.0004393	0.01592
	High	Sequest HT (A11)	Unambiguous	LTNATFQER		1	1	326506058	326506058	0	2	0.0648	0	1	1	540.255	1079.5	1079.55	-42.59	-0.02299	208890	CID (Collision Induced Dissociation)	MS2		7.124	19.6147	4829	R_DC_WT_AB.raw	2.16	0.002006	0.04499
	High	Sequest HT (A11)	Unambiguous	LTNATFQER		1	1	326506058	326506058	0	2	0.2211	0	1	1	541.255	1081.5	1079.55	1810.07	0.97703	157301	CID (Collision Induced Dissociation)	MS2		10.456	19.3722	4740	R_DC_WT_AB.raw	1.99	0.0004393	0.02074
	High	Sequest HT (A11)	Unambiguous	AFQTLLTYIGNVVK		1	1	326506058	326506058	0	2	0.0618	0	1	1	783.593	1566.18	1566.89	-453.71	-0.35545	48643.5	CID (Collision Induced Dissociation)	MS2		44.949	88.8251	31543	R_DC_WT_AB.raw	2.59	0	0.003954
High	Master Protein	326509231	Name:"Similar to RBG3 Glycine-rich RNA-binding protein 3, mitochondrial (Arabidopsis thaliana OX=3702)"	0	6.197	8.73016	2	2	2	1	252	24.9	5.06	6.87	2
	Confidence	Identifying Node	PSM Ambiguity	Annotated Sequence	Modifications	# Protein Groups	# Proteins	Master Protein Accessions	Protein Accessions	# Missed Cleavages	Charge	DeltaScore	DeltaCn	Rank	Search Engine Rank	m/z [Da]	MH+ [Da]	Theo. MH+ [Da]	DeltaM [ppm]	Deltam/z [Da]	Intensity	Activation Type	MS Order	Isolation Interference [%]	Ion Inject Time [ms]	RT [min]	First Scan	Spectrum File	XCorr	Percolator q-Value	Percolator PEP
	High	Sequest HT (A11)	Unambiguous	cmSssKLFVGGLSYTTDEGSLR	C1(Carbamidomethyl); M2(Oxidation); S4(Phospho); S5(Phospho)	1	1	326509231	326509231	1	3	0.0602	0	1	1	858.344	2573.02	2571.05	763.67	0.65448	157196	CID (Collision Induced Dissociation)	MS2		7.524	60.8544	21020	R_DC_WT_AB.raw	2.66	0.001718	0.0395
	High	Sequest HT (A11)	Unambiguous	LFVGGLSYTTDEGSLR		1	1	326509231	326509231	0	2	0.4941	0	1	1	858.344	1715.68	1714.86	476.04	0.40817	157196	CID (Collision Induced Dissociation)	MS2		7.524	60.8544	21020	R_DC_WT_AB.raw	4.21	0	1.61e-05
High	Master Protein	326498247	Name:"Similar to Hsp90b1 Endoplasmin (Rattus norvegicus OX=10116)"	0.005	1.38	2.04327	1	1	1	1	832	94.5	4.97	3.08	1
	Confidence	Identifying Node	PSM Ambiguity	Annotated Sequence	Modifications	# Protein Groups	# Proteins	Master Protein Accessions	Protein Accessions	# Missed Cleavages	Charge	DeltaScore	DeltaCn	Rank	Search Engine Rank	m/z [Da]	MH+ [Da]	Theo. MH+ [Da]	DeltaM [ppm]	Deltam/z [Da]	Intensity	Activation Type	MS Order	Isolation Interference [%]	Ion Inject Time [ms]	RT [min]	First Scan	Spectrum File	XCorr	Percolator q-Value	Percolator PEP
	High	Sequest HT (A11)	Unambiguous	mEtPKLHVVPEtVPVtK	M1(Oxidation); T3(Phospho); T12(Phospho); T16(Phospho)	1	1	326498247	326498247	1	3	0.0584	0	1	1	721.091	2161.26	2160.95	145.57	0.10486	155638	CID (Collision Induced Dissociation)	MS2		6.736	71.1167	24971	R_DC_WT_AB.raw	3.08	0.001865	0.04171
High	Master Protein	326530308	Name:"Similar to UXT3 UDP-xylose transporter 3 (Arabidopsis thaliana OX=3702)"	0.006	1.343	6.74157	1	1	1	1	356	38.7	8.5	2.64	1
	Confidence	Identifying Node	PSM Ambiguity	Annotated Sequence	Modifications	# Protein Groups	# Proteins	Master Protein Accessions	Protein Accessions	# Missed Cleavages	Charge	DeltaScore	DeltaCn	Rank	Search Engine Rank	m/z [Da]	MH+ [Da]	Theo. MH+ [Da]	DeltaM [ppm]	Deltam/z [Da]	Intensity	Activation Type	MS Order	Isolation Interference [%]	Ion Inject Time [ms]	RT [min]	First Scan	Spectrum File	XCorr	Percolator q-Value	Percolator PEP
	High	Sequest HT (A11)	Unambiguous	FQLGTVGALSLSVVSsVSIVIcNK	S16(Phospho); C22(Carbamidomethyl)	1	1	326530308	326530308	0	3	0.072	0	1	1	852.094	2554.27	2558.33	-1587.94	-1.35416	564027	CID (Collision Induced Dissociation)	MS2		1.961	75.971	26822	R_DC_WT_AB.raw	2.64	0.002006	0.04538
High	Master Protein	326501458	Name:"Similar to O1 Protein OPAQUE1 (Zea mays OX=4577)"	0.009	1.302	5.24476	1	1	1	1	286	32	9.89	2.55	1
	Confidence	Identifying Node	PSM Ambiguity	Annotated Sequence	Modifications	# Protein Groups	# Proteins	Master Protein Accessions	Protein Accessions	# Missed Cleavages	Charge	DeltaScore	DeltaCn	Rank	Search Engine Rank	m/z [Da]	MH+ [Da]	Theo. MH+ [Da]	DeltaM [ppm]	Deltam/z [Da]	Intensity	Activation Type	MS Order	Isolation Interference [%]	Ion Inject Time [ms]	RT [min]	First Scan	Spectrum File	XCorr	Percolator q-Value	Percolator PEP
	High	Sequest HT (A11)	Selected	sLQELLGMSLIILDK	S1(Phospho)	1	1	326501458	326501458	0	2		0.0377	3	3	877.345	1753.68	1752.92	433.57	0.38001	37217	CID (Collision Induced Dissociation)	MS2		38.833	86.3963	30686	R_DC_WT_AB.raw	2.55	0.002724	0.04994
High	Master Protein	326525104	Name:"Similar to LDOX Leucoanthocyanidin dioxygenase (Arabidopsis thaliana OX=3702)"	0.003	1.456	5.03145	1	1	1	1	477	51.4	6.1	2.07	1
	Confidence	Identifying Node	PSM Ambiguity	Annotated Sequence	Modifications	# Protein Groups	# Proteins	Master Protein Accessions	Protein Accessions	# Missed Cleavages	Charge	DeltaScore	DeltaCn	Rank	Search Engine Rank	m/z [Da]	MH+ [Da]	Theo. MH+ [Da]	DeltaM [ppm]	Deltam/z [Da]	Intensity	Activation Type	MS Order	Isolation Interference [%]	Ion Inject Time [ms]	RT [min]	First Scan	Spectrum File	XCorr	Percolator q-Value	Percolator PEP
	High	Sequest HT (A11)	Selected	LLAtVWAALGPGGAGLLAVsGVPR	T4(Phospho); S20(Phospho)	1	1	326525104	326525104	0	3	0.0145	0	1	1	801.593	2402.76	2406.23	-1442.11	-1.15669	157239	CID (Collision Induced Dissociation)	MS2		6.03	48.7357	16266	R_DC_WT_AB.raw	2.07	0.0007822	0.03499

## Sheet: ROOT WT_replicate 3
Phosphopeptides detected in the proteome of untreated wild type roots - replicate 3.
Protein FDR Confidence	Master	Accession	Description	Exp. q-value	Sum PEP Score	Coverage	# Peptides	# PSMs	# Unique Peptides	# Protein Groups	# AAs	MW [kDa]	calc. pI	Score Sequest HT	# Peptides Sequest HT
High	Master Protein	326494024	Name:"Similar to ACT1 Actin-1 (Oryza sativa subsp. japonica OX=39947)"	0	30.476	24.9337	7	17	3	1	377	41.8	5.49	53.43	7
	Confidence	Identifying Node	PSM Ambiguity	Annotated Sequence	Modifications	# Protein Groups	# Proteins	Master Protein Accessions	Protein Accessions	# Missed Cleavages	Charge	DeltaScore	DeltaCn	Rank	Search Engine Rank	m/z [Da]	MH+ [Da]	Theo. MH+ [Da]	DeltaM [ppm]	Deltam/z [Da]	Intensity	Activation Type	MS Order	Isolation Interference [%]	Ion Inject Time [ms]	RT [min]	First Scan	Spectrum File	XCorr	Percolator q-Value	Percolator PEP
	High	Sequest HT (A11)	Unambiguous	LSYIALDYDQEMETSK		1	2	326494024	326501816; 326494024	0	2	0.4943	0	1	1	953.846	1906.68	1905.88	422.93	0.40302	174248	CID (Collision Induced Dissociation)	MS2		7.078	60.1336	20823	R_DC_WT_B.raw	4.35	0	5.33e-05
	High	Sequest HT (A11)	Unambiguous	LSYIALDYDQEMETSK		1	2	326494024	326501816; 326494024	0	2	0.5615	0	1	1	953.429	1905.85	1905.88	-14.33	-0.01365	133831	CID (Collision Induced Dissociation)	MS2		20.128	61.2952	21271	R_DC_WT_B.raw	4.31	0	9.89e-06
	High	Sequest HT (A11)	Unambiguous	SYELPDGQVITIGSER		1	1	326494024	326494024	0	2	0.2792	0	1	1	883.428	1765.85	1763.88	1115.5	0.9838	428082	CID (Collision Induced Dissociation)	MS2		1.871	63.3092	22055	R_DC_WT_B.raw	3.08	0	0.005768
	High	Sequest HT (A11)	Unambiguous	SYELPDGQVITIGSER		1	1	326494024	326494024	0	2	0.4433	0	1	1	883.011	1765.02	1763.88	643.05	0.56713	329664	CID (Collision Induced Dissociation)	MS2		2.726	63.5342	22143	R_DC_WT_B.raw	3.88	0	2.515e-05
	High	Sequest HT (A11)	Unambiguous	TssSVEKSYELPDGQVITIGSER	S2(Phospho); S3(Phospho)	1	1	326494024	326494024	1	3	0.0639	0	1	1	882.428	2645.27	2642.16	1175.49	1.03528	360861	CID (Collision Induced Dissociation)	MS2		3.591	63.9072	22287	R_DC_WT_B.raw	2.66	0	0.002162
	High	Sequest HT (A11)	Unambiguous	SYELPDGQVITIGSER		1	1	326494024	326494024	0	2	0.5	0	1	1	882.428	1763.85	1763.88	-18.39	-0.01622	360861	CID (Collision Induced Dissociation)	MS2		3.591	63.9072	22287	R_DC_WT_B.raw	4.32	0	3.425e-05
	High	Sequest HT (A11)	Unambiguous	LSYIALDYDQEmETSK	M12(Oxidation)	1	2	326494024	326501816; 326494024	0	2	0.1637	0	1	1	961.346	1921.68	1921.87	-98.12	-0.09429	177145	CID (Collision Induced Dissociation)	MS2		12.396	53.2923	18138	R_DC_WT_B.raw	3.36	0	6.95e-05
	High	Sequest HT (A11)	Unambiguous	GYSFTTTAER		2	11	326488133; 326494024	326501816; 326516786; 326488133; 326530362; 326494024; 326490788; 326495636; 326524317; 326502758; 326529133; 326521830	0	2	0.5102	0	1	1	566.755	1132.5	1132.53	-21.09	-0.01194	1.67312e+06	CID (Collision Induced Dissociation)	MS2		0.68	25.886	7294	R_DC_WT_B.raw	2.94	0	0.003546
	High	Sequest HT (A11)	Unambiguous	EITALAPSSMK		2	6	326516064; 326494024	326501816; 326516786; 326516064; 326494024; 326495636; 1540331568	0	1	0.4135	0	1	1	1147.68	1147.68	1147.6	69.99	0.08033	235564	CID (Collision Induced Dissociation)	MS2		12.662	34.9009	10850	R_DC_WT_B.raw	2.66	0	0.001502
	High	Sequest HT (A11)	Selected	YPIEHGIVSNWDDMEK		2	5	326516064; 326494024	326501816; 326516786; 326516064; 326494024; 326495636	0	3		0	2	2	645.173	1933.51	1932.88	323.78	0.20861	338670	CID (Collision Induced Dissociation)	MS2		2.883	52.3335	17760	R_DC_WT_B.raw	2.53	0	0.008855
	High	Sequest HT (A11)	Unambiguous	EITALAPSSMK		2	6	326516064; 326494024	326501816; 326516786; 326516064; 326494024; 326495636; 1540331568	0	1	0.1977	0	1	1	1146.77	1146.77	1147.6	-728.79	-0.83636	235936	CID (Collision Induced Dissociation)	MS2		8.653	35.5886	11122	R_DC_WT_B.raw	1.72	0	0.007035
	High	Sequest HT (A11)	Unambiguous	LSYIALDYDQEmETSK	M12(Oxidation)	1	2	326494024	326501816; 326494024	0	2	0.3852	0	1	1	962.013	1923.02	1921.87	595.66	0.57239	162968	CID (Collision Induced Dissociation)	MS2		9.195	53.1239	18072	R_DC_WT_B.raw	4.18	0	6.239e-05
	High	Sequest HT (A11)	Unambiguous	VAPEEHPVLLTEAPLNPK		2	9	326516064; 326494024	326501816; 326516786; 326516064; 326530362; 326494024; 326495636; 326524317; 326529133; 326521830	0	3	0.2091	0	1	1	652.257	1954.76	1954.06	353.87	0.23049	1.22193e+06	CID (Collision Induced Dissociation)	MS2		0.738	46.6333	15500	R_DC_WT_B.raw	2.87	0	0.007982
	High	Sequest HT (A11)	Unambiguous	VAPEEHPVLLTEAPLNPK		2	9	326516064; 326494024	326501816; 326516786; 326516064; 326530362; 326494024; 326495636; 326524317; 326529133; 326521830	0	2	0.4436	0	1	1	977.43	1953.85	1954.06	-108.56	-0.10607	158633	CID (Collision Induced Dissociation)	MS2		9.63	46.5753	15479	R_DC_WT_B.raw	3.99	0	0.01049
	High	Sequest HT (A11)	Unambiguous	EITALAPSSMK		2	6	326516064; 326494024	326501816; 326516786; 326516064; 326494024; 326495636; 1540331568	0	2	0.2815	0	1	1	574.339	1147.67	1147.6	58.61	0.03363	3.68914e+06	CID (Collision Induced Dissociation)	MS2		0.33	35.1484	10946	R_DC_WT_B.raw	2.38	0.00259	0.03955
	High	Sequest HT (A11)	Selected	VAPEEHPVLLTEAPLNPK		2	9	326516064; 326494024	326501816; 326516786; 326516064; 326530362; 326494024; 326495636; 326524317; 326529133; 326521830	0	3		0.0136	2	2	651.34	1952.01	1954.06	-1053.48	-0.68619	462317	CID (Collision Induced Dissociation)	MS2		0.801	47.4535	15828	R_DC_WT_B.raw	2.17	0.00454	0.05472
	High	Sequest HT (A11)	Unambiguous	YPIEHGIVSNWDDMEK		2	5	326516064; 326494024	326501816; 326516786; 326516064; 326494024; 326495636	0	2	0.1422	0	1	1	966.513	1932.02	1932.88	-445.52	-0.43057	145776	CID (Collision Induced Dissociation)	MS2		10.735	52.3464	17766	R_DC_WT_B.raw	2.04	0.00597	0.06378
High	Master Protein	326493522	Name:"Similar to Phosphoglycerate kinase, cytosolic (Triticum aestivum OX=4565)"	0	25.972	28.4289	8	16	3	1	401	42.1	6.23	50.11	8
	Confidence	Identifying Node	PSM Ambiguity	Annotated Sequence	Modifications	# Protein Groups	# Proteins	Master Protein Accessions	Protein Accessions	# Missed Cleavages	Charge	DeltaScore	DeltaCn	Rank	Search Engine Rank	m/z [Da]	MH+ [Da]	Theo. MH+ [Da]	DeltaM [ppm]	Deltam/z [Da]	Intensity	Activation Type	MS Order	Isolation Interference [%]	Ion Inject Time [ms]	RT [min]	First Scan	Spectrum File	XCorr	Percolator q-Value	Percolator PEP
	High	Sequest HT (A11)	Rejected	YLRPAVAGFLMQK		1	1	326493522	326493522	0	3		0.0359	2	2	498.754	1494.25	1493.83	279.32	0.13909	900272	CID (Collision Induced Dissociation)	MS2		0.915	58.4392	20162	R_DC_WT_B.raw	4.83	0	0.00316
	High	Sequest HT (A11)	Unambiguous	LASVADLYVNDAFGTAHR		2	3	326493522; 326522650	28172913; 326493522; 326522650	0	3	0.3162	0	1	1	640.673	1920.01	1919.96	23.03	0.01474	827036	CID (Collision Induced Dissociation)	MS2		1.248	60.6581	21026	R_DC_WT_B.raw	2.72	0	0.0005942
	High	Sequest HT (A11)	Unambiguous	LASVADLYVNDAFGTAHR		2	3	326493522; 326522650	28172913; 326493522; 326522650	0	3	0.2986	0	1	1	640.311	1918.92	1919.96	-543.14	-0.3476	642490	CID (Collision Induced Dissociation)	MS2		1.498	60.7114	21046	R_DC_WT_B.raw	2.78	0	0.002777
	High	Sequest HT (A11)	Unambiguous	ELDYLVGAVADPK		1	1	326493522	326493522	0	2	0.2607	0	1	1	695.841	1390.67	1389.73	682.64	0.47434	961813	CID (Collision Induced Dissociation)	MS2		0.605	56.4767	19388	R_DC_WT_B.raw	3.99	0	0.003157
	High	Sequest HT (A11)	Unambiguous	IGVIESLLAK		2	3	326493522; 326522650	28172913; 326493522; 326522650	0	2	0.1958	0	1	1	521.921	1042.83	1042.65	176.44	0.09198	1.75043e+06	CID (Collision Induced Dissociation)	MS2		0.768	63.5779	22160	R_DC_WT_B.raw	3.32	0	0.001763
	High	Sequest HT (A11)	Unambiguous	TVIWNGPMGVFEFEK		2	3	326493522; 326522650	28172913; 326493522; 326522650	0	2	0.3343	0	1	1	878.428	1755.85	1753.86	1132.72	0.99331	106934	CID (Collision Induced Dissociation)	MS2		6.712	83.1191	29651	R_DC_WT_B.raw	3.44	0	0.0007187
	High	Sequest HT (A11)	Unambiguous	TVIWNGPMGVFEFEK		2	3	326493522; 326522650	28172913; 326493522; 326522650	0	2	0.3962	0	1	1	877.928	1754.85	1753.86	562.53	0.4933	128716	CID (Collision Induced Dissociation)	MS2		12.441	84.0313	29992	R_DC_WT_B.raw	4.19	0	0.0003715
	High	Sequest HT (A11)	Unambiguous	TVIWNGPMGVFEFEK		2	3	326493522; 326522650	28172913; 326493522; 326522650	0	2	0.2303	0	1	1	876.844	1752.68	1753.86	-672.86	-0.59005	84884.9	CID (Collision Induced Dissociation)	MS2		19.718	84.2571	30077	R_DC_WT_B.raw	3.17	0	0.0001721
	High	Sequest HT (A11)	Unambiguous	FAAGTDAIAK		2	3	326493522; 326522650	28172913; 326493522; 326522650	0	2	0.3459	0	1	1	482.754	964.5	964.51	-10.4	-0.00501	2.00124e+06	CID (Collision Induced Dissociation)	MS2		0.558	22.4248	5943	R_DC_WT_B.raw	2.66	0	0.003806
	High	Sequest HT (A11)	Unambiguous	KPFAAIVGGSK		2	3	326493522; 326522650	28172913; 326493522; 326522650	0	1	0.3763	0	1	1	1074.6	1074.6	1074.63	-30.05	-0.03229	98510.4	CID (Collision Induced Dissociation)	MS2		26.709	22.6009	6011	R_DC_WT_B.raw	2.87	0	0.008472
	High	Sequest HT (A11)	Unambiguous	YLRPAVAGFLmQK	M11(Oxidation)	1	1	326493522	326493522	0	3	0.1047	0	1	1	504.337	1511	1509.82	776.69	0.39089	396920	CID (Collision Induced Dissociation)	MS2		4.032	52.5918	17861	R_DC_WT_B.raw	2.58	0.0002083	0.01335
	High	Sequest HT (A11)	Unambiguous	LADITAQGVTtIIGGGDSVAAVEK	T11(Phospho)	1	1	326493522	326493522	0	3	0.0962	0	1	1	788.343	2363.01	2366.19	-1340.25	-1.05709	910809	CID (Collision Induced Dissociation)	MS2		1.461	46.7363	15542	R_DC_WT_B.raw	2.91	0.0004017	0.01838
	High	Sequest HT (A11)	Unambiguous	FAAGTDAIAK		2	3	326493522; 326522650	28172913; 326493522; 326522650	0	1	0.2707	0	1	1	964.43	964.43	964.51	-83.26	-0.0803	184305	CID (Collision Induced Dissociation)	MS2		13.726	22.2588	5881	R_DC_WT_B.raw	1.81	0.000746	0.02627
	High	Sequest HT (A11)	Unambiguous	LASVADLYVNDAFGTAHR		2	3	326493522; 326522650	28172913; 326493522; 326522650	0	2	0.0533	0	1	1	960.929	1920.85	1919.96	463.88	0.44531	146563	CID (Collision Induced Dissociation)	MS2		9.858	60.2641	20874	R_DC_WT_B.raw	2.44	0.0009234	0.02851
	High	Sequest HT (A11)	Rejected	YLRPAVAGFLMQK		1	1	326493522	326493522	0	3	0.0108	0	1	1	498.421	1493.25	1493.83	-390.11	-0.19425	143567	CID (Collision Induced Dissociation)	MS2		4.764	60.0745	20799	R_DC_WT_B.raw	3.69	0.0009234	0.02869
	High	Sequest HT (A11)	Unambiguous	IGVIESLLAK		2	3	326493522; 326522650	28172913; 326493522; 326522650	0	2	0.0623	0	1	1	522.338	1043.67	1042.65	975.7	0.50866	134500	CID (Collision Induced Dissociation)	MS2		15.346	65.0067	22716	R_DC_WT_B.raw	2.73	0.006537	0.07363
High	Master Protein	326492858	Name:"Similar to GAD Glutamate decarboxylase (Petunia hybrida OX=4102)"	0	18.287	17.7165	7	9	6	1	508	57.2	7.52	30.79	7
	Confidence	Identifying Node	PSM Ambiguity	Annotated Sequence	Modifications	# Protein Groups	# Proteins	Master Protein Accessions	Protein Accessions	# Missed Cleavages	Charge	DeltaScore	DeltaCn	Rank	Search Engine Rank	m/z [Da]	MH+ [Da]	Theo. MH+ [Da]	DeltaM [ppm]	Deltam/z [Da]	Intensity	Activation Type	MS Order	Isolation Interference [%]	Ion Inject Time [ms]	RT [min]	First Scan	Spectrum File	XCorr	Percolator q-Value	Percolator PEP
	High	Sequest HT (A11)	Unambiguous	NYVDMDEYPVTTELQNR		1	5	326492858	326517874; 326519016; 326512720; 326492858; 326503536	0	2	0.0761	0	1	1	1044.43	2087.85	2086.94	439.04	0.45812	143837	CID (Collision Induced Dissociation)	MS2		16.866	59.2552	20479	R_DC_WT_B.raw	5.65	0	1.096e-05
	High	Sequest HT (A11)	Unambiguous	NYVDMDEYPVTTELQNR		1	5	326492858	326517874; 326519016; 326512720; 326492858; 326503536	0	2	0.1965	0	1	1	1043.6	2086.19	2086.94	-359.6	-0.37523	129868	CID (Collision Induced Dissociation)	MS2		20.753	60.3243	20897	R_DC_WT_B.raw	4.63	0	0.001852
	High	Sequest HT (A11)	Unambiguous	GSSQVIAQYYQLIR		1	2	326492858	326492858; 326503536	0	2	0.2461	0	1	1	813.927	1626.85	1625.86	603.59	0.49068	272504	CID (Collision Induced Dissociation)	MS2		8.157	66.2353	23192	R_DC_WT_B.raw	3.21	0	0.001169
	High	Sequest HT (A11)	Unambiguous	EAAYQIINDELMLDGNPR		1	3	326492858	326517874; 326492858; 326503536	0	2	0.3626	0	1	1	1032.43	2063.85	2061.99	903.69	0.9317	106683	CID (Collision Induced Dissociation)	MS2		18.539	74.5008	26378	R_DC_WT_B.raw	3.64	0	8.627e-05
	High	Sequest HT (A11)	Unambiguous	EAAYQIINDELMLDGNPR		1	3	326492858	326517874; 326492858; 326503536	0	2	0.3504	0	1	1	1031.51	2062.02	2061.99	14.57	0.01502	93007.8	CID (Collision Induced Dissociation)	MS2		26.306	74.6584	26439	R_DC_WT_B.raw	3.71	0	0.0001652
	High	Sequest HT (A11)	Unambiguous	YFEVELK		2	8	31296711; 326492858	326517874; 326514436; 326519016; 55832255; 31296711; 326512720; 326492858; 326503536	0	2	0.1009	0	1	1	464.337	927.666	927.482	197.89	0.09177	330561	CID (Collision Induced Dissociation)	MS2		4.619	43.2846	14170	R_DC_WT_B.raw	2.18	0.0002083	0.01672
	High	Sequest HT (A11)	Unambiguous	LSEGYYVMDPEK		1	1	326492858	326492858	0	2	0.1169	0	1	1	716.341	1431.68	1430.65	716.24	0.51234	367455	CID (Collision Induced Dissociation)	MS2		6.972	42.2414	13759	R_DC_WT_B.raw	2.31	0.0004017	0.01814
	High	Sequest HT (A11)	Selected	NIMDNcQENAMVLK	C6(Carbamidomethyl)	1	1	326492858	326492858	0	2	0.0039	0	1	1	840.677	1680.35	1679.75	352.43	0.296	179898	CID (Collision Induced Dissociation)	MS2		7.279	46.388	15403	R_DC_WT_B.raw	2.59	0.0009234	0.02859
	High	Sequest HT (A11)	Unambiguous	LmmDsINKNYVDMDEYPVTTELQNR	M2(Oxidation); M3(Oxidation); S5(Phospho)	1	1	326492858	326492858	1	3	0.0662	0	1	1	1044.43	3131.28	3131.34	-19.83	-0.0207	143837	CID (Collision Induced Dissociation)	MS2		16.866	59.2552	20479	R_DC_WT_B.raw	2.87	0.00454	0.05386
High	Master Protein	326505528	Name:"Similar to MIC60 MICOS complex subunit MIC60 (Lodderomyces elongisporus (strain ATCC 11503 / CBS 2605 / JCM 1781 / NBRC 1676 / NRRL YB-4239) OX=379508)"	0	7.234	4.29752	2	3	2	1	605	66	5.16	11.72	2
	Confidence	Identifying Node	PSM Ambiguity	Annotated Sequence	Modifications	# Protein Groups	# Proteins	Master Protein Accessions	Protein Accessions	# Missed Cleavages	Charge	DeltaScore	DeltaCn	Rank	Search Engine Rank	m/z [Da]	MH+ [Da]	Theo. MH+ [Da]	DeltaM [ppm]	Deltam/z [Da]	Intensity	Activation Type	MS Order	Isolation Interference [%]	Ion Inject Time [ms]	RT [min]	First Scan	Spectrum File	XCorr	Percolator q-Value	Percolator PEP
	High	Sequest HT (A11)	Unambiguous	LALGTLAFEEALSSGSPIR		1	1	326505528	326505528	0	2	0.5573	0	1	1	967.013	1933.02	1932.04	504.57	0.48743	105244	CID (Collision Induced Dissociation)	MS2		17.451	84.9005	30320	R_DC_WT_B.raw	5.15	0	3.285e-06
	High	Sequest HT (A11)	Unambiguous	LALGTLAFEEALSSGSPIR		1	1	326505528	326505528	0	2	0.4778	0	1	1	966.013	1931.02	1932.04	-530.62	-0.51259	72824.6	CID (Collision Induced Dissociation)	MS2		13.733	85.0561	30377	R_DC_WT_B.raw	3.83	0	0.0001445
	High	Sequest HT (A11)	Unambiguous	QsHsVHKLALGTLAFEEALSSGSPIR	S2(Phospho); S4(Phospho)	1	1	326505528	326505528	1	3	0.0691	0	1	1	967.013	2899.02	2895.38	1258.55	1.21466	105244	CID (Collision Induced Dissociation)	MS2		17.451	84.9005	30320	R_DC_WT_B.raw	2.75	0.0004017	0.01778
High	Master Protein	326516268	Name:"Similar to AHL5 AT-hook motif nuclear-localized protein 5 (Arabidopsis thaliana OX=3702)"	0.002	1.689	5.40541	1	1	1	1	555	56.6	6.96	3.56	1
	Confidence	Identifying Node	PSM Ambiguity	Annotated Sequence	Modifications	# Protein Groups	# Proteins	Master Protein Accessions	Protein Accessions	# Missed Cleavages	Charge	DeltaScore	DeltaCn	Rank	Search Engine Rank	m/z [Da]	MH+ [Da]	Theo. MH+ [Da]	DeltaM [ppm]	Deltam/z [Da]	Intensity	Activation Type	MS Order	Isolation Interference [%]	Ion Inject Time [ms]	RT [min]	First Scan	Spectrum File	XCorr	Percolator q-Value	Percolator PEP
	High	Sequest HT (A11)	Unambiguous	VIGGtVSGVLtAAGTVQVIVGSFmYGGGTK	T5(Phospho); T11(Phospho); M24(Oxidation)	1	1	326516268	326516268	0	3	0.118	0	1	1	1002.6	3005.78	3002.43	1112.98	1.11388	144138	CID (Collision Induced Dissociation)	MS2		11.982	37.6238	11933	R_DC_WT_B.raw	3.56	0.0005694	0.02048
High	Master Protein	326500798	Name:"Similar to OFUT35 O-fucosyltransferase 35 (Arabidopsis thaliana OX=3702)"	0.002	1.719	2.66876	1	1	1	1	637	70.9	7.62	2.53	1
	Confidence	Identifying Node	PSM Ambiguity	Annotated Sequence	Modifications	# Protein Groups	# Proteins	Master Protein Accessions	Protein Accessions	# Missed Cleavages	Charge	DeltaScore	DeltaCn	Rank	Search Engine Rank	m/z [Da]	MH+ [Da]	Theo. MH+ [Da]	DeltaM [ppm]	Deltam/z [Da]	Intensity	Activation Type	MS Order	Isolation Interference [%]	Ion Inject Time [ms]	RT [min]	First Scan	Spectrum File	XCorr	Percolator q-Value	Percolator PEP
	High	Sequest HT (A11)	Selected	sNGyILINANGGLNQmR	S1(Phospho); Y4(Phospho); M16(Oxidation)	1	1	326500798	326500798	0	2		0.0117	3	3	1006.23	2011.46	2010.85	304.49	0.30614	122634	CID (Collision Induced Dissociation)	MS2		9.076	69.6298	24507	R_DC_WT_B.raw	2.53	0.0004017	0.01911
High	Master Protein	326512540	Name:"Similar to hemW Heme chaperone HemW (Synechocystis sp. (strain PCC 6803 / Kazusa) OX=1111708)"	0.006	1.473	5.89474	1	1	1	1	475	52.2	6.47	0	1
	Confidence	Identifying Node	PSM Ambiguity	Annotated Sequence	Modifications	# Protein Groups	# Proteins	Master Protein Accessions	Protein Accessions	# Missed Cleavages	Charge	DeltaScore	DeltaCn	Rank	Search Engine Rank	m/z [Da]	MH+ [Da]	Theo. MH+ [Da]	DeltaM [ppm]	Deltam/z [Da]	Intensity	Activation Type	MS Order	Isolation Interference [%]	Ion Inject Time [ms]	RT [min]	First Scan	Spectrum File	XCorr	Percolator q-Value	Percolator PEP
	High	Sequest HT (A11)	Unambiguous	CHYCDFPIVALGSsAssPGGSGSGEDPR	S14(Phospho); S16(Phospho); S17(Phospho)	1	1	326512540	326512540	0	2	0.0947	0	1	1	1497.94	2994.87	2993.09	594.84	0.8902	164094	CID (Collision Induced Dissociation)	MS2		11.74	29.2434	8622	R_DC_WT_B.raw	0.95	0.001782	0.03367

## Sheet: ROOT KO_replicate 1
Phosphopeptides detected in the proteome of untreated HvMPK3 KO roots - replicate 1.
Protein FDR Confidence	Master	Accession	Description	Exp. q-value	Sum PEP Score	Coverage	# Peptides	# PSMs	# Unique Peptides	# Protein Groups	# AAs	MW [kDa]	calc. pI	Score Sequest HT	# Peptides Sequest HT
High	Master Protein	326494024	Name:"Similar to ACT1 Actin-1 (Oryza sativa subsp. japonica OX=39947)"	0	33.334	32.8912	8	19	3	1	377	41.8	5.49	62.35	8
	Confidence	Identifying Node	PSM Ambiguity	Annotated Sequence	Modifications	# Protein Groups	# Proteins	Master Protein Accessions	Protein Accessions	# Missed Cleavages	Charge	DeltaScore	DeltaCn	Rank	Search Engine Rank	m/z [Da]	MH+ [Da]	Theo. MH+ [Da]	DeltaM [ppm]	Deltam/z [Da]	Intensity	Activation Type	MS Order	Isolation Interference [%]	Ion Inject Time [ms]	RT [min]	First Scan	Spectrum File	XCorr	Percolator q-Value	Percolator PEP
	High	Sequest HT (A11)	Unambiguous	SYELPDGQVITIGSER		1	1	326494024	326494024	0	2	0.5879	0	1	1	882.511	1764.02	1763.88	76.1	0.06712	671890	CID (Collision Induced Dissociation)	MS2		2.53	63.8457	22304	R_DC_KO_A.raw	4.95	0	5.142e-06
	High	Sequest HT (A11)	Unambiguous	TssSVEKSYELPDGQVITIGSER	S2(Phospho); S3(Phospho)	1	1	326494024	326494024	1	3	0.0733	0	1	1	882.511	2645.52	2642.16	1270.11	1.11861	671890	CID (Collision Induced Dissociation)	MS2		2.53	63.8457	22304	R_DC_KO_A.raw	3	0	0.006929
	High	Sequest HT (A11)	Unambiguous	SYELPDGQVITIGSER		1	1	326494024	326494024	0	2	0.5584	0	1	1	881.928	1762.85	1763.88	-585.33	-0.51623	148795	CID (Collision Induced Dissociation)	MS2		4.501	64.0916	22400	R_DC_KO_A.raw	4.28	0	2.343e-05
	High	Sequest HT (A11)	Unambiguous	TssSVEKSYELPDGQVITIGSER	S2(Phospho); S3(Phospho)	1	1	326494024	326494024	1	3	0.0077	0	1	1	881.928	2643.77	2642.16	607.76	0.53527	148795	CID (Collision Induced Dissociation)	MS2		4.501	64.0916	22400	R_DC_KO_A.raw	2.59	0.0003797	0.01825
	High	Sequest HT (A11)	Unambiguous	TSSsVEKsYELPDGQVITIGSER	S4(Phospho); S8(Phospho)	1	1	326494024	326494024	1	3		0.0077	2	2	881.928	2643.77	2642.16	607.76	0.53527	148795	CID (Collision Induced Dissociation)	MS2		4.501	64.0916	22400	R_DC_KO_A.raw	2.57	0.005015	0.06233
	High	Sequest HT (A11)	Unambiguous	TTGIVLDSGDGVSHTVPIYEGYALPHAILR		3	6	326516786; 326516064; 326494024	326501816; 326516786; 326516064; 326494024; 326490788; 326495636	0	3	0.2786	0	1	1	1051.6	3152.78	3151.64	360.71	0.37894	552344	CID (Collision Induced Dissociation)	MS2		5.09	72.4197	25635	R_DC_KO_A.raw	3.59	0.0001993	0.01614
	High	Sequest HT (A11)	Unambiguous	LSYIALDYDQEMETSK		1	2	326494024	326501816; 326494024	0	2	0.3798	0	1	1	954.346	1907.68	1905.88	947.63	0.90303	167049	CID (Collision Induced Dissociation)	MS2		4.415	60.8829	21143	R_DC_KO_A.raw	4.95	0	2.125e-05
	High	Sequest HT (A11)	Unambiguous	GYSFTTTAER		2	11	326516786; 326494024	326501816; 326516786; 326488133; 326530362; 326494024; 326490788; 326495636; 326524317; 326502758; 326529133; 326521830	0	2	0.443	0	1	1	567.255	1133.5	1132.53	861.91	0.48807	990903	CID (Collision Induced Dissociation)	MS2		0.662	25.6197	7203	R_DC_KO_A.raw	3.07	0.0003797	0.0203
	High	Sequest HT (A11)	Unambiguous	GYSFTTTAER		2	11	326516786; 326494024	326501816; 326516786; 326488133; 326530362; 326494024; 326490788; 326495636; 326524317; 326502758; 326529133; 326521830	0	2	0.481	0	1	1	566.838	1132.67	1132.53	126.08	0.07139	1.43293e+06	CID (Collision Induced Dissociation)	MS2		0.665	25.6657	7222	R_DC_KO_A.raw	3.16	0	0.001378
	High	Sequest HT (A11)	Unambiguous	GYSFTTTAER		2	11	326516786; 326494024	326501816; 326516786; 326488133; 326530362; 326494024; 326490788; 326495636; 326524317; 326502758; 326529133; 326521830	0	2	0.4457	0	1	1	566.005	1131	1132.53	-1345.59	-0.76196	282540	CID (Collision Induced Dissociation)	MS2		0.864	26.2223	7441	R_DC_KO_A.raw	2.58	0	0.009278
	High	Sequest HT (A11)	Unambiguous	EITALAPSSMK		4	6	326516786; 326516064; 326494024; 1540331568	326501816; 326516786; 326516064; 326494024; 326495636; 1540331568	0	1	0.5183	0	1	1	1147.77	1147.77	1147.6	142.61	0.16366	227083	CID (Collision Induced Dissociation)	MS2		10.038	34.8445	10851	R_DC_KO_A.raw	3.01	0	0.006483
	High	Sequest HT (A11)	Unambiguous	EITALAPSSMK		4	6	326516786; 326516064; 326494024; 1540331568	326501816; 326516786; 326516064; 326494024; 326495636; 1540331568	0	2	0.3029	0	1	1	574.255	1147.5	1147.6	-86.62	-0.0497	2004453	CID (Collision Induced Dissociation)	MS2		0.725	35.2256	11001	R_DC_KO_A.raw	2.41	0.0001993	0.01127
	High	Sequest HT (A11)	Unambiguous	VAPEEHPVLLTEAPLNPK		3	9	326516786; 326516064; 326494024	326501816; 326516786; 326516064; 326530362; 326494024; 326495636; 326524317; 326529133; 326521830	0	2	0.5041	0	1	1	978.096	1955.19	1954.06	573.79	0.56061	194200	CID (Collision Induced Dissociation)	MS2		8.494	46.8337	15597	R_DC_KO_A.raw	3.63	0	0.009019
	High	Sequest HT (A11)	Selected	VAPEEHPVLLTEAPLNPK		3	9	326516786; 326516064; 326494024	326501816; 326516786; 326516064; 326530362; 326494024; 326495636; 326524317; 326529133; 326521830	0	3	0.0342	0	1	1	652.007	1954.01	1954.06	-29.95	-0.01951	2.10689e+06	CID (Collision Induced Dissociation)	MS2		0.432	46.91	15626	R_DC_KO_A.raw	2.34	0.006606	0.07473
	High	Sequest HT (A11)	Unambiguous	YPIEHGIVSNWDDMEK		3	5	326516786; 326516064; 326494024	326501816; 326516786; 326516064; 326494024; 326495636	0	2	0.4831	0	1	1	967.346	1933.69	1932.88	416.77	0.40278	248182	CID (Collision Induced Dissociation)	MS2		9.047	52.1974	17725	R_DC_KO_A.raw	3.56	0	0.0006192
	High	Sequest HT (A11)	Unambiguous	YPIEHGIVSNWDDMEK		3	5	326516786; 326516064; 326494024	326501816; 326516786; 326516064; 326494024; 326495636	0	3	0.1834	0	1	1	645.84	1935.51	1932.88	1358.53	0.87529	627726	CID (Collision Induced Dissociation)	MS2		1.163	52.5847	17877	R_DC_KO_A.raw	3.49	0.0001993	0.01357
	High	Sequest HT (A11)	Unambiguous	LSYIALDYDQEmETSK	M12(Oxidation)	1	2	326494024	326501816; 326494024	0	2	0.1922	0	1	1	961.846	1922.68	1921.87	422.21	0.40572	212709	CID (Collision Induced Dissociation)	MS2		8.11	52.9193	18011	R_DC_KO_A.raw	2.81	0.002347	0.03694
	High	Sequest HT (A11)	Unambiguous	LSYIALDYDQEmETSK	M12(Oxidation)	1	2	326494024	326501816; 326494024	0	2	0.263	0	1	1	961.346	1921.68	1921.87	-98.12	-0.09429	261348	CID (Collision Induced Dissociation)	MS2		7.863	53.4735	18229	R_DC_KO_A.raw	3.08	0	0.001104
	High	Sequest HT (A11)	Unambiguous	LSYIALDYDQEMETSK		1	2	326494024	326501816; 326494024	0	2	0.5843	0	1	1	953.929	1906.85	1905.88	510.38	0.48636	293683	CID (Collision Induced Dissociation)	MS2		3.791	60.9187	21157	R_DC_KO_A.raw	5.87	0	1.279e-06
High	Master Protein	326502638	Name:"Similar to PER52 Peroxidase 52 (Arabidopsis thaliana OX=3702)"	0	36.667	52.4845	11	18	11	1	322	34.1	9.39	58.48	11
	Confidence	Identifying Node	PSM Ambiguity	Annotated Sequence	Modifications	# Protein Groups	# Proteins	Master Protein Accessions	Protein Accessions	# Missed Cleavages	Charge	DeltaScore	DeltaCn	Rank	Search Engine Rank	m/z [Da]	MH+ [Da]	Theo. MH+ [Da]	DeltaM [ppm]	Deltam/z [Da]	Intensity	Activation Type	MS Order	Isolation Interference [%]	Ion Inject Time [ms]	RT [min]	First Scan	Spectrum File	XCorr	Percolator q-Value	Percolator PEP
	High	Sequest HT (A11)	Unambiguous	SGMTSALQTER		1	1	326502638	326502638	0	2	0.2853	0	1	1	590.756	1180.5	1180.56	-49.71	-0.02935	323208	CID (Collision Induced Dissociation)	MS2		3.639	21.6863	5660	R_DC_KO_A.raw	3.12	0	0.005938
	High	Sequest HT (A11)	Unambiguous	ATVScADILALAAR	C5(Carbamidomethyl)	1	1	326502638	326502638	0	3	0.1154	0	1	1	478.67	1434	1431.76	1559.89	0.74446	104289	CID (Collision Induced Dissociation)	MS2		10.207	63.7278	22259	R_DC_KO_A.raw	2.86	0.002212	0.03469
	High	Sequest HT (A11)	Unambiguous	ATVScADILALAAR	C5(Carbamidomethyl)	1	1	326502638	326502638	0	2	0.4845	0	1	1	716.425	1431.84	1431.76	55.69	0.03987	536978	CID (Collision Induced Dissociation)	MS2		1.649	64.3068	22485	R_DC_KO_A.raw	3.55	0	0.0001767
	High	Sequest HT (A11)	Unambiguous	LFFHDcFVNGcDGSILLDDTSTLTGEK	C6(Carbamidomethyl); C11(Carbamidomethyl)	1	1	326502638	326502638	0	3	0.5189	0	1	1	1021.43	3062.28	3061.39	289.26	0.29518	252279	CID (Collision Induced Dissociation)	MS2		9.22	81.2818	29036	R_DC_KO_A.raw	6.61	0	4.679e-07
	High	Sequest HT (A11)	Unambiguous	DGVNLLGGPTWSVPLGR		1	1	326502638	326502638	0	2	0.3981	0	1	1	869.261	1737.51	1737.93	-237.93	-0.20675	79995	CID (Collision Induced Dissociation)	MS2		9.294	82.4495	29480	R_DC_KO_A.raw	3.14	0.002904	0.04413
	High	Sequest HT (A11)	Unambiguous	QYSSSPGQFSADFVTAMLK		1	1	326502638	326502638	0	2	0.4494	0	1	1	1032.35	2063.69	2063.97	-138.83	-0.14327	143418	CID (Collision Induced Dissociation)	MS2		15.554	82.475	29489	R_DC_KO_A.raw	3.36	0	0.0005411
	High	Sequest HT (A11)	Unambiguous	DGVNLLGGPTWSVPLGR		1	1	326502638	326502638	0	2	0.0826	0	1	1	870.011	1739.01	1737.93	625.19	0.54326	92266.4	CID (Collision Induced Dissociation)	MS2		15.737	83.8886	30030	R_DC_KO_A.raw	2.3	0.003766	0.05228
	High	Sequest HT (A11)	Unambiguous	QYSSSPGQFSADFVTAMLK		1	1	326502638	326502638	0	2	0.1746	0	1	1	1032.76	2064.52	2063.97	264.93	0.2734	131074	CID (Collision Induced Dissociation)	MS2		10.655	83.9096	30038	R_DC_KO_A.raw	2.52	0.0001993	0.01209
	High	Sequest HT (A11)	Unambiguous	SGGGSSLAPLDAQTADGFDNAYYR		1	1	326502638	326502638	0	3	0.0602	0	1	1	812.427	2435.27	2433.1	891.81	0.72329	207823	CID (Collision Induced Dissociation)	MS2		8.536	62.2107	21664	R_DC_KO_A.raw	2.66	0.00075	0.02242
	High	Sequest HT (A11)	Unambiguous	SGGGSSLAPLDAQTADGFDNAYYR		1	1	326502638	326502638	0	2	0.5303	0	1	1	1217.93	2434.86	2433.1	725.92	0.88312	112047	CID (Collision Induced Dissociation)	MS2		13.067	61.4352	21361	R_DC_KO_A.raw	4.79	0	5.638e-06
	High	Sequest HT (A11)	Unambiguous	SGMTSALQTER		1	1	326502638	326502638	0	2	0.3432	0	1	1	590.922	1180.84	1180.56	232.64	0.13732	440091	CID (Collision Induced Dissociation)	MS2		2.828	23.0635	6196	R_DC_KO_A.raw	3.38	0	0.002607
	High	Sequest HT (A11)	Selected	SGMTSALQTER		1	1	326502638	326502638	0	2		0.0191	2	2	590.339	1179.67	1180.56	-755.61	-0.44602	386115	CID (Collision Induced Dissociation)	MS2		3.087	23.4687	6358	R_DC_KO_A.raw	2.05	0.003189	0.04836
	High	Sequest HT (A11)	Unambiguous	DMTALSGAHTIGR		1	1	326502638	326502638	0	2	0.4497	0	1	1	665.34	1329.67	1329.66	11.7	0.00778	584050	CID (Collision Induced Dissociation)	MS2		3.546	30.495	9130	R_DC_KO_A.raw	3.78	0	0.0005247
	High	Sequest HT (A11)	Unambiguous	NLsPRDmTALSGAHTIGR	S3(Phospho); M7(Oxidation)	1	1	326502638	326502638	1	3	0.1064	0	1	1	665.34	1994.01	1992.93	539.18	0.35818	584050	CID (Collision Induced Dissociation)	MS2		3.546	30.495	9130	R_DC_KO_A.raw	2.82	0.004895	0.06057
	High	Sequest HT (A11)	Unambiguous	ScPNLASIVR	C2(Carbamidomethyl)	1	1	326502638	326502638	0	2	0.2191	0	1	1	559.255	1117.5	1116.58	823.72	0.45987	1.15093e+06	CID (Collision Induced Dissociation)	MS2		0.968	39.411	12657	R_DC_KO_A.raw	1.78	0.0001993	0.01114
	High	Sequest HT (A11)	Unambiguous	GLLHSDQELFNGGSQDSLVR		1	1	326502638	326502638	0	3	0.3177	0	1	1	725.008	2173.01	2172.07	433.74	0.31404	544917	CID (Collision Induced Dissociation)	MS2		2.231	54.1349	18489	R_DC_KO_A.raw	4.06	0	0.002896
	High	Sequest HT (A11)	Unambiguous	GLLHSDQELFNGGSQDSLVR		1	1	326502638	326502638	0	3	0.1976	0	1	1	724.258	2170.76	2172.07	-602.15	-0.43597	105777	CID (Collision Induced Dissociation)	MS2		3.467	54.8037	18753	R_DC_KO_A.raw	3.34	0.005015	0.06323
	High	Sequest HT (A11)	Unambiguous	GFDVIDAIK		1	1	326502638	326502638	0	2	0.3655	0	1	1	489.254	977.5	977.53	-30.87	-0.01509	492905	CID (Collision Induced Dissociation)	MS2		1.572	59.5301	20612	R_DC_KO_A.raw	2.38	0	0.009297
High	Master Protein	326512756	Name:"Similar to MED36B Probable mediator of RNA polymerase II transcription subunit 36b (Arabidopsis thaliana OX=3702)"	0	14.202	30.1653	5	8	5	1	242	26.4	9.06	27.23	5
	Confidence	Identifying Node	PSM Ambiguity	Annotated Sequence	Modifications	# Protein Groups	# Proteins	Master Protein Accessions	Protein Accessions	# Missed Cleavages	Charge	DeltaScore	DeltaCn	Rank	Search Engine Rank	m/z [Da]	MH+ [Da]	Theo. MH+ [Da]	DeltaM [ppm]	Deltam/z [Da]	Intensity	Activation Type	MS Order	Isolation Interference [%]	Ion Inject Time [ms]	RT [min]	First Scan	Spectrum File	XCorr	Percolator q-Value	Percolator PEP
	High	Sequest HT (A11)	Unambiguous	ANcIDSTQAAEAVFASEVEK	C3(Carbamidomethyl)	1	1	326512756	326512756	0	2	0.3411	0	1	1	1071.76	2142.52	2139.99	1185.19	1.26814	351900	CID (Collision Induced Dissociation)	MS2		12.037	65.897	23105	R_DC_KO_A.raw	3.87	0	0.0001955
	High	Sequest HT (A11)	Selected	NGGHFVIsIKANCIDSTQAAEAVFASEVEK	S8(Phospho)	1	1	326512756	326512756	1	3		0.0488	2	2	1071.76	3213.28	3215.51	-692.78	-0.74255	351900	CID (Collision Induced Dissociation)	MS2		12.037	65.897	23105	R_DC_KO_A.raw	3.12	0.005415	0.06651
	High	Sequest HT (A11)	Unambiguous	ANcIDSTQAAEAVFASEVEK	C3(Carbamidomethyl)	1	1	326512756	326512756	0	2	0.4541	0	1	1	1071.35	2141.69	2139.99	795.77	0.85147	169192	CID (Collision Induced Dissociation)	MS2		10.179	66.5545	23362	R_DC_KO_A.raw	4.36	0	6.985e-06
	High	Sequest HT (A11)	Selected	NGGHFVIsIKANCIDSTQAAEAVFASEVEK	S8(Phospho)	1	1	326512756	326512756	1	3	0.0472	0	1	1	1071.35	3212.03	3215.51	-1081.53	-1.15922	169192	CID (Collision Induced Dissociation)	MS2		10.179	66.5545	23362	R_DC_KO_A.raw	3.18	0.006606	0.07452
	High	Sequest HT (A11)	Unambiguous	ANcIDSTQAAEAVFASEVEK	C3(Carbamidomethyl)	1	1	326512756	326512756	0	2	0.2492	0	1	1	1070.1	2139.19	2139.99	-372.48	-0.39855	383106	CID (Collision Induced Dissociation)	MS2		9.851	66.8664	23484	R_DC_KO_A.raw	3.33	0	0.001134
	High	Sequest HT (A11)	Unambiguous	ILALNASYFLK		1	1	326512756	326512756	0	2	0.4246	0	1	1	627.423	1253.84	1252.73	885.06	0.55437	234118	CID (Collision Induced Dissociation)	MS2		2.676	71.775	25389	R_DC_KO_A.raw	3.58	0	0.000913
	High	Sequest HT (A11)	Selected	NMVAGESVYGEK		1	1	326512756	326512756	0	2	0.0141	0	1	1	642.507	1284.01	1283.59	321.24	0.20617	180135	CID (Collision Induced Dissociation)	MS2		2.954	25.0271	6973	R_DC_KO_A.raw	2.13	0.0001993	0.01144
	High	Sequest HT (A11)	Unambiguous	MLVGMVDVIFSDVAQPDQAR		1	1	326512756	326512756	0	3	0.2071	0	1	1	731.258	2191.76	2191.09	306.64	0.22396	44225	CID (Collision Induced Dissociation)	MS2		22.835	92.1563	33155	R_DC_KO_A.raw	3.67	0	0.001293
High	Master Protein	326505528	Name:"Similar to MIC60 MICOS complex subunit MIC60 (Lodderomyces elongisporus (strain ATCC 11503 / CBS 2605 / JCM 1781 / NBRC 1676 / NRRL YB-4239) OX=379508)"	0	10.002	6.44628	3	5	3	1	605	66	5.16	17.78	3
	Confidence	Identifying Node	PSM Ambiguity	Annotated Sequence	Modifications	# Protein Groups	# Proteins	Master Protein Accessions	Protein Accessions	# Missed Cleavages	Charge	DeltaScore	DeltaCn	Rank	Search Engine Rank	m/z [Da]	MH+ [Da]	Theo. MH+ [Da]	DeltaM [ppm]	Deltam/z [Da]	Intensity	Activation Type	MS Order	Isolation Interference [%]	Ion Inject Time [ms]	RT [min]	First Scan	Spectrum File	XCorr	Percolator q-Value	Percolator PEP
	High	Sequest HT (A11)	Unambiguous	LALGTLAFEEALSSGSPIR		1	1	326505528	326505528	0	2	0.4271	0	1	1	967.013	1933.02	1932.04	504.57	0.48743	138435	CID (Collision Induced Dissociation)	MS2		22.9	84.5274	30272	R_DC_KO_A.raw	4.8	0	1.066e-05
	High	Sequest HT (A11)	Unambiguous	QsHsVHKLALGTLAFEEALSSGSPIR	S2(Phospho); S4(Phospho)	1	1	326505528	326505528	1	3	0.0845	0	1	1	967.013	2899.02	2895.38	1258.55	1.21466	138435	CID (Collision Induced Dissociation)	MS2		22.9	84.5274	30272	R_DC_KO_A.raw	2.96	0.0001993	0.01098
	High	Sequest HT (A11)	Unambiguous	LALGTLAFEEALSSGSPIR		1	1	326505528	326505528	0	2	0.5632	0	1	1	966.596	1932.19	1932.04	73.24	0.07075	198872	CID (Collision Induced Dissociation)	MS2		13.374	84.8319	30390	R_DC_KO_A.raw	4.67	0	2.444e-06
	High	Sequest HT (A11)	Unambiguous	QADTDAYMYSEEK		1	1	326505528	326505528	0	2	0.2674	0	1	1	776.676	1552.34	1550.63	1104.69	0.85648	180585	CID (Collision Induced Dissociation)	MS2		5.667	26.2447	7451	R_DC_KO_A.raw	2.88	0	0.003707
	High	Sequest HT (A11)	Unambiguous	QADTDAYMYSEEK		1	1	326505528	326505528	0	2	0.2944	0	1	1	775.926	1550.84	1550.63	137.32	0.10647	255952	CID (Collision Induced Dissociation)	MS2		4.824	26.4596	7536	R_DC_KO_A.raw	2.48	0.005945	0.0704
High	Master Protein	326528949	Name:"Similar to RAD23 Probable ubiquitin receptor RAD23 (Oryza sativa subsp. japonica OX=39947)"	0	10.537	14.7619	4	5	4	1	420	43.7	5.11	16.34	4
	Confidence	Identifying Node	PSM Ambiguity	Annotated Sequence	Modifications	# Protein Groups	# Proteins	Master Protein Accessions	Protein Accessions	# Missed Cleavages	Charge	DeltaScore	DeltaCn	Rank	Search Engine Rank	m/z [Da]	MH+ [Da]	Theo. MH+ [Da]	DeltaM [ppm]	Deltam/z [Da]	Intensity	Activation Type	MS Order	Isolation Interference [%]	Ion Inject Time [ms]	RT [min]	First Scan	Spectrum File	XCorr	Percolator q-Value	Percolator PEP
	High	Sequest HT (A11)	Unambiguous	AIDYLYSGIPESVEAPPVAR		1	2	326528949	326501072; 326528949	0	2	0.5407	0	1	1	1073.85	2146.69	2147.1	-192.16	-0.20629	224141	CID (Collision Induced Dissociation)	MS2		12.117	70.9997	25088	R_DC_KO_A.raw	4.42	0	2.594e-05
	High	Sequest HT (A11)	Unambiguous	AAyNNPERAIDyLYSGIPESVEAPPVAR	Y3(Phospho); Y12(Phospho)	1	2	326528949	326501072; 326528949	1	3	0.0868	0	1	1	1073.85	3219.53	3222.45	-907.41	-0.9747	224141	CID (Collision Induced Dissociation)	MS2		12.117	70.9997	25088	R_DC_KO_A.raw	3.11	0.002904	0.0455
	High	Sequest HT (A11)	Unambiguous	IIESAQGQNVYPADQLMIIYQGK		1	2	326528949	326501072; 326528949	0	3	0.0807	0	1	1	860.678	2580.02	2579.32	271.61	0.23353	147266	CID (Collision Induced Dissociation)	MS2		10.828	75.0292	26644	R_DC_KO_A.raw	3.47	0.0001993	0.01263
	High	Sequest HT (A11)	Unambiguous	LIQENQAEFLR		1	2	326528949	326501072; 326528949	0	2	0.1273	0	1	1	681.424	1361.84	1360.72	822.26	0.55944	652230	CID (Collision Induced Dissociation)	MS2		1.191	42.0027	13687	R_DC_KO_A.raw	2.75	0	0.001948
	High	Sequest HT (A11)	Selected	LIQENQAEFLR		1	2	326528949	326501072; 326528949	0	2	0.027	0	1	1	680.757	1360.51	1360.72	-157.63	-0.10724	215339	CID (Collision Induced Dissociation)	MS2		1.675	42.0998	13726	R_DC_KO_A.raw	2.59	0.001076	0.02789
High	Master Protein	326515182	Name:"Similar to BIOF 8-amino-7-oxononanoate synthase (Arabidopsis thaliana OX=3702)"	0.007	1.414	6.75381	1	1	1	1	459	49.7	7.52	4.03	1
	Confidence	Identifying Node	PSM Ambiguity	Annotated Sequence	Modifications	# Protein Groups	# Proteins	Master Protein Accessions	Protein Accessions	# Missed Cleavages	Charge	DeltaScore	DeltaCn	Rank	Search Engine Rank	m/z [Da]	MH+ [Da]	Theo. MH+ [Da]	DeltaM [ppm]	Deltam/z [Da]	Intensity	Activation Type	MS Order	Isolation Interference [%]	Ion Inject Time [ms]	RT [min]	First Scan	Spectrum File	XCorr	Percolator q-Value	Percolator PEP
	High	Sequest HT (A11)	Unambiguous	EDcLLCPTGFSANMAVmTALGSIssLLAVGR	C3(Carbamidomethyl); M17(Oxidation); S24(Phospho); S25(Phospho)	1	1	326515182	326515182	0	3	0.0645	0	1	1	1119.93	3357.78	3360.48	-802.11	-0.89849	116274	CID (Collision Induced Dissociation)	MS2		8.484	87.7324	31492	R_DC_KO_A.raw	4.03	0.002501	0.03854
High	Master Protein	326522288	Name:"Similar to CYP94A1 Cytochrome P450 94A1 (Vicia sativa OX=3908)"	0.003	1.628	1.7301	1	1	1	1	578	64.8	9.06	2.34	1
	Confidence	Identifying Node	PSM Ambiguity	Annotated Sequence	Modifications	# Protein Groups	# Proteins	Master Protein Accessions	Protein Accessions	# Missed Cleavages	Charge	DeltaScore	DeltaCn	Rank	Search Engine Rank	m/z [Da]	MH+ [Da]	Theo. MH+ [Da]	DeltaM [ppm]	Deltam/z [Da]	Intensity	Activation Type	MS Order	Isolation Interference [%]	Ion Inject Time [ms]	RT [min]	First Scan	Spectrum File	XCorr	Percolator q-Value	Percolator PEP
	High	Sequest HT (A11)	Unambiguous	tVDLQDALER	T1(Phospho)	1	2	326522288	326522288; 326487950	0	2	0.1538	0	1	1	621.34	1241.67	1239.56	1702.33	1.05507	571479	CID (Collision Induced Dissociation)	MS2		3.357	38.0982	12136	R_DC_KO_A.raw	2.34	0.0009222	0.02353

## Sheet: ROOT KO_replicate 2
Phosphopeptides detected in the proteome of untreated HvMPK3 KO roots - replicate 2.
Protein FDR Confidence	Master	Accession	Description	Exp. q-value	Sum PEP Score	Coverage	# Peptides	# PSMs	# Unique Peptides	# Protein Groups	# AAs	MW [kDa]	calc. pI	Score Sequest HT	# Peptides Sequest HT
High	Master Protein	326496021	Name:"Similar to DHAR1 Probable glutathione S-transferase DHAR1, cytosolic (Oryza sativa subsp. japonica OX=39947)"	0	43.138	57.5472	10	28	10	1	212	23.3	6.06	86.25	10
	Confidence	Identifying Node	PSM Ambiguity	Annotated Sequence	Modifications	# Protein Groups	# Proteins	Master Protein Accessions	Protein Accessions	# Missed Cleavages	Charge	DeltaScore	DeltaCn	Rank	Search Engine Rank	m/z [Da]	MH+ [Da]	Theo. MH+ [Da]	DeltaM [ppm]	Deltam/z [Da]	Intensity	Activation Type	MS Order	Isolation Interference [%]	Ion Inject Time [ms]	RT [min]	First Scan	Spectrum File	XCorr	Percolator q-Value	Percolator PEP
	High	Sequest HT (A11)	Unambiguous	VPVFNGGDGK		1	1	326496021	326496021	0	2	0.1193	0	1	1	495.254	989.5	989.505	-4.85	-0.0024	1.16528e+06	CID (Collision Induced Dissociation)	MS2		0.826	22.8134	5996	R_DC_KO_B.raw	1.76	0	0.004948
	High	Sequest HT (A11)	Unambiguous	VPETLTSVHAYTEALFSR		1	1	326496021	326496021	0	2	0.2994	0	1	1	1012.1	2023.19	2021.03	1065.35	1.07655	117377	CID (Collision Induced Dissociation)	MS2		14.898	67.9202	23775	R_DC_KO_B.raw	3.34	0	0.0003972
	High	Sequest HT (A11)	Unambiguous	VPETLTSVHAYTEALFSR		1	1	326496021	326496021	0	2	0.5744	0	1	1	1011.35	2021.69	2021.03	323.14	0.32654	119122	CID (Collision Induced Dissociation)	MS2		12.216	68.0856	23839	R_DC_KO_B.raw	4.84	0	1.486e-05
	High	Sequest HT (A11)	Unambiguous	VPETLTSVHAYTEALFSR		1	1	326496021	326496021	0	3	0.1444	0	1	1	675.424	2024.26	2021.03	1594.93	1.07447	490693	CID (Collision Induced Dissociation)	MS2		1.42	68.5384	24016	R_DC_KO_B.raw	2.7	0.004403	0.04918
	High	Sequest HT (A11)	Unambiguous	VPETLTSVHAYTEALFSR		1	1	326496021	326496021	0	3	0.4465	0	1	1	674.757	2022.26	2021.03	605.31	0.40779	1.00688e+06	CID (Collision Induced Dissociation)	MS2		1.169	68.5807	24032	R_DC_KO_B.raw	3.83	0	0.0005699
	High	Sequest HT (A11)	Unambiguous	VPETLTSVHAYTEALFSR		1	1	326496021	326496021	0	2	0.4315	0	1	1	1010.01	2019.02	2021.03	-996.34	-1.00682	317640	CID (Collision Induced Dissociation)	MS2		12.361	68.8048	24120	R_DC_KO_B.raw	2.92	0	0.0001889
	High	Sequest HT (A11)	Unambiguous	VPETLTSVHAYTEALFSR		1	1	326496021	326496021	0	3	0.4419	0	1	1	674.424	2021.26	2021.03	110.51	0.07445	497897	CID (Collision Induced Dissociation)	MS2		2.078	68.9519	24177	R_DC_KO_B.raw	3.1	0	0.001593
	High	Sequest HT (A11)	Unambiguous	WIADSDVITQVIEEK		1	1	326496021	326496021	0	2	0.4883	0	1	1	874.094	1747.18	1745.9	736.58	0.643	158018	CID (Collision Induced Dissociation)	MS2		13.154	76.5269	27094	R_DC_KO_B.raw	5.57	0	2.566e-06
	High	Sequest HT (A11)	Unambiguous	WIADSDVITQVIEEK		1	1	326496021	326496021	0	3	0.3031	0	1	1	582.589	1745.75	1745.9	-82.34	-0.04792	89306.4	CID (Collision Induced Dissociation)	MS2		8.229	77.2632	27376	R_DC_KO_B.raw	3.53	0.0007799	0.01586
	High	Sequest HT (A11)	Unambiguous	WIADSDVITQVIEEK		1	1	326496021	326496021	0	2	0.501	0	1	1	873.428	1745.85	1745.9	-27.13	-0.02368	205811	CID (Collision Induced Dissociation)	MS2		4.115	77.3256	27399	R_DC_KO_B.raw	4.99	0	1.677e-06
	High	Sequest HT (A11)	Unambiguous	WIADSDVITQVIEEK		1	1	326496021	326496021	0	2	0.4052	0	1	1	872.928	1744.85	1745.9	-599.91	-0.52369	106020	CID (Collision Induced Dissociation)	MS2		4.513	77.3877	27423	R_DC_KO_B.raw	3.06	0	1.557e-05
	High	Sequest HT (A11)	Unambiguous	IFSTFVTFLK		1	1	326496021	326496021	0	2	0.4671	0	1	1	601.839	1202.67	1202.68	-9.07	-0.00545	573021	CID (Collision Induced Dissociation)	MS2		2.162	77.5116	27470	R_DC_KO_B.raw	3.04	0.0006166	0.01317
	High	Sequest HT (A11)	Unambiguous	IFSTFVTFLK		1	1	326496021	326496021	0	2	0.2565	0	1	1	600.922	1200.84	1202.68	-1533.47	-0.92214	154171	CID (Collision Induced Dissociation)	MS2		2.453	78.2698	27760	R_DC_KO_B.raw	1.91	0.002237	0.0287
	High	Sequest HT (A11)	Unambiguous	ALVDELQALEEHLK		1	1	326496021	326496021	0	2	0.2468	0	1	1	805.926	1610.85	1607.86	1854.46	1.49086	102604	CID (Collision Induced Dissociation)	MS2		9.621	78.4811	27842	R_DC_KO_B.raw	3.12	0	0.001804
	High	Sequest HT (A11)	Unambiguous	ALVDELQALEEHLK		1	1	326496021	326496021	0	3	0.0743	0	1	1	536.671	1608	1607.86	84.13	0.04509	262980	CID (Collision Induced Dissociation)	MS2		3.004	78.4983	27848	R_DC_KO_B.raw	1.75	0.000213	0.0106
	High	Sequest HT (A11)	Unambiguous	ALVDELQALEEHLK		1	1	326496021	326496021	0	3	0.0615	0	1	1	536.255	1606.75	1607.86	-693.32	-0.37159	629308	CID (Collision Induced Dissociation)	MS2		1.57	78.986	28036	R_DC_KO_B.raw	1.95	0.00914	0.1041
	High	Sequest HT (A11)	Unambiguous	ALVDELQALEEHLK		1	1	326496021	326496021	0	2	0.3781	0	1	1	804.426	1607.85	1607.86	-11.41	-0.00917	172265	CID (Collision Induced Dissociation)	MS2		8.317	79.4473	28212	R_DC_KO_B.raw	3.2	0	0.0001701
	High	Sequest HT (A11)	Selected	ALVDELQALEEHLK		1	1	326496021	326496021	0	2	0.0321	0	1	1	803.843	1606.68	1607.86	-737.02	-0.59252	184808	CID (Collision Induced Dissociation)	MS2		5.775	79.6878	28304	R_DC_KO_B.raw	1.87	0.002237	0.03356
	High	Sequest HT (A11)	Unambiguous	WIADSDVITQVIEEKYPTPSLVTPPEYASVGSK		1	1	326496021	326496021	1	3	0.2255	0	1	1	1208.68	3624.04	3619.84	1159.27	1.3988	58419.6	CID (Collision Induced Dissociation)	MS2		21.501	88.0593	31403	R_DC_KO_B.raw	4.39	0.001809	0.02612
	High	Sequest HT (A11)	Unambiguous	WIADSDVITQVIEEKYPTPSLVTPPEYASVGSK		1	1	326496021	326496021	1	3	0.3573	0	1	1	1207.85	3621.54	3619.84	468.62	0.56545	49513.9	CID (Collision Induced Dissociation)	MS2		45.129	88.2248	31462	R_DC_KO_B.raw	5.01	0	1.275e-05
	High	Sequest HT (A11)	Unambiguous	VLLTLEEK		1	1	326496021	326496021	0	1	0.311	0	1	2	945.012	945.012	944.566	472.39	0.4462	121101	CID (Collision Induced Dissociation)	MS2		13.215	37.9833	11970	R_DC_KO_B.raw	2.54	0	0.00419
	High	Sequest HT (A11)	Unambiguous	VLLTLEEK		1	1	326496021	326496021	0	2	0.1721	0	1	2	472.837	944.666	944.566	105.66	0.0499	648929	CID (Collision Induced Dissociation)	MS2		0.782	38.8227	12298	R_DC_KO_B.raw	2.44	0.001809	0.02573
	High	Sequest HT (A11)	Unambiguous	AHGPYINGANVSAADLSLAPK		1	1	326496021	326496021	0	3	0.0763	0	1	1	689.841	2067.51	2066.07	697.72	0.48051	610312	CID (Collision Induced Dissociation)	MS2		2.074	50.1432	16778	R_DC_KO_B.raw	2.49	0.000213	0.01201
	High	Sequest HT (A11)	Unambiguous	YPTPSLVTPPEYASVGSK		1	1	326496021	326496021	0	2	0.3812	0	1	1	947.263	1893.52	1892.96	292.53	0.27687	208113	CID (Collision Induced Dissociation)	MS2		8.828	56.596	19324	R_DC_KO_B.raw	3.83	0	6.765e-06
	High	Sequest HT (A11)	Unambiguous	YPTPSLVTPPEYASVGSK		1	1	326496021	326496021	0	2	0.4028	0	1	1	946.429	1891.85	1892.96	-587.94	-0.55648	215303	CID (Collision Induced Dissociation)	MS2		9.333	56.9305	19456	R_DC_KO_B.raw	2.83	0	1.005e-05
	High	Sequest HT (A11)	Unambiguous	YPTPSLVTPPEYASVGSK		1	1	326496021	326496021	0	2	0.2412	0	1	1	948.346	1895.68	1892.96	1437.14	1.36022	157891	CID (Collision Induced Dissociation)	MS2		8.43	58.0093	19886	R_DC_KO_B.raw	3.4	0.000213	0.007841
	High	Sequest HT (A11)	Unambiguous	YPTPSLVTPPEYASVGSK		1	1	326496021	326496021	0	2	0.3772	0	1	1	947.429	1893.85	1892.96	468.62	0.44354	179681	CID (Collision Induced Dissociation)	MS2		5.47	58.326	20011	R_DC_KO_B.raw	3.34	0	8.616e-06
	High	Sequest HT (A11)	Unambiguous	DASDGsEKALVDELQALEEHLK	S6(Phospho)	1	1	326496021	326496021	1	3	0.0938	0	1	1	826.594	2477.77	2477.14	250.97	0.20723	42397.7	CID (Collision Induced Dissociation)	MS2		36.813	95.2049	33921	R_DC_KO_B.raw	3.2	0.001669	0.02464
High	Master Protein	326494024	Name:"Similar to ACT1 Actin-1 (Oryza sativa subsp. japonica OX=39947)"	0	30.695	40.3183	9	20	3	1	377	41.8	5.49	64.61	9
	Confidence	Identifying Node	PSM Ambiguity	Annotated Sequence	Modifications	# Protein Groups	# Proteins	Master Protein Accessions	Protein Accessions	# Missed Cleavages	Charge	DeltaScore	DeltaCn	Rank	Search Engine Rank	m/z [Da]	MH+ [Da]	Theo. MH+ [Da]	DeltaM [ppm]	Deltam/z [Da]	Intensity	Activation Type	MS Order	Isolation Interference [%]	Ion Inject Time [ms]	RT [min]	First Scan	Spectrum File	XCorr	Percolator q-Value	Percolator PEP
	High	Sequest HT (A11)	Unambiguous	SYELPDGQVITIGSER		1	1	326494024	326494024	0	2	0.3919	0	1	1	881.678	1762.35	1763.88	-868.8	-0.76623	168803	CID (Collision Induced Dissociation)	MS2		2.072	63.6235	22092	R_DC_KO_B.raw	2.96	0	0.001047
	High	Sequest HT (A11)	Unambiguous	TssSVEKSYELPDGQVITIGSER	S2(Phospho); S3(Phospho)	1	1	326494024	326494024	1	3	0.0739	0	1	1	881.678	2643.02	2642.16	323.9	0.28526	168803	CID (Collision Induced Dissociation)	MS2		2.072	63.6235	22092	R_DC_KO_B.raw	2.57	0.001326	0.02212
	High	Sequest HT (A11)	Unambiguous	SYELPDGQVITIGSER		1	1	326494024	326494024	0	2	0.068	0	1	1	883.511	1766.02	1763.88	1209.99	1.06714	125319	CID (Collision Induced Dissociation)	MS2		14.77	64.6189	22482	R_DC_KO_B.raw	2.5	0.004044	0.04354
	High	Sequest HT (A11)	Unambiguous	TTGIVLDSGDGVSHTVPIYEGYALPHAILR		3	6	326516786; 326516064; 326494024	326501816; 326516786; 326516064; 326494024; 326490788; 326495636	0	3	0.2423	0	1	1	1051.51	3152.53	3151.64	281.38	0.2956	464508	CID (Collision Induced Dissociation)	MS2		3.755	72.1987	25436	R_DC_KO_B.raw	3.88	0.000213	0.006625
	High	Sequest HT (A11)	Unambiguous	cPEVLFQPSFIGMEAAGIHETTYNSIMK	C1(Carbamidomethyl)	2	3	326516786; 326494024	326501816; 326516786; 326494024	0	3	0.1118	0	1	1	1058.01	3172.03	3170.5	482.54	0.50996	47245.6	CID (Collision Induced Dissociation)	MS2		26.115	82.3161	29296	R_DC_KO_B.raw	3.4	0.000213	0.01158
	High	Sequest HT (A11)	Unambiguous	SYELPDGQVITIGSER		1	1	326494024	326494024	0	2	0.4163	0	1	1	882.511	1764.02	1763.88	76.1	0.06712	330175	CID (Collision Induced Dissociation)	MS2		3.026	63.1549	21910	R_DC_KO_B.raw	4.06	0	0.000598
	High	Sequest HT (A11)	Unambiguous	LSYIALDYDQEMETSK		1	2	326494024	326501816; 326494024	0	2	0.4336	0	1	1	953.596	1906.18	1905.88	160.58	0.15302	122403	CID (Collision Induced Dissociation)	MS2		10.184	61.763	21365	R_DC_KO_B.raw	4.59	0	5.261e-05
	High	Sequest HT (A11)	Unambiguous	LSYIALDYDQEMETSK		1	2	326494024	326501816; 326494024	0	2	0.4126	0	1	1	953.929	1906.85	1905.88	510.38	0.48636	156069	CID (Collision Induced Dissociation)	MS2		4.875	60.2048	20754	R_DC_KO_B.raw	3.49	0	4.921e-05
	High	Sequest HT (A11)	Unambiguous	GYSFTTTAER		2	11	326516786; 326494024	326501816; 326516786; 326488133; 326530362; 326494024; 326490788; 326495636; 326524317; 326502758; 326529133; 326521830	0	2	0.4097	0	1	1	567.255	1133.5	1132.53	861.91	0.48807	950957	CID (Collision Induced Dissociation)	MS2		0.835	26.4195	7402	R_DC_KO_B.raw	2.88	0	0.003006
	High	Sequest HT (A11)	Unambiguous	EITALAPSSMK		4	6	326516786; 326516064; 326494024; 1540331568	326501816; 326516786; 326516064; 326494024; 326495636; 1540331568	0	1	0.3789	0	1	1	1147.43	1147.43	1147.6	-147.86	-0.16968	294959	CID (Collision Induced Dissociation)	MS2		9.07	35.0584	10816	R_DC_KO_B.raw	2.85	0.000213	0.008639
	High	Sequest HT (A11)	Unambiguous	VAPEEHPVLLTEAPLNPK		3	9	326516786; 326516064; 326494024	326501816; 326516786; 326516064; 326530362; 326494024; 326495636; 326524317; 326529133; 326521830	0	2	0.1811	0	1	1	978.096	1955.19	1954.06	573.79	0.56061	115058	CID (Collision Induced Dissociation)	MS2		10.132	46.7723	15440	R_DC_KO_B.raw	2.54	0.0007799	0.01748
	High	Sequest HT (A11)	Unambiguous	VAPEEHPVLLTEAPLNPK		3	9	326516786; 326516064; 326494024	326501816; 326516786; 326516064; 326530362; 326494024; 326495636; 326524317; 326529133; 326521830	0	3	0.0877	0	1	1	652.84	1956.51	1954.06	1249.46	0.81384	808599	CID (Collision Induced Dissociation)	MS2		0.92	47.1547	15591	R_DC_KO_B.raw	2.85	0.005125	0.06218
	High	Sequest HT (A11)	Unambiguous	VAPEEHPVLLTEAPLNPK		3	9	326516786; 326516064; 326494024	326501816; 326516786; 326516064; 326530362; 326494024; 326495636; 326524317; 326529133; 326521830	0	2	0.1494	0	1	1	977.43	1953.85	1954.06	-108.56	-0.10607	304051	CID (Collision Induced Dissociation)	MS2		9.677	47.3969	15689	R_DC_KO_B.raw	3.48	0.000213	0.006563
	High	Sequest HT (A11)	Unambiguous	VAPEEHPVLLTEAPLNPK		3	9	326516786; 326516064; 326494024	326501816; 326516786; 326516064; 326530362; 326494024; 326495636; 326524317; 326529133; 326521830	0	3	0.2615	0	1	1	652.257	1954.76	1954.06	353.87	0.23049	1.79953e+06	CID (Collision Induced Dissociation)	MS2		0.556	47.5583	15752	R_DC_KO_B.raw	3.25	0.002237	0.02908
	High	Sequest HT (A11)	Unambiguous	VAPEEHPVLLTEAPLNPK		3	9	326516786; 326516064; 326494024	326501816; 326516786; 326516064; 326530362; 326494024; 326495636; 326524317; 326529133; 326521830	0	3	0.3161	0	1	1	652.007	1954.01	1954.06	-29.95	-0.01951	955089	CID (Collision Induced Dissociation)	MS2		0.895	47.7862	15843	R_DC_KO_B.raw	3.1	0.004799	0.05613
	High	Sequest HT (A11)	Unambiguous	YPIEHGIVSNWDDMEK		3	5	326516786; 326516064; 326494024	326501816; 326516786; 326516064; 326494024; 326495636	0	2	0.1667	0	1	1	966.763	1932.52	1932.88	-186.83	-0.18056	205350	CID (Collision Induced Dissociation)	MS2		15.888	52.0991	17550	R_DC_KO_B.raw	2.82	0.000213	0.007299
	High	Sequest HT (A11)	Unambiguous	YPIEHGIVSNWDDMEK		3	5	326516786; 326516064; 326494024	326501816; 326516786; 326516064; 326494024; 326495636	0	3	0.0664	0	1	1	645.923	1935.76	1932.88	1487.87	0.95863	240335	CID (Collision Induced Dissociation)	MS2		2.58	52.2521	17610	R_DC_KO_B.raw	2.86	0.000213	0.006813
	High	Sequest HT (A11)	Unambiguous	YPIEHGIVSNWDDMEK		3	5	326516786; 326516064; 326494024	326501816; 326516786; 326516064; 326494024; 326495636	0	3	0.131	0	1	1	645.257	1933.76	1932.88	453.13	0.29195	262840	CID (Collision Induced Dissociation)	MS2		4.83	53.1091	17951	R_DC_KO_B.raw	3.97	0	0.0004075
	High	Sequest HT (A11)	Unambiguous	LSYIALDYDQEmETSK	M12(Oxidation)	1	2	326494024	326501816; 326494024	0	2	0.2163	0	1	1	961.429	1921.85	1921.87	-11.4	-0.01095	167907	CID (Collision Induced Dissociation)	MS2		6.338	53.3237	18036	R_DC_KO_B.raw	3.19	0	0.0002742
	High	Sequest HT (A11)	Unambiguous	LSYIALDYDQEMETSK		1	2	326494024	326501816; 326494024	0	2	0.3881	0	1	1	953.263	1905.52	1905.88	-189.23	-0.18032	173987	CID (Collision Induced Dissociation)	MS2		6.524	60.244	20769	R_DC_KO_B.raw	3.35	0	0.0001533
High	Master Protein	545693624	Name:"Similar to At4g02110 BRCT domain-containing protein At4g02110 (Arabidopsis thaliana OX=3702)"	0	3.349	15.3333	2	3	1	1	150	17.2	8.47	5.05	2
	Confidence	Identifying Node	PSM Ambiguity	Annotated Sequence	Modifications	# Protein Groups	# Proteins	Master Protein Accessions	Protein Accessions	# Missed Cleavages	Charge	DeltaScore	DeltaCn	Rank	Search Engine Rank	m/z [Da]	MH+ [Da]	Theo. MH+ [Da]	DeltaM [ppm]	Deltam/z [Da]	Intensity	Activation Type	MS Order	Isolation Interference [%]	Ion Inject Time [ms]	RT [min]	First Scan	Spectrum File	XCorr	Percolator q-Value	Percolator PEP
	High	Sequest HT (A11)	Unambiguous	LISEAGASyVGAMSR	Y9(Phospho)	1	2	545693624	545693624; 326525945	0	2	0.0032	0	1	1	797.343	1593.68	1591.72	1231.4	0.98002	206592	CID (Collision Induced Dissociation)	MS2		8.688	52.5431	17727	R_DC_KO_B.raw	3.13	0.0006166	0.01369
	High	Sequest HT (A11)	Unambiguous	LISEAGAsYVGAMSR	S8(Phospho)	1	2	545693624	545693624; 326525945	0	2		0.0032	2	2	797.343	1593.68	1591.72	1231.4	0.98002	206592	CID (Collision Induced Dissociation)	MS2		8.688	52.5431	17727	R_DC_KO_B.raw	3.12	0.004403	0.04905
	High	Sequest HT (A11)	Selected	LFIGMLPK		2	3	545693624; 326528321	545693624; 326489549; 326528321	0	2	0.0156	0	1	1	459.836	918.666	918.548	127.87	0.05873	409472	CID (Collision Induced Dissociation)	MS2		2.006	59.2603	20381	R_DC_KO_B.raw	1.92	0.002237	0.03267

## Sheet: ROOT KO_replicate 3
Phosphopeptides detected in the proteome of untreated HvMPK3 KO roots - replicate 3.
Protein FDR Confidence	Master	Accession	Description	Exp. q-value	Sum PEP Score	Coverage	# Peptides	# PSMs	# Unique Peptides	# Protein Groups	# AAs	MW [kDa]	calc. pI	Score Sequest HT	# Peptides Sequest HT
High	Master Protein	257286412	Name:"Similar to APX2 L-ascorbate peroxidase 2, cytosolic (Oryza sativa subsp. japonica OX=39947)"	0	35.47	58.2031	11	23	10	1	256	27.6	5.25	71.74	11
	Confidence	Identifying Node	PSM Ambiguity	Annotated Sequence	Modifications	# Protein Groups	# Proteins	Master Protein Accessions	Protein Accessions	# Missed Cleavages	Charge	DeltaScore	DeltaCn	Rank	Search Engine Rank	m/z [Da]	MH+ [Da]	Theo. MH+ [Da]	DeltaM [ppm]	Deltam/z [Da]	Intensity	Activation Type	MS Order	Isolation Interference [%]	Ion Inject Time [ms]	RT [min]	First Scan	Spectrum File	XCorr	Percolator q-Value	Percolator PEP
	High	Sequest HT (A11)	Unambiguous	cYPTVSDEYLAAVAK	C1(Carbamidomethyl)	1	1	257286412	257286412	0	2	0.3028	0	1	1	844.427	1687.85	1686.8	618.19	0.52138	241100	CID (Collision Induced Dissociation)	MS2		8.095	64.6919	22252	R_DC_KO_C.raw	2.51	0.001747	0.02373
	High	Sequest HT (A11)	Unambiguous	cYPTVSDEYLAAVAK	C1(Carbamidomethyl)	1	1	257286412	257286412	0	2	0.2632	0	1	1	844.927	1688.85	1686.8	1211.04	1.02139	158372	CID (Collision Induced Dissociation)	MS2		5.63	64.355	22124	R_DC_KO_C.raw	2.47	0.00243	0.03118
	High	Sequest HT (A11)	Unambiguous	YAADEDAFFADYAEAHLK		1	1	257286412	257286412	0	2	0.4355	0	1	1	1024.43	2047.85	2046.91	462.22	0.47306	96649.4	CID (Collision Induced Dissociation)	MS2		10.316	65.3755	22513	R_DC_KO_C.raw	3.72	0.0002752	0.004928
	High	Sequest HT (A11)	Unambiguous	cYPTVSDEYLAAVAK	C1(Carbamidomethyl)	1	1	257286412	257286412	0	2	0.372	0	1	1	842.927	1684.85	1686.8	-1160.35	-0.97865	92185.9	CID (Collision Induced Dissociation)	MS2		12.996	58.897	20029	R_DC_KO_C.raw	2.5	0	0.001186
	High	Sequest HT (A11)	Unambiguous	YAADEDAFFADYAEAHLK		1	1	257286412	257286412	0	3	0.471	0	1	1	683.341	2048.01	2046.91	537.26	0.36658	509586	CID (Collision Induced Dissociation)	MS2		1.711	66.347	22880	R_DC_KO_C.raw	4.31	0	2.374e-05
	High	Sequest HT (A11)	Unambiguous	YAADEDAFFADYAEAHLK		1	1	257286412	257286412	0	2	0.4237	0	1	1	1024.01	2047.02	2046.91	55.09	0.05638	122587	CID (Collision Induced Dissociation)	MS2		8.294	65.7776	22666	R_DC_KO_C.raw	2.95	0	0.0003478
	High	Sequest HT (A11)	Unambiguous	YAADEDAFFADYAEAHLK		1	1	257286412	257286412	0	3	0.536	0	1	1	683.007	2047.01	2046.91	48.71	0.03324	593586	CID (Collision Induced Dissociation)	MS2		1.855	66.3492	22881	R_DC_KO_C.raw	4.44	0	1.541e-05
	High	Sequest HT (A11)	Unambiguous	QVFSTQMGLSDQDIVALSGGHTLGR		1	1	257286412	257286412	0	3	0.1873	0	1	1	873.261	2617.77	2617.3	177.6	0.15495	134358	CID (Collision Induced Dissociation)	MS2		9.701	69.9936	24271	R_DC_KO_C.raw	2.83	0.001456	0.01916
	High	Sequest HT (A11)	Unambiguous	cYPTVSDEYLAAVAK	C1(Carbamidomethyl)	1	1	257286412	257286412	0	2	0.4179	0	1	1	843.844	1686.68	1686.8	-73.47	-0.06196	543609	CID (Collision Induced Dissociation)	MS2		1.673	58.2703	19786	R_DC_KO_C.raw	2.68	0	0.0002807
	High	Sequest HT (A11)	Unambiguous	VLLTDPAFRPLVDK		1	1	257286412	257286412	0	2	0.3948	0	1	1	792.426	1583.85	1583.92	-44.48	-0.03522	230177	CID (Collision Induced Dissociation)	MS2		5.726	57.2415	19389	R_DC_KO_C.raw	3.85	0	0.001802
	High	Sequest HT (A11)	Unambiguous	TGGPFGTMK		2	3	257643568; 257286412	257643568; 2274984; 257286412	0	2	0.3125	0	1	1	448.253	895.498	895.434	71.75	0.03212	1.05047e+06	CID (Collision Induced Dissociation)	MS2		0.748	25.5916	7077	R_DC_KO_C.raw	2.24	0.001618	0.02193
	High	Sequest HT (A11)	Unambiguous	TGGPFGTMK		2	3	257643568; 257286412	257643568; 2274984; 257286412	0	2	0.2157	0	1	1	448.253	895.498	895.434	71.75	0.03212	546151	CID (Collision Induced Dissociation)	MS2		2.679	24.1954	6537	R_DC_KO_C.raw	2.04	0.001747	0.02641
	High	Sequest HT (A11)	Selected	LPDATQGSDHLR		1	1	257286412	257286412	0	2		0.0283	2	2	655.34	1309.67	1309.65	18.04	0.01182	107476	CID (Collision Induced Dissociation)	MS2		14.379	18.5823	4408	R_DC_KO_C.raw	3.43	0.000696	0.0109
	High	Sequest HT (A11)	Selected	LPDATQGSDHLR		1	1	257286412	257286412	0	2		0.0071	2	2	656.674	1312.34	1309.65	2054.25	1.34518	69776.5	CID (Collision Induced Dissociation)	MS2		7.712	18.0659	4219	R_DC_KO_C.raw	2.78	0.005028	0.06399
	High	Sequest HT (A11)	Selected	LPDATQGSDHLR		1	1	257286412	257286412	0	3		0.0491	2	2	437.586	1310.74	1309.65	835.28	0.36464	305030	CID (Collision Induced Dissociation)	MS2		2.753	17.4648	3998	R_DC_KO_C.raw	3.1	0.000696	0.008762
	High	Sequest HT (A11)	Unambiguous	LSELGFGEASEGcc	C13(Carbamidomethyl); C14(Carbamidomethyl)	1	1	257286412	257286412	0	2	0.4638	0	1	1	758.259	1515.51	1515.61	-65.04	-0.04929	263080	CID (Collision Induced Dissociation)	MS2		4.047	56.5974	19140	R_DC_KO_C.raw	3.73	0	0.0002491
	High	Sequest HT (A11)	Unambiguous	LSELGFGEASEGcc	C13(Carbamidomethyl); C14(Carbamidomethyl)	1	1	257286412	257286412	0	2	0.3712	0	1	1	758.842	1516.68	1515.61	704.75	0.53406	299501	CID (Collision Induced Dissociation)	MS2		2.77	55.7984	18831	R_DC_KO_C.raw	4.31	0	0.0004418
	High	Sequest HT (A11)	Unambiguous	EGLLQLPTDK		1	1	257286412	257286412	0	2	0.4431	0	1	1	557.338	1113.67	1113.62	48.79	0.02716	1.01761e+06	CID (Collision Induced Dissociation)	MS2		0.81	49.8242	16508	R_DC_KO_C.raw	3.43	0.001747	0.02452
	High	Sequest HT (A11)	Unambiguous	cPAELAHGANAGLDIAVR	C1(Carbamidomethyl)	1	1	257286412	257286412	0	3	0.1946	0	1	1	612.839	1836.5	1834.92	861.48	0.52692	127827	CID (Collision Induced Dissociation)	MS2		9.323	43.2378	13957	R_DC_KO_C.raw	2.98	0	0.001975
	High	Sequest HT (A11)	Selected	cPAELAHGANAGLDIAVR	C1(Carbamidomethyl)	1	1	257286412	257286412	0	2	0.0484	0	1	1	917.762	1834.52	1834.92	-221.38	-0.20311	193352	CID (Collision Induced Dissociation)	MS2		10.726	42.5012	13672	R_DC_KO_C.raw	2.48	0	0.003053
	High	Sequest HT (A11)	Unambiguous	tGGPFGTmKCPAELAHGANAGLDIAVR	T1(Phospho); M8(Oxidation)	1	1	257286412	257286412	1	3	0.1384	0	1	1	918.845	2754.52	2750.28	1542.52	1.41412	112143	CID (Collision Induced Dissociation)	MS2		10.426	42.3761	13624	R_DC_KO_C.raw	3.18	0.00414	0.05559
	High	Sequest HT (A11)	Unambiguous	cPAELAHGANAGLDIAVR	C1(Carbamidomethyl)	1	1	257286412	257286412	0	2	0.3207	0	1	1	918.845	1836.68	1834.92	959.43	0.88024	112143	CID (Collision Induced Dissociation)	MS2		10.426	42.3761	13624	R_DC_KO_C.raw	2.9	0	0.0006541
	High	Sequest HT (A11)	Unambiguous	LAWHSAGTFDVATK		1	1	257286412	257286412	0	2	0.2803	0	1	1	752.425	1503.84	1503.76	56.2	0.04225	106282	CID (Collision Induced Dissociation)	MS2		18.004	41.0432	13101	R_DC_KO_C.raw	2.89	0.005561	0.07098
High	Master Protein	326512852	Name:"Similar to gpmA 2,3-bisphosphoglycerate-dependent phosphoglycerate mutase (Protochlamydia amoebophila (strain UWE25) OX=264201)"	0	27.002	9.64912	6	20	6	1	456	50.5	9.95	52.72	6
	Confidence	Identifying Node	PSM Ambiguity	Annotated Sequence	Modifications	# Protein Groups	# Proteins	Master Protein Accessions	Protein Accessions	# Missed Cleavages	Charge	DeltaScore	DeltaCn	Rank	Search Engine Rank	m/z [Da]	MH+ [Da]	Theo. MH+ [Da]	DeltaM [ppm]	Deltam/z [Da]	Intensity	Activation Type	MS Order	Isolation Interference [%]	Ion Inject Time [ms]	RT [min]	First Scan	Spectrum File	XCorr	Percolator q-Value	Percolator PEP
	High	Sequest HT (A11)	Unambiguous	TVTAMDVVYALKR		1	4	326512852	326512852; 326489909; 326503956; 326517276	1	2	0.1289	0	1	1	734.342	1467.68	1466.8	594.92	0.43632	141583	CID (Collision Induced Dissociation)	MS2		5.774	59.2169	20150	R_DC_KO_C.raw	3.49	0	0.003633
	High	Sequest HT (A11)	Unambiguous	TVTAMDVVYALKR		1	4	326512852	326512852; 326489909; 326503956; 326517276	1	2	0.3278	0	1	1	735.342	1469.68	1466.8	1958.46	1.43633	158393	CID (Collision Induced Dissociation)	MS2		7.269	58.9723	20057	R_DC_KO_C.raw	3.02	0.0002752	0.005109
	High	Sequest HT (A11)	Unambiguous	tVTAmDVVYALK	T1(Phospho); M5(Oxidation)	1	4	326512852	326512852; 326489909; 326503956; 326517276	0	2	0.056	0	1	1	703.841	1406.68	1406.66	8.04	0.00566	34539.4	CID (Collision Induced Dissociation)	MS2		50	99.9121	34800	R_DC_KO_C.raw	2.32	0.006837	0.08698
	High	Sequest HT (A11)	Unambiguous	IFLENVIR		1	3	326512852	326512852; 326489909; 326503956	0	2	0.057	0	1	1	502.421	1003.83	1003.59	239.53	0.1202	81128	CID (Collision Induced Dissociation)	MS2		13.216	69.9072	24239	R_DC_KO_C.raw	1.93	0.008903	0.1091
	High	Sequest HT (A11)	Unambiguous	TVTAMDVVYALK		1	4	326512852	326512852; 326489909; 326503956; 326517276	0	2	0.4769	0	1	1	655.924	1310.84	1310.7	104.81	0.06869	2.47004e+06	CID (Collision Induced Dissociation)	MS2		0.569	68.232	23600	R_DC_KO_C.raw	3.25	0	0.001254
	High	Sequest HT (A11)	Unambiguous	TVTAMDVVYALK		1	4	326512852	326512852; 326489909; 326503956; 326517276	0	1	0.1639	0	1	1	1310.85	1310.85	1310.7	114.77	0.15043	118415	CID (Collision Induced Dissociation)	MS2		23.239	67.796	23432	R_DC_KO_C.raw	1.83	0.001747	0.02709
	High	Sequest HT (A11)	Unambiguous	TVTAMDVVYALK		1	4	326512852	326512852; 326489909; 326503956; 326517276	0	2	0.3947	0	1	1	656.84	1312.67	1310.7	1503.58	0.98537	757478	CID (Collision Induced Dissociation)	MS2		1.976	67.5306	23330	R_DC_KO_C.raw	3.42	0	0.003223
	High	Sequest HT (A11)	Unambiguous	TVTAMDVVYALK		1	4	326512852	326512852; 326489909; 326503956; 326517276	0	3	0.1783	0	1	1	437.669	1310.99	1310.7	222.01	0.09699	134489	CID (Collision Induced Dissociation)	MS2		12.365	67.3463	23262	R_DC_KO_C.raw	2.86	0.000696	0.009292
	High	Sequest HT (A11)	Unambiguous	DNIQGITKPAIR		1	3	326512852	326512852; 326489909; 326503956	0	3	0.1393	0	1	1	442.669	1325.99	1325.75	181.14	0.08005	3.88187e+06	CID (Collision Induced Dissociation)	MS2		0.219	27.198	7706	R_DC_KO_C.raw	2.44	0.000696	0.008118
	High	Sequest HT (A11)	Unambiguous	DNIQGITKPAIR		1	3	326512852	326512852; 326489909; 326503956	0	2	0.4089	0	1	1	662.34	1323.67	1325.75	-1569.05	-1.04008	320093	CID (Collision Induced Dissociation)	MS2		2.059	27.122	7676	R_DC_KO_C.raw	2.91	0	0.002236
	High	Sequest HT (A11)	Unambiguous	ISGLIYEETR		1	3	326512852	326512852; 326489909; 326503956	0	1	0.2396	0	1	1	1181.77	1181.77	1180.62	970.87	1.14623	109700	CID (Collision Induced Dissociation)	MS2		22.662	37.758	11825	R_DC_KO_C.raw	3.13	0	0.003347
	High	Sequest HT (A11)	Unambiguous	DNIQGITKPAIR		1	3	326512852	326512852; 326489909; 326503956	0	2	0.4326	0	1	1	663.649	1326.29	1325.75	404.87	0.26838	1.3918e+06	CID (Collision Induced Dissociation)	MS2		0.68	27.0209	7634	R_DC_KO_C.raw	3.19	0.0002752	0.005481
	High	Sequest HT (A11)	Unambiguous	ISGLIYEETR		1	3	326512852	326512852; 326489909; 326503956	0	1	0.316	0	1	1	1180.6	1180.6	1180.62	-17.33	-0.02046	214722	CID (Collision Induced Dissociation)	MS2		11.503	37.8352	11854	R_DC_KO_C.raw	2.69	0.0005112	0.006078
	High	Sequest HT (A11)	Unambiguous	ISGLIYEETR		1	3	326512852	326512852; 326489909; 326503956	0	2	0.409	0	1	1	590.839	1180.67	1180.62	42.19	0.02491	10829739	CID (Collision Induced Dissociation)	MS2		0.134	38.4204	12080	R_DC_KO_C.raw	3.57	0	0.0003133
	High	Sequest HT (A11)	Unambiguous	ISGLIYEETR		1	3	326512852	326512852; 326489909; 326503956	0	2	0.2719	0	1	1	590.256	1179.5	1180.62	-946.01	-0.55844	3.19334e+06	CID (Collision Induced Dissociation)	MS2		0.482	39.0235	12316	R_DC_KO_C.raw	2.28	0	0.001054
	High	Sequest HT (A11)	Selected	KTVTAMDVVYALK		1	4	326512852	326512852; 326489909; 326503956; 326517276	1	2		0.0498	2	2	719.925	1438.84	1438.8	31.2	0.02244	264869	CID (Collision Induced Dissociation)	MS2		4.878	55.5692	18742	R_DC_KO_C.raw	2.29	0.004259	0.05919
	High	Sequest HT (A11)	Unambiguous	KTVTAMDVVYALK		1	4	326512852	326512852; 326489909; 326503956; 326517276	1	3	0.168	0	1	1	479.67	1437	1438.8	-1252.12	-0.60051	70146.2	CID (Collision Induced Dissociation)	MS2		3.589	55.3931	18675	R_DC_KO_C.raw	2.44	0.004103	0.0484
	High	Sequest HT (A11)	Unambiguous	TVTAmDVVYALK	M5(Oxidation)	1	4	326512852	326512852; 326489909; 326503956; 326517276	0	2	0.3672	0	1	1	664.424	1327.84	1326.7	861.38	0.57139	293806	CID (Collision Induced Dissociation)	MS2		2.838	54.2138	18218	R_DC_KO_C.raw	3.35	0.000696	0.008595
	High	Sequest HT (A11)	Unambiguous	TVtAmDVVYALK	T3(Phospho); M5(Oxidation)	1	4	326512852	326512852; 326489909; 326503956; 326517276	0	2	0.056	0	1	2	703.841	1406.68	1406.66	8.04	0.00566	34539.4	CID (Collision Induced Dissociation)	MS2		50	99.9121	34800	R_DC_KO_C.raw	2.32	0.006239	0.07728
	High	Sequest HT (A11)	Unambiguous	IFLENVIR		1	3	326512852	326512852; 326489909; 326503956	0	2	0.1087	0	1	1	502.337	1003.67	1003.59	73.46	0.03686	17693.4	CID (Collision Induced Dissociation)	MS2		40.999	100.745	35074	R_DC_KO_C.raw	2.3	0.001747	0.02398
High	Master Protein	326501816	Name:"Similar to ACT1 Actin-1 (Oryza sativa subsp. japonica OX=39947)"	0	27.28	32.8912	8	19	1	1	377	41.8	5.58	52.56	8
	Confidence	Identifying Node	PSM Ambiguity	Annotated Sequence	Modifications	# Protein Groups	# Proteins	Master Protein Accessions	Protein Accessions	# Missed Cleavages	Charge	DeltaScore	DeltaCn	Rank	Search Engine Rank	m/z [Da]	MH+ [Da]	Theo. MH+ [Da]	DeltaM [ppm]	Deltam/z [Da]	Intensity	Activation Type	MS Order	Isolation Interference [%]	Ion Inject Time [ms]	RT [min]	First Scan	Spectrum File	XCorr	Percolator q-Value	Percolator PEP
	High	Sequest HT (A11)	Unambiguous	TssSVEKSYELPDGQVITIGAER	S2(Phospho); S3(Phospho)	1	1	326501816	326501816	1	3		0.0329	4	4	874.928	2622.77	2626.17	-1294.55	-1.13323	334134	CID (Collision Induced Dissociation)	MS2		4.971	65.1107	22412	R_DC_KO_C.raw	2.94	0.001456	0.01726
	High	Sequest HT (A11)	Unambiguous	TSssVEKSYELPDGQVITIGAER	S3(Phospho); S4(Phospho)	1	1	326501816	326501816	1	3		0.023	3	3	874.928	2622.77	2626.17	-1294.55	-1.13323	334134	CID (Collision Induced Dissociation)	MS2		4.971	65.1107	22412	R_DC_KO_C.raw	2.97	0.001456	0.01675
	High	Sequest HT (A11)	Unambiguous	tSSSVEKsYELPDGQVITIGAER	T1(Phospho); S8(Phospho)	1	1	326501816	326501816	1	3		0.0132	2	2	874.928	2622.77	2626.17	-1294.55	-1.13323	334134	CID (Collision Induced Dissociation)	MS2		4.971	65.1107	22412	R_DC_KO_C.raw	3	0.000696	0.01133
	High	Sequest HT (A11)	Unambiguous	TSSsVEKsYELPDGQVITIGAER	S4(Phospho); S8(Phospho)	1	1	326501816	326501816	1	3	0.0132	0	1	1	874.928	2622.77	2626.17	-1294.55	-1.13323	334134	CID (Collision Induced Dissociation)	MS2		4.971	65.1107	22412	R_DC_KO_C.raw	3.04	0.000696	0.009514
	High	Sequest HT (A11)	Unambiguous	SYELPDGQVITIGAER		3	4	326501816; 326516786; 326516064	326501816; 326516786; 326516064; 326495636	0	2	0.5728	0	1	1	874.928	1748.85	1747.89	550.49	0.4811	334134	CID (Collision Induced Dissociation)	MS2		4.971	65.1107	22412	R_DC_KO_C.raw	5.08	0	4.037e-05
	High	Sequest HT (A11)	Unambiguous	LSYIALDYDQEMETSK		2	2	326501816; 326494024	326501816; 326494024	0	2	0.5269	0	1	1	953.513	1906.02	1905.88	73.12	0.06968	90341.7	CID (Collision Induced Dissociation)	MS2		17.366	61.8369	21159	R_DC_KO_C.raw	4.27	0	4.945e-05
	High	Sequest HT (A11)	Unambiguous	LSYIALDYDQEMETSK		2	2	326501816; 326494024	326501816; 326494024	0	2	0.5463	0	1	1	953.617	1906.23	1905.88	182.58	0.17399	143737	CID (Collision Induced Dissociation)	MS2		7.822	60.3259	20577	R_DC_KO_C.raw	5.4	0	8.983e-06
	High	Sequest HT (A11)	Unambiguous	LSYIALDYDQEMETSK		2	2	326501816; 326494024	326501816; 326494024	0	2	0.0501	0	1	1	954.846	1908.68	1905.88	1472.33	1.40304	78074.9	CID (Collision Induced Dissociation)	MS2		23.665	60.2607	20553	R_DC_KO_C.raw	3.39	0	4.759e-05
	High	Sequest HT (A11)	Unambiguous	SYELPDGQVITIGAER		3	4	326501816; 326516786; 326516064	326501816; 326516786; 326516064; 326495636	0	2	0.1341	0	1	1	874.011	1747.01	1747.89	-498.42	-0.43559	184603	CID (Collision Induced Dissociation)	MS2		14.168	65.5274	22572	R_DC_KO_C.raw	2.76	0	3.394e-05
	High	Sequest HT (A11)	Selected	TTGIVLDSGDGVSHTVPIYEGYALPHAILR		4	6	326501816; 326516786; 326516064; 326494024	326501816; 326516786; 326516064; 326494024; 326490788; 326495636	0	3		0.0366	2	2	1052.51	3155.53	3151.64	1233.28	1.29562	106944	CID (Collision Induced Dissociation)	MS2		10.181	71.9022	24989	R_DC_KO_C.raw	3.16	0.0009131	0.01305
	High	Sequest HT (A11)	Unambiguous	EITALAPSSMK		4	6	326501816; 326516786; 326516064; 326494024	326501816; 326516786; 326516064; 326494024; 326495636; 1540331568	0	2	0.3661	0	1	1	574.339	1147.67	1147.6	58.61	0.03363	2265352	CID (Collision Induced Dissociation)	MS2		0.675	35.0398	10766	R_DC_KO_C.raw	2.54	0.001456	0.01758
	High	Sequest HT (A11)	Rejected	GYSFTTTAER		4	11	326501816; 326516786; 326488133; 326494024	326501816; 326516786; 326488133; 326530362; 326494024; 326490788; 326495636; 326524317; 326502758; 326529133; 326521830	0	2		0.0053	2	2	566.255	1131.5	1132.53	-904.09	-0.51195	1.833e+06	CID (Collision Induced Dissociation)	MS2		0.785	25.5978	7080	R_DC_KO_C.raw	1.89	0.006587	0.08078
	High	Sequest HT (A11)	Unambiguous	GYSFTTTAER		4	11	326501816; 326516786; 326488133; 326494024	326501816; 326516786; 326488133; 326530362; 326494024; 326490788; 326495636; 326524317; 326502758; 326529133; 326521830	0	2	0.3756	0	1	1	567.255	1133.5	1132.53	861.91	0.48807	630562	CID (Collision Induced Dissociation)	MS2		1.069	26.7095	7512	R_DC_KO_C.raw	2.05	0.004024	0.04254
	High	Sequest HT (A11)	Unambiguous	YPIEHGIVSNWDDMEK		4	5	326501816; 326516786; 326516064; 326494024	326501816; 326516786; 326516064; 326494024; 326495636	0	3	0.0862	0	1	1	644.923	1932.76	1932.88	-64.25	-0.04139	325933	CID (Collision Induced Dissociation)	MS2		3.801	52.6048	17594	R_DC_KO_C.raw	2.9	0	0.0008211
	High	Sequest HT (A11)	Unambiguous	YPIEHGIVSNWDDMEK		4	5	326501816; 326516786; 326516064; 326494024	326501816; 326516786; 326516064; 326494024; 326495636	0	2	0.4611	0	1	1	967.346	1933.69	1932.88	416.77	0.40278	108299	CID (Collision Induced Dissociation)	MS2		24.262	52.2894	17472	R_DC_KO_C.raw	3.86	0	0.0009083
	High	Sequest HT (A11)	Unambiguous	YPIEHGIVSNWDDMEK		4	5	326501816; 326516786; 326516064; 326494024	326501816; 326516786; 326516064; 326494024; 326495636	0	3	0.11	0	1	1	645.34	1934.01	1932.88	582.47	0.37528	323361	CID (Collision Induced Dissociation)	MS2		4.447	52.2306	17449	R_DC_KO_C.raw	3.09	0	0.002308
	High	Sequest HT (A11)	Unambiguous	VAPEEHPVLLTEAPLNPK		4	9	326501816; 326516786; 326516064; 326494024	326501816; 326516786; 326516064; 326530362; 326494024; 326495636; 326524317; 326529133; 326521830	0	3	0.1672	0	1	1	652.34	1955.01	1954.06	481.81	0.31383	1.09801e+06	CID (Collision Induced Dissociation)	MS2		1.165	47.5968	15644	R_DC_KO_C.raw	3.41	0.003295	0.03584
	High	Sequest HT (A11)	Unambiguous	VAPEEHPVLLTEAPLNPK		4	9	326501816; 326516786; 326516064; 326494024	326501816; 326516786; 326516064; 326530362; 326494024; 326495636; 326524317; 326529133; 326521830	0	3	0.1336	0	1	1	652.757	1956.26	1954.06	1121.51	0.7305	666474	CID (Collision Induced Dissociation)	MS2		0.873	47.3203	15538	R_DC_KO_C.raw	2.77	0	0.004204
	High	Sequest HT (A11)	Unambiguous	VAPEEHPVLLTEAPLNPK		4	9	326501816; 326516786; 326516064; 326494024	326501816; 326516786; 326516064; 326530362; 326494024; 326495636; 326524317; 326529133; 326521830	0	2	0.1638	0	1	1	977.93	1954.85	1954.06	403.2	0.39394	42841.3	CID (Collision Induced Dissociation)	MS2		22.182	46.7056	15300	R_DC_KO_C.raw	2.93	0.0002752	0.005907
High	Master Protein	326494024	Name:"Similar to ACT1 Actin-1 (Oryza sativa subsp. japonica OX=39947)"	0	27.26	32.8912	8	16	2	1	377	41.8	5.49	52.28	8
	Confidence	Identifying Node	PSM Ambiguity	Annotated Sequence	Modifications	# Protein Groups	# Proteins	Master Protein Accessions	Protein Accessions	# Missed Cleavages	Charge	DeltaScore	DeltaCn	Rank	Search Engine Rank	m/z [Da]	MH+ [Da]	Theo. MH+ [Da]	DeltaM [ppm]	Deltam/z [Da]	Intensity	Activation Type	MS Order	Isolation Interference [%]	Ion Inject Time [ms]	RT [min]	First Scan	Spectrum File	XCorr	Percolator q-Value	Percolator PEP
	High	Sequest HT (A11)	Unambiguous	SYELPDGQVITIGSER		1	1	326494024	326494024	0	2	0.5227	0	1	1	881.428	1761.85	1763.88	-1152.27	-1.01624	122117	CID (Collision Induced Dissociation)	MS2		15.501	63.908	21956	R_DC_KO_C.raw	3.08	0	0.0001624
	High	Sequest HT (A11)	Unambiguous	TssSVEKSYELPDGQVITIGSER	S2(Phospho); S3(Phospho)	1	1	326494024	326494024	1	3	0.0868	0	1	1	882.345	2645.02	2642.16	1080.87	0.95194	376467	CID (Collision Induced Dissociation)	MS2		3.745	63.4613	21784	R_DC_KO_C.raw	3.11	0.0002752	0.00555
	High	Sequest HT (A11)	Unambiguous	LSYIALDYDQEMETSK		2	2	326501816; 326494024	326501816; 326494024	0	2	0.5269	0	1	1	953.513	1906.02	1905.88	73.12	0.06968	90341.7	CID (Collision Induced Dissociation)	MS2		17.366	61.8369	21159	R_DC_KO_C.raw	4.27	0	4.945e-05
	High	Sequest HT (A11)	Unambiguous	LSYIALDYDQEMETSK		2	2	326501816; 326494024	326501816; 326494024	0	2	0.5463	0	1	1	953.617	1906.23	1905.88	182.58	0.17399	143737	CID (Collision Induced Dissociation)	MS2		7.822	60.3259	20577	R_DC_KO_C.raw	5.4	0	8.983e-06
	High	Sequest HT (A11)	Unambiguous	LSYIALDYDQEMETSK		2	2	326501816; 326494024	326501816; 326494024	0	2	0.0501	0	1	1	954.846	1908.68	1905.88	1472.33	1.40304	78074.9	CID (Collision Induced Dissociation)	MS2		23.665	60.2607	20553	R_DC_KO_C.raw	3.39	0	4.759e-05
	High	Sequest HT (A11)	Unambiguous	SYELPDGQVITIGSER		1	1	326494024	326494024	0	2	0.6063	0	1	1	882.345	1763.68	1763.88	-112.88	-0.09955	376467	CID (Collision Induced Dissociation)	MS2		3.745	63.4613	21784	R_DC_KO_C.raw	4.42	0	6.094e-05
	High	Sequest HT (A11)	Selected	TTGIVLDSGDGVSHTVPIYEGYALPHAILR		4	6	326501816; 326516786; 326516064; 326494024	326501816; 326516786; 326516064; 326494024; 326490788; 326495636	0	3		0.0366	2	2	1052.51	3155.53	3151.64	1233.28	1.29562	106944	CID (Collision Induced Dissociation)	MS2		10.181	71.9022	24989	R_DC_KO_C.raw	3.16	0.0009131	0.01305
	High	Sequest HT (A11)	Unambiguous	EITALAPSSMK		4	6	326501816; 326516786; 326516064; 326494024	326501816; 326516786; 326516064; 326494024; 326495636; 1540331568	0	2	0.3661	0	1	1	574.339	1147.67	1147.6	58.61	0.03363	2265352	CID (Collision Induced Dissociation)	MS2		0.675	35.0398	10766	R_DC_KO_C.raw	2.54	0.001456	0.01758
	High	Sequest HT (A11)	Rejected	GYSFTTTAER		4	11	326501816; 326516786; 326488133; 326494024	326501816; 326516786; 326488133; 326530362; 326494024; 326490788; 326495636; 326524317; 326502758; 326529133; 326521830	0	2		0.0053	2	2	566.255	1131.5	1132.53	-904.09	-0.51195	1.833e+06	CID (Collision Induced Dissociation)	MS2		0.785	25.5978	7080	R_DC_KO_C.raw	1.89	0.006587	0.08078
	High	Sequest HT (A11)	Unambiguous	GYSFTTTAER		4	11	326501816; 326516786; 326488133; 326494024	326501816; 326516786; 326488133; 326530362; 326494024; 326490788; 326495636; 326524317; 326502758; 326529133; 326521830	0	2	0.3756	0	1	1	567.255	1133.5	1132.53	861.91	0.48807	630562	CID (Collision Induced Dissociation)	MS2		1.069	26.7095	7512	R_DC_KO_C.raw	2.05	0.004024	0.04254
	High	Sequest HT (A11)	Unambiguous	YPIEHGIVSNWDDMEK		4	5	326501816; 326516786; 326516064; 326494024	326501816; 326516786; 326516064; 326494024; 326495636	0	3	0.0862	0	1	1	644.923	1932.76	1932.88	-64.25	-0.04139	325933	CID (Collision Induced Dissociation)	MS2		3.801	52.6048	17594	R_DC_KO_C.raw	2.9	0	0.0008211
	High	Sequest HT (A11)	Unambiguous	YPIEHGIVSNWDDMEK		4	5	326501816; 326516786; 326516064; 326494024	326501816; 326516786; 326516064; 326494024; 326495636	0	2	0.4611	0	1	1	967.346	1933.69	1932.88	416.77	0.40278	108299	CID (Collision Induced Dissociation)	MS2		24.262	52.2894	17472	R_DC_KO_C.raw	3.86	0	0.0009083
	High	Sequest HT (A11)	Unambiguous	YPIEHGIVSNWDDMEK		4	5	326501816; 326516786; 326516064; 326494024	326501816; 326516786; 326516064; 326494024; 326495636	0	3	0.11	0	1	1	645.34	1934.01	1932.88	582.47	0.37528	323361	CID (Collision Induced Dissociation)	MS2		4.447	52.2306	17449	R_DC_KO_C.raw	3.09	0	0.002308
	High	Sequest HT (A11)	Unambiguous	VAPEEHPVLLTEAPLNPK		4	9	326501816; 326516786; 326516064; 326494024	326501816; 326516786; 326516064; 326530362; 326494024; 326495636; 326524317; 326529133; 326521830	0	3	0.1672	0	1	1	652.34	1955.01	1954.06	481.81	0.31383	1.09801e+06	CID (Collision Induced Dissociation)	MS2		1.165	47.5968	15644	R_DC_KO_C.raw	3.41	0.003295	0.03584
	High	Sequest HT (A11)	Unambiguous	VAPEEHPVLLTEAPLNPK		4	9	326501816; 326516786; 326516064; 326494024	326501816; 326516786; 326516064; 326530362; 326494024; 326495636; 326524317; 326529133; 326521830	0	3	0.1336	0	1	1	652.757	1956.26	1954.06	1121.51	0.7305	666474	CID (Collision Induced Dissociation)	MS2		0.873	47.3203	15538	R_DC_KO_C.raw	2.77	0	0.004204
	High	Sequest HT (A11)	Unambiguous	VAPEEHPVLLTEAPLNPK		4	9	326501816; 326516786; 326516064; 326494024	326501816; 326516786; 326516064; 326530362; 326494024; 326495636; 326524317; 326529133; 326521830	0	2	0.1638	0	1	1	977.93	1954.85	1954.06	403.2	0.39394	42841.3	CID (Collision Induced Dissociation)	MS2		22.182	46.7056	15300	R_DC_KO_C.raw	2.93	0.0002752	0.005907
High	Master Protein	326508482	Name:"Similar to HSP70 Stromal 70 kDa heat shock-related protein, chloroplastic (Pisum sativum OX=3888)"	0	23.459	17.7746	8	11	7	1	692	73.8	5.17	35.97	8
	Confidence	Identifying Node	PSM Ambiguity	Annotated Sequence	Modifications	# Protein Groups	# Proteins	Master Protein Accessions	Protein Accessions	# Missed Cleavages	Charge	DeltaScore	DeltaCn	Rank	Search Engine Rank	m/z [Da]	MH+ [Da]	Theo. MH+ [Da]	DeltaM [ppm]	Deltam/z [Da]	Intensity	Activation Type	MS Order	Isolation Interference [%]	Ion Inject Time [ms]	RT [min]	First Scan	Spectrum File	XCorr	Percolator q-Value	Percolator PEP
	High	Sequest HT (A11)	Unambiguous	IINEPTAASLAYGFEK		1	1	326508482	326508482	0	2	0.4828	0	1	1	862.428	1723.85	1723.89	-24.55	-0.02116	182559	CID (Collision Induced Dissociation)	MS2		9.534	61.1749	20904	R_DC_KO_C.raw	4.37	0	7.245e-06
	High	Sequest HT (A11)	Unambiguous	IINEPTAASLAYGFEK		1	1	326508482	326508482	0	2	0.4028	0	1	1	863.428	1725.85	1723.89	1135.64	0.97886	139483	CID (Collision Induced Dissociation)	MS2		5.179	60.9939	20833	R_DC_KO_C.raw	3.6	0	0.0001353
	High	Sequest HT (A11)	Unambiguous	QFAAEEISAQVLR		1	1	326508482	326508482	0	2	0.1573	0	1	1	731.925	1462.84	1461.77	734.14	0.53657	228630	CID (Collision Induced Dissociation)	MS2		5.786	58.7826	19983	R_DC_KO_C.raw	3.37	0	0.002222
	High	Sequest HT (A11)	Unambiguous	FDIDANGILSVAAVDK		2	3	326508482; 326490563	326508482; 326525763; 326490563	0	2	0.1821	0	1	1	825.51	1650.01	1647.86	1307.29	1.07711	43567.5	CID (Collision Induced Dissociation)	MS2		42.05	78.7832	27555	R_DC_KO_C.raw	2.91	0	0.0002324
	High	Sequest HT (A11)	Unambiguous	LSISNLDEVILVGGSTR		1	1	326508482	326508482	0	2	0.3625	0	1	1	887.095	1773.18	1772.98	116.67	0.10342	76990.1	CID (Collision Induced Dissociation)	MS2		11.314	78.6625	27510	R_DC_KO_C.raw	3.2	0	0.0004098
	High	Sequest HT (A11)	Unambiguous	FDIDANGILSVAAVDK		2	3	326508482; 326490563	326508482; 326525763; 326490563	0	2	0.3988	0	1	1	824.343	1647.68	1647.86	-108.72	-0.08958	81435.9	CID (Collision Induced Dissociation)	MS2		16.267	77.3033	27010	R_DC_KO_C.raw	3.46	0	3.309e-06
	High	Sequest HT (A11)	Unambiguous	FDIDANGILSVAAVDK		2	3	326508482; 326490563	326508482; 326525763; 326490563	0	2	0.4167	0	1	1	825.343	1649.68	1647.86	1105	0.91044	257474	CID (Collision Induced Dissociation)	MS2		15.447	77.2352	26984	R_DC_KO_C.raw	4.2	0	0.000128
	High	Sequest HT (A11)	Unambiguous	IVDWLASTFK		1	1	326508482	326508482	0	2	0.2257	0	1	1	590.089	1179.17	1179.64	-398.62	-0.23511	68911.3	CID (Collision Induced Dissociation)	MS2		11.199	70.1037	24313	R_DC_KO_C.raw	2.26	0.004024	0.04342
	High	Sequest HT (A11)	Selected	DVVLLDVTPLsIGLETLGGVmTK	S11(Phospho); M21(Oxidation)	1	1	326508482	326508482	0	3		0.0209	2	2	823.843	2469.52	2466.28	1311.52	1.07819	64724.8	CID (Collision Induced Dissociation)	MS2		4.864	69.1369	23945	R_DC_KO_C.raw	2.34	0.005982	0.07499
	High	Sequest HT (A11)	Unambiguous	GPNDGDVIDADFTDSN		1	1	326508482	326508482	0	2	0.1192	0	1	1	826.927	1652.85	1651.67	711.17	0.58731	130464	CID (Collision Induced Dissociation)	MS2		9.741	57.2693	19401	R_DC_KO_C.raw	2.6	0.00243	0.02948
	High	Sequest HT (A11)	Unambiguous	NQADSVVYQTEK		1	1	326508482	326508482	0	2	0.4137	0	1	1	691.424	1381.84	1381.66	131.58	0.0909	139980	CID (Collision Induced Dissociation)	MS2		11.177	20.9588	5301	R_DC_KO_C.raw	3.65	0	0.00166
High	Master Protein	326522841	Name:"Similar to FBA5 Fructose-bisphosphate aldolase 5, cytosolic (Arabidopsis thaliana OX=3702)"	0	5.401	6.11111	3	7	1	1	360	37.9	6.4	21.81	3
	Confidence	Identifying Node	PSM Ambiguity	Annotated Sequence	Modifications	# Protein Groups	# Proteins	Master Protein Accessions	Protein Accessions	# Missed Cleavages	Charge	DeltaScore	DeltaCn	Rank	Search Engine Rank	m/z [Da]	MH+ [Da]	Theo. MH+ [Da]	DeltaM [ppm]	Deltam/z [Da]	Intensity	Activation Type	MS Order	Isolation Interference [%]	Ion Inject Time [ms]	RT [min]	First Scan	Spectrum File	XCorr	Percolator q-Value	Percolator PEP
	High	Sequest HT (A11)	Unambiguous	GILAADESTGTIGK		2	3	326516742; 326522841	226316443; 326516742; 326522841	0	2	0.4883	0	1	1	666.257	1331.51	1332.7	-895.66	-0.59682	153198	CID (Collision Induced Dissociation)	MS2		1.81	35.8609	11086	R_DC_KO_C.raw	2.56	0.003442	0.03661
	High	Sequest HT (A11)	Unambiguous	GILAADESTGTIGK		2	3	326516742; 326522841	226316443; 326516742; 326522841	0	2	0.5752	0	1	1	667.424	1333.84	1332.7	855.21	0.56987	1.0649e+06	CID (Collision Induced Dissociation)	MS2		1.141	35.5079	10946	R_DC_KO_C.raw	4.12	0.001312	0.01634
	High	Sequest HT (A11)	Unambiguous	GILAADESTGTIGK		2	3	326516742; 326522841	226316443; 326516742; 326522841	0	2	0.4635	0	1	1	667.757	1334.51	1332.7	1355.45	0.90321	501966	CID (Collision Induced Dissociation)	MS2		0.949	35.4185	10912	R_DC_KO_C.raw	3.56	0.00414	0.05486
	High	Sequest HT (A11)	Unambiguous	GILAADESTGTIGKR		2	3	326516742; 326522841	226316443; 326516742; 326522841	1	2	0.1211	0	1	1	744.509	1488.01	1488.8	-531.79	-0.39586	1.28273e+06	CID (Collision Induced Dissociation)	MS2		1.816	27.7506	7923	R_DC_KO_C.raw	2.23	0.009136	0.1116
	High	Sequest HT (A11)	Unambiguous	GILAADESTGTIGKR		2	3	326516742; 326522841	226316443; 326516742; 326522841	1	2	0.3511	0	1	1	745.509	1490.01	1488.8	811.6	0.60416	446467	CID (Collision Induced Dissociation)	MS2		3.455	27.7161	7910	R_DC_KO_C.raw	3.19	0.0009131	0.01284
	High	Sequest HT (A11)	Unambiguous	GILAADESTGTIGKR		2	3	326516742; 326522841	226316443; 326516742; 326522841	1	2	0.3396	0	1	1	745.342	1489.68	1488.8	587.7	0.43749	253547	CID (Collision Induced Dissociation)	MS2		5.4	26.2124	7319	R_DC_KO_C.raw	3.21	0.0002752	0.004842
	High	Sequest HT (A11)	Unambiguous	YIAtPGKGILAADESTGTIGKR	T4(Phospho)	1	1	326522841	326522841	2	3	0.078	0	1	1	766.842	2298.51	2299.17	-285.68	-0.21894	240623	CID (Collision Induced Dissociation)	MS2		8.791	43.2814	13974	R_DC_KO_C.raw	2.95	0.00414	0.05017
High	Master Protein	326514170	Name:"Similar to HSBP Heat shock factor-binding protein (Arabidopsis thaliana OX=3702)"	0	6.374	36.4583	3	3	3	1	96	10.3	4.36	7.66	3
	Confidence	Identifying Node	PSM Ambiguity	Annotated Sequence	Modifications	# Protein Groups	# Proteins	Master Protein Accessions	Protein Accessions	# Missed Cleavages	Charge	DeltaScore	DeltaCn	Rank	Search Engine Rank	m/z [Da]	MH+ [Da]	Theo. MH+ [Da]	DeltaM [ppm]	Deltam/z [Da]	Intensity	Activation Type	MS Order	Isolation Interference [%]	Ion Inject Time [ms]	RT [min]	First Scan	Spectrum File	XCorr	Percolator q-Value	Percolator PEP
	High	Sequest HT (A11)	Unambiguous	AEMGSDGMTPTK		1	1	326514170	326514170	0	2	0.2253	0	1	1	612.839	1224.67	1224.52	120.86	0.074	78826.3	CID (Collision Induced Dissociation)	MS2		33.3	17.3314	3952	R_DC_KO_C.raw	1.82	0.0009131	0.01272
	High	Sequest HT (A11)	Unambiguous	FQtMsENIITK	T3(Phospho); S5(Phospho)	1	1	326514170	326514170	0	2	0.0759	0	1	1	736.425	1471.84	1471.59	169.18	0.12448	54976	CID (Collision Induced Dissociation)	MS2		19.554	86.0386	30156	R_DC_KO_C.raw	2.37	0.003761	0.03931
	High	Sequest HT (A11)	Unambiguous	IDELELSINDLK		1	1	326514170	326514170	0	2	0.1787	0	1	1	701.508	1402.01	1401.75	186.27	0.13055	202895	CID (Collision Induced Dissociation)	MS2		9.048	66.6338	22992	R_DC_KO_C.raw	3.47	0	0.0008455
High	Master Protein	326504300	Name:"Similar to SKI3 Tetratricopeptide repeat protein SKI3 (Arabidopsis thaliana OX=3702)"	0	2.992	3.68421	2	2	2	1	760	84.6	8.47	6.39	2
	Confidence	Identifying Node	PSM Ambiguity	Annotated Sequence	Modifications	# Protein Groups	# Proteins	Master Protein Accessions	Protein Accessions	# Missed Cleavages	Charge	DeltaScore	DeltaCn	Rank	Search Engine Rank	m/z [Da]	MH+ [Da]	Theo. MH+ [Da]	DeltaM [ppm]	Deltam/z [Da]	Intensity	Activation Type	MS Order	Isolation Interference [%]	Ion Inject Time [ms]	RT [min]	First Scan	Spectrum File	XCorr	Percolator q-Value	Percolator PEP
	High	Sequest HT (A11)	Unambiguous	FIIsALDALQPSK	S4(Phospho)	1	1	326504300	326504300	0	2	0.1679	0	1	1	741.425	1481.84	1482.76	-618.6	-0.45862	30366.7	CID (Collision Induced Dissociation)	MS2		50	92.8145	32464	R_DC_KO_C.raw	2.68	0.001747	0.02756
	High	Sequest HT (A11)	Unambiguous	YAAPQYITRAASSLR		1	1	326504300	326504300	1	2	0.1941	0	1	1	835.094	1669.18	1667.89	775.66	0.64685	123658	CID (Collision Induced Dissociation)	MS2		17.08	54.1468	18193	R_DC_KO_C.raw	3.71	0.003442	0.03693

## Sheet: SHOOT_WT_replicate 1
Protein FDR Confidence	Master	Accession	Description	Exp. q-value	Sum PEP Score	Coverage	# Peptides	# PSMs	# Unique Peptides	# Protein Groups	# AAs	MW [kDa]	calc. pI	Score Sequest HT	# Peptides Sequest HT
High	Master Protein	326526529	Name:"Protein of unknown function"	0	50.59	42.5703	11	31	11	1	249	28.3	6.65	110.01	11
	Confidence	Identifying Node	PSM Ambiguity	Annotated Sequence	Modifications	# Protein Groups	# Proteins	Master Protein Accessions	Protein Accessions	# Missed Cleavages	Charge	DeltaScore	DeltaCn	Rank	Search Engine Rank	m/z [Da]	MH+ [Da]	Theo. MH+ [Da]	DeltaM [ppm]	Deltam/z [Da]	Intensity	Activation Type	MS Order	Isolation Interference [%]	Ion Inject Time [ms]	RT [min]	First Scan	Spectrum File	XCorr	Percolator q-Value	Percolator PEP
	High	Sequest HT (A11)	Unambiguous	VIGEGVEAYDKLQNDLVTAK		1	1	326526529	326526529	1	3	0.1877	0	1	1	721.341	2162.01	2162.13	-57.37	-0.04135	118300	CID (Collision Induced Dissociation)	MS2		11.422	60.8076	20315	L_DC_WT_A.raw	2.93	0.000346	0.01451
	High	Sequest HT (A11)	Unambiguous	VIGEGVEAYDKLQNDLVTAK		1	1	326526529	326526529	1	3	0.1333	0	1	1	721.925	2163.76	2162.13	752.03	0.542	182780	CID (Collision Induced Dissociation)	MS2		4.545	60.5206	20203	L_DC_WT_A.raw	2.85	0.006693	0.09499
	High	Sequest HT (A11)	Unambiguous	VIPETDAGLVEFFLDTDAR		1	1	326526529	326526529	0	2	0.5444	0	1	1	1055.01	2109.02	2108.05	458.86	0.48365	41423.1	CID (Collision Induced Dissociation)	MS2		50	95.6307	33202	L_DC_WT_A.raw	4.39	0	4.534e-06
	High	Sequest HT (A11)	Unambiguous	VIPETDAGLVEFFLDTDAR		1	1	326526529	326526529	0	3	0.383	0	1	1	703.424	2108.26	2108.05	96.88	0.06808	43094.7	CID (Collision Induced Dissociation)	MS2		20.932	95.3627	33109	L_DC_WT_A.raw	3.89	0	0.0004819
	High	Sequest HT (A11)	Unambiguous	VIPETDAGLVEFFLDTDAR		1	1	326526529	326526529	0	3	0.4249	0	1	1	704.008	2110.01	2108.05	927.05	0.65142	142280	CID (Collision Induced Dissociation)	MS2		7.452	94.6682	32870	L_DC_WT_A.raw	4.33	0	0.000282
	High	Sequest HT (A11)	Unambiguous	NELNMSILTLLDENIGSAK		1	1	326526529	326526529	0	3	0.431	0	1	1	692.341	2075.01	2075.07	-29.24	-0.02023	92636.6	CID (Collision Induced Dissociation)	MS2		15.399	94.092	32672	L_DC_WT_A.raw	4.71	0	0.0004888
	High	Sequest HT (A11)	Unambiguous	VIPETDAGLVEFFLDTDAR		1	1	326526529	326526529	0	2	0.4523	0	1	1	1054.85	2108.69	2108.05	300.73	0.31698	28677.9	CID (Collision Induced Dissociation)	MS2		45.118	94.0279	32650	L_DC_WT_A.raw	4.09	0	3.486e-06
	High	Sequest HT (A11)	Selected	NELNMSILTLLDENIGSAK		1	1	326526529	326526529	0	2		0	2	2	1037.43	2073.85	2075.07	-585.19	-0.60716	42654.9	CID (Collision Induced Dissociation)	MS2		12.81	93.5876	32500	L_DC_WT_A.raw	3.22	0	1.046e-05
	High	Sequest HT (A11)	Unambiguous	NELNMSILTLLDENIGSAK		1	1	326526529	326526529	0	3	0.5246	0	1	1	692.841	2076.51	2075.07	693.64	0.47978	74430.4	CID (Collision Induced Dissociation)	MS2		17.05	93.2619	32384	L_DC_WT_A.raw	5.28	0	7.604e-06
	High	Sequest HT (A11)	Unambiguous	NELNMSILTLLDENIGSAK		1	1	326526529	326526529	0	3	0.3237	0	1	1	693.424	2078.26	2075.07	1537	1.06313	45453	CID (Collision Induced Dissociation)	MS2		15.131	93.1813	32357	L_DC_WT_A.raw	3.8	0.000346	0.0127
	High	Sequest HT (A11)	Unambiguous	tLLDMVERNELNMSILTLLDENIGSAK	T1(Phospho)	1	1	326526529	326526529	1	3	0.1433	0	1	1	1038.51	3113.53	3112.53	320.55	0.33257	62070.6	CID (Collision Induced Dissociation)	MS2		28.156	92.9628	32282	L_DC_WT_A.raw	3.35	0	0.003031
	High	Sequest HT (A11)	Unambiguous	NELNMSILTLLDENIGSAK		1	1	326526529	326526529	0	2	0.5884	0	1	1	1038.51	2076.02	2075.07	458.97	0.4762	62070.6	CID (Collision Induced Dissociation)	MS2		28.156	92.9628	32282	L_DC_WT_A.raw	6.05	0	3.943e-06
	High	Sequest HT (A11)	Unambiguous	NELNmSILTLLDENIGSAK	M5(Oxidation)	1	1	326526529	326526529	0	2	0.1073	0	1	1	1045.76	2090.52	2091.06	-259.31	-0.27112	79701.8	CID (Collision Induced Dissociation)	MS2		34.64	88.8029	30820	L_DC_WT_A.raw	3.17	0	0.0003201
	High	Sequest HT (A11)	Unambiguous	NELNmSILTLLDENIGSAK	M5(Oxidation)	1	1	326526529	326526529	0	2	0.4485	0	1	1	1046.43	2091.85	2091.06	378.33	0.39556	44326.8	CID (Collision Induced Dissociation)	MS2		49.441	88.409	30682	L_DC_WT_A.raw	5.24	0	5.394e-08
	High	Sequest HT (A11)	Unambiguous	NELNmSILTLLDENIGSAK	M5(Oxidation)	1	1	326526529	326526529	0	2	0.1703	0	1	1	1046.93	2092.85	2091.06	856.57	0.89557	86129	CID (Collision Induced Dissociation)	MS2		17.756	88.0883	30567	L_DC_WT_A.raw	2.76	0.004304	0.07039
	High	Sequest HT (A11)	Unambiguous	NELNmSILTLLDENIGSAK	M5(Oxidation)	1	1	326526529	326526529	0	3	0.0882	0	1	1	697.758	2091.26	2091.06	93.12	0.06491	94040.9	CID (Collision Induced Dissociation)	MS2		10.332	88.0393	30549	L_DC_WT_A.raw	3.63	0	0.00513
	High	Sequest HT (A11)	Unambiguous	VIGEGVEAYDK		1	1	326526529	326526529	0	2	0.25	0	1	1	590.839	1180.67	1179.59	916.8	0.54072	148675	CID (Collision Induced Dissociation)	MS2		10.418	30.2926	8680	L_DC_WT_A.raw	2.64	0.004079	0.06531
	High	Sequest HT (A11)	Unambiguous	LTNILQSK		1	1	326526529	326526529	0	2	0.2983	0	1	1	458.836	916.666	916.546	130.19	0.05966	303743	CID (Collision Induced Dissociation)	MS2		2.476	29.9142	8537	L_DC_WT_A.raw	2.38	0.007362	0.1045
	High	Sequest HT (A11)	Unambiguous	LTNILQSK		1	1	326526529	326526529	0	2	0.1604	0	1	1	459.836	918.666	916.546	2312.34	1.05968	322283	CID (Collision Induced Dissociation)	MS2		1.737	29.5337	8393	L_DC_WT_A.raw	2.68	0.001159	0.0294
	High	Sequest HT (A11)	Unambiguous	VIGEGVEAYDK		1	1	326526529	326526529	0	2	0.2561	0	1	1	591.756	1182.5	1179.59	2471.04	1.45741	132993	CID (Collision Induced Dissociation)	MS2		5.498	29.3417	8319	L_DC_WT_A.raw	3.28	0.000346	0.01376
	High	Sequest HT (A11)	Unambiguous	LQNDLVTAK		1	1	326526529	326526529	0	2	0.1667	0	1	1	501.254	1001.5	1001.56	-61.98	-0.03104	218852	CID (Collision Induced Dissociation)	MS2		5.188	22.2995	5690	L_DC_WT_A.raw	2.04	0.005655	0.08647
	High	Sequest HT (A11)	Unambiguous	AAFDLQVK		1	1	326526529	326526529	0	2	0.3102	0	1	1	446.336	891.665	891.493	192.49	0.0858	869541	CID (Collision Induced Dissociation)	MS2		1.54	38.5056	11775	L_DC_WT_A.raw	2.45	0.001888	0.03919
	High	Sequest HT (A11)	Unambiguous	ASNQEEAVAFmEDVR	M11(Oxidation)	1	1	326526529	326526529	0	2	0.4661	0	1	1	856.344	1711.68	1711.76	-45.73	-0.03914	137886	CID (Collision Induced Dissociation)	MS2		12.582	38.7407	11866	L_DC_WT_A.raw	4.42	0	0.0003623
	High	Sequest HT (A11)	Unambiguous	ASNQEEAVAFmEDVR	M11(Oxidation)	1	1	326526529	326526529	0	2	0.1564	0	1	1	856.677	1712.35	1711.76	343.74	0.2942	49613.1	CID (Collision Induced Dissociation)	MS2		39.124	40.204	12419	L_DC_WT_A.raw	3.26	0.001417	0.03065
	High	Sequest HT (A11)	Unambiguous	ASNQEEAVAFMEDVR		1	1	326526529	326526529	0	2	0.4935	0	1	1	847.844	1694.68	1695.76	-639.06	-0.54185	71318	CID (Collision Induced Dissociation)	MS2		4.67	59.323	19741	L_DC_WT_A.raw	3.83	0	0.001515
	High	Sequest HT (A11)	Unambiguous	ASNQEEAVAFMEDVR		1	1	326526529	326526529	0	2	0.4567	0	1	1	848.427	1695.85	1695.76	48.94	0.0415	508185	CID (Collision Induced Dissociation)	MS2		2.689	59.1102	19658	L_DC_WT_A.raw	4.73	0	0.0007788
	High	Sequest HT (A11)	Unambiguous	ASNQEEAVAFMEDVR		1	1	326526529	326526529	0	3	0.306	0	1	1	566.172	1696.5	1695.76	434.39	0.24554	381897	CID (Collision Induced Dissociation)	MS2		2.075	58.9414	19592	L_DC_WT_A.raw	4.02	0.000346	0.01103
	High	Sequest HT (A11)	Unambiguous	TLLDMVER		1	1	326526529	326526529	0	2	0.3378	0	1	1	488.754	976.5	976.513	-13.48	-0.00658	652284	CID (Collision Induced Dissociation)	MS2		2.773	54.8828	18020	L_DC_WT_A.raw	2.22	0.004079	0.06412
	High	Sequest HT (A11)	Unambiguous	LIELEAMQK		1	1	326526529	326526529	0	2	0.2247	0	1	1	538.338	1075.67	1074.59	1007.13	0.54113	113913	CID (Collision Induced Dissociation)	MS2		4.608	44.0148	13849	L_DC_WT_A.raw	2.67	0.0008975	0.02622
	High	Sequest HT (A11)	Unambiguous	LIELEAMQK		1	1	326526529	326526529	0	2	0.1588	0	1	1	538.755	1076.5	1074.59	1782.64	0.9578	153862	CID (Collision Induced Dissociation)	MS2		10.415	43.7651	13757	L_DC_WT_A.raw	2.77	0.003013	0.04842
	High	Sequest HT (A11)	Unambiguous	LIELEAMQK		1	1	326526529	326526529	0	2	0.354	0	1	1	537.755	1074.5	1074.59	-78.58	-0.04222	186116	CID (Collision Induced Dissociation)	MS2		4.173	42.3395	13216	L_DC_WT_A.raw	2.91	0.001417	0.03119
High	Master Protein	326490876	Name:"Similar to TL20.3 Thylakoid lumenal protein TL20.3, chloroplastic (Arabidopsis thaliana OX=3702)"	0	44.175	44.9438	8	26	8	1	267	28	8.68	90.19	8
	Confidence	Identifying Node	PSM Ambiguity	Annotated Sequence	Modifications	# Protein Groups	# Proteins	Master Protein Accessions	Protein Accessions	# Missed Cleavages	Charge	DeltaScore	DeltaCn	Rank	Search Engine Rank	m/z [Da]	MH+ [Da]	Theo. MH+ [Da]	DeltaM [ppm]	Deltam/z [Da]	Intensity	Activation Type	MS Order	Isolation Interference [%]	Ion Inject Time [ms]	RT [min]	First Scan	Spectrum File	XCorr	Percolator q-Value	Percolator PEP
	High	Sequest HT (A11)	Unambiguous	MVLNEANLTNAVLSR		1	1	326490876	326490876	0	2	0.4933	0	1	1	823.01	1645.01	1644.87	84.62	0.06959	198400	CID (Collision Induced Dissociation)	MS2		8.123	66.0566	22342	L_DC_WT_A.raw	4.48	0	0.0003871
	High	Sequest HT (A11)	Unambiguous	MVLNEANLTNAVLSR		1	1	326490876	326490876	0	2	0.2169	0	1	1	823.01	1645.01	1644.87	84.62	0.06959	89993.6	CID (Collision Induced Dissociation)	MS2		18.825	64.662	21809	L_DC_WT_A.raw	2.72	0.000346	0.01347
	High	Sequest HT (A11)	Unambiguous	GEFGIGSAAQFGNADLK		1	1	326490876	326490876	0	2	0.2476	0	1	1	841.344	1681.68	1681.82	-81.87	-0.06885	108065	CID (Collision Induced Dissociation)	MS2		12.454	61.7002	20660	L_DC_WT_A.raw	3.15	0.007362	0.101
	High	Sequest HT (A11)	Unambiguous	GEFGIGSAAQFGNADLK		1	1	326490876	326490876	0	2	0.0517	0	1	1	841.927	1682.85	1681.82	611.83	0.5145	78627.2	CID (Collision Induced Dissociation)	MS2		15.013	61.4994	20582	L_DC_WT_A.raw	2.71	0.005068	0.07952
	High	Sequest HT (A11)	Unambiguous	ANFTGADLSDTLMDR		1	1	326490876	326490876	0	2	0.3542	0	1	1	813.427	1625.85	1626.74	-551.34	-0.44845	128306	CID (Collision Induced Dissociation)	MS2		4.816	60.939	20366	L_DC_WT_A.raw	2.88	0	0.000287
	High	Sequest HT (A11)	Unambiguous	MVLNEANLTNAVLSR		1	1	326490876	326490876	0	2	0.4663	0	1	1	821.927	1642.85	1644.87	-1232.63	-1.01376	77373.9	CID (Collision Induced Dissociation)	MS2		6.412	66.1811	22391	L_DC_WT_A.raw	3.86	0	5.346e-05
	High	Sequest HT (A11)	Unambiguous	SDLGGATIEGADFSDAVIDLPQK		1	1	326490876	326490876	0	2	0.5724	0	1	1	1160.52	2320.03	2319.14	384.17	0.44547	123610	CID (Collision Induced Dissociation)	MS2		13.004	76.1647	26193	L_DC_WT_A.raw	6.01	0	1.579e-05
	High	Sequest HT (A11)	Unambiguous	SDLGGATIEGADFSDAVIDLPQK		1	1	326490876	326490876	0	3	0.2133	0	1	1	774.343	2321.01	2319.14	809.75	0.62597	122850	CID (Collision Induced Dissociation)	MS2		4.757	76.9782	26500	L_DC_WT_A.raw	3.61	0.000346	0.009036
	High	Sequest HT (A11)	Unambiguous	SDLGGATIEGADFSDAVIDLPQK		1	1	326490876	326490876	0	2	0.3538	0	1	1	1160.93	2320.86	2319.14	743.51	0.86215	85855.3	CID (Collision Induced Dissociation)	MS2		34.639	79.2338	27338	L_DC_WT_A.raw	3.9	0.004918	0.07551
	High	Sequest HT (A11)	Unambiguous	SDLGGATIEGADFSDAVIDLPQK		1	1	326490876	326490876	0	2	0.3705	0	1	1	1161.1	2321.19	2319.14	887.24	1.02882	68871.5	CID (Collision Induced Dissociation)	MS2		38.624	78.3151	26998	L_DC_WT_A.raw	4.48	0.000346	0.0102
	High	Sequest HT (A11)	Unambiguous	ANFTGADLSDTLMDR		1	1	326490876	326490876	0	2	0.5297	0	1	1	813.843	1626.68	1626.74	-39.06	-0.03177	381235	CID (Collision Induced Dissociation)	MS2		4.328	60.3744	20146	L_DC_WT_A.raw	3.7	0	0.0001109
	High	Sequest HT (A11)	Unambiguous	yEADQRGEFGIGSAAQFGNADLK	Y1(Phospho)	1	1	326490876	326490876	1	3	0.0542	0	1	1	841.344	2522.02	2524.11	-830.85	-0.69905	168277	CID (Collision Induced Dissociation)	MS2		7.943	59.9569	19985	L_DC_WT_A.raw	2.77	0.000346	0.01328
	High	Sequest HT (A11)	Unambiguous	GEFGIGSAAQFGNADLK		1	1	326490876	326490876	0	2	0.4954	0	1	1	841.344	1681.68	1681.82	-81.87	-0.06885	168277	CID (Collision Induced Dissociation)	MS2		7.943	59.9569	19985	L_DC_WT_A.raw	5.47	0	2.197e-06
	High	Sequest HT (A11)	Unambiguous	ESDFSGSTFNGAYmEK	M14(Oxidation)	1	1	326490876	326490876	0	2	0.296	0	1	1	893.261	1785.52	1785.73	-118.47	-0.10577	74584.9	CID (Collision Induced Dissociation)	MS2		24.502	38.4784	11766	L_DC_WT_A.raw	2.5	0	0.001888
	High	Sequest HT (A11)	Unambiguous	YASGTNPITGVSTR		1	1	326490876	326490876	0	2	0.2311	0	1	1	712.341	1423.68	1423.72	-29.67	-0.02112	64420.6	CID (Collision Induced Dissociation)	MS2		14.509	32.3825	9467	L_DC_WT_A.raw	2.64	0.001417	0.03106
	High	Sequest HT (A11)	Unambiguous	YASGTNPITGVSTR		1	1	326490876	326490876	0	2	0.3534	0	1	1	712.341	1423.68	1423.72	-29.67	-0.02112	356037	CID (Collision Induced Dissociation)	MS2		4.721	30.8199	8877	L_DC_WT_A.raw	3.48	0	1.772e-05
	High	Sequest HT (A11)	Unambiguous	YASGTNPITGVSTR		1	1	326490876	326490876	0	2	0.2194	0	1	1	712.758	1424.51	1423.72	555.66	0.39555	82475.8	CID (Collision Induced Dissociation)	MS2		17.174	30.1255	8617	L_DC_WT_A.raw	3.51	0	0.0004758
	High	Sequest HT (A11)	Unambiguous	YASGTNPITGVSTR		1	1	326490876	326490876	0	2	0.1531	0	1	1	713.675	1426.34	1423.72	1843.4	1.31224	74280	CID (Collision Induced Dissociation)	MS2		13.15	30.0269	8581	L_DC_WT_A.raw	2.09	0.001417	0.03104
	High	Sequest HT (A11)	Unambiguous	mVLNEANLTNAVLSR	M1(Oxidation)	1	1	326490876	326490876	0	2	0.0573	0	1	1	830.344	1659.68	1660.87	-715.76	-0.59439	173957	CID (Collision Induced Dissociation)	MS2		13.157	59.3105	19736	L_DC_WT_A.raw	2.62	0	0.0009657
	High	Sequest HT (A11)	Unambiguous	GEFGIGSAAQFGNADLK		1	1	326490876	326490876	0	2	0.3595	0	1	1	840.26	1679.51	1681.82	-1370.19	-1.1522	130129	CID (Collision Induced Dissociation)	MS2		12.433	58.5447	19439	L_DC_WT_A.raw	3.06	0	0.0003421
	High	Sequest HT (A11)	Unambiguous	ANFTGADLSDTLmDR	M13(Oxidation)	1	1	326490876	326490876	0	2	0.2063	0	1	1	822.927	1644.85	1642.74	1283.56	1.05428	139245	CID (Collision Induced Dissociation)	MS2		6.971	52.9112	17255	L_DC_WT_A.raw	2.86	0	0.007843
	High	Sequest HT (A11)	Unambiguous	ANFTGADLSDTLmDR	M13(Oxidation)	1	1	326490876	326490876	0	2	0.0638	0	1	1	821.343	1641.68	1642.74	-644.15	-0.52908	161958	CID (Collision Induced Dissociation)	MS2		12.083	52.6234	17143	L_DC_WT_A.raw	2.82	0	0.0008751
	High	Sequest HT (A11)	Unambiguous	ESDFSGSTFNGAYMEK		1	1	326490876	326490876	0	2	0.3986	0	1	1	885.345	1769.68	1769.73	-28.41	-0.02514	67103.7	CID (Collision Induced Dissociation)	MS2		36.865	46.4639	14775	L_DC_WT_A.raw	4.29	0	6.031e-05
	High	Sequest HT (A11)	Unambiguous	ESDFSGSTFNGAYMEK		1	1	326490876	326490876	0	2	0.4751	0	1	1	885.761	1770.52	1769.73	442.48	0.39154	41073.1	CID (Collision Induced Dissociation)	MS2		33.553	46.3644	14737	L_DC_WT_A.raw	3.81	0	5.58e-05
	High	Sequest HT (A11)	Unambiguous	ESDFSGSTFNGAYmEK	M14(Oxidation)	1	1	326490876	326490876	0	2	0.2291	0	1	1	893.678	1786.35	1785.73	348.21	0.3109	73499.8	CID (Collision Induced Dissociation)	MS2		21.612	40.4735	12518	L_DC_WT_A.raw	2.75	0.007362	0.1072
	High	Sequest HT (A11)	Unambiguous	DGFcDEASGLcDAK	C4(Carbamidomethyl); C11(Carbamidomethyl)	1	1	326490876	326490876	0	2	0.5087	0	1	1	772.759	1544.51	1544.6	-57.08	-0.04409	301148	CID (Collision Induced Dissociation)	MS2		4.714	39.8373	12280	L_DC_WT_A.raw	4.03	0	0.0001715
High	Master Protein	263935	CW21=non-specific lipid transfer protein [barley, cv. Bomi, leaves, Peptide, 90 aa]	0	24.318	47.7778	2	23	2	1	90	8.7	9.04	89.44	2
	Confidence	Identifying Node	PSM Ambiguity	Annotated Sequence	Modifications	# Protein Groups	# Proteins	Master Protein Accessions	Protein Accessions	# Missed Cleavages	Charge	DeltaScore	DeltaCn	Rank	Search Engine Rank	m/z [Da]	MH+ [Da]	Theo. MH+ [Da]	DeltaM [ppm]	Deltam/z [Da]	Intensity	Activation Type	MS Order	Isolation Interference [%]	Ion Inject Time [ms]	RT [min]	First Scan	Spectrum File	XCorr	Percolator q-Value	Percolator PEP
	High	Sequest HT (A11)	Unambiguous	AAGIPSMcGVSVPYAISASVDcSK	C8(Carbamidomethyl); C22(Carbamidomethyl)	1	7	263935	1098265; 1480926; 2497744; 1027485280; 587446; 443799; 263935	0	3	0.5195	0	1	1	809.177	2425.51	2427.14	-667.57	-0.5401	109229	CID (Collision Induced Dissociation)	MS2		1.891	74.1029	25420	L_DC_WT_A.raw	4.62	0	0.0002795
	High	Sequest HT (A11)	Unambiguous	AAGIPSMcGVSVPYAISASVDcSK	C8(Carbamidomethyl); C22(Carbamidomethyl)	1	7	263935	1098265; 1480926; 2497744; 1027485280; 587446; 443799; 263935	0	3	0.5569	0	1	1	810.093	2428.27	2427.14	465.47	0.37659	720207	CID (Collision Induced Dissociation)	MS2		1.884	74.0516	25400	L_DC_WT_A.raw	5.01	0	0.0001495
	High	Sequest HT (A11)	Unambiguous	AAGIPSMcGVSVPYAISASVDcSK	C8(Carbamidomethyl); C22(Carbamidomethyl)	1	7	263935	1098265; 1480926; 2497744; 1027485280; 587446; 443799; 263935	0	3	0.3084	0	1	1	810.76	2430.27	2427.14	1289.51	1.04327	461629	CID (Collision Induced Dissociation)	MS2		1.484	73.96	25366	L_DC_WT_A.raw	4.28	0	0.00246
	High	Sequest HT (A11)	Unambiguous	AAGIPSMcGVSVPYAISASVDcSK	C8(Carbamidomethyl); C22(Carbamidomethyl)	1	7	263935	1098265; 1480926; 2497744; 1027485280; 587446; 443799; 263935	0	2	0.5378	0	1	1	1214.02	2427.03	2427.14	-44.17	-0.0536	135929	CID (Collision Induced Dissociation)	MS2		5.384	73.8884	25339	L_DC_WT_A.raw	4.37	0	0.0001685
	High	Sequest HT (A11)	Unambiguous	AAGIPSMCGVsVPYAISASVDcSK	S11(Phospho); C22(Carbamidomethyl)	1	7	263935	1098265; 1480926; 2497744; 1027485280; 587446; 443799; 263935	0	3	0.0973	0	1	1	817.927	2451.77	2450.08	687.88	0.56178	111937	CID (Collision Induced Dissociation)	MS2		12.201	73.8063	25308	L_DC_WT_A.raw	4.01	0.0008975	0.02343
	High	Sequest HT (A11)	Unambiguous	AAGIPSMcGVSVPYAISASVDcSK	C8(Carbamidomethyl); C22(Carbamidomethyl)	1	7	263935	1098265; 1480926; 2497744; 1027485280; 587446; 443799; 263935	0	2	0.5408	0	1	1	1214.43	2427.86	2427.14	299.18	0.36308	184411	CID (Collision Induced Dissociation)	MS2		5.923	73.6241	25238	L_DC_WT_A.raw	4.53	0	0.00014
	High	Sequest HT (A11)	Unambiguous	AAGIPSMcGVSVPYAISASVDcSK	C8(Carbamidomethyl); C22(Carbamidomethyl)	1	7	263935	1098265; 1480926; 2497744; 1027485280; 587446; 443799; 263935	0	2	0.4273	0	1	1	1215.43	2429.86	2427.14	1123.21	1.36309	190995	CID (Collision Induced Dissociation)	MS2		5.455	73.5311	25203	L_DC_WT_A.raw	4.33	0	4.749e-05
	High	Sequest HT (A11)	Unambiguous	AAGIPSMcGVSVPYAISASVDcSK	C8(Carbamidomethyl); C22(Carbamidomethyl)	1	7	263935	1098265; 1480926; 2497744; 1027485280; 587446; 443799; 263935	0	3	0.0534	0	1	1	810.177	2428.52	2427.14	568.48	0.45992	129327	CID (Collision Induced Dissociation)	MS2		12.747	75.5803	25976	L_DC_WT_A.raw	3.56	0.0006467	0.01643
	High	Sequest HT (A11)	Unambiguous	AAGIPSmcGVSVPYAISASVDcSK	M7(Oxidation); C8(Carbamidomethyl); C22(Carbamidomethyl)	1	7	263935	1098265; 1480926; 2497744; 1027485280; 587446; 443799; 263935	0	3	0.3709	0	1	1	815.343	2444.02	2443.13	362.3	0.29505	425308	CID (Collision Induced Dissociation)	MS2		2.899	63.8131	21477	L_DC_WT_A.raw	3.99	0	0.0002752
	High	Sequest HT (A11)	Unambiguous	AAGIPSmcGVSVPYAISASVDcSK	M7(Oxidation); C8(Carbamidomethyl); C22(Carbamidomethyl)	1	7	263935	1098265; 1480926; 2497744; 1027485280; 587446; 443799; 263935	0	2	0.56	0	1	1	1221.85	2442.7	2443.13	-178.11	-0.21757	161672	CID (Collision Induced Dissociation)	MS2		19.233	63.6958	21432	L_DC_WT_A.raw	4.25	0	5.919e-05
	High	Sequest HT (A11)	Unambiguous	AAGIPSmcGVSVPYAISASVDcSK	M7(Oxidation); C8(Carbamidomethyl); C22(Carbamidomethyl)	1	7	263935	1098265; 1480926; 2497744; 1027485280; 587446; 443799; 263935	0	2	0.5563	0	1	1	1222.68	2444.36	2443.13	504.09	0.61578	62888.8	CID (Collision Induced Dissociation)	MS2		16.56	63.5115	21360	L_DC_WT_A.raw	4.44	0	7.575e-06
	High	Sequest HT (A11)	Unambiguous	AAGIPSmcGVSVPYAISASVDcSK	M7(Oxidation); C8(Carbamidomethyl); C22(Carbamidomethyl)	1	7	263935	1098265; 1480926; 2497744; 1027485280; 587446; 443799; 263935	0	3	0.2207	0	1	1	816.01	2446.02	2443.13	1180.94	0.96173	119203	CID (Collision Induced Dissociation)	MS2		5.421	63.3652	21303	L_DC_WT_A.raw	3.58	0	0.002029
	High	Sequest HT (A11)	Unambiguous	AAGIPSMcGVSVPYAISASVDcSK	C8(Carbamidomethyl); C22(Carbamidomethyl)	1	7	263935	1098265; 1480926; 2497744; 1027485280; 587446; 443799; 263935	0	2	0.2918	0	1	1	1214.52	2428.03	2427.14	367.85	0.44641	69897.6	CID (Collision Induced Dissociation)	MS2		37.017	75.7586	26043	L_DC_WT_A.raw	3.29	0	0.004076
	High	Sequest HT (A11)	Unambiguous	AAGIPSMcGVSVPYAISASVDcSK	C8(Carbamidomethyl); C22(Carbamidomethyl)	1	7	263935	1098265; 1480926; 2497744; 1027485280; 587446; 443799; 263935	0	2	0.361	0	1	1	1214.93	2428.86	2427.14	711.2	0.86309	76852.7	CID (Collision Induced Dissociation)	MS2		19.218	77.2243	26591	L_DC_WT_A.raw	3.49	0.001159	0.03041
	High	Sequest HT (A11)	Unambiguous	AIScGQVSSALSPcISYAR	C4(Carbamidomethyl); C14(Carbamidomethyl)	1	1	263935	263935	0	2	0.3038	0	1	1	1014.1	2027.19	2026.97	107.82	0.10927	97693.7	CID (Collision Induced Dissociation)	MS2		11.114	59.5077	19813	L_DC_WT_A.raw	2.93	0	0.006396
	High	Sequest HT (A11)	Unambiguous	AIScGQVSSALSPcISYAR	C4(Carbamidomethyl); C14(Carbamidomethyl)	1	1	263935	263935	0	2	0.2296	0	1	1	1015.01	2029.02	2026.97	1012.31	1.02596	187526	CID (Collision Induced Dissociation)	MS2		8.588	58.6477	19478	L_DC_WT_A.raw	3.92	0	0.00666
	High	Sequest HT (A11)	Selected	AIScGQVSSALSPcISYAR	C4(Carbamidomethyl); C14(Carbamidomethyl)	1	1	263935	263935	0	2		0.0167	3	3	1015.43	2029.85	2026.97	1423.44	1.44263	164902	CID (Collision Induced Dissociation)	MS2		14.934	57.3668	18980	L_DC_WT_A.raw	2.95	0.003013	0.04799
	High	Sequest HT (A11)	Unambiguous	AIScGQVSSALSPcISYAR	C4(Carbamidomethyl); C14(Carbamidomethyl)	1	1	263935	263935	0	2	0.4391	0	1	1	1013.6	2026.19	2026.97	-385.54	-0.39074	116889	CID (Collision Induced Dissociation)	MS2		24.058	57.2362	18930	L_DC_WT_A.raw	4.19	0	0.000617
	High	Sequest HT (A11)	Unambiguous	AIScGQVSSALSPcISYAR	C4(Carbamidomethyl); C14(Carbamidomethyl)	1	1	263935	263935	0	2	0.3593	0	1	1	1014.43	2027.85	2026.97	436.72	0.44261	187573	CID (Collision Induced Dissociation)	MS2		12.41	55.9688	18439	L_DC_WT_A.raw	3.98	0	0.0008105
	High	Sequest HT (A11)	Unambiguous	AIScGQVSSALSPcISYAR	C4(Carbamidomethyl); C14(Carbamidomethyl)	1	1	263935	263935	0	2	0.3649	0	1	1	1014.85	2028.69	2026.97	847.85	0.85929	106411	CID (Collision Induced Dissociation)	MS2		14.482	55.8399	18389	L_DC_WT_A.raw	3.59	0	0.001311
	High	Sequest HT (A11)	Unambiguous	AIScGQVSSALSPcISYAR	C4(Carbamidomethyl); C14(Carbamidomethyl)	1	1	263935	263935	0	3	0.2154	0	1	1	676.674	2028.01	2026.97	512.51	0.34628	486197	CID (Collision Induced Dissociation)	MS2		2.847	54.8849	18021	L_DC_WT_A.raw	3.11	0.005068	0.08226
	High	Sequest HT (A11)	Unambiguous	AIScGQVSSALSPcISYAR	C4(Carbamidomethyl); C14(Carbamidomethyl)	1	1	263935	263935	0	2	0.5526	0	1	1	1014.43	2027.85	2026.97	436.72	0.44261	1.19087e+06	CID (Collision Induced Dissociation)	MS2		1.391	54.4241	17840	L_DC_WT_A.raw	4.18	0	1.685e-05
	High	Sequest HT (A11)	Unambiguous	AIScGQVSSALSPcISYAR	C4(Carbamidomethyl); C14(Carbamidomethyl)	1	1	263935	263935	0	2	0.1479	0	1	1	1014.76	2028.52	2026.97	765.63	0.77595	62639.1	CID (Collision Induced Dissociation)	MS2		17.716	53.059	17313	L_DC_WT_A.raw	2.84	0	0.0005746
High	Master Protein	326509461	Name:"Similar to PETF Ferredoxin, chloroplastic (Triticum aestivum OX=4565)"	0	14.906	89.011	3	12	3	1	91	10	3.98	42.85	3
	Confidence	Identifying Node	PSM Ambiguity	Annotated Sequence	Modifications	# Protein Groups	# Proteins	Master Protein Accessions	Protein Accessions	# Missed Cleavages	Charge	DeltaScore	DeltaCn	Rank	Search Engine Rank	m/z [Da]	MH+ [Da]	Theo. MH+ [Da]	DeltaM [ppm]	Deltam/z [Da]	Intensity	Activation Type	MS Order	Isolation Interference [%]	Ion Inject Time [ms]	RT [min]	First Scan	Spectrum File	XCorr	Percolator q-Value	Percolator PEP
	High	Sequest HT (A11)	Unambiguous	LVSGEIDQSDQSFLDDDQmEAGWVLTcHAYPK	M19(Oxidation); C27(Carbamidomethyl)	1	1	326509461	326509461	0	3	0.2427	0	1	1	1224.43	3671.29	3670.63	179.22	0.21929	105125	CID (Collision Induced Dissociation)	MS2		26.704	75.3732	25900	L_DC_WT_A.raw	3.79	0	0.003213
	High	Sequest HT (A11)	Selected	LVTPEGEVELEVPDDVYILDQAEEEGIDLPYScR	C33(Carbamidomethyl)	1	3	326509461	34921267; 228308; 326509461	0	3	0.0212	0	1	1	1298.44	3893.29	3891.84	374.26	0.48551	34044.4	CID (Collision Induced Dissociation)	MS2		50	99.4005	34479	L_DC_WT_A.raw	2.83	0	0.007442
	High	Sequest HT (A11)	Unambiguous	LVTPEGEVELEVPDDVYILDQAEEEGIDLPYScR	C33(Carbamidomethyl)	1	3	326509461	34921267; 228308; 326509461	0	3	0.0659	0	1	1	1298.6	3893.79	3891.84	502.73	0.65218	37795.6	CID (Collision Induced Dissociation)	MS2		47.381	99.2009	34413	L_DC_WT_A.raw	3.34	0	0.006522
	High	Sequest HT (A11)	Unambiguous	LVTPEGEVELEVPDDVyILDQAEEEGIDLPYSCR	Y17(Phospho)	1	3	326509461	34921267; 228308; 326509461	0	3	0.0829	0	1	1	1306.19	3916.54	3914.78	450.12	0.58738	30435.1	CID (Collision Induced Dissociation)	MS2		40.663	97.5771	33863	L_DC_WT_A.raw	3.62	0	0.0001807
	High	Sequest HT (A11)	Unambiguous	LVTPEGEVELEVPDDVYILDQAEEEGIDLPYScR	C33(Carbamidomethyl)	1	3	326509461	34921267; 228308; 326509461	0	3	0.4245	0	1	1	1298.19	3892.54	3891.84	181.54	0.23551	18938.7	CID (Collision Induced Dissociation)	MS2		31.657	96.9489	33649	L_DC_WT_A.raw	4.57	0	0.0004963
	High	Sequest HT (A11)	Unambiguous	LVSGEIDQSDQSFLDDDQMEAGWVLTcHAYPK	C27(Carbamidomethyl)	1	1	326509461	326509461	0	3	0.3589	0	1	1	1219.52	3656.54	3654.64	520.57	0.63417	40160.1	CID (Collision Induced Dissociation)	MS2		28.513	80.3792	27764	L_DC_WT_A.raw	5.21	0	0.0007545
	High	Sequest HT (A11)	Unambiguous	SDIVIETHKEEELTA		1	1	326509461	326509461	1	2	0.4984	0	1	1	856.511	1712.01	1713.85	-1073.54	-0.91994	74807.8	CID (Collision Induced Dissociation)	MS2		14.013	37.2931	11319	L_DC_WT_A.raw	3.09	0	0.005706
	High	Sequest HT (A11)	Unambiguous	SDIVIETHKEEELTA		1	1	326509461	326509461	1	2	0.4399	0	1	1	857.427	1713.85	1713.85	-3.8	-0.00326	97676.2	CID (Collision Induced Dissociation)	MS2		7.586	37.2831	11315	L_DC_WT_A.raw	3.66	0.004079	0.06821
	High	Sequest HT (A11)	Unambiguous	SDIVIETHKEEELTA		1	1	326509461	326509461	1	2	0.1115	0	1	1	858.344	1715.68	1713.85	1065.93	0.91343	195033	CID (Collision Induced Dissociation)	MS2		5.157	37.1283	11255	L_DC_WT_A.raw	2.69	0.002668	0.04327
	High	Sequest HT (A11)	Unambiguous	SDIVIETHKEEELTA		1	1	326509461	326509461	1	2	0.509	0	1	1	856.427	1711.85	1713.85	-1170.79	-1.00328	90687.6	CID (Collision Induced Dissociation)	MS2		36.959	35.8245	10761	L_DC_WT_A.raw	3.32	0	0.008011
	High	Sequest HT (A11)	Unambiguous	SDIVIETHKEEELTA		1	1	326509461	326509461	1	2	0.4191	0	1	1	857.427	1713.85	1713.85	-3.8	-0.00326	186329	CID (Collision Induced Dissociation)	MS2		6.03	35.7019	10714	L_DC_WT_A.raw	3.77	0	0.005749
	High	Sequest HT (A11)	Unambiguous	SDIVIETHKEEELTA		1	1	326509461	326509461	1	2	0.2128	0	1	1	858.427	1715.85	1713.85	1163.18	0.99676	110964	CID (Collision Induced Dissociation)	MS2		10.176	35.5691	10664	L_DC_WT_A.raw	2.96	0.001888	0.03325
High	Master Protein	326498983	Name:"Similar to TOC159 Translocase of chloroplast 159, chloroplastic (Arabidopsis thaliana OX=3702)"	0	11.278	4.42416	3	5	3	1	1424	152.1	4.51	18.06	3
	Confidence	Identifying Node	PSM Ambiguity	Annotated Sequence	Modifications	# Protein Groups	# Proteins	Master Protein Accessions	Protein Accessions	# Missed Cleavages	Charge	DeltaScore	DeltaCn	Rank	Search Engine Rank	m/z [Da]	MH+ [Da]	Theo. MH+ [Da]	DeltaM [ppm]	Deltam/z [Da]	Intensity	Activation Type	MS Order	Isolation Interference [%]	Ion Inject Time [ms]	RT [min]	First Scan	Spectrum File	XCorr	Percolator q-Value	Percolator PEP
	High	Sequest HT (A11)	Unambiguous	DGKDAsEGEGEGKEEAAAAAK	S6(Phospho)	1	1	326498983	326498983	2	3	0.195	0	1	1	701.008	2101.01	2099.88	539.19	0.37741	14790	CID (Collision Induced Dissociation)	MS2		50	14.1753	2922	L_DC_WT_A.raw	4	0.003914	0.06248
	High	Sequest HT (A11)	Unambiguous	LAEVATGGEDDGEFDSEK		1	1	326498983	326498983	0	2	0.5783	0	1	1	934.846	1868.68	1868.8	-63.82	-0.05964	151615	CID (Collision Induced Dissociation)	MS2		13.103	36.0564	10848	L_DC_WT_A.raw	4.98	0	9.783e-08
	High	Sequest HT (A11)	Unambiguous	AAPVADERPPAADADEVAAAEGTK		1	1	326498983	326498983	0	3	0.2943	0	1	1	774.676	2322.01	2322.12	-46.43	-0.03594	90734.7	CID (Collision Induced Dissociation)	MS2		11.777	35.3772	10591	L_DC_WT_A.raw	2.99	0	0.0008619
	High	Sequest HT (A11)	Unambiguous	AAPVADERPPAADADEVAAAEGTK		1	1	326498983	326498983	0	3	0.1241	0	1	1	775.009	2323.01	2322.12	384.22	0.2974	177387	CID (Collision Induced Dissociation)	MS2		6.931	35.3291	10572	L_DC_WT_A.raw	2.82	0.000346	0.01441
	High	Sequest HT (A11)	Unambiguous	LAEVATGGEDDGEFDSEK		1	1	326498983	326498983	0	2	0.1498	0	1	1	935.179	1869.35	1868.8	292.92	0.2737	129883	CID (Collision Induced Dissociation)	MS2		27.987	35.3035	10563	L_DC_WT_A.raw	3.27	0.001888	0.03578
High	Master Protein	326528949	Name:"Similar to RAD23 Probable ubiquitin receptor RAD23 (Oryza sativa subsp. japonica OX=39947)"	0	10.478	13.5714	4	6	4	1	420	43.7	5.11	17.06	4
	Confidence	Identifying Node	PSM Ambiguity	Annotated Sequence	Modifications	# Protein Groups	# Proteins	Master Protein Accessions	Protein Accessions	# Missed Cleavages	Charge	DeltaScore	DeltaCn	Rank	Search Engine Rank	m/z [Da]	MH+ [Da]	Theo. MH+ [Da]	DeltaM [ppm]	Deltam/z [Da]	Intensity	Activation Type	MS Order	Isolation Interference [%]	Ion Inject Time [ms]	RT [min]	First Scan	Spectrum File	XCorr	Percolator q-Value	Percolator PEP
	High	Sequest HT (A11)	Unambiguous	AAYNNPERAIDyLySGIPESVEAPPVAR	Y12(Phospho); Y14(Phospho)	1	2	326528949	326501072; 326528949	1	3		0.0469	2	2	1074.6	3221.78	3222.45	-209.18	-0.22469	67581.9	CID (Collision Induced Dissociation)	MS2		12.007	72.0783	24651	L_DC_WT_A.raw	3.25	0.005068	0.07831
	High	Sequest HT (A11)	Unambiguous	AAyNNPERAIDyLYSGIPESVEAPPVAR	Y3(Phospho); Y12(Phospho)	1	2	326528949	326501072; 326528949	1	3	0.0469	0	1	1	1074.6	3221.78	3222.45	-209.18	-0.22469	67581.9	CID (Collision Induced Dissociation)	MS2		12.007	72.0783	24651	L_DC_WT_A.raw	3.41	0.000346	0.009254
	High	Sequest HT (A11)	Unambiguous	AIDYLYSGIPESVEAPPVAR		1	2	326528949	326501072; 326528949	0	2	0.5541	0	1	1	1074.6	2148.19	2147.1	506.47	0.54372	67581.9	CID (Collision Induced Dissociation)	MS2		12.007	72.0783	24651	L_DC_WT_A.raw	4.62	0	3.911e-05
	High	Sequest HT (A11)	Unambiguous	GTSFEIEATPESSVGEVK		1	2	326528949	326501072; 326528949	0	2	0.3549	0	1	1	933.846	1866.68	1866.9	-114	-0.10641	119269	CID (Collision Induced Dissociation)	MS2		26.948	51.2497	16613	L_DC_WT_A.raw	2.93	0.001417	0.03174
	High	Sequest HT (A11)	Unambiguous	GTSFEIEATPESSVGEVK		1	2	326528949	326501072; 326528949	0	2	0.32	0	1	1	934.762	1868.52	1866.9	868.04	0.81027	77683.2	CID (Collision Induced Dissociation)	MS2		26.237	50.7355	16415	L_DC_WT_A.raw	3.75	0	0.002056
	High	Sequest HT (A11)	Unambiguous	LIQENQAEFLR		1	2	326528949	326501072; 326528949	0	2	0.0726	0	1	1	680.257	1359.51	1360.72	-892.55	-0.60725	99778	CID (Collision Induced Dissociation)	MS2		6.417	43.6933	13730	L_DC_WT_A.raw	2.34	0.002904	0.04475
High	Master Protein	326513848	Name:"Similar to BP-73 SAP-like protein BP-73 (Oryza sativa subsp. japonica OX=39947)"	0	7.406	8.95141	3	5	3	1	391	42.4	5.36	16.11	3
	Confidence	Identifying Node	PSM Ambiguity	Annotated Sequence	Modifications	# Protein Groups	# Proteins	Master Protein Accessions	Protein Accessions	# Missed Cleavages	Charge	DeltaScore	DeltaCn	Rank	Search Engine Rank	m/z [Da]	MH+ [Da]	Theo. MH+ [Da]	DeltaM [ppm]	Deltam/z [Da]	Intensity	Activation Type	MS Order	Isolation Interference [%]	Ion Inject Time [ms]	RT [min]	First Scan	Spectrum File	XCorr	Percolator q-Value	Percolator PEP
	High	Sequest HT (A11)	Unambiguous	GSVDSLLNLLR		1	1	326513848	326513848	0	2	0.2589	0	1	1	593.839	1186.67	1186.68	-6.96	-0.00413	60343.4	CID (Collision Induced Dissociation)	MS2		13.573	81.6593	28236	L_DC_WT_A.raw	2.82	0.000346	0.01055
	High	Sequest HT (A11)	Unambiguous	GSVDSLLNLLR		1	1	326513848	326513848	0	2	0.2424	0	1	1	594.006	1187	1186.68	273.94	0.16254	116324	CID (Collision Induced Dissociation)	MS2		7.355	81.4403	28155	L_DC_WT_A.raw	2.31	0.001888	0.03879
	High	Sequest HT (A11)	Unambiguous	DDSENNDEFDSDTVSSK		1	1	326513848	326513848	0	2	0.184	0	1	1	951.929	1902.85	1903.73	-462.2	-0.43995	163323	CID (Collision Induced Dissociation)	MS2		18.859	28.5185	8008	L_DC_WT_A.raw	2.5	0.000346	0.009421
	High	Sequest HT (A11)	Unambiguous	sKPFQERDDSENNDEFDSDTVSSK	S1(Phospho)	1	1	326513848	326513848	1	3	0.0574	0	1	1	952.346	2855.02	2856.15	-393.77	-0.37489	69226.7	CID (Collision Induced Dissociation)	MS2		21.992	27.4691	7607	L_DC_WT_A.raw	3.31	0.001888	0.03896
	High	Sequest HT (A11)	Unambiguous	DDSENNDEFDSDTVSSK		1	1	326513848	326513848	0	2	0.6422	0	1	1	952.346	1903.68	1903.73	-24.45	-0.02328	69226.7	CID (Collision Induced Dissociation)	MS2		21.992	27.4691	7607	L_DC_WT_A.raw	5.17	0	9.552e-05
High	Master Protein	326523019	Name:"Similar to ATS3A Embryo-specific protein ATS3A (Arabidopsis thaliana OX=3702)"	0	2.776	7.00935	1	2	1	1	214	22	8.87	6.5	1
	Confidence	Identifying Node	PSM Ambiguity	Annotated Sequence	Modifications	# Protein Groups	# Proteins	Master Protein Accessions	Protein Accessions	# Missed Cleavages	Charge	DeltaScore	DeltaCn	Rank	Search Engine Rank	m/z [Da]	MH+ [Da]	Theo. MH+ [Da]	DeltaM [ppm]	Deltam/z [Da]	Intensity	Activation Type	MS Order	Isolation Interference [%]	Ion Inject Time [ms]	RT [min]	First Scan	Spectrum File	XCorr	Percolator q-Value	Percolator PEP
	High	Sequest HT (A11)	Unambiguous	VSGVcGYGVcYLYLR	C5(Carbamidomethyl); C10(Carbamidomethyl)	1	2	326523019	326497141; 326523019	0	2	0.3738	0	1	1	883.095	1765.18	1765.84	-372.67	-0.32904	69269.2	CID (Collision Induced Dissociation)	MS2		17.254	66.2652	22423	L_DC_WT_A.raw	3.05	0.0008975	0.02212
	High	Sequest HT (A11)	Unambiguous	VsGVCGYGVcYLYLR	S2(Phospho); C10(Carbamidomethyl)	1	2	326523019	326497141; 326523019	0	2	0.2174	0	1	1	895.428	1789.85	1788.78	594.93	0.5321	82272.9	CID (Collision Induced Dissociation)	MS2		30.319	78.2867	26987	L_DC_WT_A.raw	3.45	0.004918	0.07565
High	Master Protein	326509643	Name:"Similar to LPXC5 Probable UDP-3-O-acyl-N-acetylglucosamine deacetylase 5, mitochondrial (Arabidopsis thaliana OX=3702)"	0.001	1.889	3.08642	1	2	1	1	324	34.3	6	4.61	1
	Confidence	Identifying Node	PSM Ambiguity	Annotated Sequence	Modifications	# Protein Groups	# Proteins	Master Protein Accessions	Protein Accessions	# Missed Cleavages	Charge	DeltaScore	DeltaCn	Rank	Search Engine Rank	m/z [Da]	MH+ [Da]	Theo. MH+ [Da]	DeltaM [ppm]	Deltam/z [Da]	Intensity	Activation Type	MS Order	Isolation Interference [%]	Ion Inject Time [ms]	RT [min]	First Scan	Spectrum File	XCorr	Percolator q-Value	Percolator PEP
	High	Sequest HT (A11)	Unambiguous	MStAAAAAAR	T3(Phospho)	1	1	326509643	326509643	0	2	0.0677	0	1	1	500.171	999.334	1000.43	-1093.89	-0.54718	105698	CID (Collision Induced Dissociation)	MS2		12.205	33.643	9940	L_DC_WT_A.raw	2.51	0.000346	0.01291
	High	Sequest HT (A11)	Selected	MStAAAAAAR	T3(Phospho)	1	1	326509643	326509643	0	2	0	0	1	1	501.421	1001.83	1000.43	1405.09	0.70285	165119	CID (Collision Induced Dissociation)	MS2		8.543	33.16	9758	L_DC_WT_A.raw	2.1	0.000346	0.0133

## Sheet: SHOOT_WT_replicate 2
Protein FDR Confidence	Master	Accession	Description	Exp. q-value	Sum PEP Score	Coverage	# Peptides	# PSMs	# Unique Peptides	# Protein Groups	# AAs	MW [kDa]	calc. pI	Score Sequest HT	# Peptides Sequest HT
High	Master Protein	326526529	Name:"Protein of unknown function"	0	54.276	53.8153	12	33	12	1	249	28.3	6.65	107.35	12
	Confidence	Identifying Node	PSM Ambiguity	Annotated Sequence	Modifications	# Protein Groups	# Proteins	Master Protein Accessions	Protein Accessions	# Missed Cleavages	Charge	DeltaScore	DeltaCn	Rank	Search Engine Rank	m/z [Da]	MH+ [Da]	Theo. MH+ [Da]	DeltaM [ppm]	Deltam/z [Da]	Intensity	Activation Type	MS Order	Isolation Interference [%]	Ion Inject Time [ms]	RT [min]	First Scan	Spectrum File	XCorr	Percolator q-Value	Percolator PEP
	High	Sequest HT (A11)	Unambiguous	ASNQEEAVAFMEDVR		1	1	326526529	326526529	0	2	0.1958	0	1	1	849.427	1697.85	1695.76	1228.38	1.04152	102183	CID (Collision Induced Dissociation)	MS2		8.359	63.4072	21245	L_DC_WT_B.raw	2.86	0.002646	0.05952
	High	Sequest HT (A11)	Unambiguous	VIPETDAGLVEFFLDTDAR		1	1	326526529	326526529	0	3	0.2463	0	1	1	703.758	2109.26	2108.05	571.26	0.40142	62652.5	CID (Collision Induced Dissociation)	MS2		24.128	94.9221	32746	L_DC_WT_B.raw	3.37	0	0.001519
	High	Sequest HT (A11)	Unambiguous	VIPETDAGLVEFFLDTDAR		1	1	326526529	326526529	0	2	0.559	0	1	1	1055.1	2109.19	2108.05	537.92	0.56699	40891	CID (Collision Induced Dissociation)	MS2		27.327	94.7152	32675	L_DC_WT_B.raw	4.49	0	5.615e-06
	High	Sequest HT (A11)	Unambiguous	NELNMSILTLLDENIGSAK		1	1	326526529	326526529	0	2	0.3715	0	1	1	1038.51	2076.02	2075.07	458.97	0.4762	32973.5	CID (Collision Induced Dissociation)	MS2		37.388	93.8826	32382	L_DC_WT_B.raw	3.93	0	1.465e-05
	High	Sequest HT (A11)	Unambiguous	NELNMSILTLLDENIGSAK		1	1	326526529	326526529	0	3	0.0707	0	1	1	693.174	2077.51	2075.07	1175.56	0.81312	43634.5	CID (Collision Induced Dissociation)	MS2		39.048	93.8483	32370	L_DC_WT_B.raw	3.11	0	0.01079
	High	Sequest HT (A11)	Unambiguous	VIPETDAGLVEFFLDTDAR		1	1	326526529	326526529	0	2	0.0824	0	1	1	1056.01	2111.02	2108.05	1407.62	1.48367	52519.7	CID (Collision Induced Dissociation)	MS2		50	93.7427	32333	L_DC_WT_B.raw	2.67	0	0.0001972
	High	Sequest HT (A11)	Unambiguous	VIPETDAGLVEFFLDTDAR		1	1	326526529	326526529	0	3	0.3148	0	1	1	703.674	2109.01	2108.05	452.67	0.31808	94423.3	CID (Collision Induced Dissociation)	MS2		18.24	93.3811	32204	L_DC_WT_B.raw	3.78	0	0.001041
	High	Sequest HT (A11)	Unambiguous	VIPETDAGLVEFFLDTDAR		1	1	326526529	326526529	0	2	0.2203	0	1	1	1054.35	2107.69	2108.05	-173.65	-0.18303	27371.3	CID (Collision Induced Dissociation)	MS2		32.437	93.1497	32124	L_DC_WT_B.raw	3.45	0	0.0001871
	High	Sequest HT (A11)	Unambiguous	NELNMSILTLLDENIGSAK		1	1	326526529	326526529	0	2	0.6345	0	1	1	1037.85	2074.69	2075.07	-183.59	-0.19048	49178.9	CID (Collision Induced Dissociation)	MS2		37.254	92.2148	31792	L_DC_WT_B.raw	5.5	0	2.228e-07
	High	Sequest HT (A11)	Unambiguous	NELNMSILTLLDENIGSAK		1	1	326526529	326526529	0	3	0.2194	0	1	1	692.924	2076.76	2075.07	814.12	0.56312	42823.4	CID (Collision Induced Dissociation)	MS2		30.705	91.9659	31704	L_DC_WT_B.raw	2.78	0	0.01003
	High	Sequest HT (A11)	Unambiguous	NELNmSILTLLDENIGSAK	M5(Oxidation)	1	1	326526529	326526529	0	2	0.4532	0	1	1	1046.26	2091.52	2091.06	218.92	0.22889	47820.9	CID (Collision Induced Dissociation)	MS2		44.49	87.8623	30264	L_DC_WT_B.raw	4.7	0	1.406e-05
	High	Sequest HT (A11)	Unambiguous	NELNmSILTLLDENIGSAK	M5(Oxidation)	1	1	326526529	326526529	0	2	0.1943	0	1	1	1047.1	2093.19	2091.06	1015.98	1.06224	51796.9	CID (Collision Induced Dissociation)	MS2		19.272	87.8191	30249	L_DC_WT_B.raw	2.83	0	1.297e-05
	High	Sequest HT (A11)	Selected	RAVANKIscIGWDPEGILAPPQPGHIAR	S8(Phospho); C9(Carbamidomethyl)	1	1	326526529	326526529	2	3	0.0124	0	1	1	1034.43	3101.28	3103.57	-737.18	-0.76262	62701.5	CID (Collision Induced Dissociation)	MS2		18.268	83.2308	28611	L_DC_WT_B.raw	3.23	0.001485	0.03519
	High	Sequest HT (A11)	Unambiguous	tLLDMVERNELNMSILTLLDENIGSAK	T1(Phospho)	1	1	326526529	326526529	1	3	0.2231	0	1	1	1037.85	3111.53	3112.53	-322.03	-0.33411	49178.9	CID (Collision Induced Dissociation)	MS2		37.254	92.2148	31792	L_DC_WT_B.raw	3.63	0.0002813	0.01265
	High	Sequest HT (A11)	Unambiguous	VIGEGVEAYDKLQNDLVTAK		1	1	326526529	326526529	1	3	0.1125	0	1	1	721.341	2162.01	2162.13	-57.37	-0.04135	166887	CID (Collision Induced Dissociation)	MS2		6.595	60.1169	19985	L_DC_WT_B.raw	2.4	0.002646	0.05617
	High	Sequest HT (A11)	Unambiguous	ASNQEEAVAFMEDVR		1	1	326526529	326526529	0	2	0.4865	0	1	1	847.844	1694.68	1695.76	-639.06	-0.54185	170084	CID (Collision Induced Dissociation)	MS2		11.342	59.3358	19686	L_DC_WT_B.raw	4.46	0	0.0007257
	High	Sequest HT (A11)	Unambiguous	ASNQEEAVAFMEDVR		1	1	326526529	326526529	0	3	0.0669	0	1	1	566.088	1696.25	1695.76	286.96	0.1622	84890.9	CID (Collision Induced Dissociation)	MS2		18.191	59.2069	19636	L_DC_WT_B.raw	2.39	0	0.01206
	High	Sequest HT (A11)	Unambiguous	TLLDmVER	M5(Oxidation)	1	1	326526529	326526529	0	2	0.3417	0	1	1	497.337	993.667	992.508	1167.66	0.57946	133381	CID (Collision Induced Dissociation)	MS2		6.275	38.3673	11705	L_DC_WT_B.raw	1.99	0.001896	0.04203
	High	Sequest HT (A11)	Unambiguous	AAFDLQVK		1	1	326526529	326526529	0	2	0.383	0	1	1	446.753	892.498	891.493	1127.27	0.50248	296432	CID (Collision Induced Dissociation)	MS2		2.461	37.6955	11450	L_DC_WT_B.raw	2.82	0.001258	0.03205
	High	Sequest HT (A11)	Unambiguous	LIELEAmQK	M7(Oxidation)	1	1	326526529	326526529	0	2	0.2884	0	1	1	546.421	1091.84	1090.58	1150.14	0.62716	159632	CID (Collision Induced Dissociation)	MS2		3.059	29.9461	8535	L_DC_WT_B.raw	2.67	0.0002813	0.01327
	High	Sequest HT (A11)	Selected	TLLDmVER	M5(Oxidation)	1	1	326526529	326526529	0	2		0.0134	2	2	496.754	992.5	992.508	-7.83	-0.00389	198832	CID (Collision Induced Dissociation)	MS2		4.012	38.4114	11722	L_DC_WT_B.raw	1.47	0.005943	0.1045
	High	Sequest HT (A11)	Unambiguous	LTNILQSK		1	1	326526529	326526529	0	2	0.1655	0	1	1	459.336	917.666	916.546	1221.27	0.55967	410854	CID (Collision Induced Dissociation)	MS2		2.454	29.0015	8176	L_DC_WT_B.raw	2.9	0.0007882	0.02464
	High	Sequest HT (A11)	Unambiguous	VIGEGVEAYDK		1	1	326526529	326526529	0	2	0.3648	0	1	1	590.256	1179.5	1179.59	-72.27	-0.04262	542668	CID (Collision Induced Dissociation)	MS2		4.047	28.4265	7958	L_DC_WT_B.raw	3.81	0	0.0003537
	High	Sequest HT (A11)	Unambiguous	VIGEGVEAYDK		1	1	326526529	326526529	0	2	0.2532	0	1	1	591.339	1181.67	1179.59	1764.57	1.04073	152501	CID (Collision Induced Dissociation)	MS2		3.331	28.2673	7899	L_DC_WT_B.raw	3.08	0	0.002627
	High	Sequest HT (A11)	Selected	LQNDLVTAK		1	1	326526529	326526529	0	2		0.0181	2	2	501.671	1002.33	1001.56	770.07	0.38564	207190	CID (Collision Induced Dissociation)	MS2		4.226	21.9541	5546	L_DC_WT_B.raw	2.17	0.002096	0.04549
	High	Sequest HT (A11)	Unambiguous	VIGEGVEAYDK		1	1	326526529	326526529	0	2	0.2621	0	1	1	589.589	1178.17	1179.59	-1202.62	-0.7093	84459.5	CID (Collision Induced Dissociation)	MS2		12.79	29.4708	8358	L_DC_WT_B.raw	2.48	0	0.003712
	High	Sequest HT (A11)	Unambiguous	ASNQEEAVAFmEDVR	M11(Oxidation)	1	1	326526529	326526529	0	2	0.2693	0	1	1	856.677	1712.35	1711.76	343.74	0.2942	49687.6	CID (Collision Induced Dissociation)	MS2		40.439	39.5101	12131	L_DC_WT_B.raw	3.49	0	0.005177
	High	Sequest HT (A11)	Unambiguous	VIGEGVEAYDKLQNDLVTAK		1	1	326526529	326526529	1	2	0.4959	0	1	1	1081.85	2162.69	2162.13	257.01	0.27785	207861	CID (Collision Induced Dissociation)	MS2		23.512	58.9282	19529	L_DC_WT_B.raw	4.88	0	0.000393
	High	Sequest HT (A11)	Unambiguous	VIGEGVEAYDKLQNDLVTAK		1	1	326526529	326526529	1	3	0.4339	0	1	1	721.841	2163.51	2162.13	636.4	0.45866	85370	CID (Collision Induced Dissociation)	MS2		10.483	58.8575	19501	L_DC_WT_B.raw	4.01	0	0.0005564
	High	Sequest HT (A11)	Unambiguous	ASNQEEAVAFMEDVR		1	1	326526529	326526529	0	2	0.4125	0	1	1	848.427	1695.85	1695.76	48.94	0.0415	471330	CID (Collision Induced Dissociation)	MS2		3.851	58.236	19262	L_DC_WT_B.raw	4.63	0	9.988e-05
	High	Sequest HT (A11)	Unambiguous	ASNQEEAVAFMEDVR		1	1	326526529	326526529	0	2	0.259	0	1	1	849.427	1697.85	1695.76	1228.38	1.04152	282400	CID (Collision Induced Dissociation)	MS2		3.219	58.1956	19247	L_DC_WT_B.raw	3.63	0	0.0001532
	High	Sequest HT (A11)	Unambiguous	LIELEAMQK		1	1	326526529	326526529	0	2	0.299	0	1	1	537.755	1074.5	1074.59	-78.58	-0.04222	719425	CID (Collision Induced Dissociation)	MS2		2.18	42.3653	13196	L_DC_WT_B.raw	3.11	0.0002813	0.0149
	High	Sequest HT (A11)	Unambiguous	TLLDMVER		1	1	326526529	326526529	0	2	0.3223	0	1	1	488.754	976.5	976.513	-13.48	-0.00658	171543	CID (Collision Induced Dissociation)	MS2		3.287	53.5115	17428	L_DC_WT_B.raw	2.11	0.002303	0.04881
High	Master Protein	263935	CW21=non-specific lipid transfer protein [barley, cv. Bomi, leaves, Peptide, 90 aa]	0	25.954	47.7778	2	22	1	1	90	8.7	9.04	72.37	2
	Confidence	Identifying Node	PSM Ambiguity	Annotated Sequence	Modifications	# Protein Groups	# Proteins	Master Protein Accessions	Protein Accessions	# Missed Cleavages	Charge	DeltaScore	DeltaCn	Rank	Search Engine Rank	m/z [Da]	MH+ [Da]	Theo. MH+ [Da]	DeltaM [ppm]	Deltam/z [Da]	Intensity	Activation Type	MS Order	Isolation Interference [%]	Ion Inject Time [ms]	RT [min]	First Scan	Spectrum File	XCorr	Percolator q-Value	Percolator PEP
	High	Sequest HT (A11)	Unambiguous	AAGIPSmcGVSVPYAISASVDcSK	M7(Oxidation); C8(Carbamidomethyl); C22(Carbamidomethyl)	2	7	1480926; 263935	1098265; 1480926; 2497744; 1027485280; 587446; 443799; 263935	0	3	0.1051	0	1	1	816.01	2446.02	2443.13	1180.94	0.96173	193161	CID (Collision Induced Dissociation)	MS2		3.413	63.074	21116	L_DC_WT_B.raw	3.14	0	0.007007
	High	Sequest HT (A11)	Unambiguous	AAGIPSmcGVSVPYAISASVDcSK	M7(Oxidation); C8(Carbamidomethyl); C22(Carbamidomethyl)	2	7	1480926; 263935	1098265; 1480926; 2497744; 1027485280; 587446; 443799; 263935	0	2	0.1467	0	1	1	1221.93	2442.86	2443.13	-109.89	-0.13424	107664	CID (Collision Induced Dissociation)	MS2		9.324	64.0216	21481	L_DC_WT_B.raw	2.25	0.008246	0.1414
	High	Sequest HT (A11)	Unambiguous	AAGIPSmcGVSVPYAISASVDcSK	M7(Oxidation); C8(Carbamidomethyl); C22(Carbamidomethyl)	2	7	1480926; 263935	1098265; 1480926; 2497744; 1027485280; 587446; 443799; 263935	0	3	0.2642	0	1	1	815.093	2443.27	2443.13	55.31	0.04505	95461.5	CID (Collision Induced Dissociation)	MS2		19.804	64.2119	21555	L_DC_WT_B.raw	3.52	0	0.009188
	High	Sequest HT (A11)	Unambiguous	AAGIPSMcGVSVPYAISASVDcSK	C8(Carbamidomethyl); C22(Carbamidomethyl)	2	7	1480926; 263935	1098265; 1480926; 2497744; 1027485280; 587446; 443799; 263935	0	2	0.4427	0	1	1	1215.1	2429.19	2427.14	848.54	1.02976	103412	CID (Collision Induced Dissociation)	MS2		13.176	72.7843	24792	L_DC_WT_B.raw	3.93	0	4.162e-05
	High	Sequest HT (A11)	Unambiguous	AAGIPSMcGVSVPYAISASVDcSK	C8(Carbamidomethyl); C22(Carbamidomethyl)	2	7	1480926; 263935	1098265; 1480926; 2497744; 1027485280; 587446; 443799; 263935	0	2	0.5444	0	1	1	1214.1	2427.19	2427.14	24.5	0.02974	126414	CID (Collision Induced Dissociation)	MS2		9.355	72.8725	24825	L_DC_WT_B.raw	3.6	0	9.309e-05
	High	Sequest HT (A11)	Unambiguous	AAGIPSMCGVsVPYAISASVDcSK	S11(Phospho); C22(Carbamidomethyl)	2	7	1480926; 263935	1098265; 1480926; 2497744; 1027485280; 587446; 443799; 263935	0	3	0.1551	0	1	1	817.427	2450.27	2450.08	75.64	0.06177	59536.4	CID (Collision Induced Dissociation)	MS2		13.564	73.1497	24929	L_DC_WT_B.raw	3.03	0	0.006478
	High	Sequest HT (A11)	Unambiguous	AAGIPSMcGVSVPYAISASVDcSK	C8(Carbamidomethyl); C22(Carbamidomethyl)	2	7	1480926; 263935	1098265; 1480926; 2497744; 1027485280; 587446; 443799; 263935	0	3	0.4346	0	1	1	810.343	2429.02	2427.14	774.49	0.62659	280469	CID (Collision Induced Dissociation)	MS2		2.608	73.8382	25184	L_DC_WT_B.raw	4.97	0	5.361e-05
	High	Sequest HT (A11)	Unambiguous	AAGIPSMcGVSVPYAISASVDcSK	C8(Carbamidomethyl); C22(Carbamidomethyl)	2	7	1480926; 263935	1098265; 1480926; 2497744; 1027485280; 587446; 443799; 263935	0	3	0.4794	0	1	1	809.76	2427.27	2427.14	53.46	0.04325	279275	CID (Collision Induced Dissociation)	MS2		3.077	73.8406	25185	L_DC_WT_B.raw	4.36	0	4.296e-05
	High	Sequest HT (A11)	Unambiguous	AAGIPSMcGVSVPYAISASVDcSK	C8(Carbamidomethyl); C22(Carbamidomethyl)	2	7	1480926; 263935	1098265; 1480926; 2497744; 1027485280; 587446; 443799; 263935	0	2	0.3042	0	1	1	1213.35	2425.69	2427.14	-593.52	-0.72028	82827.4	CID (Collision Induced Dissociation)	MS2		24.657	74.5509	25452	L_DC_WT_B.raw	2.63	0.0002813	0.0135
	High	Sequest HT (A11)	Selected	AAGIPSMcGVSVPYAISASVDcSK	C8(Carbamidomethyl); C22(Carbamidomethyl)	2	7	1480926; 263935	1098265; 1480926; 2497744; 1027485280; 587446; 443799; 263935	0	3	0.0068	0	1	1	810.427	2429.27	2427.14	877.49	0.70993	104134	CID (Collision Induced Dissociation)	MS2		13.226	75.4886	25800	L_DC_WT_B.raw	2.94	0.006119	0.1062
	High	Sequest HT (A11)	Unambiguous	AAGIPSMcGVSVPYAISASVDcSK	C8(Carbamidomethyl); C22(Carbamidomethyl)	2	7	1480926; 263935	1098265; 1480926; 2497744; 1027485280; 587446; 443799; 263935	0	2	0.363	0	1	1	1214.85	2428.69	2427.14	642.53	0.77975	84261.3	CID (Collision Induced Dissociation)	MS2		17.868	77.1194	26404	L_DC_WT_B.raw	2.92	0	0.005217
	High	Sequest HT (A11)	Unambiguous	AAGIPSMcGVSVPYAISASVDcSK	C8(Carbamidomethyl); C22(Carbamidomethyl)	2	7	1480926; 263935	1098265; 1480926; 2497744; 1027485280; 587446; 443799; 263935	0	2	0.2774	0	1	1	1214.1	2427.19	2427.14	24.5	0.02974	57274.4	CID (Collision Induced Dissociation)	MS2		33.809	77.319	26478	L_DC_WT_B.raw	2.92	0	0.007187
	High	Sequest HT (A11)	Unambiguous	AAGIPSmcGVSVPYAISASVDcSK	M7(Oxidation); C8(Carbamidomethyl); C22(Carbamidomethyl)	2	7	1480926; 263935	1098265; 1480926; 2497744; 1027485280; 587446; 443799; 263935	0	2	0.4367	0	1	1	1221.85	2442.7	2443.13	-178.11	-0.21757	364909	CID (Collision Induced Dissociation)	MS2		15.433	62.4172	20867	L_DC_WT_B.raw	3.16	0	0.0005359
	High	Sequest HT (A11)	Unambiguous	AIScGQVSSALSPcISYAR	C4(Carbamidomethyl); C14(Carbamidomethyl)	1	1	263935	263935	0	2	0.2921	0	1	1	1014.51	2028.02	2026.97	518.95	0.52595	111096	CID (Collision Induced Dissociation)	MS2		11.555	58.7279	19452	L_DC_WT_B.raw	2.67	0	0.01067
	High	Sequest HT (A11)	Unambiguous	AIScGQVSSALSPcISYAR	C4(Carbamidomethyl); C14(Carbamidomethyl)	1	1	263935	263935	0	2	0.1797	0	1	1	1014.51	2028.02	2026.97	518.95	0.52595	100147	CID (Collision Induced Dissociation)	MS2		18.321	57.3149	18907	L_DC_WT_B.raw	2.56	0.0002813	0.01815
	High	Sequest HT (A11)	Unambiguous	AIScGQVSSALSPcISYAR	C4(Carbamidomethyl); C14(Carbamidomethyl)	1	1	263935	263935	0	2	0.3849	0	1	1	1013.93	2026.85	2026.97	-56.64	-0.0574	115336	CID (Collision Induced Dissociation)	MS2		21.4	55.8969	18358	L_DC_WT_B.raw	3.17	0	0.003557
	High	Sequest HT (A11)	Unambiguous	AIScGQVSSALSPcISYAR	C4(Carbamidomethyl); C14(Carbamidomethyl)	1	1	263935	263935	0	3	0.0916	0	1	1	676.007	2026.01	2026.97	-474.21	-0.3204	88422.6	CID (Collision Induced Dissociation)	MS2		12.095	54.5649	17838	L_DC_WT_B.raw	2.73	0.0007882	0.02464
	High	Sequest HT (A11)	Unambiguous	AIScGQVSSALSPcISYAR	C4(Carbamidomethyl); C14(Carbamidomethyl)	1	1	263935	263935	0	3	0.418	0	1	1	676.757	2028.26	2026.97	635.84	0.42961	145809	CID (Collision Induced Dissociation)	MS2		5.611	54.0698	17645	L_DC_WT_B.raw	4.33	0	4.612e-05
	High	Sequest HT (A11)	Unambiguous	AIScGQVSSALSPcISYAR	C4(Carbamidomethyl); C14(Carbamidomethyl)	1	1	263935	263935	0	2	0.491	0	1	1	1013.93	2026.85	2026.97	-56.64	-0.0574	756039	CID (Collision Induced Dissociation)	MS2		1.752	53.8753	17570	L_DC_WT_B.raw	3.89	0	0.0001688
	High	Sequest HT (A11)	Unambiguous	AIScGQVSSALSPcISYAR	C4(Carbamidomethyl); C14(Carbamidomethyl)	1	1	263935	263935	0	3	0.2063	0	1	1	676.424	2027.26	2026.97	142.49	0.09627	162306	CID (Collision Induced Dissociation)	MS2		3.035	52.6307	17085	L_DC_WT_B.raw	2.52	0	0.009973
	High	Sequest HT (A11)	Unambiguous	AIScGQVSSALSPcISYAR	C4(Carbamidomethyl); C14(Carbamidomethyl)	1	1	263935	263935	0	2	0.5592	0	1	1	1014.01	2027.02	2026.97	25.59	0.02594	172667	CID (Collision Induced Dissociation)	MS2		8.954	52.5038	17036	L_DC_WT_B.raw	4.31	0	5.539e-06
	High	Sequest HT (A11)	Unambiguous	AIScGQVSSALSPcISYAR	C4(Carbamidomethyl); C14(Carbamidomethyl)	1	1	263935	263935	0	2	0.2286	0	1	1	1014.93	2028.85	2026.97	930.08	0.94262	172841	CID (Collision Induced Dissociation)	MS2		7.355	55.315	18130	L_DC_WT_B.raw	2.8	0	0.001046
High	Master Protein	1480926	lipid transfer protein [Hordeum vulgare subsp. vulgare]	0	17.668	33.913	2	14	1	1	115	11.2	9.04	45.65	2
	Confidence	Identifying Node	PSM Ambiguity	Annotated Sequence	Modifications	# Protein Groups	# Proteins	Master Protein Accessions	Protein Accessions	# Missed Cleavages	Charge	DeltaScore	DeltaCn	Rank	Search Engine Rank	m/z [Da]	MH+ [Da]	Theo. MH+ [Da]	DeltaM [ppm]	Deltam/z [Da]	Intensity	Activation Type	MS Order	Isolation Interference [%]	Ion Inject Time [ms]	RT [min]	First Scan	Spectrum File	XCorr	Percolator q-Value	Percolator PEP
	High	Sequest HT (A11)	Unambiguous	GNGAKPPVAccSGVK	C10(Carbamidomethyl); C11(Carbamidomethyl)	1	3	1480926	510528; 1480926; 2497744	0	3	0.0529	0	1	1	501.921	1503.75	1501.72	1346.56	0.67406	45324.6	CID (Collision Induced Dissociation)	MS2		21.639	14.6091	3062	L_DC_WT_B.raw	2.27	0.002487	0.04934
	High	Sequest HT (A11)	Unambiguous	AAGIPSmcGVSVPYAISASVDcSK	M7(Oxidation); C8(Carbamidomethyl); C22(Carbamidomethyl)	2	7	1480926; 263935	1098265; 1480926; 2497744; 1027485280; 587446; 443799; 263935	0	3	0.1051	0	1	1	816.01	2446.02	2443.13	1180.94	0.96173	193161	CID (Collision Induced Dissociation)	MS2		3.413	63.074	21116	L_DC_WT_B.raw	3.14	0	0.007007
	High	Sequest HT (A11)	Unambiguous	AAGIPSmcGVSVPYAISASVDcSK	M7(Oxidation); C8(Carbamidomethyl); C22(Carbamidomethyl)	2	7	1480926; 263935	1098265; 1480926; 2497744; 1027485280; 587446; 443799; 263935	0	2	0.1467	0	1	1	1221.93	2442.86	2443.13	-109.89	-0.13424	107664	CID (Collision Induced Dissociation)	MS2		9.324	64.0216	21481	L_DC_WT_B.raw	2.25	0.008246	0.1414
	High	Sequest HT (A11)	Unambiguous	AAGIPSmcGVSVPYAISASVDcSK	M7(Oxidation); C8(Carbamidomethyl); C22(Carbamidomethyl)	2	7	1480926; 263935	1098265; 1480926; 2497744; 1027485280; 587446; 443799; 263935	0	3	0.2642	0	1	1	815.093	2443.27	2443.13	55.31	0.04505	95461.5	CID (Collision Induced Dissociation)	MS2		19.804	64.2119	21555	L_DC_WT_B.raw	3.52	0	0.009188
	High	Sequest HT (A11)	Unambiguous	AAGIPSMcGVSVPYAISASVDcSK	C8(Carbamidomethyl); C22(Carbamidomethyl)	2	7	1480926; 263935	1098265; 1480926; 2497744; 1027485280; 587446; 443799; 263935	0	2	0.4427	0	1	1	1215.1	2429.19	2427.14	848.54	1.02976	103412	CID (Collision Induced Dissociation)	MS2		13.176	72.7843	24792	L_DC_WT_B.raw	3.93	0	4.162e-05
	High	Sequest HT (A11)	Unambiguous	AAGIPSMcGVSVPYAISASVDcSK	C8(Carbamidomethyl); C22(Carbamidomethyl)	2	7	1480926; 263935	1098265; 1480926; 2497744; 1027485280; 587446; 443799; 263935	0	2	0.5444	0	1	1	1214.1	2427.19	2427.14	24.5	0.02974	126414	CID (Collision Induced Dissociation)	MS2		9.355	72.8725	24825	L_DC_WT_B.raw	3.6	0	9.309e-05
	High	Sequest HT (A11)	Unambiguous	AAGIPSMCGVsVPYAISASVDcSK	S11(Phospho); C22(Carbamidomethyl)	2	7	1480926; 263935	1098265; 1480926; 2497744; 1027485280; 587446; 443799; 263935	0	3	0.1551	0	1	1	817.427	2450.27	2450.08	75.64	0.06177	59536.4	CID (Collision Induced Dissociation)	MS2		13.564	73.1497	24929	L_DC_WT_B.raw	3.03	0	0.006478
	High	Sequest HT (A11)	Unambiguous	AAGIPSMcGVSVPYAISASVDcSK	C8(Carbamidomethyl); C22(Carbamidomethyl)	2	7	1480926; 263935	1098265; 1480926; 2497744; 1027485280; 587446; 443799; 263935	0	3	0.4346	0	1	1	810.343	2429.02	2427.14	774.49	0.62659	280469	CID (Collision Induced Dissociation)	MS2		2.608	73.8382	25184	L_DC_WT_B.raw	4.97	0	5.361e-05
	High	Sequest HT (A11)	Unambiguous	AAGIPSMcGVSVPYAISASVDcSK	C8(Carbamidomethyl); C22(Carbamidomethyl)	2	7	1480926; 263935	1098265; 1480926; 2497744; 1027485280; 587446; 443799; 263935	0	3	0.4794	0	1	1	809.76	2427.27	2427.14	53.46	0.04325	279275	CID (Collision Induced Dissociation)	MS2		3.077	73.8406	25185	L_DC_WT_B.raw	4.36	0	4.296e-05
	High	Sequest HT (A11)	Unambiguous	AAGIPSMcGVSVPYAISASVDcSK	C8(Carbamidomethyl); C22(Carbamidomethyl)	2	7	1480926; 263935	1098265; 1480926; 2497744; 1027485280; 587446; 443799; 263935	0	2	0.3042	0	1	1	1213.35	2425.69	2427.14	-593.52	-0.72028	82827.4	CID (Collision Induced Dissociation)	MS2		24.657	74.5509	25452	L_DC_WT_B.raw	2.63	0.0002813	0.0135
	High	Sequest HT (A11)	Selected	AAGIPSMcGVSVPYAISASVDcSK	C8(Carbamidomethyl); C22(Carbamidomethyl)	2	7	1480926; 263935	1098265; 1480926; 2497744; 1027485280; 587446; 443799; 263935	0	3	0.0068	0	1	1	810.427	2429.27	2427.14	877.49	0.70993	104134	CID (Collision Induced Dissociation)	MS2		13.226	75.4886	25800	L_DC_WT_B.raw	2.94	0.006119	0.1062
	High	Sequest HT (A11)	Unambiguous	AAGIPSMcGVSVPYAISASVDcSK	C8(Carbamidomethyl); C22(Carbamidomethyl)	2	7	1480926; 263935	1098265; 1480926; 2497744; 1027485280; 587446; 443799; 263935	0	2	0.363	0	1	1	1214.85	2428.69	2427.14	642.53	0.77975	84261.3	CID (Collision Induced Dissociation)	MS2		17.868	77.1194	26404	L_DC_WT_B.raw	2.92	0	0.005217
	High	Sequest HT (A11)	Unambiguous	AAGIPSMcGVSVPYAISASVDcSK	C8(Carbamidomethyl); C22(Carbamidomethyl)	2	7	1480926; 263935	1098265; 1480926; 2497744; 1027485280; 587446; 443799; 263935	0	2	0.2774	0	1	1	1214.1	2427.19	2427.14	24.5	0.02974	57274.4	CID (Collision Induced Dissociation)	MS2		33.809	77.319	26478	L_DC_WT_B.raw	2.92	0	0.007187
	High	Sequest HT (A11)	Unambiguous	AAGIPSmcGVSVPYAISASVDcSK	M7(Oxidation); C8(Carbamidomethyl); C22(Carbamidomethyl)	2	7	1480926; 263935	1098265; 1480926; 2497744; 1027485280; 587446; 443799; 263935	0	2	0.4367	0	1	1	1221.85	2442.7	2443.13	-178.11	-0.21757	364909	CID (Collision Induced Dissociation)	MS2		15.433	62.4172	20867	L_DC_WT_B.raw	3.16	0	0.0005359
High	Master Protein	326513848	Name:"Similar to BP-73 SAP-like protein BP-73 (Oryza sativa subsp. japonica OX=39947)"	0	8.094	8.95141	3	4	3	1	391	42.4	5.36	13.34	3
	Confidence	Identifying Node	PSM Ambiguity	Annotated Sequence	Modifications	# Protein Groups	# Proteins	Master Protein Accessions	Protein Accessions	# Missed Cleavages	Charge	DeltaScore	DeltaCn	Rank	Search Engine Rank	m/z [Da]	MH+ [Da]	Theo. MH+ [Da]	DeltaM [ppm]	Deltam/z [Da]	Intensity	Activation Type	MS Order	Isolation Interference [%]	Ion Inject Time [ms]	RT [min]	First Scan	Spectrum File	XCorr	Percolator q-Value	Percolator PEP
	High	Sequest HT (A11)	Unambiguous	GSVDSLLNLLR		1	1	326513848	326513848	0	2	0.2587	0	1	1	594.422	1187.84	1186.68	976.2	0.57922	57452.6	CID (Collision Induced Dissociation)	MS2		10.345	81.0011	27816	L_DC_WT_B.raw	2.59	0.001485	0.03572
	High	Sequest HT (A11)	Unambiguous	GSVDSLLNLLR		1	1	326513848	326513848	0	2	0.2589	0	1	1	593.589	1186.17	1186.68	-428.31	-0.25413	78585.5	CID (Collision Induced Dissociation)	MS2		15.003	81.3017	27925	L_DC_WT_B.raw	2.82	0	0.007241
	High	Sequest HT (A11)	Unambiguous	SKPFQERDDsENNDEFDSDTVSSK	S10(Phospho)	1	1	326513848	326513848	1	3	0.0857	0	1	1	952.846	2856.52	2856.15	131.42	0.12512	112717	CID (Collision Induced Dissociation)	MS2		32.661	27.6094	7647	L_DC_WT_B.raw	3.15	0.002096	0.04404
	High	Sequest HT (A11)	Unambiguous	DDSENNDEFDSDTVSSK		1	1	326513848	326513848	0	2	0.6297	0	1	1	952.846	1904.68	1903.73	500.84	0.47673	112717	CID (Collision Induced Dissociation)	MS2		32.661	27.6094	7647	L_DC_WT_B.raw	4.78	0	2.524e-05
High	Master Protein	326504586	Name:"Similar to PHOS32 Universal stress protein PHOS32 (Arabidopsis thaliana OX=3702)"	0	7.695	15.0943	3	3	3	1	265	27.9	5.26	9.09	3
	Confidence	Identifying Node	PSM Ambiguity	Annotated Sequence	Modifications	# Protein Groups	# Proteins	Master Protein Accessions	Protein Accessions	# Missed Cleavages	Charge	DeltaScore	DeltaCn	Rank	Search Engine Rank	m/z [Da]	MH+ [Da]	Theo. MH+ [Da]	DeltaM [ppm]	Deltam/z [Da]	Intensity	Activation Type	MS Order	Isolation Interference [%]	Ion Inject Time [ms]	RT [min]	First Scan	Spectrum File	XCorr	Percolator q-Value	Percolator PEP
	High	Sequest HT (A11)	Unambiguous	SQDLAQPLVAAQIPFK		1	1	326504586	326504586	0	2	0.3842	0	1	1	863.428	1725.85	1725.95	-61.15	-0.05277	63262.5	CID (Collision Induced Dissociation)	MS2		30.89	68.5702	23212	L_DC_WT_B.raw	3.54	0	0.0003459
	High	Sequest HT (A11)	Unambiguous	LAAGQAATIQPsSPR	S12(Phospho)	1	1	326504586	326504586	0	2	0.1099	0	1	1	774.843	1548.68	1547.76	594.42	0.46001	56884.6	CID (Collision Induced Dissociation)	MS2		18.884	29.6765	8436	L_DC_WT_B.raw	3.64	0	0.001226
	High	Sequest HT (A11)	Unambiguous	YFFSSLAGK		1	1	326504586	326504586	0	2	0.2618	0	1	1	511.087	1021.17	1019.52	1616.35	0.82395	120831	CID (Collision Induced Dissociation)	MS2		8.757	52.4935	17032	L_DC_WT_B.raw	1.91	0.002303	0.04755
High	Master Protein	326509643	Name:"Similar to LPXC5 Probable UDP-3-O-acyl-N-acetylglucosamine deacetylase 5, mitochondrial (Arabidopsis thaliana OX=3702)"	0.001	2.045	3.08642	1	3	1	1	324	34.3	6	5.91	1
	Confidence	Identifying Node	PSM Ambiguity	Annotated Sequence	Modifications	# Protein Groups	# Proteins	Master Protein Accessions	Protein Accessions	# Missed Cleavages	Charge	DeltaScore	DeltaCn	Rank	Search Engine Rank	m/z [Da]	MH+ [Da]	Theo. MH+ [Da]	DeltaM [ppm]	Deltam/z [Da]	Intensity	Activation Type	MS Order	Isolation Interference [%]	Ion Inject Time [ms]	RT [min]	First Scan	Spectrum File	XCorr	Percolator q-Value	Percolator PEP
	High	Sequest HT (A11)	Unambiguous	MsTAAAAAAR	S2(Phospho)	1	1	326509643	326509643	0	2	0.0507	0	1	1	500.337	999.667	1000.43	-760.69	-0.38051	98221.4	CID (Collision Induced Dissociation)	MS2		7.071	32.9172	9651	L_DC_WT_B.raw	2.96	0.005661	0.09179
	High	Sequest HT (A11)	Unambiguous	MStAAAAAAR	T3(Phospho)	1	1	326509643	326509643	0	2		0.0339	2	2	501.337	1001.67	1000.43	1238.49	0.61951	164391	CID (Collision Induced Dissociation)	MS2		10.856	32.7721	9598	L_DC_WT_B.raw	2.85	0	0.009021
	High	Sequest HT (A11)	Unambiguous	MsTAAAAAAR	S2(Phospho)	1	1	326509643	326509643	0	2	0.0339	0	1	1	501.337	1001.67	1000.43	1238.49	0.61951	164391	CID (Collision Induced Dissociation)	MS2		10.856	32.7721	9598	L_DC_WT_B.raw	2.95	0.0007882	0.02446
High	Master Protein	326521586	Name:"Similar to PUB70 U-box domain-containing protein 70 (Oryza sativa subsp. japonica OX=39947)"	0.005	1.384	4.09731	1	1	1	1	781	86	6.83	3.43	1
	Confidence	Identifying Node	PSM Ambiguity	Annotated Sequence	Modifications	# Protein Groups	# Proteins	Master Protein Accessions	Protein Accessions	# Missed Cleavages	Charge	DeltaScore	DeltaCn	Rank	Search Engine Rank	m/z [Da]	MH+ [Da]	Theo. MH+ [Da]	DeltaM [ppm]	Deltam/z [Da]	Intensity	Activation Type	MS Order	Isolation Interference [%]	Ion Inject Time [ms]	RT [min]	First Scan	Spectrum File	XCorr	Percolator q-Value	Percolator PEP
	High	Sequest HT (A11)	Unambiguous	NLPDVAPTAADVEVVVAHVHVPAKMIPVmGsK	M29(Oxidation); S31(Phospho)	1	1	326521586	326521586	1	3	0.0991	0	1	1	1130.43	3389.28	3387.72	461.43	0.52106	69576.1	CID (Collision Induced Dissociation)	MS2		36.888	98.0802	33845	L_DC_WT_B.raw	3.43	0.001896	0.04132
High	Master Protein	326517962	Name:"Similar to PLT6 Probable polyol transporter 6 (Arabidopsis thaliana OX=3702)"	0.007	1.209	2.55403	1	1	1	1	509	53.3	8.84	2.44	1
	Confidence	Identifying Node	PSM Ambiguity	Annotated Sequence	Modifications	# Protein Groups	# Proteins	Master Protein Accessions	Protein Accessions	# Missed Cleavages	Charge	DeltaScore	DeltaCn	Rank	Search Engine Rank	m/z [Da]	MH+ [Da]	Theo. MH+ [Da]	DeltaM [ppm]	Deltam/z [Da]	Intensity	Activation Type	MS Order	Isolation Interference [%]	Ion Inject Time [ms]	RT [min]	First Scan	Spectrum File	XCorr	Percolator q-Value	Percolator PEP
	High	Sequest HT (A11)	Unambiguous	tVFIMtAILLVDR	T1(Phospho); T6(Phospho)	1	1	326517962	326517962	0	2	0.1885	0	1	1	827.844	1654.68	1651.79	1747.68	1.4434	38439.9	CID (Collision Induced Dissociation)	MS2		50	112.403	38770	L_DC_WT_B.raw	2.44	0.003071	0.0618
		326526529

## Sheet: SHOOT_WT_replicate 3
Protein FDR Confidence	Master	Accession	Description	Exp. q-value	Sum PEP Score	Coverage	# Peptides	# PSMs	# Unique Peptides	# Protein Groups	# AAs	MW [kDa]	calc. pI	Score Sequest HT	# Peptides Sequest HT
High	Master Protein	326487308	Name:"Similar to PSBO Oxygen-evolving enhancer protein 1, chloroplastic (Triticum aestivum OX=4565)"	0	94.841	64.3293	20	110	20	1	328	34.4	5.9	375.64	20
	Confidence	Identifying Node	PSM Ambiguity	Annotated Sequence	Modifications	# Protein Groups	# Proteins	Master Protein Accessions	Protein Accessions	# Missed Cleavages	Charge	DeltaScore	DeltaCn	Rank	Search Engine Rank	m/z [Da]	MH+ [Da]	Theo. MH+ [Da]	DeltaM [ppm]	Deltam/z [Da]	Intensity	Activation Type	MS Order	Isolation Interference [%]	Ion Inject Time [ms]	RT [min]	First Scan	Spectrum File	XCorr	Percolator q-Value	Percolator PEP
	High	Sequest HT (A11)	Unambiguous	GDEEELAKENVK		1	1	326487308	326487308	1	2	0.263	0	1	1	680.757	1360.51	1360.66	-111.43	-0.07581	17211.1	CID (Collision Induced Dissociation)	MS2		50	18.4348	4250	L_DC_WT_AB.raw	3.65	0	0.01316
	High	Sequest HT (A11)	Unambiguous	LTYTLDEmEGPLEVGADGTLK	M8(Oxidation)	1	1	326487308	326487308	0	2	0.5598	0	1	1	1134.43	2267.86	2268.1	-104.42	-0.11842	285420	CID (Collision Induced Dissociation)	MS2		4.999	71.2623	23727	L_DC_WT_AB.raw	5.52	0	2.097e-05
	High	Sequest HT (A11)	Unambiguous	IQGVWYAQLESN		1	1	326487308	326487308	0	2	0.5584	0	1	1	704.424	1407.84	1407.69	107.55	0.0757	776979	CID (Collision Induced Dissociation)	MS2		1.526	71.3536	23762	L_DC_WT_AB.raw	3.85	0	0.0004034
	High	Sequest HT (A11)	Unambiguous	IQGVWYAQLESN		1	1	326487308	326487308	0	2	0.384	0	1	1	703.674	1406.34	1407.69	-958.05	-0.67432	141893	CID (Collision Induced Dissociation)	MS2		2.025	71.3582	23764	L_DC_WT_AB.raw	2.63	0.0002846	0.0217
	High	Sequest HT (A11)	Unambiguous	DGIDYAAVTVQLPGGER		1	1	326487308	326487308	0	2	0.5142	0	1	1	880.261	1759.52	1760.88	-775.85	-0.68309	47352	CID (Collision Induced Dissociation)	MS2		3.703	71.4807	23811	L_DC_WT_AB.raw	3.52	0	1.55e-05
	High	Sequest HT (A11)	Unambiguous	LTYTLDEmEGPLEVGADGTLK	M8(Oxidation)	1	1	326487308	326487308	0	3	0.4223	0	1	1	756.842	2268.51	2268.1	183.76	0.13893	186511	CID (Collision Induced Dissociation)	MS2		3.12	71.6899	23888	L_DC_WT_AB.raw	3.86	0.0002846	0.02121
	High	Sequest HT (A11)	Unambiguous	VPFLFTVK		1	1	326487308	326487308	0	2	0.3522	0	1	1	475.837	950.666	950.571	100.18	0.04761	111255	CID (Collision Induced Dissociation)	MS2		17.158	72.5202	24201	L_DC_WT_AB.raw	2.3	0.002898	0.05707
	High	Sequest HT (A11)	Unambiguous	LTYTLDEmEGPLEVGADGTLK	M8(Oxidation)	1	1	326487308	326487308	0	2	0.404	0	1	1	1135.77	2270.53	2268.1	1071.33	1.21494	82843.3	CID (Collision Induced Dissociation)	MS2		15.811	72.6667	24256	L_DC_WT_AB.raw	4.53	0	0.00329
	High	Sequest HT (A11)	Unambiguous	IQGVWYAQLESN		1	1	326487308	326487308	0	2	0.5878	0	1	1	704.341	1407.68	1407.69	-10.85	-0.00764	283366	CID (Collision Induced Dissociation)	MS2		4.172	72.7931	24302	L_DC_WT_AB.raw	4.27	0	0.0007511
	High	Sequest HT (A11)	Unambiguous	LTYTLDEmEGPLEVGADGTLK	M8(Oxidation)	1	1	326487308	326487308	0	2	0.6166	0	1	1	1134.93	2268.86	2268.1	336.49	0.38159	196114	CID (Collision Induced Dissociation)	MS2		10.402	71.1175	23672	L_DC_WT_AB.raw	6.26	0	1.915e-06
	High	Sequest HT (A11)	Unambiguous	VPFLFTVK		1	1	326487308	326487308	0	2	0.3609	0	1	1	475.42	949.833	950.571	-776.51	-0.36906	91525	CID (Collision Induced Dissociation)	MS2		11.52	72.8672	24330	L_DC_WT_AB.raw	2.3	0.003621	0.07485
	High	Sequest HT (A11)	Unambiguous	LTYTLDEmEGPLEVGADGTLK	M8(Oxidation)	1	1	326487308	326487308	0	2	0.5963	0	1	1	1135.1	2269.19	2268.1	483.46	0.54826	70059.7	CID (Collision Induced Dissociation)	MS2		14.102	73.3527	24514	L_DC_WT_AB.raw	5.45	0	0.004528
	High	Sequest HT (A11)	Unambiguous	IQGVWYAQLESN		1	1	326487308	326487308	0	2	0.1726	0	1	1	705.841	1410.68	1407.69	2120.34	1.49239	119930	CID (Collision Induced Dissociation)	MS2		7.903	74.2231	24844	L_DC_WT_AB.raw	2.26	0.003456	0.06809
	High	Sequest HT (A11)	Unambiguous	VPFLFTVK		1	1	326487308	326487308	0	2	0.372	0	1	1	476.337	951.666	950.571	1152.2	0.54762	87984.2	CID (Collision Induced Dissociation)	MS2		22.182	74.4987	24948	L_DC_WT_AB.raw	2.07	0.0002846	0.0173
	High	Sequest HT (A11)	Unambiguous	LTYTLDEmEGPLEVGADGTLKFEEK	M8(Oxidation)	1	1	326487308	326487308	1	3	0.3043	0	1	1	935.096	2803.27	2801.34	688.44	0.64285	114409	CID (Collision Induced Dissociation)	MS2		13.226	74.6551	25007	L_DC_WT_AB.raw	3.68	0	0.01148
	High	Sequest HT (A11)	Unambiguous	IQGVWYAQLESN		1	1	326487308	326487308	0	2	0.4986	0	1	1	704.924	1408.84	1407.69	817.95	0.57571	447253	CID (Collision Induced Dissociation)	MS2		3.111	74.7904	25059	L_DC_WT_AB.raw	3.61	0.0002846	0.0175
	High	Sequest HT (A11)	Unambiguous	LTYTLDEmEGPLEVGADGTLKFEEK	M8(Oxidation)	1	1	326487308	326487308	1	3	0.1478	0	1	1	934.679	2802.02	2801.34	242.22	0.22618	133139	CID (Collision Induced Dissociation)	MS2		8.933	75.0854	25170	L_DC_WT_AB.raw	3.45	0	0.0009904
	High	Sequest HT (A11)	Unambiguous	DGIDYAAVTVQLPGGER		1	1	326487308	326487308	0	2	0.3465	0	1	1	881.095	1761.18	1760.88	170.66	0.15026	73334.6	CID (Collision Induced Dissociation)	MS2		20.01	75.1229	25184	L_DC_WT_AB.raw	3.29	0	0.001849
	High	Sequest HT (A11)	Unambiguous	VPFLFTVK		1	1	326487308	326487308	0	2	0.285	0	1	1	475.337	949.666	950.571	-951.84	-0.4524	73772.5	CID (Collision Induced Dissociation)	MS2		13.533	75.3886	25285	L_DC_WT_AB.raw	2.14	0.005527	0.102
	High	Sequest HT (A11)	Unambiguous	IQGVWYAQLESN		1	1	326487308	326487308	0	2	0.0928	0	1	1	705.091	1409.18	1407.69	1054.75	0.74238	127385	CID (Collision Induced Dissociation)	MS2		7.12	76.2258	25600	L_DC_WT_AB.raw	1.94	0.006592	0.1201
	High	Sequest HT (A11)	Unambiguous	DGIDYAAVTVQLPGGER		1	1	326487308	326487308	0	2	0.1074	0	1	1	881.428	1761.85	1760.88	549.27	0.4836	282037	CID (Collision Induced Dissociation)	MS2		5.537	72.9852	24374	L_DC_WT_AB.raw	2.7	0	0.01119
	High	Sequest HT (A11)	Unambiguous	IQGVWYAQLESN		1	1	326487308	326487308	0	2	0.2941	0	1	1	704.341	1407.68	1407.69	-10.85	-0.00764	84938.5	CID (Collision Induced Dissociation)	MS2		6.843	76.2794	25621	L_DC_WT_AB.raw	2.55	0.003266	0.06691
	High	Sequest HT (A11)	Unambiguous	LTYTLDEmEGPLEVGADGTLK	M8(Oxidation)	1	1	326487308	326487308	0	3	0.4891	0	1	1	757.342	2270.01	2268.1	845.12	0.63894	206597	CID (Collision Induced Dissociation)	MS2		4.032	71.0732	23655	L_DC_WT_AB.raw	5.52	0	0.0002594
	High	Sequest HT (A11)	Unambiguous	LTYTLDEmEGPLEVGADGTLK	M8(Oxidation)	1	1	326487308	326487308	0	2	0.3026	0	1	1	1136.02	2271.03	2268.1	1291.79	1.46495	140772	CID (Collision Induced Dissociation)	MS2		12.962	70.8742	23579	L_DC_WT_AB.raw	4.23	0	0.0001828
	High	Sequest HT (A11)	Unambiguous	SKPETGEVIGVFESVQPSDTDLGAK		1	1	326487308	326487308	0	2	0.5282	0	1	1	1296.1	2591.2	2590.29	351.18	0.45483	144536	CID (Collision Induced Dissociation)	MS2		14.391	66.4887	21895	L_DC_WT_AB.raw	4.79	0	0.0003257
	High	Sequest HT (A11)	Unambiguous	QLVATGKPESFSGPFLVPSYR		1	1	326487308	326487308	0	2	0.3146	0	1	1	1141.52	2282.03	2280.2	799.48	0.91149	163628	CID (Collision Induced Dissociation)	MS2		10.805	66.5855	21933	L_DC_WT_AB.raw	3.02	0	0.002428
	High	Sequest HT (A11)	Unambiguous	VPFLFTVK		1	1	326487308	326487308	0	2	0.4047	0	1	1	475.837	950.666	950.571	100.18	0.04761	6.92108e+06	CID (Collision Induced Dissociation)	MS2		0.182	66.6151	21944	L_DC_WT_AB.raw	2.57	0.006921	0.1257
	High	Sequest HT (A11)	Unambiguous	QLVATGKPESFSGPFLVPSYR		1	1	326487308	326487308	0	3	0.2442	0	1	1	761.736	2283.19	2280.2	1311.74	0.99701	1.4663e+06	CID (Collision Induced Dissociation)	MS2		0.691	66.8471	22034	L_DC_WT_AB.raw	3.44	0	0.007475
	High	Sequest HT (A11)	Unambiguous	QLVATGKPESFSGPFLVPSYR		1	1	326487308	326487308	0	3	0.3289	0	1	1	761.092	2281.26	2280.2	464.83	0.3533	1.29833e+06	CID (Collision Induced Dissociation)	MS2		0.976	67.1706	22160	L_DC_WT_AB.raw	3.74	0	0.004222
	High	Sequest HT (A11)	Unambiguous	QLVATGKPESFSGPFLVPSYR		1	1	326487308	326487308	0	2	0.3064	0	1	1	1140.52	2280.03	2280.2	-77.65	-0.08853	227586	CID (Collision Induced Dissociation)	MS2		14.947	67.4219	22258	L_DC_WT_AB.raw	2.97	0	0.003943
	High	Sequest HT (A11)	Unambiguous	SKPETGEVIGVFESVQPSDTDLGAK		1	1	326487308	326487308	0	3	0.2495	0	1	1	864.761	2592.27	2590.29	764.37	0.65998	283418	CID (Collision Induced Dissociation)	MS2		4.89	67.6821	22358	L_DC_WT_AB.raw	4.65	0	0.0002564
	High	Sequest HT (A11)	Unambiguous	VPFLFTVK		1	1	326487308	326487308	0	1	0.2316	0	1	1	950.763	950.763	950.571	201.58	0.19162	172184	CID (Collision Induced Dissociation)	MS2		10.255	67.7845	22397	L_DC_WT_AB.raw	1.77	0.006259	0.1126
	High	Sequest HT (A11)	Unambiguous	GTGTANQcPTIDGGVDSFPFK	C8(Carbamidomethyl)	1	1	326487308	326487308	0	3	0.1957	0	1	1	723.925	2169.76	2168.99	354.24	0.25611	77068.5	CID (Collision Induced Dissociation)	MS2		21.298	67.9471	22459	L_DC_WT_AB.raw	3.22	0	0.004312
	High	Sequest HT (A11)	Unambiguous	VPFLFTVK		1	1	326487308	326487308	0	2	0.3534	0	1	1	475.587	950.166	950.571	-425.83	-0.20239	45802.8	CID (Collision Induced Dissociation)	MS2		7.563	71.0485	23646	L_DC_WT_AB.raw	2.32	0.001031	0.03746
	High	Sequest HT (A11)	Unambiguous	VPFLFTVK		1	1	326487308	326487308	0	2	0.4692	0	1	1	475.837	950.666	950.571	100.18	0.04761	1.86704e+06	CID (Collision Induced Dissociation)	MS2		0.787	68.0146	22484	L_DC_WT_AB.raw	2.6	0.001031	0.03495
	High	Sequest HT (A11)	Unambiguous	GTGTANQcPTIDGGVDSFPFK	C8(Carbamidomethyl)	1	1	326487308	326487308	0	2	0.3429	0	1	1	1086.43	2171.86	2168.99	1320.78	1.43238	160712	CID (Collision Induced Dissociation)	MS2		19.374	68.7443	22766	L_DC_WT_AB.raw	3.47	0	0.00265
	High	Sequest HT (A11)	Unambiguous	FcLEPTSFTVK	C2(Carbamidomethyl)	1	1	326487308	326487308	0	2	0.2009	0	1	1	664.676	1328.34	1328.66	-234.14	-0.15555	111258	CID (Collision Induced Dissociation)	MS2		6.012	68.9679	22850	L_DC_WT_AB.raw	2.14	0.001269	0.04506
	High	Sequest HT (A11)	Unambiguous	VPFLFTVK		1	1	326487308	326487308	0	2	0.4211	0	1	1	475.253	949.5	950.571	-1127.18	-0.53573	62162.8	CID (Collision Induced Dissociation)	MS2		22.074	69.318	22984	L_DC_WT_AB.raw	2.09	0.0002846	0.01831
	High	Sequest HT (A11)	Unambiguous	QLVATGKPESFSGPFLVPSYR		1	1	326487308	326487308	0	3	0.2457	0	1	1	760.926	2280.76	2280.2	245.55	0.18663	104814	CID (Collision Induced Dissociation)	MS2		16.826	69.6747	23120	L_DC_WT_AB.raw	3.5	0.001031	0.04079
	High	Sequest HT (A11)	Unambiguous	DGIDYAAVTVQLPGGER		1	1	326487308	326487308	0	3	0.2941	0	1	1	587.589	1760.75	1760.88	-73.38	-0.04307	562659	CID (Collision Induced Dissociation)	MS2		1.912	70.3683	23384	L_DC_WT_AB.raw	3.57	0	0.0004332
	High	Sequest HT (A11)	Unambiguous	DGIDYAAVTVQLPGGER		1	1	326487308	326487308	0	2	0.4898	0	1	1	881.011	1761.02	1760.88	76.01	0.06692	2.51507e+06	CID (Collision Induced Dissociation)	MS2		0.539	70.5079	23438	L_DC_WT_AB.raw	3.43	0	6.551e-06
	High	Sequest HT (A11)	Unambiguous	DGIDYAAVTVQLPGGER		1	1	326487308	326487308	0	3	0.2764	0	1	1	587.237	1759.69	1760.88	-673.74	-0.39546	518899	CID (Collision Induced Dissociation)	MS2		2.559	70.5103	23439	L_DC_WT_AB.raw	3.69	0	0.0002272
	High	Sequest HT (A11)	Unambiguous	SKPETGEVIGVFESVQPSDTDLGAK		1	1	326487308	326487308	0	3	0.2819	0	1	1	864.094	2590.27	2590.29	-7.76	-0.0067	165879	CID (Collision Induced Dissociation)	MS2		4.425	68.1076	22520	L_DC_WT_AB.raw	4.54	0	0.0002521
	High	Sequest HT (A11)	Unambiguous	VPFLFTVK		1	1	326487308	326487308	0	2	0.2763	0	1	1	477.113	953.219	950.571	2785.26	1.32379	166732	CID (Collision Induced Dissociation)	MS2		11.098	66.2557	21806	L_DC_WT_AB.raw	2.57	0.002443	0.05307
	High	Sequest HT (A11)	Unambiguous	LTYTLDEmEGPLEVGADGTLKFEEK	M8(Oxidation)	1	1	326487308	326487308	1	3	0.2795	0	1	1	935.012	2803.02	2801.34	599.2	0.55952	120054	CID (Collision Induced Dissociation)	MS2		18.678	76.6096	25745	L_DC_WT_AB.raw	3.9	0	0.00106
	High	Sequest HT (A11)	Unambiguous	IQGVWYAQLESN		1	1	326487308	326487308	0	2	0.259	0	1	1	704.758	1408.51	1407.69	581.15	0.40904	75771.3	CID (Collision Induced Dissociation)	MS2		10.627	77.8047	26195	L_DC_WT_AB.raw	2.51	0.008431	0.1342
	High	Sequest HT (A11)	Unambiguous	IQGVWYAQLESN		1	1	326487308	326487308	0	2	0.2391	0	1	1	704.591	1408.18	1407.69	344.35	0.24237	75416.4	CID (Collision Induced Dissociation)	MS2		37.323	95.2065	32576	L_DC_WT_AB.raw	2.3	0	0.003129
	High	Sequest HT (A11)	Selected	IQGVWYAQLESN		1	1	326487308	326487308	0	2	0.0354	0	1	1	704.758	1408.51	1407.69	581.15	0.40904	46063	CID (Collision Induced Dissociation)	MS2		42.253	106.215	36442	L_DC_WT_AB.raw	1.98	0.002667	0.05615
	High	Sequest HT (A11)	Unambiguous	IQGVWYAQLESN		1	1	326487308	326487308	0	2	0.2228	0	1	1	704.841	1408.68	1407.69	699.55	0.49237	46091.3	CID (Collision Induced Dissociation)	MS2		34.474	111.738	38354	L_DC_WT_AB.raw	1.93	0.003266	0.06467
	High	Sequest HT (A11)	Unambiguous	LTYTLDEmEGPLEVGADGTLKFEEK	M8(Oxidation)	1	1	326487308	326487308	1	3	0.2602	0	1	1	934.679	2802.02	2801.34	242.22	0.22618	84030.7	CID (Collision Induced Dissociation)	MS2		14.253	76.7784	25809	L_DC_WT_AB.raw	3.69	0	0.002191
	High	Sequest HT (A11)	Unambiguous	LTYTLDEMEGPLEVGADGTLKFEEK		1	1	326487308	326487308	1	3	0.1631	0	1	1	929.346	2786.02	2785.35	241.67	0.22438	41829.9	CID (Collision Induced Dissociation)	MS2		43.75	90.0748	30721	L_DC_WT_AB.raw	3.31	0.0002846	0.0253
	High	Sequest HT (A11)	Unambiguous	LTYTLDEMEGPLEVGADGTLKFEEK		1	1	326487308	326487308	1	3	0.1414	0	1	1	929.012	2785.02	2785.35	-117.35	-0.10896	104405	CID (Collision Induced Dissociation)	MS2		24.13	86.6969	29486	L_DC_WT_AB.raw	2.97	0	0.01123
	High	Sequest HT (A11)	Unambiguous	LTYTLDEMEGPLEVGADGTLK		1	1	326487308	326487308	0	2	0.5918	0	1	1	1126.93	2252.86	2252.1	336.48	0.37889	141652	CID (Collision Induced Dissociation)	MS2		17.966	79.7465	26918	L_DC_WT_AB.raw	5.39	0	2.915e-06
	High	Sequest HT (A11)	Unambiguous	LTYTLDEMEGPLEVGADGTLK		1	1	326487308	326487308	0	3	0.5784	0	1	1	751.759	2253.26	2252.1	515.7	0.38713	608715	CID (Collision Induced Dissociation)	MS2		1.411	80.5544	27218	L_DC_WT_AB.raw	5.93	0	0.0003151
	High	Sequest HT (A11)	Unambiguous	LTYTLDEMEGPLEVGADGTLK		1	1	326487308	326487308	0	2	0.5665	0	1	1	1127.02	2253.02	2252.1	410.49	0.46223	529178	CID (Collision Induced Dissociation)	MS2		2.645	81.1886	27453	L_DC_WT_AB.raw	5.56	0	2.194e-05
	High	Sequest HT (A11)	Unambiguous	LTYTLDEMEGPLEVGADGTLKFEEK		1	1	326487308	326487308	1	3	0.4264	0	1	1	929.096	2785.27	2785.35	-27.6	-0.02562	303242	CID (Collision Induced Dissociation)	MS2		3.285	81.4726	27560	L_DC_WT_AB.raw	3.94	0	0.0002965
	High	Sequest HT (A11)	Unambiguous	LTYTLDEmEGPLEVGADGTLKFEEK	M8(Oxidation)	1	1	326487308	326487308	1	3	0.1833	0	1	1	934.012	2800.02	2801.34	-471.74	-0.4405	56173.6	CID (Collision Induced Dissociation)	MS2		18.298	81.6459	27626	L_DC_WT_AB.raw	3.6	0.003266	0.06746
	High	Sequest HT (A11)	Unambiguous	LTYTLDEMEGPLEVGADGTLKFEEK		1	1	326487308	326487308	1	3	0.4352	0	1	1	928.762	2784.27	2785.35	-386.63	-0.35896	58037.8	CID (Collision Induced Dissociation)	MS2		2.744	81.7211	27653	L_DC_WT_AB.raw	3.47	0	0.002494
	High	Sequest HT (A11)	Unambiguous	LTYTLDEMEGPLEVGADGTLK		1	1	326487308	326487308	0	2	0.4875	0	1	1	1127.27	2253.52	2252.1	632.51	0.71223	60652	CID (Collision Induced Dissociation)	MS2		28.966	82.7708	28041	L_DC_WT_AB.raw	5.6	0	0.0001672
	High	Sequest HT (A11)	Unambiguous	IQGVWYAQLESN		1	1	326487308	326487308	0	2	0.2069	0	1	1	704.674	1408.34	1407.69	462.75	0.3257	67507.4	CID (Collision Induced Dissociation)	MS2		29.041	82.9133	28094	L_DC_WT_AB.raw	2.32	0.008253	0.134
	High	Sequest HT (A11)	Unambiguous	LTYTLDEMEGPLEVGADGTLKFEEK		1	1	326487308	326487308	1	3	0.2288	0	1	1	929.429	2786.27	2785.35	331.43	0.30772	290942	CID (Collision Induced Dissociation)	MS2		4.406	83.174	28190	L_DC_WT_AB.raw	3.19	0	0.006066
	High	Sequest HT (A11)	Unambiguous	LTYTLDEMEGPLEVGADGTLKFEEK		1	1	326487308	326487308	1	3	0.2917	0	1	1	929.429	2786.27	2785.35	331.43	0.30772	150490	CID (Collision Induced Dissociation)	MS2		18.148	84.6372	28732	L_DC_WT_AB.raw	3.6	0	0.0106
	High	Sequest HT (A11)	Unambiguous	LTYTLDEMEGPLEVGADGTLKFEEK		1	1	326487308	326487308	1	3	0.3459	0	1	1	928.512	2783.52	2785.35	-655.9	-0.60897	179847	CID (Collision Induced Dissociation)	MS2		19.672	84.7334	28767	L_DC_WT_AB.raw	3.44	0	0.001073
	High	Sequest HT (A11)	Unambiguous	LTYTLDEMEGPLEVGADGTLK		1	1	326487308	326487308	0	2	0.3634	0	1	1	1126.02	2251.02	2252.1	-477.59	-0.53779	68708.8	CID (Collision Induced Dissociation)	MS2		29.001	84.946	28846	L_DC_WT_AB.raw	3.22	0	0.001143
	High	Sequest HT (A11)	Unambiguous	LTYTLDEMEGPLEVGADGTLKFEEK		1	1	326487308	326487308	1	3	0.2928	0	1	1	929.762	2787.27	2785.35	690.46	0.64106	146514	CID (Collision Induced Dissociation)	MS2		12.42	86.2022	29306	L_DC_WT_AB.raw	3.45	0.001031	0.03252
	High	Sequest HT (A11)	Unambiguous	LTYTLDEMEGPLEVGADGTLK		1	1	326487308	326487308	0	3	0.4378	0	1	1	751.759	2253.26	2252.1	515.7	0.38713	118562	CID (Collision Induced Dissociation)	MS2		10.495	82.0027	27759	L_DC_WT_AB.raw	5.39	0	0.000566
	High	Sequest HT (A11)	Unambiguous	SKPETGEVIGVFESVQPSDTDLGAK		1	1	326487308	326487308	0	3	0.2678	0	1	1	864.428	2591.27	2590.29	378.31	0.32664	2300699	CID (Collision Induced Dissociation)	MS2		0.596	66.2413	21800	L_DC_WT_AB.raw	4.63	0	0.0005106
	High	Sequest HT (A11)	Unambiguous	GTGTANQcPTIDGGVDSFPFK	C8(Carbamidomethyl)	1	1	326487308	326487308	0	2	0.5016	0	1	1	1084.52	2168.02	2168.99	-446.58	-0.48432	284728	CID (Collision Induced Dissociation)	MS2		9.581	65.749	21609	L_DC_WT_AB.raw	3.09	0	0.007343
	High	Sequest HT (A11)	Unambiguous	SKPETGEVIGVFESVQPSDTDLGAK		1	1	326487308	326487308	0	3	0.1167	0	1	1	864.844	2592.52	2590.29	860.89	0.74332	175947	CID (Collision Induced Dissociation)	MS2		4.875	65.7394	21605	L_DC_WT_AB.raw	4.54	0	0.000566
	High	Sequest HT (A11)	Unambiguous	NASSSTGNITLSVTK		1	1	326487308	326487308	0	2	0.5395	0	1	1	739.842	1478.68	1479.76	-735.61	-0.54426	51142.1	CID (Collision Induced Dissociation)	MS2		9.795	36.561	10620	L_DC_WT_AB.raw	3.54	0	0.000577
	High	Sequest HT (A11)	Unambiguous	NASSSTGNITLSVTK		1	1	326487308	326487308	0	2	0.3887	0	1	1	741.342	1481.68	1479.76	1291.78	0.95577	97925.2	CID (Collision Induced Dissociation)	MS2		10.353	36.7689	10697	L_DC_WT_AB.raw	3.37	0	0.01119
	High	Sequest HT (A11)	Unambiguous	NASSSTGNITLSVTK		1	1	326487308	326487308	0	2	0.25	0	1	1	740.842	1480.68	1479.76	615.99	0.45576	159436	CID (Collision Induced Dissociation)	MS2		7.952	38.0295	11164	L_DC_WT_AB.raw	2.76	0.003091	0.05876
	High	Sequest HT (A11)	Unambiguous	GGSTGYDNAVALPAGGR		1	1	326487308	326487308	0	2	0.5818	0	1	1	781.843	1562.68	1562.76	-49.74	-0.03887	621155	CID (Collision Induced Dissociation)	MS2		3.457	38.1747	11216	L_DC_WT_AB.raw	4.28	0	0.0007595
	High	Sequest HT (A11)	Unambiguous	GGSTGYDNAVALPAGGR		1	1	326487308	326487308	0	2	0.095	0	1	1	782.426	1563.84	1562.76	696.82	0.54448	285723	CID (Collision Induced Dissociation)	MS2		5.141	39.631	11756	L_DC_WT_AB.raw	2.42	0	0.002418
	High	Sequest HT (A11)	Unambiguous	GGSTGYDNAVALPAGGR		1	1	326487308	326487308	0	2	0.176	0	1	1	781.926	1562.84	1562.76	56.91	0.04447	122410	CID (Collision Induced Dissociation)	MS2		7.401	39.6382	11759	L_DC_WT_AB.raw	2.5	0	0.007482
	High	Sequest HT (A11)	Unambiguous	GGSTGYDNAVALPAGGR		1	1	326487308	326487308	0	2	0.0536	0	1	1	781.843	1562.68	1562.76	-49.74	-0.03887	74774.7	CID (Collision Induced Dissociation)	MS2		16.954	41.5066	12446	L_DC_WT_AB.raw	2.24	0.0002846	0.02672
	High	Sequest HT (A11)	Unambiguous	LTFDEIQSK		1	1	326487308	326487308	0	2	0.2624	0	1	1	540.755	1080.5	1080.56	-51.02	-0.02756	1905176	CID (Collision Induced Dissociation)	MS2		0.719	41.5938	12476	L_DC_WT_AB.raw	2.02	0.0008329	0.03121
	High	Sequest HT (A11)	Unambiguous	NASSSTGNITLSVTK		1	1	326487308	326487308	0	2	0.2007	0	1	1	740.842	1480.68	1479.76	615.99	0.45576	68423.8	CID (Collision Induced Dissociation)	MS2		20.035	42.7547	12900	L_DC_WT_AB.raw	2.74	0.004207	0.08631
	High	Sequest HT (A11)	Unambiguous	GGSTGYDNAVALPAGGRGDEEELAKENVK		1	1	326487308	326487308	2	3	0.1888	0	1	1	968.763	2904.27	2904.4	-42.26	-0.04091	44481.4	CID (Collision Induced Dissociation)	MS2		30.393	42.9112	12960	L_DC_WT_AB.raw	3.39	0.001269	0.04406
	High	Sequest HT (A11)	Unambiguous	NASSSTGNITLSVTK		1	1	326487308	326487308	0	2	0.2891	0	1	1	741.425	1481.84	1479.76	1404.42	1.0391	119755	CID (Collision Induced Dissociation)	MS2		5.154	41.3767	12397	L_DC_WT_AB.raw	2.94	0.0002846	0.02027
	High	Sequest HT (A11)	Unambiguous	GGSTGYDNAVALPAGGRGDEEELAKENVK		1	1	326487308	326487308	2	3	0.1738	0	1	1	969.096	2905.27	2904.4	302.06	0.29243	97269.4	CID (Collision Induced Dissociation)	MS2		20.029	44.408	13506	L_DC_WT_AB.raw	3.28	0	0.01035
	High	Sequest HT (A11)	Unambiguous	NASSSTGNITLSVTK		1	1	326487308	326487308	0	2	0.486	0	1	1	741.425	1481.84	1479.76	1404.42	1.0391	1.59589e+06	CID (Collision Induced Dissociation)	MS2		0.332	34.7999	9974	L_DC_WT_AB.raw	3.93	0	0.002066
	High	Sequest HT (A11)	Unambiguous	GDEEELAKENVK		1	1	326487308	326487308	1	2	0.3133	0	1	1	681.424	1361.84	1360.66	868.51	0.59087	39093.2	CID (Collision Induced Dissociation)	MS2		21.503	20.1067	4791	L_DC_WT_AB.raw	3.83	0	0.0104
	High	Sequest HT (A11)	Unambiguous	GDEEELAKENVK		1	1	326487308	326487308	1	2	0.32	0	1	1	680.841	1360.67	1360.66	11.07	0.00753	41936.2	CID (Collision Induced Dissociation)	MS2		25.48	20.1092	4792	L_DC_WT_AB.raw	3.75	0.0002846	0.01758
	High	Sequest HT (A11)	Unambiguous	AEGIQKNEPPAFQK		1	1	326487308	326487308	1	2	0.0728	0	1	1	779.009	1557.01	1556.81	131.37	0.10226	22556.9	CID (Collision Induced Dissociation)	MS2		50	23.3173	5866	L_DC_WT_AB.raw	2.61	0	0.01184
	High	Sequest HT (A11)	Unambiguous	GRGGSTGYDNAVALPAGGR		1	1	326487308	326487308	1	3	0.2469	0	1	1	593.089	1777.25	1775.88	773.77	0.45804	139538	CID (Collision Induced Dissociation)	MS2		7.605	30.2452	8318	L_DC_WT_AB.raw	3.2	0.003456	0.07122
	High	Sequest HT (A11)	Unambiguous	GRGGSTGYDNAVALPAGGR		1	1	326487308	326487308	1	3	0.1157	0	1	1	592.589	1775.75	1775.88	-70.9	-0.04197	192732	CID (Collision Induced Dissociation)	MS2		8.077	30.5486	8426	L_DC_WT_AB.raw	2.68	0.003621	0.07204
	High	Sequest HT (A11)	Unambiguous	GRGGSTGYDNAVALPAGGR		1	1	326487308	326487308	1	2	0.2914	0	1	1	888.178	1775.35	1775.88	-298.18	-0.26476	50853.2	CID (Collision Induced Dissociation)	MS2		34.334	30.6691	8472	L_DC_WT_AB.raw	3.02	0.0002846	0.01645
	High	Sequest HT (A11)	Unambiguous	NASSSTGNITLSVTK		1	1	326487308	326487308	0	2	0.6236	0	1	1	740.425	1479.84	1479.76	52.82	0.03908	3964241	CID (Collision Induced Dissociation)	MS2		0.385	35.2911	10154	L_DC_WT_AB.raw	4.33	0	0.001586
	High	Sequest HT (A11)	Unambiguous	RLTFDEIQSK		1	1	326487308	326487308	1	2	0.1789	0	1	1	618.84	1236.67	1236.66	10.87	0.00672	686132	CID (Collision Induced Dissociation)	MS2		2.091	33.6582	9561	L_DC_WT_AB.raw	2.46	0.005192	0.09537
	High	Sequest HT (A11)	Unambiguous	NASSSTGNITLSVTK		1	1	326487308	326487308	0	2	0.3046	0	1	1	741.842	1482.68	1479.76	1967.58	1.45578	284242	CID (Collision Induced Dissociation)	MS2		3.156	34.51	9868	L_DC_WT_AB.raw	3.02	0.005357	0.1004
	High	Sequest HT (A11)	Unambiguous	NASSSTGNITLSVTK		1	1	326487308	326487308	0	1	0.1822	0	1	1	1479.77	1479.77	1479.76	5.33	0.00789	57978.9	CID (Collision Induced Dissociation)	MS2		45.709	34.7905	9972	L_DC_WT_AB.raw	2.25	0	0.001858
	High	Sequest HT (A11)	Unambiguous	GGSTGYDNAVALPAGGRGDEEELAK		1	1	326487308	326487308	1	3	0.2646	0	1	1	812.51	2435.52	2434.15	561.63	0.4557	122927	CID (Collision Induced Dissociation)	MS2		11.107	44.7479	13631	L_DC_WT_AB.raw	3.25	0.006104	0.1095
	High	Sequest HT (A11)	Unambiguous	GGSTGYDNAVALPAGGRGDEEELAK		1	1	326487308	326487308	1	3	0.1233	0	1	1	812.093	2434.27	2434.15	48.1	0.03903	115184	CID (Collision Induced Dissociation)	MS2		13.192	44.7528	13633	L_DC_WT_AB.raw	2.92	0.004583	0.09181
	High	Sequest HT (A11)	Unambiguous	FEEKDGIDYAAVTVQLPGGER		1	1	326487308	326487308	1	3	0.3818	0	1	1	764.676	2292.01	2294.13	-923.01	-0.70584	97801.8	CID (Collision Induced Dissociation)	MS2		3.169	63.3995	20706	L_DC_WT_AB.raw	3.85	0	0.0066
	High	Sequest HT (A11)	Unambiguous	GTGTANQcPTIDGGVDSFPFK	C8(Carbamidomethyl)	1	1	326487308	326487308	0	2	0.5278	0	1	1	1085.43	2169.86	2168.99	398.68	0.43237	113010	CID (Collision Induced Dissociation)	MS2		13.675	63.8327	20871	L_DC_WT_AB.raw	4.32	0	1.177e-05
	High	Sequest HT (A11)	Unambiguous	GTGTANQcPTIDGGVDSFPFK	C8(Carbamidomethyl)	1	1	326487308	326487308	0	3	0.457	0	1	1	723.758	2169.26	2168.99	123.71	0.08944	265838	CID (Collision Induced Dissociation)	MS2		3.649	64.0471	20954	L_DC_WT_AB.raw	5.12	0	4.763e-05
	High	Sequest HT (A11)	Unambiguous	FEEKDGIDYAAVTVQLPGGER		1	1	326487308	326487308	1	2	0.5047	0	1	1	1147.02	2293.03	2294.13	-481.41	-0.55221	204109	CID (Collision Induced Dissociation)	MS2		25.877	64.0788	20967	L_DC_WT_AB.raw	4.26	0	0.0003867
	High	Sequest HT (A11)	Unambiguous	FEEKDGIDYAAVTVQLPGGER		1	1	326487308	326487308	1	2	0.1175	0	1	1	1148.85	2296.69	2294.13	1116.9	1.28115	193122	CID (Collision Induced Dissociation)	MS2		23.866	64.1691	21001	L_DC_WT_AB.raw	3.32	0.0002846	0.01765
	High	Sequest HT (A11)	Unambiguous	FcLEPTSFTVK	C2(Carbamidomethyl)	1	1	326487308	326487308	0	2	0.3542	0	1	1	665.424	1329.84	1328.66	891.65	0.59235	1.10464e+06	CID (Collision Induced Dissociation)	MS2		1.046	64.3284	21062	L_DC_WT_AB.raw	2.88	0.001031	0.03523
	High	Sequest HT (A11)	Unambiguous	FcLEPTSFTVK	C2(Carbamidomethyl)	1	1	326487308	326487308	0	2	0.3893	0	1	1	664.84	1328.67	1328.66	13.55	0.009	736559	CID (Collision Induced Dissociation)	MS2		2.154	64.4686	21116	L_DC_WT_AB.raw	2.98	0	0.008534
	High	Sequest HT (A11)	Unambiguous	GTGTANQCPtIDGGVDSFPFK	T10(Phospho)	1	1	326487308	326487308	0	3	0.1779	0	1	1	731.008	2191.01	2191.94	-422.51	-0.30871	177770	CID (Collision Induced Dissociation)	MS2		8.688	64.7554	21224	L_DC_WT_AB.raw	2.98	0.0002846	0.02454
	High	Sequest HT (A11)	Unambiguous	GTGTANQcPTIDGGVDSFPFK	C8(Carbamidomethyl)	1	1	326487308	326487308	0	2	0.5479	0	1	1	1085.02	2169.02	2168.99	14.47	0.01569	294091	CID (Collision Induced Dissociation)	MS2		4.958	65.2227	21404	L_DC_WT_AB.raw	4.49	0	0.0002796
	High	Sequest HT (A11)	Unambiguous	GTGTANQcPTIDGGVDSFPFK	C8(Carbamidomethyl)	1	1	326487308	326487308	0	3	0.3326	0	1	1	724.008	2170.01	2168.99	469.5	0.33945	292245	CID (Collision Induced Dissociation)	MS2		5.442	65.4533	21494	L_DC_WT_AB.raw	4.63	0	0.0001861
	High	Sequest HT (A11)	Unambiguous	GTGTANQcPTIDGGVDSFPFK	C8(Carbamidomethyl)	1	1	326487308	326487308	0	3	0.0524	0	1	1	724.592	2171.76	2168.99	1276.34	0.92279	228740	CID (Collision Induced Dissociation)	MS2		4.166	63.9104	20900	L_DC_WT_AB.raw	2.86	0	0.003651
	High	Sequest HT (A11)	Unambiguous	NASSSTGNITLSVTK		1	1	326487308	326487308	0	2	0.4006	0	1	1	740.842	1480.68	1479.76	615.99	0.45576	104356	CID (Collision Induced Dissociation)	MS2		9.131	45.6253	13955	L_DC_WT_AB.raw	3.47	0.0002846	0.018
	High	Sequest HT (A11)	Unambiguous	NASSSTGNITLSVTK		1	1	326487308	326487308	0	2	0.2308	0	1	1	740.009	1479.01	1479.76	-510.34	-0.37759	42050.8	CID (Collision Induced Dissociation)	MS2		10.06	46.3847	14233	L_DC_WT_AB.raw	3.25	0.002443	0.05396
	High	Sequest HT (A11)	Unambiguous	KFcLEPTSFTVK	C3(Carbamidomethyl)	1	1	326487308	326487308	1	2	0.3603	0	1	1	729.342	1457.68	1456.75	635.34	0.46277	329947	CID (Collision Induced Dissociation)	MS2		5.575	52.6717	16580	L_DC_WT_AB.raw	3.83	0	0.001099
	High	Sequest HT (A11)	Unambiguous	IQGVWYAQLESN		1	1	326487308	326487308	0	2	0.172	0	1	1	704.091	1407.18	1407.69	-366.05	-0.25764	111697	CID (Collision Induced Dissociation)	MS2		37.154	112.333	38570	L_DC_WT_AB.raw	1.86	0.006259	0.1143
	High	Sequest HT (A11)	Unambiguous	LTYTLDEMEGPLEVGADGTLK		1	1	326487308	326487308	0	2	0.1644	0	1	1	1126.1	2251.19	2252.1	-403.58	-0.45445	103805	CID (Collision Induced Dissociation)	MS2		50	114.13	39234	L_DC_WT_AB.raw	2.19	0.006592	0.1194
High	Master Protein	326490876	Name:"Similar to TL20.3 Thylakoid lumenal protein TL20.3, chloroplastic (Arabidopsis thaliana OX=3702)"	0	49.059	56.1798	11	26	11	1	267	28	8.68	98.99	11
	Confidence	Identifying Node	PSM Ambiguity	Annotated Sequence	Modifications	# Protein Groups	# Proteins	Master Protein Accessions	Protein Accessions	# Missed Cleavages	Charge	DeltaScore	DeltaCn	Rank	Search Engine Rank	m/z [Da]	MH+ [Da]	Theo. MH+ [Da]	DeltaM [ppm]	Deltam/z [Da]	Intensity	Activation Type	MS Order	Isolation Interference [%]	Ion Inject Time [ms]	RT [min]	First Scan	Spectrum File	XCorr	Percolator q-Value	Percolator PEP
	High	Sequest HT (A11)	Unambiguous	MVLNEANLTNAVLSR		1	1	326490876	326490876	0	2	0.062	0	1	1	823.427	1645.85	1644.87	591.25	0.48627	89719.7	CID (Collision Induced Dissociation)	MS2		16.599	72.242	24097	L_DC_WT_AB.raw	2.74	0.003792	0.0786
	High	Sequest HT (A11)	Unambiguous	MVLNEANLTNAVLSR		1	1	326490876	326490876	0	2	0.5237	0	1	1	823.427	1645.85	1644.87	591.25	0.48627	237941	CID (Collision Induced Dissociation)	MS2		5.102	68.295	22592	L_DC_WT_AB.raw	5.27	0	1.247e-05
	High	Sequest HT (A11)	Unambiguous	MVLNEANLTNAVLSR		1	1	326490876	326490876	0	2	0.3951	0	1	1	822.927	1644.85	1644.87	-16.71	-0.01374	96350.6	CID (Collision Induced Dissociation)	MS2		9.934	69.1107	22904	L_DC_WT_AB.raw	4.48	0	1.049e-05
	High	Sequest HT (A11)	Unambiguous	SDLGGATIEGADFSDAVIDLPQK		1	1	326490876	326490876	0	2	0.3345	0	1	1	1159.1	2317.19	2319.14	-837.57	-0.97122	83201.8	CID (Collision Induced Dissociation)	MS2		37.014	78.8514	26584	L_DC_WT_AB.raw	2.96	0	0.0006183
	High	Sequest HT (A11)	Unambiguous	SDLGGATIEGADFSDAVIDLPQK		1	1	326490876	326490876	0	2	0.417	0	1	1	1161.02	2321.03	2319.14	815.38	0.94548	84991.7	CID (Collision Induced Dissociation)	MS2		19.232	79.024	26648	L_DC_WT_AB.raw	5.42	0	1.132e-05
	High	Sequest HT (A11)	Unambiguous	SDLGGATIEGADFSDAVIDLPQK		1	1	326490876	326490876	0	2	0.5545	0	1	1	1160.52	2320.03	2319.14	384.17	0.44547	125358	CID (Collision Induced Dissociation)	MS2		18.671	79.5443	26841	L_DC_WT_AB.raw	6.06	0	6.333e-06
	High	Sequest HT (A11)	Unambiguous	ESDFSGSTFNGAYmEK	M14(Oxidation)	1	1	326490876	326490876	0	2	0.3343	0	1	1	894.511	1788.02	1785.73	1281.55	1.14425	86820.8	CID (Collision Induced Dissociation)	MS2		33.358	41.8671	12577	L_DC_WT_AB.raw	3.53	0	0.004467
	High	Sequest HT (A11)	Unambiguous	ESDFSGSTFNGAYmEK	M14(Oxidation)	1	1	326490876	326490876	0	2	0.481	0	1	1	893.845	1786.68	1785.73	534.87	0.47757	89925.7	CID (Collision Induced Dissociation)	MS2		24.662	42.0592	12645	L_DC_WT_AB.raw	3.95	0	0.0001206
	High	Sequest HT (A11)	Unambiguous	DGFcDEASGLcDAK	C4(Carbamidomethyl); C11(Carbamidomethyl)	1	1	326490876	326490876	0	2	0.5186	0	1	1	772.842	1544.68	1544.6	50.82	0.03925	126647	CID (Collision Induced Dissociation)	MS2		7.07	42.9833	12984	L_DC_WT_AB.raw	3.49	0	0.0009108
	High	Sequest HT (A11)	Unambiguous	ANFTSADMR		1	1	326490876	326490876	0	2	0.3542	0	1	1	506.754	1012.5	1012.45	48.46	0.02453	207422	CID (Collision Induced Dissociation)	MS2		5.847	25.1586	6502	L_DC_WT_AB.raw	2.4	0	0.006981
	High	Sequest HT (A11)	Unambiguous	YASGTNPITGVSTR		1	1	326490876	326490876	0	2	0.4492	0	1	1	712.341	1423.68	1423.72	-29.67	-0.02112	215372	CID (Collision Induced Dissociation)	MS2		9.479	33.8095	9616	L_DC_WT_AB.raw	3.74	0	0.0002605
	High	Sequest HT (A11)	Unambiguous	ANFTGADLSDTLMDR		1	1	326490876	326490876	0	2	0.2491	0	1	1	815.093	1629.18	1626.74	1497.78	1.21825	75542	CID (Collision Induced Dissociation)	MS2		20.1	63.4546	20728	L_DC_WT_AB.raw	2.69	0	0.0009146
	High	Sequest HT (A11)	Unambiguous	GEFGIGSAAQFGNADLK		1	1	326490876	326490876	0	2	0.4316	0	1	1	842.01	1683.01	1681.82	710.94	0.59783	76610.3	CID (Collision Induced Dissociation)	MS2		19.417	63.5432	20762	L_DC_WT_AB.raw	4.31	0	0.0001959
	High	Sequest HT (A11)	Unambiguous	ANFTGADLSDTLMDR		1	1	326490876	326490876	0	2	0.4255	0	1	1	814.343	1627.68	1626.74	575.67	0.46824	338832	CID (Collision Induced Dissociation)	MS2		3.643	63.6248	20793	L_DC_WT_AB.raw	3.69	0	0.0002783
	High	Sequest HT (A11)	Selected	yEADQRGEFGIGSAAQFGNADLK	Y1(Phospho)	1	1	326490876	326490876	1	3	0.0436	0	1	1	841.844	2523.52	2524.11	-236.57	-0.19905	263140	CID (Collision Induced Dissociation)	MS2		8.081	62.0373	20180	L_DC_WT_AB.raw	2.98	0.003091	0.05878
	High	Sequest HT (A11)	Unambiguous	ANFTGADLSDTLMDR		1	1	326490876	326490876	0	2	0.4876	0	1	1	813.927	1626.85	1626.74	63.39	0.05156	334948	CID (Collision Induced Dissociation)	MS2		3.805	63.9552	20918	L_DC_WT_AB.raw	4.45	0	3.59e-05
	High	Sequest HT (A11)	Unambiguous	GEFGIGSAAQFGNADLK		1	1	326490876	326490876	0	2	0.5079	0	1	1	841.844	1682.68	1681.82	512.73	0.43116	263140	CID (Collision Induced Dissociation)	MS2		8.081	62.0373	20180	L_DC_WT_AB.raw	5.73	0	5.894e-06
	High	Sequest HT (A11)	Unambiguous	GEFGIGSAAQFGNADLK		1	1	326490876	326490876	0	2	0.2	0	1	1	842.427	1683.85	1681.82	1206.44	1.01451	126210	CID (Collision Induced Dissociation)	MS2		9.42	61.7255	20062	L_DC_WT_AB.raw	3.15	0.0002846	0.01619
	High	Sequest HT (A11)	Unambiguous	NAYGSPSSPLLSAPPPK		1	1	326490876	326490876	0	2	0.4262	0	1	1	842.427	1683.85	1682.87	577.72	0.48611	81315	CID (Collision Induced Dissociation)	MS2		10.96	46.8121	14390	L_DC_WT_AB.raw	3.66	0	0.002371
	High	Sequest HT (A11)	Unambiguous	NAYGSPSSPLLSAPPPK		1	1	326490876	326490876	0	2	0.5279	0	1	1	842.344	1683.68	1682.87	478.68	0.40278	85770.9	CID (Collision Induced Dissociation)	MS2		14.702	47.1486	14517	L_DC_WT_AB.raw	3.94	0	0.0001387
	High	Sequest HT (A11)	Unambiguous	NAYGSPSSPLLSAPPPK		1	1	326490876	326490876	0	2	0.0612	0	1	1	841.51	1682.01	1682.87	-511.71	-0.43057	68035	CID (Collision Induced Dissociation)	MS2		21.49	47.2158	14541	L_DC_WT_AB.raw	2.78	0	0.0001168
	High	Sequest HT (A11)	Unambiguous	LLDRDGFcDEASGLcDAK	C8(Carbamidomethyl); C15(Carbamidomethyl)	1	1	326490876	326490876	1	2	0.3905	0	1	1	1020.6	2040.19	2041.9	-836.53	-0.85405	75153.8	CID (Collision Induced Dissociation)	MS2		28.78	47.8462	14775	L_DC_WT_AB.raw	2.74	0	0.004763
	High	Sequest HT (A11)	Unambiguous	ESDFSGSTFNGAYMEK		1	1	326490876	326490876	0	2	0.2696	0	1	1	886.428	1771.85	1769.73	1195.91	1.05822	52812.9	CID (Collision Induced Dissociation)	MS2		44.71	49.3409	15332	L_DC_WT_AB.raw	3.19	0	0.0001498
	High	Sequest HT (A11)	Unambiguous	ESDFSGSTFNGAYMEK		1	1	326490876	326490876	0	2	0.4713	0	1	1	885.845	1770.68	1769.73	536.66	0.47487	263810	CID (Collision Induced Dissociation)	MS2		8.341	50.0436	15590	L_DC_WT_AB.raw	4.18	0	7.659e-06
	High	Sequest HT (A11)	Unambiguous	ANFTGADLSDTLmDR	M13(Oxidation)	1	1	326490876	326490876	0	2	0.4654	0	1	1	822.343	1643.68	1642.74	573.35	0.47093	127398	CID (Collision Induced Dissociation)	MS2		6.857	55.2486	17559	L_DC_WT_AB.raw	3.76	0	0.000124
	High	Sequest HT (A11)	Unambiguous	ANFTGADLSDTLmDR	M13(Oxidation)	1	1	326490876	326490876	0	2	0.3865	0	1	1	821.76	1642.51	1642.74	-136.86	-0.11241	138787	CID (Collision Induced Dissociation)	MS2		7.522	55.293	17576	L_DC_WT_AB.raw	3.7	0	0.0003187
High	Master Protein	326526529	Name:"Protein of unknown function"	0	47.201	42.5703	11	32	11	1	249	28.3	6.65	98.02	11
	Confidence	Identifying Node	PSM Ambiguity	Annotated Sequence	Modifications	# Protein Groups	# Proteins	Master Protein Accessions	Protein Accessions	# Missed Cleavages	Charge	DeltaScore	DeltaCn	Rank	Search Engine Rank	m/z [Da]	MH+ [Da]	Theo. MH+ [Da]	DeltaM [ppm]	Deltam/z [Da]	Intensity	Activation Type	MS Order	Isolation Interference [%]	Ion Inject Time [ms]	RT [min]	First Scan	Spectrum File	XCorr	Percolator q-Value	Percolator PEP
	High	Sequest HT (A11)	Unambiguous	NELNmSILTLLDENIGSAK	M5(Oxidation)	1	1	326526529	326526529	0	2	0.3561	0	1	1	1045.76	2090.52	2091.06	-259.31	-0.27112	42853.2	CID (Collision Induced Dissociation)	MS2		30.695	90.8133	30989	L_DC_WT_AB.raw	3.96	0	1.89e-05
	High	Sequest HT (A11)	Unambiguous	NELNMSILTLLDENIGSAK		1	1	326526529	326526529	0	3	0.4675	0	1	1	692.341	2075.01	2075.07	-29.24	-0.02023	77280.2	CID (Collision Induced Dissociation)	MS2		29.457	95.002	32503	L_DC_WT_AB.raw	4	0	0.001138
	High	Sequest HT (A11)	Unambiguous	NELNMSILTLLDENIGSAK		1	1	326526529	326526529	0	2	0.611	0	1	1	1037.93	2074.85	2075.07	-103.27	-0.10715	65961.2	CID (Collision Induced Dissociation)	MS2		21.371	95.3419	32625	L_DC_WT_AB.raw	5.45	0	6.43e-06
	High	Sequest HT (A11)	Unambiguous	tLLDMVERNELNMSILTLLDENIGSAK	T1(Phospho)	1	1	326526529	326526529	1	3	0.0515	0	1	1	1037.93	3111.78	3112.53	-241.71	-0.25077	65961.2	CID (Collision Induced Dissociation)	MS2		21.371	95.3419	32625	L_DC_WT_AB.raw	2.91	0.002443	0.05112
	High	Sequest HT (A11)	Unambiguous	NELNMSILTLLDENIGSAK		1	1	326526529	326526529	0	2	0.1491	0	1	1	1037.01	2073.02	2075.07	-986.79	-1.02383	64261.8	CID (Collision Induced Dissociation)	MS2		14.337	95.5475	32698	L_DC_WT_AB.raw	3.42	0	2.217e-05
	High	Sequest HT (A11)	Unambiguous	VIPETDAGLVEFFLDTDAR		1	1	326526529	326526529	0	3	0.24	0	1	1	703.508	2108.51	2108.05	215.48	0.15141	40709.5	CID (Collision Induced Dissociation)	MS2		42.771	96.0095	32864	L_DC_WT_AB.raw	3.5	0	0.001
	High	Sequest HT (A11)	Unambiguous	VIPETDAGLVEFFLDTDAR		1	1	326526529	326526529	0	2	0.4936	0	1	1	1054.43	2107.86	2108.05	-94.58	-0.09969	55324	CID (Collision Induced Dissociation)	MS2		13.491	96.207	32935	L_DC_WT_AB.raw	3.91	0	8.717e-05
	High	Sequest HT (A11)	Unambiguous	VIPETDAGLVEFFLDTDAR		1	1	326526529	326526529	0	2	0.6	0	1	1	1053.93	2106.86	2108.05	-568.96	-0.5997	24871.5	CID (Collision Induced Dissociation)	MS2		12.799	97.082	33246	L_DC_WT_AB.raw	3.65	0	1.436e-05
	High	Sequest HT (A11)	Unambiguous	NELNmSILTLLDENIGSAK	M5(Oxidation)	1	1	326526529	326526529	0	2	0.2985	0	1	1	1046.43	2091.85	2091.06	378.33	0.39556	88489	CID (Collision Induced Dissociation)	MS2		11.87	90.4427	30855	L_DC_WT_AB.raw	4.12	0	1.313e-05
	High	Sequest HT (A11)	Unambiguous	VIPETDAGLVEFFLDTDAR		1	1	326526529	326526529	0	3	0.2295	0	1	1	703.424	2108.26	2108.05	96.88	0.06808	39000	CID (Collision Induced Dissociation)	MS2		34.581	97.9566	33558	L_DC_WT_AB.raw	3.05	0	0.003998
	High	Sequest HT (A11)	Selected	NELNmSILTLLDENIGSAK	M5(Oxidation)	1	1	326526529	326526529	0	2		0.0176	2	2	1047.35	2093.69	2091.06	1255.1	1.31224	56847.6	CID (Collision Induced Dissociation)	MS2		15.869	90.051	30712	L_DC_WT_AB.raw	2.23	0.005357	0.09735
	High	Sequest HT (A11)	Unambiguous	ASNQEEAVAFmEDVR	M11(Oxidation)	1	1	326526529	326526529	0	2	0.4891	0	1	1	856.344	1711.68	1711.76	-45.73	-0.03914	67477.7	CID (Collision Induced Dissociation)	MS2		35.217	41.1273	12306	L_DC_WT_AB.raw	4.58	0	0.0003589
	High	Sequest HT (A11)	Unambiguous	AAFDLQVK		1	1	326526529	326526529	0	2	0.3502	0	1	1	446.336	891.665	891.493	192.49	0.0858	587734	CID (Collision Induced Dissociation)	MS2		2.241	41.5427	12458	L_DC_WT_AB.raw	2.37	0.001031	0.03229
	High	Sequest HT (A11)	Unambiguous	ASNQEEAVAFmEDVR	M11(Oxidation)	1	1	326526529	326526529	0	2	0.1822	0	1	1	856.427	1711.85	1711.76	51.64	0.0442	77502.5	CID (Collision Induced Dissociation)	MS2		19.691	42.7092	12883	L_DC_WT_AB.raw	2.69	0	0.01008
	High	Sequest HT (A11)	Unambiguous	LQNDLVTAK		1	1	326526529	326526529	0	2	0.2944	0	1	1	501.254	1001.5	1001.56	-61.98	-0.03104	106437	CID (Collision Induced Dissociation)	MS2		6.913	24.2387	6180	L_DC_WT_AB.raw	2.48	0.003792	0.07965
	High	Sequest HT (A11)	Unambiguous	LTNILQSK		1	1	326526529	326526529	0	2	0.1463	0	1	1	459.336	917.666	916.546	1221.27	0.55967	229050	CID (Collision Induced Dissociation)	MS2		3.11	31.1436	8643	L_DC_WT_AB.raw	2.46	0.0002846	0.02841
	High	Sequest HT (A11)	Unambiguous	LTNILQSK		1	1	326526529	326526529	0	2	0.2922	0	1	1	458.253	915.499	916.546	-1142.73	-0.52368	172927	CID (Collision Induced Dissociation)	MS2		1.753	31.5391	8789	L_DC_WT_AB.raw	2.19	0.0002846	0.02455
	High	Sequest HT (A11)	Unambiguous	VIGEGVEAYDK		1	1	326526529	326526529	0	2	0.4114	0	1	1	590.256	1179.5	1179.59	-72.27	-0.04262	280615	CID (Collision Induced Dissociation)	MS2		5.722	32.0775	8985	L_DC_WT_AB.raw	3.16	0	0.002413
	High	Sequest HT (A11)	Unambiguous	VIGEGVEAYDK		1	1	326526529	326526529	0	2	0.2231	0	1	1	589.422	1177.84	1179.59	-1485.21	-0.87597	110047	CID (Collision Induced Dissociation)	MS2		5.506	32.5759	9169	L_DC_WT_AB.raw	2.42	0.0002846	0.01728
	High	Sequest HT (A11)	Unambiguous	LTNILQSK		1	1	326526529	326526529	0	2	0.114	0	1	1	459.336	917.666	916.546	1221.27	0.55967	168208	CID (Collision Induced Dissociation)	MS2		7.361	33.0147	9328	L_DC_WT_AB.raw	2.28	0.001031	0.03396
	High	Sequest HT (A11)	Unambiguous	LIELEAmQK	M7(Oxidation)	1	1	326526529	326526529	0	2	0.2479	0	1	1	546.421	1091.84	1090.58	1150.14	0.62716	176618	CID (Collision Induced Dissociation)	MS2		4.196	33.2608	9417	L_DC_WT_AB.raw	2.38	0.003266	0.06312
	High	Sequest HT (A11)	Unambiguous	LTNILQSK		1	1	326526529	326526529	0	1	0.1266	0	1	1	916.762	916.762	916.546	235.36	0.21572	37804.6	CID (Collision Induced Dissociation)	MS2		34.978	31.3233	8712	L_DC_WT_AB.raw	2.37	0.003091	0.05957
	High	Sequest HT (A11)	Unambiguous	LIELEAMQK		1	1	326526529	326526529	0	2	0.1238	0	1	1	537.838	1074.67	1074.59	76.52	0.04112	130069	CID (Collision Induced Dissociation)	MS2		6.819	45.2336	13809	L_DC_WT_AB.raw	2.1	0.003266	0.06738
	High	Sequest HT (A11)	Unambiguous	ASNQEEAVAFMEDVR		1	1	326526529	326526529	0	2	0.4513	0	1	1	847.344	1693.68	1695.76	-1228.77	-1.04186	124236	CID (Collision Induced Dissociation)	MS2		8.123	62.4181	20328	L_DC_WT_AB.raw	3.59	0	0.0002074
	High	Sequest HT (A11)	Unambiguous	ASNQEEAVAFMEDVR		1	1	326526529	326526529	0	3	0.1181	0	1	1	566.255	1696.75	1695.76	581.82	0.32887	92952.7	CID (Collision Induced Dissociation)	MS2		6.923	62.4808	20353	L_DC_WT_AB.raw	2.88	0	0.001439
	High	Sequest HT (A11)	Unambiguous	VIGEGVEAYDKLQNDLVTAK		1	1	326526529	326526529	1	3	0.375	0	1	1	721.841	2163.51	2162.13	636.4	0.45866	262493	CID (Collision Induced Dissociation)	MS2		5.285	62.7334	20450	L_DC_WT_AB.raw	3.28	0	0.001667
	High	Sequest HT (A11)	Unambiguous	VIGEGVEAYDKLQNDLVTAK		1	1	326526529	326526529	1	3	0.3768	0	1	1	720.841	2160.51	2162.13	-751.14	-0.54136	130705	CID (Collision Induced Dissociation)	MS2		9.867	63.4845	20739	L_DC_WT_AB.raw	3.45	0	0.006732
	High	Sequest HT (A11)	Unambiguous	ASNQEEAVAFMEDVR		1	1	326526529	326526529	0	2	0.39	0	1	1	848.427	1695.85	1695.76	48.94	0.0415	518362	CID (Collision Induced Dissociation)	MS2		2.73	61.8011	20090	L_DC_WT_AB.raw	4.18	0	0.001082
	High	Sequest HT (A11)	Unambiguous	LIELEAMQK		1	1	326526529	326526529	0	2	0.2317	0	1	1	537.671	1074.34	1074.59	-233.68	-0.12555	95503.4	CID (Collision Induced Dissociation)	MS2		7.873	46.9476	14441	L_DC_WT_AB.raw	2.46	0.001031	0.03311
	High	Sequest HT (A11)	Unambiguous	TLLDMVER		1	1	326526529	326526529	0	2	0.0936	0	1	1	488.754	976.5	976.513	-13.48	-0.00658	184598	CID (Collision Induced Dissociation)	MS2		9.414	57.0083	18240	L_DC_WT_AB.raw	1.71	0.0002846	0.02633
	High	Sequest HT (A11)	Unambiguous	TLLDMVER		1	1	326526529	326526529	0	2	0.2311	0	1	1	489.17	977.333	976.513	839.91	0.41009	109290	CID (Collision Induced Dissociation)	MS2		11.973	58.5006	18818	L_DC_WT_AB.raw	2.25	0.001031	0.0383
	High	Sequest HT (A11)	Selected	ASNQEEAVAFMEDVR		1	1	326526529	326526529	0	2		0.0118	2	2	849.427	1697.85	1695.76	1228.38	1.04152	184935	CID (Collision Induced Dissociation)	MS2		2.79	61.5727	20003	L_DC_WT_AB.raw	2.52	0	0.01231
High	Master Protein	326509461	Name:"Similar to PETF Ferredoxin, chloroplastic (Triticum aestivum OX=4565)"	0	12.137	89.011	3	12	3	1	91	10	3.98	34.36	3
	Confidence	Identifying Node	PSM Ambiguity	Annotated Sequence	Modifications	# Protein Groups	# Proteins	Master Protein Accessions	Protein Accessions	# Missed Cleavages	Charge	DeltaScore	DeltaCn	Rank	Search Engine Rank	m/z [Da]	MH+ [Da]	Theo. MH+ [Da]	DeltaM [ppm]	Deltam/z [Da]	Intensity	Activation Type	MS Order	Isolation Interference [%]	Ion Inject Time [ms]	RT [min]	First Scan	Spectrum File	XCorr	Percolator q-Value	Percolator PEP
	High	Sequest HT (A11)	Unambiguous	LVTPEGEVELEVPDDVYILDQAEEEGIDLPYScR	C33(Carbamidomethyl)	1	3	326509461	34921267; 228308; 326509461	0	3	0.2479	0	1	1	1298.19	3892.54	3891.84	181.54	0.23551	70065.5	CID (Collision Induced Dissociation)	MS2		22.275	98.7769	33850	L_DC_WT_AB.raw	3.55	0	0.007456
	High	Sequest HT (A11)	Selected	LVTPEGEVELEVPDDVyILDQAEEEGIDLPYSCR	Y17(Phospho)	1	3	326509461	34921267; 228308; 326509461	0	3		0.0287	3	3	1306.35	3917.04	3914.78	577.84	0.75405	56976.6	CID (Collision Induced Dissociation)	MS2		29.482	99.1818	33992	L_DC_WT_AB.raw	3.38	0	0.009291
	High	Sequest HT (A11)	Unambiguous	LVTPEGEVELEVPDDVyILDQAEEEGIDLPYSCR	Y17(Phospho)	1	3	326509461	34921267; 228308; 326509461	0	3	0.0152	0	1	1	1305.94	3915.79	3914.78	258.54	0.33737	58257.1	CID (Collision Induced Dissociation)	MS2		40.113	99.3025	34035	L_DC_WT_AB.raw	3.29	0	0.003868
	High	Sequest HT (A11)	Unambiguous	LVTPEGEVELEVPDDVYILDQAEEEGIDLPySCR	Y31(Phospho)	1	3	326509461	34921267; 228308; 326509461	0	3		0.0152	2	2	1305.94	3915.79	3914.78	258.54	0.33737	58257.1	CID (Collision Induced Dissociation)	MS2		40.113	99.3025	34035	L_DC_WT_AB.raw	3.24	0	0.002847
	High	Sequest HT (A11)	Unambiguous	LVTPEGEVELEVPDDVYILDQAEEEGIDLPYsCR	S32(Phospho)	1	3	326509461	34921267; 228308; 326509461	0	3		0.0243	3	3	1305.94	3915.79	3914.78	258.54	0.33737	58257.1	CID (Collision Induced Dissociation)	MS2		40.113	99.3025	34035	L_DC_WT_AB.raw	3.21	0	0.003354
	High	Sequest HT (A11)	Unambiguous	LVTPEGEVELEVPDDVYILDQAEEEGIDLPYScR	C33(Carbamidomethyl)	1	3	326509461	34921267; 228308; 326509461	0	3	0.0952	0	1	1	1298.85	3894.54	3891.84	695.45	0.90219	109024	CID (Collision Induced Dissociation)	MS2		7.032	100.281	34382	L_DC_WT_AB.raw	3.57	0	0.0003911
	High	Sequest HT (A11)	Selected	LVTPEGEVELEVPDDVYILDQAEEEGIDLPYScR	C33(Carbamidomethyl)	1	3	326509461	34921267; 228308; 326509461	0	3	0.0209	0	1	1	1298.19	3892.54	3891.84	181.54	0.23551	59236.5	CID (Collision Induced Dissociation)	MS2		19.413	100.867	34588	L_DC_WT_AB.raw	3.35	0	0.002053
	High	Sequest HT (A11)	Unambiguous	LVTPEGEVELEVPDDVYILDQAEEEGIDLPYScR	C33(Carbamidomethyl)	1	3	326509461	34921267; 228308; 326509461	0	3	0.2453	0	1	1	1298.69	3894.04	3891.84	566.97	0.73552	66825.2	CID (Collision Induced Dissociation)	MS2		28.198	98.72	33829	L_DC_WT_AB.raw	3.75	0.0002846	0.02067
	High	Sequest HT (A11)	Unambiguous	LVSGEIDQSDQSFLDDDQmEAGWVLTcHAYPK	M19(Oxidation); C27(Carbamidomethyl)	1	1	326509461	326509461	0	3	0.2062	0	1	1	1224.27	3670.79	3670.63	43.01	0.05262	82504.5	CID (Collision Induced Dissociation)	MS2		22.473	77.807	26196	L_DC_WT_AB.raw	3.88	0	0.003977
	High	Sequest HT (A11)	Unambiguous	SDIVIETHKEEELTA		1	1	326509461	326509461	1	2	0.373	0	1	1	857.927	1714.85	1713.85	579.69	0.49675	548207	CID (Collision Induced Dissociation)	MS2		2.888	38.9053	11487	L_DC_WT_AB.raw	3.78	0	0.004789
	High	Sequest HT (A11)	Unambiguous	SDIVIETHKEEELTA		1	1	326509461	326509461	1	3	0.2428	0	1	1	572.339	1715	1713.85	669.32	0.38237	2361380	CID (Collision Induced Dissociation)	MS2		0.413	39.2932	11630	L_DC_WT_AB.raw	2.43	0.004583	0.09036
	High	Sequest HT (A11)	Unambiguous	SDIVIETHKEEELTA		1	1	326509461	326509461	1	2	0.497	0	1	1	856.427	1711.85	1713.85	-1170.79	-1.00328	42708.5	CID (Collision Induced Dissociation)	MS2		47.725	39.6126	11751	L_DC_WT_AB.raw	3.38	0	0.001821
High	Master Protein	326491001	Name:"Similar to CPN60II Chaperonin CPN60-2, mitochondrial (Zea mays OX=4577)"	0	3.493	4.18118	2	3	2	1	574	61	5.55	7.25	2
	Confidence	Identifying Node	PSM Ambiguity	Annotated Sequence	Modifications	# Protein Groups	# Proteins	Master Protein Accessions	Protein Accessions	# Missed Cleavages	Charge	DeltaScore	DeltaCn	Rank	Search Engine Rank	m/z [Da]	MH+ [Da]	Theo. MH+ [Da]	DeltaM [ppm]	Deltam/z [Da]	Intensity	Activation Type	MS Order	Isolation Interference [%]	Ion Inject Time [ms]	RT [min]	First Scan	Spectrum File	XCorr	Percolator q-Value	Percolator PEP
	High	Sequest HT (A11)	Unambiguous	GYISPyFVTNQK	Y6(Phospho)	1	1	326491001	326491001	0	2	0.1	0	1	1	748.925	1496.84	1496.68	107.77	0.08065	181690	CID (Collision Induced Dissociation)	MS2		10.674	63.5365	20759	L_DC_WT_AB.raw	2.2	0.003266	0.06268
	High	Sequest HT (A11)	Unambiguous	TVIIEQSFGAPK		1	1	326491001	326491001	0	2	0.1992	0	1	1	645.673	1290.34	1289.71	488.06	0.31472	120397	CID (Collision Induced Dissociation)	MS2		13.107	46.9265	14434	L_DC_WT_AB.raw	2.36	0.001269	0.04589
	High	Sequest HT (A11)	Unambiguous	TVIIEQSFGAPK		1	1	326491001	326491001	0	2	0.1338	0	1	1	645.173	1289.34	1289.71	-287.33	-0.18528	71424.3	CID (Collision Induced Dissociation)	MS2		15.88	47.2399	14549	L_DC_WT_AB.raw	2.69	0	0.005126
High	Master Protein	326493522	Name:"Similar to Phosphoglycerate kinase, cytosolic (Triticum aestivum OX=4565)"	0.005	1.31	5.98504	1	2	1	1	401	42.1	6.23	2.84	1
	Confidence	Identifying Node	PSM Ambiguity	Annotated Sequence	Modifications	# Protein Groups	# Proteins	Master Protein Accessions	Protein Accessions	# Missed Cleavages	Charge	DeltaScore	DeltaCn	Rank	Search Engine Rank	m/z [Da]	MH+ [Da]	Theo. MH+ [Da]	DeltaM [ppm]	Deltam/z [Da]	Intensity	Activation Type	MS Order	Isolation Interference [%]	Ion Inject Time [ms]	RT [min]	First Scan	Spectrum File	XCorr	Percolator q-Value	Percolator PEP
	High	Sequest HT (A11)	Unambiguous	LADITAQGVtTIIGGGDSVAAVEK	T10(Phospho)	1	1	326493522	326493522	0	3	0.0141	0	1	1	788.509	2363.51	2366.19	-1128.94	-0.89042	83464	CID (Collision Induced Dissociation)	MS2		17.687	52.1208	16376	L_DC_WT_AB.raw	2.84	0.003792	0.07853
	High	Sequest HT (A11)	Unambiguous	LADITAQGVTtIIGGGDSVAAVEK	T11(Phospho)	1	1	326493522	326493522	0	3		0.0141	2	2	788.509	2363.51	2366.19	-1128.94	-0.89042	83464	CID (Collision Induced Dissociation)	MS2		17.687	52.1208	16376	L_DC_WT_AB.raw	2.8	0.001995	0.04893
High	Master Protein	326506686	Name:"Similar to MAPK6 Mitogen-activated protein kinase 6 (Homo sapiens OX=9606)"	0.003	1.379	3.11355	1	1	1	1	546	58.7	5.86	2.23	1
	Confidence	Identifying Node	PSM Ambiguity	Annotated Sequence	Modifications	# Protein Groups	# Proteins	Master Protein Accessions	Protein Accessions	# Missed Cleavages	Charge	DeltaScore	DeltaCn	Rank	Search Engine Rank	m/z [Da]	MH+ [Da]	Theo. MH+ [Da]	DeltaM [ppm]	Deltam/z [Da]	Intensity	Activation Type	MS Order	Isolation Interference [%]	Ion Inject Time [ms]	RT [min]	First Scan	Spectrum File	XCorr	Percolator q-Value	Percolator PEP
	High	Sequest HT (A11)	Unambiguous	VLWTsEAFAEGSEVAPR	S5(Phospho)	1	1	326506686	326506686	0	3	0.0583	0	1	1	643.923	1929.76	1928.88	454.37	0.29214	13584.2	CID (Collision Induced Dissociation)	MS2		50	19.0821	4460	L_DC_WT_AB.raw	2.23	0.001031	0.04175

[truncated: 3 more sheets: SHOOT KO_replicate 1, SHOOT KO_replicate 2, SHOOT KO_replicate 3]
