# Supplementary material for: TALEN-Based HvMPK3 Knock-Out Attenuates Proteome and Root Hair Phenotypic Responses to flg22 in Barley
Source: Front Plant Sci. 2021 Apr 29;12:666229. doi: 10.3389/fpls.2021.666229 (PMC8117018; doi:10.3389/fpls.2021.666229)
Supplement: Supplementary Data Sheet 4 — Differentially regulated proteins found between controls and flg22-treated roots of barley wild type lines and their bioinformatic evaluation. [file Data_Sheet_4.xlsx]

## Sheet: Datasheet 4A_List
Data sheet 4A. Summary of differentialy regulated proteins found between mock treated and flg22-treated roots of barley WT lines.
Accession	MW [kDa]	calc. pI	Description	Ratio (FLG22 vs control)	P-value	Mean (flg22 treated)	Variance (flg22 treated)	Mean (control)	Variance (control)
			Metabolism
326512666	15.4	5.3	Name:"Similar to Os05g0108800 Cytochrome b5 (Oryza sativa subsp. japonica OX=39947)"	1.86436	0.0040179	407332	9.97013e+06	218484	9.877e+08
326496747	37.2	5.6	Name:"Similar to AKR1 Probable aldo-keto reductase 1 (Glycine max OX=3847)"	3.53985	0.0084614	559385	7.38399e+09	158025	3.30023e+08
326510533	54.3	6.07	Name:"Similar to Aldehyde dehydrogenase family 7 member A1 (Malus domestica OX=3750)"	2.33206	0.036062	684647	3.06996e+10	293581	5.57297e+09
326533446	32.4	7.77	Name:"Similar to GLY3 Persulfide dioxygenase ETHE1 homolog, mitochondrial (Arabidopsis thaliana OX=3702)"	2.48539	0.040338	370174	2.34927e+09	148940	9.93214e+09
21396683	31.3	5.01	3-phosphoglycerate kinase, partial [Hordeum vulgare subsp. vulgare]	2.95093	0.031118	1.39892e+06	2.07862e+11	474059	3.37718e+10
400177396	68.7	5.44	sucrose:fructan 6-fructosyltransferase [Hordeum vulgare subsp. vulgare]	0.639328	0.0062442	733752	8.21098e+09	1.14769e+06	1.0358e+10
326513012	46.3	6.3	Name:"Similar to tal1 Transaldolase 1 (Streptomyces avermitilis (strain ATCC 31267 / DSM 46492 / JCM 5070 / NBRC 14893 / NCIMB 12804 / NRRL 8165 / MA-4680) OX=227882)"	0.600661	0.036425	1.5388e+06	1.53057e+10	2.56185e+06	3.12672e+11
326502492	112.8	6.3	Name:"Similar to At3g26720 Alpha-mannosidase At3g26720 (Arabidopsis thaliana OX=3702)"	1.81767	0.035705	582833	9.25598e+09	320648	1.2001e+10
326531082	55.6	8.68	Name:"Similar to Citrate synthase, glyoxysomal (Cucurbita maxima OX=3661)"	0.152479	0.0092574	75082.6	1.77195e+09	492412	7.81022e+09
			Protein degradation and processing
1706082	55.9	5.64	RecName: Full=Serine carboxypeptidase II-3; AltName: Full=CP-MII.3; Contains: RecName: Full=Serine carboxypeptidase II-3 chain A; Contains: RecName: Full=Serine carboxypeptidase II-3 chain B; Flags: Precursor	2.17658	0.041484	366397	1.72458e+09	168336	5.13374e+09
300568842	31.2	5.31	Name:"Similar to PAF1 Proteasome subunit alpha type-1 (Oryza sativa subsp. japonica OX=39947)"	2.75685	0.020257	978407	7.88767e+10	354901	4.84309e+09
326512622	88.2	6.01	Name:"Similar to OOP Organellar oligopeptidase A, chloroplastic/mitochondrial (Arabidopsis thaliana OX=3702)"	0.442561	0.038544	227920	1.51059e+10	515002	1.17162e+10
326527513	45.7	6.07	Name:"Similar to RPT3 26S proteasome regulatory subunit 6B homolog (Arabidopsis thaliana OX=3702)"	0.215383	0.029423	82290.6	2.39307e+09	382067	2.20913e+10
			Abiotic stress response
296510307	28.6	7.96	Name:"Similar to Pyrroline-5-carboxylate reductase (Glycine max OX=3847)"	2.26855	0.031184	189465	1.32524e+09	83518.2	9.24849e+07
326498675	27.3	5.12	Name:"Similar to PHOS34 Universal stress protein PHOS34 (Arabidopsis thaliana OX=3702)"	0.279926	0.0539	108437	1.78263e+09	387379	7.33556e+09
326530940	28.1	5.85	Name:"Similar to Phosphomannomutase (Triticum aestivum OX=4565)"	0.435076	0.040044	72732.6	2.72688e+08	167172	1.1891e+09
115334277	30.4	7.83	aquaporin [Hordeum vulgare]	0.323071	0.033816	344272	2.812e+09	1.06562e+06	6.62843e+10
			Transport, targeting
326491175	77.6	7.11	Name:"Similar to ABCF4 ABC transporter F family member 4 (Arabidopsis thaliana OX=3702)"	1.46834	0.027558	248171	4.39488e+07	169014	3.16172e+08
23304413	20.7	6.95	ADP-ribosylation factor 1-like protein [Hordeum vulgare subsp. vulgare]	0.45214	0.047342	441956	9.55847e+10	977476	1.18366e+10
326494030	28.7	9.8	Name:"Similar to VHA-D V-type proton ATPase subunit D (Arabidopsis thaliana OX=3702)"	0.331156	0.023578	271496	2.03024e+09	819843	2.86698e+10
			Translation
326498985	16.8	10.67	Name:"Similar to RPS16A 40S ribosomal protein S16 (Oryza sativa subsp. japonica OX=39947)"	Unique in control	NA	0	0	521690	2.86095e+10
326493824	31.9	4.64	Name:"Similar to CP31A 31 kDa ribonucleoprotein, chloroplastic (Arabidopsis thaliana OX=3702)"	1.74797	0.042879	319081	1.64683e+09	182543	6.09553e+07
326531610	57.6	8.56	Name:"Similar to EIF4B Eukaryotic translation initiation factor 4B1 (Triticum aestivum OX=4565)"	Unique in flg22	NA	203768	4.19044e+07	0	0
326533694	41.4	8.5	Name:"Similar to EFTS Elongation factor Ts, mitochondrial (Oryza sativa subsp. japonica OX=39947)"	2.49906	0.030982	299640	7.85137e+09	119901	1.24963e+09
227304506	29.9	10.15	Name:"Similar to RPS4 40S ribosomal protein S4 (Oryza sativa subsp. japonica OX=39947)"	0.65217	0.02302	1.28854e+06	2.505e+10	1.97578e+06	8.50584e+10
326514788	31.3	7.03	Name:"Similar to eif3g Eukaryotic translation initiation factor 3 subunit G (Danio rerio OX=7955)"	2.35106	0.02032	403505	6.40357e+09	171627	1.54791e+09
326516494	23.5	10.39	Name:"Similar to RPL13AD 60S ribosomal protein L13a-4 (Arabidopsis thaliana OX=3702)"	0.399819	0.026421	164773	2.70069e+09	412119	6.65113e+08
			Protein folding
326526175	26	6.61	Name:"Similar to CPN20 20 kDa chaperonin, chloroplastic (Arabidopsis thaliana OX=3702)"	1.48882	0.0087235	1.06185e+06	7.05811e+09	713218	8.85019e+09
326518362	61.4	6.74	Name:"Similar to At3g13860 Chaperonin CPN60-like 2, mitochondrial (Arabidopsis thaliana OX=3702)"	0.41203	0.008879	351237	2.05787e+10	852455	1.26259e+10
			defense response
326506982	91.7	6.48	Name:"Similar to Os03g0255100 Beta-galactosidase 6 (Oryza sativa subsp. japonica OX=39947)"	0.43475	0.045703	175411	8.93147e+08	403476	4.20847e+09
326491407	36	7.8	Name:"Similar to PER72 Peroxidase 72 (Arabidopsis thaliana OX=3702)"	0.513181	0.0093	767064	2.58672e+10	1.49472e+06	1.32494e+09
326501536	24	8.35	Name:"Similar to PER15 Peroxidase 15 (Arabidopsis thaliana OX=3702)"	0.61847	0.036317	716290	3.67634e+09	1.15816e+06	5.73812e+10
194352756	51.1	5.36	papain-like cysteine proteinase [Hordeum vulgare subsp. vulgare]	1.51524	0.0131846	613131	3.17178e+09	404643	4.05776e+09
326527541	90.1	5.29	Name:"Similar to CDC48 Cell division cycle protein 48 homolog (Glycine max OX=3847)"	1.61243	0.020845	1.23448e+06	2.52908e+10	765604	2.29055e+10
326491679	83.5	5.96	Name:"Similar to BXL6 Probable beta-D-xylosidase 6 (Arabidopsis thaliana OX=3702)"	1.75823	0.029602	902859	2.17704e+10	513504	1.96934e+10
326508800	32	5.48	Name:"Similar to Chitinase 2 (Tulipa saxatilis subsp. bakeri OX=110455)"	1.88021	0.024381	548665	8.2093e+08	291810	6.26987e+09
326527975	23.1	8.65	Name:"Similar to 23 kDa jasmonate-induced protein (Hordeum vulgare OX=4513)"	2.33283	0.0178163	410297	3.09252e+09	175879	2.62209e+09
14164981	23.6	7.34	thaumatin-like protein TLP7 [Hordeum vulgare]	2.4306	0.0188616	592244	7.9292e+09	243662	4.45731e+09
2344818	25.2	6.83	basic pathogenesis-related protein PR5 [Hordeum vulgare subsp. vulgare]	2.82858	0.0110624	581910	1.04731e+09	205725	1.39582e+10
15797690	25.9	8.82	Name:"Similar to AOC Allene oxide cyclase, chloroplastic (Oryza sativa subsp. japonica OX=39947)"	Unique in control	NA	0	0	155812	4.98474e+08
326528939	38.1	6.39	Name:"Similar to BTR1 Protein BTR1 (Arabidopsis thaliana OX=3702)"	1.76196	0.046097	712882	2.20579e+10	404597	1.28857e+10
			Aminoacid biosynthesis
295415546	34.1	5.77	Name:"Similar to CYS1 Cysteine synthase (Triticum aestivum OX=4565)"	0.667125	0.0069984	1.34213e+06	2.01663e+09	2.01181e+06	4.97696e+10
326505500	55.3	7.33	Name:"Similar to IIL1 3-isopropylmalate dehydratase large subunit, chloroplastic (Arabidopsis thaliana OX=3702)"	2.7686	0.0118621	405801	7.77079e+09	146573	2.73209e+09
326495884	49.9	8.18	Name:"Similar to AGD2 Probable LL-diaminopimelate aminotransferase, chloroplastic (Oryza sativa subsp. japonica OX=39947)"	0.452003	0.028083	211320	6.86846e+09	467518	1.04873e+10
			electron transport in mitochondria
326502384	30.1	7.64	Name:"Similar to At4g02580 NADH dehydrogenase [ubiquinone] flavoprotein 2, mitochondrial (Arabidopsis thaliana OX=3702)"	0.527723	0.021776	112879	6.23254e+08	213898	1.67474e+09
326505250	33.8	9.72	Name:"Similar to ABT ADP,ATP carrier protein (Chlamydomonas reinhardtii OX=3055)"	0.642908	0.02794	886871	2.03166e+09	1.37947e+06	5.04323e+10
			Chromatine organisation
326503908	39	5.78	Name:"Similar to HIT4 Protein HEAT INTOLERANT 4 (Arabidopsis thaliana OX=3702)"	2.82682	0.031244	180050	8.17631e+08	63693.5	6.9861e+07
			Cytoskeleton
326489759	66	6.55	Name:"Similar to AIP1-2 Actin-interacting protein 1-2 (Arabidopsis thaliana OX=3702)"	Unique in control	NA	0	0	198627	5.35465e+09
			Unknown
326508720	35.6	5.38	Name:"Similar to TCEA1 Tuliposide A-converting enzyme 1, chloroplastic (Tulipa gesneriana OX=13306)"	1.92911	0.043483	351500	4.5154e+09	182209	6.66916e+07
326491625	47.9	6.32	Name:"Similar to OST48 Dolichyl-diphosphooligosaccharide--protein glycosyltransferase 48 kDa subunit (Oryza sativa subsp. japonica OX=39947)"	4.13917	0.0053365	379580	1.33933e+08	91704.4	7.57089e+08
326519400	39.3	5.85	Name:"Similar to RGGB RGG repeats nuclear RNA binding protein B (Arabidopsis thaliana OX=3702)"	Unique in control	NA	0	0	222871	6.06651e+09
326513512	20	5.48	Name:"Similar to lsm12a Protein LSM12 homolog A (Danio rerio OX=7955)"	Unique in control	NA	0	0	225091	1.2444e+09
257669940	18.5	7.25	Name:"Similar to BTF3 Basic transcription factor 3 (Arabidopsis thaliana OX=3702)"	Unique in control	NA	0	0	105299	8.94574e+08

## Sheet: Datasheet 4B_GO_BP
Data sheet 4B. Gene ontology annotation of differentialy regulated proteins found between mock treated and flg22 treated WT barley roots according to biological process.
Level	GO ID	GO Name	GO Type	Parents (ACC)	Parents (Name)	Nodescore	#Seqs	Sequence Names
1	GO:0008150	biological_process	Biological Process			48.62	35	BAK01268.1, BAJ95922.1, BAJ95421.1, BAJ98400.1, CBL76028.1, BAJ93264.1, CAY06079.1, BAJ85477.1, BAJ94290.1, BAF33069.1, CAC88339.1, BAJ95568.1, BAJ99666.1, CBM38599.1, BAK02478.1, CAQ00106.1, sp|P52711.1|CBP23_HORVU, BAJ94181.1, AFP72240.1, BAJ92402.1, BAJ87483.1, BAJ95255.1, BAJ94317.1, BAJ99755.1, BAJ90564.1, BAJ88210.1, BAK08031.1, BAK02557.1, CBV16322.1, BAK03413.1, BAJ95309.1, AAM51720.1, BA…
2	GO:0008152	metabolic process	Biological Process	GO:0008150	biological_process	47.24	28	BAK01268.1, BAJ95922.1, BAJ95421.1, BAJ98400.1, CBL76028.1, CAY06079.1, BAJ94290.1, CAC88339.1, BAJ95568.1, BAJ99666.1, CBM38599.1, BAK02478.1, CAQ00106.1, sp|P52711.1|CBP23_HORVU, BAJ94181.1, AFP72240.1, BAJ92402.1, BAJ87483.1, BAJ94317.1, BAJ95255.1, BAJ90564.1, BAK08031.1, BAK02557.1, CBV16322.1, BAK03413.1, BAJ95309.1, AAM51720.1, BAK04892.1
2	GO:0009987	cellular process	Biological Process	GO:0008150	biological_process	25.97	23	BAK01268.1, BAJ95421.1, BAJ99755.1, BAK08031.1, BAJ88210.1, CBL76028.1, CAY06079.1, BAJ93264.1, BAK02557.1, CBV16322.1, BAJ85477.1, BAJ94290.1, BAK03413.1, AAM51720.1, BAF33069.1, BAK02740.1, CAC88339.1, CBM38599.1, BAK03012.1, BAK02478.1, BAJ94181.1, BAK04892.1, BAJ92402.1
3	GO:0044238	primary metabolic process	Biological Process	GO:0008152	metabolic process	12.26	17	BAK01268.1, BAJ95922.1, BAK08031.1, CAY06079.1, CBV16322.1, BAJ94290.1, BAK03413.1, BAJ95309.1, AAM51720.1, BAJ95568.1, BAJ99666.1, BAK02478.1, CAQ00106.1, sp|P52711.1|CBP23_HORVU, AFP72240.1, BAJ92402.1, BAJ94317.1
3	GO:0071704	organic substance metabolic process	Biological Process	GO:0008152	metabolic process	9.3	17	BAK01268.1, BAJ95922.1, BAK08031.1, CAY06079.1, CBV16322.1, BAJ94290.1, BAK03413.1, BAJ95309.1, AAM51720.1, BAJ95568.1, BAJ99666.1, BAK02478.1, CAQ00106.1, sp|P52711.1|CBP23_HORVU, AFP72240.1, BAJ92402.1, BAJ94317.1
3	GO:0009058	biosynthetic process	Biological Process	GO:0008152	metabolic process	12.65	12	BAK01268.1, BAK02478.1, BAJ95421.1, BAJ90564.1, BAK08031.1, CBL76028.1, CAY06079.1, BAJ94290.1, BAK03413.1, BAJ92402.1, CAC88339.1, CBM38599.1
3	GO:0006807	nitrogen compound metabolic process	Biological Process	GO:0008152	metabolic process	4.84	11	BAK01268.1, BAK02478.1, BAK08031.1, CAQ00106.1, sp|P52711.1|CBP23_HORVU, CAY06079.1, CBV16322.1, BAJ94290.1, AAM51720.1, BAJ92402.1, BAJ99666.1
3	GO:0044237	cellular metabolic process	Biological Process	GO:0009987, GO:0008152	cellular process, metabolic process	3.74	9	BAK01268.1, BAK02478.1, BAK08031.1, CAY06079.1, BAJ94290.1, BAK03413.1, AAM51720.1, BAK04892.1, BAJ92402.1
4	GO:0019538	protein metabolic process	Biological Process	GO:0043170, GO:1901564, GO:0044238	macromolecule metabolic process, organonitrogen compound metabolic process, primary metabolic process	10.44	9	BAK02478.1, BAK08031.1, CAQ00106.1, CAY06079.1, sp|P52711.1|CBP23_HORVU, CBV16322.1, BAJ94290.1, BAJ92402.1, BAJ99666.1
4	GO:0043170	macromolecule metabolic process	Biological Process	GO:0071704	organic substance metabolic process	6.7	9	BAK02478.1, BAK08031.1, CAQ00106.1, sp|P52711.1|CBP23_HORVU, CAY06079.1, CBV16322.1, BAJ94290.1, BAJ92402.1, BAJ99666.1
4	GO:1901564	organonitrogen compound metabolic process	Biological Process	GO:0006807, GO:0071704	nitrogen compound metabolic process, organic substance metabolic process	6.26	9	BAK02478.1, BAK08031.1, CAQ00106.1, sp|P52711.1|CBP23_HORVU, CAY06079.1, CBV16322.1, BAJ94290.1, BAJ92402.1, BAJ99666.1
2	GO:0050896	response to stimulus	Biological Process	GO:0008150	biological_process	8.4	7	BAK02557.1, BAJ94181.1, BAK03413.1, BAJ87483.1, BAK02740.1, BAJ95255.1, CBM38599.1
4	GO:0005975	carbohydrate metabolic process	Biological Process	GO:0071704, GO:0044238	organic substance metabolic process, primary metabolic process	7	7	BAJ95922.1, AFP72240.1, BAK03413.1, BAJ95309.1, AAM51720.1, BAJ95568.1, BAJ94317.1
3	GO:0006950	response to stress	Biological Process	GO:0050896	response to stimulus	6	6	BAK02557.1, BAJ94181.1, BAJ87483.1, BAK02740.1, BAJ95255.1, CBM38599.1
4	GO:0034641	cellular nitrogen compound metabolic process	Biological Process	GO:0006807, GO:0044237	nitrogen compound metabolic process, cellular metabolic process	2.19	6	BAK01268.1, BAK02478.1, BAK08031.1, CAY06079.1, AAM51720.1, BAJ92402.1
3	GO:0009056	catabolic process	Biological Process	GO:0008152	metabolic process	5	5	BAK08031.1, BAK02557.1, CBV16322.1, BAJ94181.1, AAM51720.1
3	GO:0042221	response to chemical	Biological Process	GO:0050896	response to stimulus	4	4	BAK02557.1, BAJ94181.1, BAK03413.1, BAJ87483.1
4	GO:0044260	cellular macromolecule metabolic process	Biological Process	GO:0043170, GO:0044237	macromolecule metabolic process, cellular metabolic process	1.44	4	BAK02478.1, CAY06079.1, BAJ94290.1, BAJ92402.1
5	GO:0044267	cellular protein metabolic process	Biological Process	GO:0044260, GO:0019538	cellular macromolecule metabolic process, protein metabolic process	2.4	4	BAK02478.1, CAY06079.1, BAJ94290.1, BAJ92402.1
2	GO:0051179	localization	Biological Process	GO:0008150	biological_process	1.08	3	BAK03012.1, BAJ85477.1, BAF33069.1
3	GO:0009628	response to abiotic stimulus	Biological Process	GO:0050896	response to stimulus	3	3	BAJ87483.1, BAK02740.1, CBM38599.1
3	GO:0051234	establishment of localization	Biological Process	GO:0051179	localization	1.8	3	BAK03012.1, BAJ85477.1, BAF33069.1
4	GO:0044249	cellular biosynthetic process	Biological Process	GO:0009058, GO:0044237	biosynthetic process, cellular metabolic process	1.08	3	BAK02478.1, CAY06079.1, BAJ92402.1
4	GO:0006091	generation of precursor metabolites and energy	Biological Process	GO:0044237	cellular metabolic process	3	3	BAK03413.1, AAM51720.1, BAK04892.1
4	GO:0006810	transport	Biological Process	GO:0051234	establishment of localization	3	3	BAK03012.1, BAJ85477.1, BAF33069.1
4	GO:0006725	cellular aromatic compound metabolic process	Biological Process	GO:0044237	cellular metabolic process	1.8	3	BAK01268.1, BAK08031.1, AAM51720.1
4	GO:1901360	organic cyclic compound metabolic process	Biological Process	GO:0071704	organic substance metabolic process	1.8	3	BAK01268.1, BAK08031.1, AAM51720.1
4	GO:1901576	organic substance biosynthetic process	Biological Process	GO:0009058, GO:0071704	biosynthetic process, organic substance metabolic process	0.65	3	BAK02478.1, CAY06079.1, BAJ92402.1
4	GO:0006139	nucleobase-containing compound metabolic process	Biological Process	GO:1901360, GO:0034641, GO:0044238, GO:0046483, GO:0006725	organic cyclic compound metabolic process, cellular nitrogen compound metabolic process, primary metabolic process, heterocycle metabolic process, cellular aromatic compound metabolic process	3	3	BAK01268.1, BAK08031.1, AAM51720.1
4	GO:0046483	heterocycle metabolic process	Biological Process	GO:0044237	cellular metabolic process	1.8	3	BAK01268.1, BAK08031.1, AAM51720.1
5	GO:1901566	organonitrogen compound biosynthetic process	Biological Process	GO:1901576, GO:1901564	organic substance biosynthetic process, organonitrogen compound metabolic process	1.08	3	BAK02478.1, CAY06079.1, BAJ92402.1
5	GO:0006518	peptide metabolic process	Biological Process	GO:1901564, GO:0043603	organonitrogen compound metabolic process, cellular amide metabolic process	1.08	3	BAK02478.1, CAY06079.1, BAJ92402.1
5	GO:0009059	macromolecule biosynthetic process	Biological Process	GO:0043170, GO:1901576	macromolecule metabolic process, organic substance biosynthetic process	1.08	3	BAK02478.1, CAY06079.1, BAJ92402.1
5	GO:0043603	cellular amide metabolic process	Biological Process	GO:0034641	cellular nitrogen compound metabolic process	0.65	3	BAK02478.1, CAY06079.1, BAJ92402.1
5	GO:0010467	gene expression	Biological Process	GO:0043170	macromolecule metabolic process	1.8	3	BAK02478.1, CAY06079.1, BAJ92402.1
5	GO:0034645	cellular macromolecule biosynthetic process	Biological Process	GO:0044260, GO:0044249, GO:0009059	cellular macromolecule metabolic process, cellular biosynthetic process, macromolecule biosynthetic process	1.8	3	BAK02478.1, CAY06079.1, BAJ92402.1
5	GO:0044271	cellular nitrogen compound biosynthetic process	Biological Process	GO:0044249, GO:0034641	cellular biosynthetic process, cellular nitrogen compound metabolic process	0.65	3	BAK02478.1, CAY06079.1, BAJ92402.1
6	GO:0006412	translation	Biological Process	GO:0044267, GO:0043043, GO:0010467, GO:0034645	cellular protein metabolic process, peptide biosynthetic process, gene expression, cellular macromolecule biosynthetic process	3	3	BAK02478.1, CAY06079.1, BAJ92402.1
6	GO:0043043	peptide biosynthetic process	Biological Process	GO:1901566, GO:0006518, GO:0043604	organonitrogen compound biosynthetic process, peptide metabolic process, amide biosynthetic process	1.8	3	BAK02478.1, CAY06079.1, BAJ92402.1
6	GO:0043604	amide biosynthetic process	Biological Process	GO:0044271, GO:0043603	cellular nitrogen compound biosynthetic process, cellular amide metabolic process	1.08	3	BAK02478.1, CAY06079.1, BAJ92402.1

## Sheet: Datasheet 4C_GO_CC
Data sheet 4C. Gene ontology annotation of differentialy regulated proteins found between mock treated and flg22 treated WT barley roots. according to cellular compartment.
Level	GO ID	GO Name	GO Type	Parents (ACC)	Parents (Name)	Nodescore	#Seqs	Sequence Names
1	GO:0005575	cellular_component	Cellular Component			9.94	21	BAK01268.1, BAJ99755.1, BAK08031.1, BAJ93264.1, CAY06079.1, CBV16322.1, BAJ94290.1, BAK03413.1, BAF33069.1, BAJ95568.1, BAK05378.1, BAJ99688.1, CBM38599.1, BAK03012.1, BAK02478.1, BAJ96699.1, BAJ94181.1, AFP72240.1, BAJ92402.1, BAJ87483.1, BAJ95255.1
2	GO:0110165	cellular anatomical entity	Cellular Component	GO:0005575	cellular_component	16.56	21	BAK01268.1, BAJ99755.1, BAK08031.1, BAJ93264.1, CAY06079.1, CBV16322.1, BAJ94290.1, BAK03413.1, BAF33069.1, BAJ95568.1, BAK05378.1, BAJ99688.1, CBM38599.1, BAK03012.1, BAK02478.1, BAJ96699.1, BAJ94181.1, AFP72240.1, BAJ92402.1, BAJ87483.1, BAJ95255.1
3	GO:0005622	intracellular anatomical structure	Cellular Component	GO:0110165	cellular anatomical entity	11.59	15	BAK01268.1, BAJ99755.1, BAK08031.1, CAY06079.1, BAJ93264.1, CBV16322.1, BAJ94290.1, BAK03413.1, BAK05378.1, BAK03012.1, BAK02478.1, BAJ96699.1, BAJ92402.1, BAJ87483.1, BAJ95255.1
3	GO:0005737	cytoplasm	Cellular Component	GO:0110165, GO:0005622	cellular anatomical entity, intracellular anatomical structure	17.52	12	BAK03012.1, BAK01268.1, BAJ99755.1, BAK08031.1, BAJ96699.1, BAJ93264.1, CBV16322.1, BAJ94290.1, BAK03413.1, BAJ87483.1, BAK05378.1, BAJ95255.1
3	GO:0043226	organelle	Cellular Component	GO:0110165	cellular anatomical entity	2.64	11	BAK03012.1, BAK02478.1, BAJ96699.1, CAY06079.1, BAJ93264.1, CBV16322.1, BAJ94290.1, BAK03413.1, BAJ92402.1, BAK05378.1, BAJ95255.1
4	GO:0043229	intracellular organelle	Cellular Component	GO:0043226, GO:0005622	organelle, intracellular anatomical structure	4.39	11	BAK03012.1, BAK02478.1, BAJ96699.1, CAY06079.1, BAJ93264.1, CBV16322.1, BAJ94290.1, BAK03413.1, BAJ92402.1, BAK05378.1, BAJ95255.1
4	GO:0043227	membrane-bounded organelle	Cellular Component	GO:0043226	organelle	3.31	8	BAK03012.1, BAJ96699.1, BAJ93264.1, CBV16322.1, BAJ94290.1, BAK03413.1, BAK05378.1, BAJ95255.1
5	GO:0043231	intracellular membrane-bounded organelle	Cellular Component	GO:0043229, GO:0043227	intracellular organelle, membrane-bounded organelle	5.52	8	BAK03012.1, BAJ96699.1, BAJ93264.1, CBV16322.1, BAJ94290.1, BAK03413.1, BAK05378.1, BAJ95255.1
3	GO:0016020	membrane	Cellular Component	GO:0110165	cellular anatomical entity	6	6	BAK03012.1, BAJ94290.1, AFP72240.1, BAF33069.1, BAJ95255.1, BAJ99688.1
4	GO:0005739	mitochondrion	Cellular Component	GO:0043231, GO:0005737	intracellular membrane-bounded organelle, cytoplasm	5	5	BAK03012.1, BAJ93264.1, BAK03413.1, BAK05378.1, BAJ95255.1
4	GO:0043228	non-membrane-bounded organelle	Cellular Component	GO:0043226	organelle	1.08	3	BAK02478.1, CAY06079.1, BAJ92402.1
5	GO:0043232	intracellular non-membrane-bounded organelle	Cellular Component	GO:0043228, GO:0043229	non-membrane-bounded organelle, intracellular organelle	1.8	3	BAK02478.1, CAY06079.1, BAJ92402.1
6	GO:0005840	ribosome	Cellular Component	GO:0043232	intracellular non-membrane-bounded organelle	3	3	BAK02478.1, CAY06079.1, BAJ92402.1
3	GO:0030312	external encapsulating structure	Cellular Component	GO:0071944, GO:0110165	cell periphery, cellular anatomical entity	1.2	2	BAJ95568.1, CBM38599.1
3	GO:0005829	cytosol	Cellular Component	GO:0005737, GO:0110165	cytoplasm, cellular anatomical entity	2	2	BAK08031.1, BAJ87483.1
3	GO:0071944	cell periphery	Cellular Component	GO:0110165	cellular anatomical entity	0.72	2	BAJ95568.1, CBM38599.1
4	GO:0005618	cell wall	Cellular Component	GO:0030312	external encapsulating structure	2	2	BAJ95568.1, CBM38599.1
4	GO:0009536	plastid	Cellular Component	GO:0043231, GO:0005737	intracellular membrane-bounded organelle, cytoplasm	1.2	2	BAJ93264.1, BAK03413.1
5	GO:0009507	chloroplast	Cellular Component	GO:0009536	plastid	2	2	BAJ93264.1, BAK03413.1
6	GO:0005634	nucleus	Cellular Component	GO:0043231	intracellular membrane-bounded organelle	2	2	BAJ96699.1, CBV16322.1

## Sheet: Datasheet 4D_KEGG
Data sheet 4D. KEGG pathway analysis of differentialy regulated proteins found between mock treated and flg22 treated WT barley roots.
Pathway	Pathway ID	#Enzs in Pathway	Enzyme	#Seqs of Enzyme	Seqs
Other glycan degradation	map00511	2	ec:3.2.1.23 - lactase (ambiguous), ec:3.2.1.24 - alpha-D-mannosidase	1, 1	BAJ95568.1, BAJ95309.1
O-Antigen nucleotide sugar biosynthesis	map00541	1	ec:5.4.2.8 - mannose phosphomutase	1	BAK01268.1
Sphingolipid metabolism	map00600	1	ec:3.2.1.23 - lactase (ambiguous)	1	BAJ95568.1
Phenylpropanoid biosynthesis	map00940	1	ec:1.11.1.7 - lactoperoxidase	2	BAK02557.1, BAJ94181.1
Purine metabolism	map00230	1	ec:3.6.1.15 - phosphatase	2	BAK05687.1, BAK08031.1
Glycosaminoglycan degradation	map00531	1	ec:3.2.1.23 - lactase (ambiguous)	1	BAJ95568.1
Valine, leucine and isoleucine biosynthesis	map00290	1	ec:4.2.1.33 - dehydratase	1	BAJ95421.1
Starch and sucrose metabolism	map00500	1	ec:2.4.1.10 - sucrose 6-fructosyltransferase	1	AFP72240.1
Glycosphingolipid biosynthesis - ganglio series	map00604	1	ec:3.2.1.23 - lactase (ambiguous)	1	BAJ95568.1
Galactose metabolism	map00052	1	ec:3.2.1.23 - lactase (ambiguous)	1	BAJ95568.1
Pentose phosphate pathway	map00030	1	ec:2.2.1.2 - dihydroxyacetonetransferase	1	BAK03413.1
Amino sugar and nucleotide sugar metabolism	map00520	1	ec:5.4.2.8 - mannose phosphomutase	1	BAK01268.1
Fructose and mannose metabolism	map00051	1	ec:5.4.2.8 - mannose phosphomutase	1	BAK01268.1
Arginine and proline metabolism	map00330	1	ec:1.5.1.2 - reductase	1	CBM38599.1
Thiamine metabolism	map00730	1	ec:3.6.1.15 - phosphatase	2	BAK05687.1, BAK08031.1

## Sheet: Datasheet 4E_domains
Data sheet 4E. Interpro protein domains identified in differentialy regulated proteins found between mock treated and flg22 treated WT barley roots.
IPS Domain	#Seqs
(IPR033905) Secretory peroxidase	2	BAK02557.1, BAJ94181.1
(IPR003959) ATPase, AAA-type, core	2	BAK08031.1, BAK08045.1
(IPR041569) AAA ATPase, AAA+ lid domain	2	BAK08031.1, BAK08045.1
(IPR002016) Haem peroxidase	2	BAK02557.1, BAJ94181.1
(IPR000504) RNA recognition motif domain	2	BAJ99755.1, BAJ85374.1
(IPR001926) Pyridoxal-phosphate dependent enzyme	1	CBL76028.1
(IPR026891) Fibronectin type III-like domain	1	BAJ94317.1
(IPR000602) Glycoside hydrolase family 38, N-terminal domain	1	BAJ95309.1
(IPR023210) NADP-dependent oxidoreductase domain	1	BAJ98400.1
(IPR013094) Alpha/beta hydrolase fold-3	1	BAJ95882.1
(IPR004839) Aminotransferase, class I/classII	1	BAJ90564.1
(IPR006861) Hyaluronan/mRNA-binding protein	1	BAJ96699.1
(IPR000668) Peptidase C1A, papain C-terminal	1	CAQ00106.1
(IPR028939) Pyrroline-5-carboxylate reductase, catalytic, N-terminal	1	CBM38599.1
(IPR002715) Nascent polypeptide-associated complex NAC domain	1	CBD25145.1
(IPR015590) Aldehyde dehydrogenase domain	1	BAJ87483.1
(IPR001279) Metallo-beta-lactamase	1	BAK05254.1
(IPR003338) CDC48, N-terminal subdomain	1	BAK08045.1
(IPR002942) RNA-binding S4 domain	1	CAY06079.1
(IPR006016) UspA	1	BAK02323.1
(IPR039417) Papain-like cysteine endopeptidase	1	CAQ00106.1
(IPR042128) NuoE domain	1	BAJ95255.1
(IPR001223) Glycoside hydrolase family 18, catalytic domain	1	BAJ95922.1
(IPR013845) Ribosomal protein S4e, central region	1	CAY06079.1
(IPR004201) CDC48, domain 2	1	BAK08045.1
(IPR001199) Cytochrome b5-like heme/steroid binding domain	1	BAJ99688.1
(IPR017986) WD40-repeat-containing domain	1	BAK01860.1
(IPR041982) Ribosomal protein S4, KOW domain	1	CAY06079.1
(IPR000426) Proteasome alpha-subunit, N-terminal domain	1	CBV16322.1
(IPR002772) Glycoside hydrolase family 3 C-terminal domain	1	BAJ94317.1
(IPR019181) Anticodon-binding domain	1	BAJ87775.1
(IPR029036) Pyrroline-5-carboxylate reductase, dimerisation domain	1	CBM38599.1
(IPR041392) Beta-galactosidase, beta-sandwich domain	1	BAJ95568.1
(IPR004088) K Homology domain, type 1	1	BAJ97491.1
(IPR005824) KOW	1	CAY06079.1
(IPR001567) Peptidase M3A/M3B catalytic domain	1	BAJ99666.1
(IPR013148) Glycosyl hydrolase family 32, N-terminal	1	AFP72240.1
(IPR032277) 40S ribosomal protein S4, C-terminal domain	1	CAY06079.1
(IPR041147) Glycosyl hydrolases family 38, C-terminal beta sandwich domain	1	BAJ95309.1
(IPR014039) Translation elongation factor EFTs/EF1B, dimerisation	1	BAK05378.1
(IPR024675) Eukaryotic translation initiation factor 3 subunit G, N-terminal	1	BAJ99755.1
(IPR011682) Glycosyl hydrolase family 38, C-terminal	1	BAJ95309.1
(IPR013843) Ribosomal protein S4e, N-terminal	1	CAY06079.1
(IPR000922) D-galactoside/L-rhamnose binding SUEL lectin domain	1	BAJ95568.1
(IPR003439) ABC transporter-like	1	BAK05687.1
(IPR019084) Stm1-like, N-terminal	1	BAJ96699.1
(IPR034240) eIF3G, RNA recognition motif	1	BAJ99755.1
(IPR001030) Aconitase/3-isopropylmalate dehydratase large subunit, alpha/beta/alpha domain	1	BAJ95421.1
(IPR015341) Glycoside hydrolase family 38, central domain	1	BAJ95309.1
(IPR015415) Vps4 oligomerisation, C-terminal	1	BAK08045.1
(IPR032501) Proteasomal ATPase OB C-terminal domain	1	BAK08031.1
(IPR013201) Cathepsin propeptide inhibitor domain (I29)	1	CAQ00106.1
(IPR005225) Small GTP-binding protein domain	1	CAD48129.2
(IPR000118) Granulin	1	CAQ00106.1
(IPR033941) 3-Isopropylmalate dehydratase, catalytic domain	1	BAJ95421.1
(IPR001764) Glycoside hydrolase, family 3, N-terminal	1	BAJ94317.1
(IPR031330) Glycoside hydrolase 35, catalytic domain	1	BAJ95568.1
(IPR013189) Glycosyl hydrolase family 32, C-terminal	1	AFP72240.1
