# Supplementary material for: TALEN-Based HvMPK3 Knock-Out Attenuates Proteome and Root Hair Phenotypic Responses to flg22 in Barley
Source: Front Plant Sci. 2021 Apr 29;12:666229. doi: 10.3389/fpls.2021.666229 (PMC8117018; doi:10.3389/fpls.2021.666229)
Supplement: Supplementary Data Sheet 5 — Differentially regulated proteins found between controls and flg22-treated roots of barley HvMPK3 KO lines and their bioinformatic evaluation. [file Data_Sheet_5.xlsx]

## Sheet: Datasheet 5A_List
Data sheet 5A. Summary of differentialy regulated proteins found between mock treated and flg22-treated roots of barley HvMPK3 KO lines.
Accession	MW [kDa]	calc. pI	Description	Ratio (FLG22 vs control)	P-value	Mean (flg22 treated)	Variance (flg22 treated)	Mean (control)	Variance (control)
			Transport, targeting, trafficking
326494930	122.7	5.06	Name:"Similar to SEC31B Protein transport protein SEC31 homolog B (Arabidopsis thaliana OX=3702)"	0.213577	0.040597	74294.6	4.33652e+07	347858	1.12202e+10
326503000	98.7	5.14	Name:"Similar to Os07g0201100 Coatomer subunit gamma-2 (Oryza sativa subsp. japonica OX=39947)"	Unique in flg22	NA	285796	6.60719e+10	0	0
326504442	11.6	5.14	Name:"Similar to AKR2A Ankyrin repeat domain-containing protein 2A (Arabidopsis thaliana OX=3702)"	Unique in control	NA	0	0	174310	2.77153e+09
326507126	26	5.68	Name:"Similar to VPS24-1 Vacuolar protein sorting-associated protein 24 homolog 1 (Arabidopsis thaliana OX=3702)"	3.0139	0.03894	395088	5.70459e+09	131088	5.75948e+07
			Defense response
326488925	33	7.93	Name:"Similar to Glucan endo-1,3-beta-glucosidase GI (Hordeum vulgare OX=4513)"	1.79215	0.044696	1.67574e+06	1.24779e+11	935048	7.26779e+10
2429087	96.7	6.73	lipoxygenase 2 [Hordeum vulgare subsp. vulgare]	Unique in control	NA	3.19031e+06	9.99426e+11	0	0
326529301	18.7	9.11	Name:"Similar to PRMS Pathogenesis-related protein PRMS (Zea mays OX=4577)"	0.213711	0.020464	156524	3.60226e+09	732410	5.17049e+10
326518626	37.1	8.02	Name:"Similar to PER1 Peroxidase 1 (Zea mays OX=4577)"	0.328374	0.029603	1.34264e+06	6.29906e+10	4.08874e+06	1.64439e+12
			Translation
326510581	45.6	8.62	Name:"Similar to MORF1 Multiple organellar RNA editing factor 1, mitochondrial (Arabidopsis thaliana OX=3702)"	4.40959	0.043503	344159	2.34349e+10	78047.9	1.58493e+09
326503120	75.8	5.11	Name:"Similar to Os04g0620700 Nucleolin 2 (Oryza sativa subsp. japonica OX=39947)"	2.10211	0.00102198	132628	2.26531e+06	63092.7	7.65186e+06
326496098	12.7	10.62	Name:"Similar to RPL35AC 60S ribosomal protein L35a-3 (Arabidopsis thaliana OX=3702)"	2.89406	0.0106404	392505	3.58604e+09	135624	1.0683e+08
326532020	48.3	6.4	Name:"Similar to TUFA Elongation factor Tu, mitochondrial (Arabidopsis thaliana OX=3702)"	0.61446	0.030759	1.06072e+06	6.21208e+10	1.72627e+06	6.20694e+10
326527057	17.5	11.12	Name:"Similar to RPL26A 60S ribosomal protein L26-1 (Arabidopsis thaliana OX=3702)"	1.59694	0.042624	1.08574e+06	4.27357e+10	679885	1.46525e+10
326510727	27.6	11.14	Name:"Similar to SG12 60S ribosomal protein L10-2 (Oryza sativa subsp. japonica OX=39947)"	2.20301	0.02404	585098	1.9779e+10	265590	4.67724e+09
326488521	29.8	9.79	Name:"Similar to RPS3A 40S ribosomal protein S3a (Oryza sativa subsp. japonica OX=39947)"	0.52092	0.053559	496736	4.47524e+10	953574	4.05241e+10
933919530	46.8	6.58	eukaryotic elongation factor 1 gamma [Hordeum vulgare]	1.51956	0.023661	1.8144e+06	3.83777e+10	1.19403e+06	5.29104e+10
			Protein folding
326490563	33.8	4.7	Name:"Similar to HSP70-7 Heat shock 70 kDa protein 7, chloroplastic (Arabidopsis thaliana OX=3702)"	0.471979	0.0040558	338043	5.22515e+09	716223	6.97379e+09
326522080	21.4	4.78	Name:"Similar to Ppie Peptidyl-prolyl cis-trans isomerase E (Mus musculus OX=10090)"	2.15947	0.054162	478204	1.37574e+10	221445	1.33974e+10
326523037	42.2	9.61	Name:"Similar to Heat shock 70 kDa protein, mitochondrial (Phaseolus vulgaris OX=3885)"	0.618196	0.0124641	1.22108e+06	9.85204e+09	1.97524e+06	5.05924e+10
			Aminoacid metabolism
395759274	55.1	6.52	Chain B, Alanine aminotransferase 2	0.569695	0.027755	848186	2.06409e+10	1.48884e+06	8.70512e+10
295415542	40.9	6.4	Name:"Similar to Cysteine synthase, chloroplastic/chromoplastic (Solanum tuberosum OX=4113)"	1.4681	0.050903	2.00569e+06	8.43995e+10	1.36618e+06	7.67896e+10
326488637	35.8	9.39	Name:"Similar to Os01g0760600 Aspartate aminotransferase, cytoplasmic (Oryza sativa subsp. japonica OX=39947)"	1.54137	0.042901	2.084e+06	3.27388e+10	1.35204e+06	1.54744e+11
326511579	41.8	5.86	Name:"Similar to IMDH2 3-isopropylmalate dehydrogenase 2, chloroplastic (Arabidopsis thaliana OX=3702)"	1.59797	0.038183	947686	1.76516e+10	593058	6.93037e+08
326490820	56.3	8.21	Name:"Similar to Threonine synthase, chloroplastic (Solanum tuberosum OX=4113)"	Unique in control	NA	0	0	249566	9.34038e+09
68655446	42.7	5.83	Name:"Similar to SAM3 S-adenosylmethionine synthase 3 (Hordeum vulgare OX=4513)"	0.624932	0.052239	6.36718e+06	1.66227e+12	1.01886e+07	4.19955e+12
326525020	60.6	5.95	Name:"Similar to ALAAT2 Alanine aminotransferase 2, mitochondrial (Arabidopsis thaliana OX=3702)"	2.75848	0.00187546	372545	1.6847e+09	135054	1.48917e+09
			Stress response and signalling
326526311	19.7	5.76	Name:"Similar to PLAT1 PLAT domain-containing protein 1 (Arabidopsis thaliana OX=3702)"	0.390979	0.052623	549254	1.20528e+09	1.40482e+06	8.23773e+10
167036	58.5	7.17	dehydrin DHN5 [Hordeum vulgare subsp. vulgare]	0.645289	0.027661	450904	7.76102e+09	698763	8.32531e+09
326488501	40.3	8.75	Name:"Similar to CPA N-carbamoylputrescine amidase (Oryza sativa subsp. japonica OX=39947)"	0.501711	0.0108006	208063	1.88517e+09	414707	4.43376e+09
326529087	34.2	5.91	Name:"Similar to PK Pyridoxal kinase (Arabidopsis thaliana OX=3702)"	Unique in flg22	NA	261929	1.25382e+10	0	0
			Protein degradation and processing
326519234	26.3	5.4	Name:"Similar to PBA1 Proteasome subunit beta type-6 (Arabidopsis thaliana OX=3702)"	0.59834	0.030622	787069	1.70835e+10	1.31542e+06	6.09633e+10
300568846	25.9	4.68	Name:"Similar to PAE1 Proteasome subunit alpha type-5 (Oryza sativa subsp. japonica OX=39947)"	0.658785	0.0195645	1.07429e+06	3.02217e+10	1.63071e+06	3.50559e+10
326503998	11.2	5.55	Name:"Similar to SUMO1 Small ubiquitin-related modifier 1 (Oryza sativa subsp. japonica OX=39947)"	2.59549	0.044096	418840	3.54815e+09	161372	2.00892e+10
257328678	39.1	6.84	Name:"Similar to Thiol protease aleurain (Hordeum vulgare OX=4513)"	0.639175	0.0052957	1.2975e+06	1.5207e+10	2.02996e+06	3.77953e+10
1706082	55.9	5.64	RecName: Full=Serine carboxypeptidase II-3; AltName: Full=CP-MII.3; Contains: RecName: Full=Serine carboxypeptidase II-3 chain A; Contains: RecName: Full=Serine carboxypeptidase II-3 chain B; Flags: Precursor	2.70406	0.0116844	461721	7.00795e+09	170751	6.10992e+09
			Mitochondrial electron transport
326490357	20	4.21	Name:"Similar to MIA40 Mitochondrial intermembrane space import and assembly protein 40 (Kluyveromyces lactis (strain ATCC 8585 / CBS 2359 / DSM 70799 / NBRC 1267 / NRRL Y-1140 / WM37) OX=284590)"	1.59475	0.041343	233666	1.97945e+08	146522	4.71231e+08
			Cytoskeleton
326495636	41.6	5.49	Name:"Similar to ACT2 Actin-2 (Oryza sativa subsp. japonica OX=39947)"	1.49442	0.023316	5.18205e+06	3.53523e+10	3.46759e+06	1.06634e+11
469614658	15.9	4.55	actin depolymerization factor-like protein [Hordeum vulgare subsp. spontaneum]	2.37287	0.0156958	953965	4.42893e+10	402030	1.18921e+10
326498957	112.3	7.96	Name:"Similar to VLN3 Villin-3 (Oryza sativa subsp. japonica OX=39947)"	Unique in control	NA	0	0	217871	4.74344e+10
			Chromatine organisation and nucleotide/nucleoside biosyntheis
326493412	37.9	4.97	Name:"Similar to Os12g0183300 3'(2'),5'-bisphosphate nucleotidase (Oryza sativa subsp. japonica OX=39947)"	0.529683	0.018375	305975	2.33106e+09	577657	4.57357e+08	catalyzes the removal of 3′-phosphate from 3′-phosphoadenosine-5′-phosphate (PAP) to form adenosine-5′-phosphate (AMP) and Pi.
326497985	37	5	Name:"Similar to RBSK Ribokinase (Arabidopsis thaliana OX=3702)"	0.487767	0.015763	248114	4.17951e+09	508673	8.37675e+09
326520894	23.6	10.74	Name:"Similar to Histone H1 (Triticum aestivum OX=4565)"	1.75312	0.0096188	256125	3.40566e+08	146096	5.61352e+08
			Metabolism
326500628	57.3	6.47	Name:"Similar to ALDH6B2 Methylmalonate-semialdehyde dehydrogenase [acylating], mitochondrial (Arabidopsis thaliana OX=3702)"	2.03093	0.017021	1.08911e+06	2.83941e+10	536263	3.08033e+10
326533328	61.7	5.47	Name:"Similar to RuBisCO large subunit-binding protein subunit alpha, chloroplastic (Pisum sativum OX=3888)"	0.658134	0.0048367	4.15309e+06	1.13913e+11	6.3104e+06	3.23436e+11
326498661	70.2	6.38	Name:"Similar to PAP1 Probable inactive purple acid phosphatase 1 (Arabidopsis thaliana OX=3702)"	Unique in control	NA	0	0	337503	5.66175e+10
326496543	44.3	8.94	Name:"Similar to LOC109345795 Gamma conglutin 1 (Lupinus angustifolius OX=3871)"	0.44072	0.037058	475802	3.40772e+10	1.0796e+06	3.37531e+10
326523379	11.8	9.5	Name:"Similar to DIR1 Putative lipid-transfer protein DIR1 (Arabidopsis thaliana OX=3702)"	0.448999	0.034741	88520.1	4.09491e+08	197150	4.55248e+08
2204226	22	6.92	alpha-galactosidase, partial [Hordeum vulgare subsp. vulgare]	0.386157	0.0048636	206413	2.1255e+09	534530	2.59657e+09
326528269	40.3	5.48	Name:"Similar to Os09g0509200 Pyruvate dehydrogenase E1 component subunit beta-2, mitochondrial (Oryza sativa subsp. japonica OX=39947)"	0.503875	0.027838	3.03898e+06	2.34052e+11	6.03121e+06	2.11978e+12
1540331562	65.6	8.07	chloroplastic glucose-6-phosphate dehydrogenase 3 [Hordeum vulgare]	0.245178	0.017737	97358.1	1.61706e+09	397091	1.11177e+10
			Nitrogen asssimilation
326491991	21.9	9.33	Name:"Similar to GLB Nitrogen regulatory protein P-II homolog (Oryza sativa subsp. japonica OX=39947)"	0.367293	0.026542	348792	3.83679e+10	949629	1.23088e+09
			Unknown function
326527177	36	7.9	Name:"Similar to ptges2 Prostaglandin E synthase 2 (Danio rerio OX=7955)"	0.416778	0.00191518	144516	5.08552e+07	346746	6.58405e+08
326513512	20	5.48	Name:"Similar to lsm12a Protein LSM12 homolog A (Danio rerio OX=7955)"	0.55922	0.029577	213509	9.34946e+08	381798	8.17564e+08
326531266	73.5	4.75	Name:"Similar to PATL5 Patellin-5 (Arabidopsis thaliana OX=3702)"	1.49347	0.022401	2.25435e+06	1.23489e+11	1.50948e+06	3.68986e+09
326494708	60.6	6.55	Name:"Similar to Ncln Nicalin (Mus musculus OX=10090)"	Unique in control	NA	0	0	100967	3.82208e+09
326504618	49.4	5.8	Name:"Similar to Acy1 Aminoacylase-1 (Mus musculus OX=10090)"	Unique in control	NA	0	0	611959	6.23202e+11
326499686	33.8	5.57	Name:"Similar to Dml 2,3-dimethylmalate lyase (Eubacterium barkeri OX=1528)"	3.28966	0.0032037	176064	8.95009e+08	53520.4	2.33011e+08
326519400	39.3	5.85	Name:"Similar to RGGB RGG repeats nuclear RNA binding protein B (Arabidopsis thaliana OX=3702)"	3.97731	0.00132453	520810	1.96746e+09	130945	3.70049e+07

## Sheet: Datasheet 5B_GO_BP
Data sheet 5B. Gene ontology annotation of differentialy regulated proteins found between mock treated and flg22 treated HvMPK3 KO roots according to biological process.
Level	GO ID	GO Name	GO Type	Parents (ACC)	Parents (Name)	Nodescore	#Seqs	Sequence Names
1	GO:0008150	biological_process	Biological Process			53.33	40	BAJ90077.1, CBL76026.1, BAK04470.1, BAJ94855.1, BAK02316.1, AAA32952.1, BAJ96616.1, BAJ87507.1, BAJ94980.1, BAJ85167.1, BAJ97930.1, BAJ88342.1, BAJ94733.1, BAJ94473.1, BAJ91711.1, BAJ93919.1, BAK04530.1, AZP89705.1, BAJ93316.1, BAK06600.1, BAK00937.1, CBV16324.1, pdb|3TCM|B, CAJ01704.1, BAJ95640.1, CBC42618.1, CAA74160.1, BAK07780.1, BAJ98074.1, BAJ92810.1, BAJ85560.1, AGH62455.1, BAJ90670.1, BAJ…
2	GO:0009987	cellular process	Biological Process	GO:0008150	biological_process	35.17	31	BAJ90077.1, BAK04470.1, CBL76026.1, BAJ94855.1, BAK02316.1, BAJ96616.1, BAJ87507.1, BAJ85167.1, BAJ97930.1, BAJ88342.1, BAJ94473.1, BAJ91711.1, BAK04530.1, BAJ93919.1, AZP89705.1, BAJ93316.1, BAK06600.1, CBV16324.1, pdb|3TCM|B, CAJ01704.1, BAJ95640.1, BAJ92810.1, BAJ85560.1, BAJ90670.1, AGH62455.1, BAJ93929.1, BAJ93636.1, BAJ91934.1, BAJ99125.1, BAK02464.1, AAB70865.1
2	GO:0050896	response to stimulus	Biological Process	GO:0008150	biological_process	5.16	5	BAJ88342.1, BAK06600.1, BAJ94473.1, AAA32952.1, BAJ88730.1
2	GO:0008152	metabolic process	Biological Process	GO:0008150	biological_process	49.72	30	BAJ90077.1, CBL76026.1, BAK04470.1, BAJ94855.1, BAK02316.1, BAJ96616.1, BAJ87507.1, BAJ94980.1, BAJ85167.1, BAJ97930.1, BAJ88342.1, BAJ94733.1, BAJ91711.1, BAJ93919.1, BAK04530.1, AZP89705.1, BAJ93316.1, BAK06600.1, BAK00937.1, CBV16324.1, pdb|3TCM|B, CAJ01704.1, CBC42618.1, CAA74160.1, BAK07780.1, BAJ98074.1, BAJ90670.1, BAJ93929.1, BAJ91934.1, AAB70865.1
3	GO:0044238	primary metabolic process	Biological Process	GO:0008152	metabolic process	11.66	16	BAJ93316.1, CBV16324.1, BAK04470.1, BAJ94855.1, BAJ96616.1, BAJ87507.1, CBC42618.1, BAJ85167.1, CAA74160.1, BAJ94733.1, BAJ98074.1, BAJ91711.1, BAJ90670.1, BAJ93929.1, AZP89705.1, AAB70865.1
3	GO:0009058	biosynthetic process	Biological Process	GO:0008152	metabolic process	14.86	14	BAJ93316.1, BAK00937.1, pdb|3TCM|B, CAJ01704.1, BAK04470.1, CBL76026.1, BAJ97930.1, BAK07780.1, BAJ91711.1, BAJ90670.1, BAJ93919.1, BAJ93929.1, BAJ91934.1, AAB70865.1
3	GO:0009056	catabolic process	Biological Process	GO:0008152	metabolic process	6	6	BAJ88342.1, CBV16324.1, pdb|3TCM|B, BAJ94855.1, BAJ96616.1, BAJ85167.1
3	GO:0071704	organic substance metabolic process	Biological Process	GO:0008152	metabolic process	9.02	16	BAJ93316.1, CBV16324.1, BAK04470.1, BAJ94855.1, BAJ96616.1, BAJ87507.1, CBC42618.1, BAJ85167.1, CAA74160.1, BAJ94733.1, BAJ98074.1, BAJ91711.1, BAJ90670.1, BAJ93929.1, AZP89705.1, AAB70865.1
3	GO:0006807	nitrogen compound metabolic process	Biological Process	GO:0008152	metabolic process	4.48	11	BAJ93316.1, BAJ94733.1, BAJ91711.1, CBV16324.1, BAJ90670.1, BAK04470.1, BAJ93929.1, BAJ94855.1, BAJ96616.1, BAJ87507.1, CBC42618.1
3	GO:0044237	cellular metabolic process	Biological Process	GO:0008152, GO:0009987	metabolic process, cellular process	3.14	9	BAJ93316.1, BAJ91711.1, BAJ90670.1, BAK04530.1, BAK04470.1, BAJ93929.1, BAJ94855.1, AZP89705.1, BAJ87507.1
4	GO:0034641	cellular nitrogen compound metabolic process	Biological Process	GO:0044237, GO:0006807	cellular metabolic process, nitrogen compound metabolic process	2.32	7	BAJ93316.1, BAJ91711.1, BAJ90670.1, BAK04470.1, BAJ93929.1, BAJ94855.1, BAJ87507.1
4	GO:1901576	organic substance biosynthetic process	Biological Process	GO:0071704, GO:0009058	organic substance metabolic process, biosynthetic process	0.86	4	BAJ91711.1, BAJ90670.1, BAK04470.1, BAJ93929.1
4	GO:0043170	macromolecule metabolic process	Biological Process	GO:0071704	organic substance metabolic process	6.24	8	BAJ94733.1, BAJ91711.1, CBV16324.1, BAJ90670.1, BAK04470.1, BAJ93929.1, BAJ96616.1, CBC42618.1
4	GO:0044260	cellular macromolecule metabolic process	Biological Process	GO:0043170, GO:0044237	macromolecule metabolic process, cellular metabolic process	1.44	4	BAJ91711.1, BAJ90670.1, BAK04470.1, BAJ93929.1
4	GO:1901564	organonitrogen compound metabolic process	Biological Process	GO:0071704, GO:0006807	organic substance metabolic process, nitrogen compound metabolic process	5.66	8	BAJ94733.1, BAJ91711.1, CBV16324.1, BAJ90670.1, BAK04470.1, BAJ93929.1, BAJ96616.1, CBC42618.1
4	GO:0019538	protein metabolic process	Biological Process	GO:0043170, GO:1901564, GO:0044238	macromolecule metabolic process, organonitrogen compound metabolic process, primary metabolic process	9.44	8	BAJ94733.1, BAJ91711.1, CBV16324.1, BAJ90670.1, BAK04470.1, BAJ93929.1, BAJ96616.1, CBC42618.1
4	GO:0044249	cellular biosynthetic process	Biological Process	GO:0044237, GO:0009058	cellular metabolic process, biosynthetic process	1.44	4	BAJ91711.1, BAJ90670.1, BAK04470.1, BAJ93929.1
4	GO:0005975	carbohydrate metabolic process	Biological Process	GO:0044238, GO:0071704	primary metabolic process, organic substance metabolic process	5	5	BAJ98074.1, BAJ94855.1, AZP89705.1, BAJ85167.1, CAA74160.1
5	GO:0044271	cellular nitrogen compound biosynthetic process	Biological Process	GO:0034641, GO:0044249	cellular nitrogen compound metabolic process, cellular biosynthetic process	0.86	4	BAJ91711.1, BAJ90670.1, BAK04470.1, BAJ93929.1
5	GO:0006518	peptide metabolic process	Biological Process	GO:1901564, GO:0043603	organonitrogen compound metabolic process, cellular amide metabolic process	1.44	4	BAJ91711.1, BAJ90670.1, BAK04470.1, BAJ93929.1
5	GO:0043603	cellular amide metabolic process	Biological Process	GO:0034641	cellular nitrogen compound metabolic process	0.86	4	BAJ91711.1, BAJ90670.1, BAK04470.1, BAJ93929.1
5	GO:0044267	cellular protein metabolic process	Biological Process	GO:0044260, GO:0019538	cellular macromolecule metabolic process, protein metabolic process	2.4	4	BAJ91711.1, BAJ90670.1, BAK04470.1, BAJ93929.1
5	GO:0009059	macromolecule biosynthetic process	Biological Process	GO:0043170, GO:1901576	macromolecule metabolic process, organic substance biosynthetic process	1.44	4	BAJ91711.1, BAJ90670.1, BAK04470.1, BAJ93929.1
5	GO:0010467	gene expression	Biological Process	GO:0043170	macromolecule metabolic process	2.4	4	BAJ91711.1, BAJ90670.1, BAK04470.1, BAJ93929.1
5	GO:0034645	cellular macromolecule biosynthetic process	Biological Process	GO:0044260, GO:0009059, GO:0044249	cellular macromolecule metabolic process, macromolecule biosynthetic process, cellular biosynthetic process	2.4	4	BAJ91711.1, BAJ90670.1, BAK04470.1, BAJ93929.1
5	GO:1901566	organonitrogen compound biosynthetic process	Biological Process	GO:1901564, GO:1901576	organonitrogen compound metabolic process, organic substance biosynthetic process	1.44	4	BAJ91711.1, BAJ90670.1, BAK04470.1, BAJ93929.1
6	GO:0043043	peptide biosynthetic process	Biological Process	GO:0043604, GO:0006518, GO:1901566	amide biosynthetic process, peptide metabolic process, organonitrogen compound biosynthetic process	2.4	4	BAJ91711.1, BAJ90670.1, BAK04470.1, BAJ93929.1
6	GO:0043604	amide biosynthetic process	Biological Process	GO:0044271, GO:0043603	cellular nitrogen compound biosynthetic process, cellular amide metabolic process	1.44	4	BAJ91711.1, BAJ90670.1, BAK04470.1, BAJ93929.1
6	GO:0006412	translation	Biological Process	GO:0043043, GO:0010467, GO:0034645, GO:0044267	peptide biosynthetic process, gene expression, cellular macromolecule biosynthetic process, cellular protein metabolic process	4	4	BAJ91711.1, BAJ90670.1, BAK04470.1, BAJ93929.1

## Sheet: Datasheet 5C_GO_CC
Data sheet 5C. Gene ontology annotation of differentialy regulated proteins found between mock treated and flg22 treated Hv MPK3 KO barley roots according to cellular compartment.
Level	GO ID	GO Name	GO Type	Parents (ACC)	Parents (Name)	Nodescore	#Seqs	Sequence Names
1	GO:0005575	cellular_component	Cellular Component			10.41	22	BAK06600.1, CBV16324.1, CAJ01704.1, BAK04470.1, BAJ94855.1, BAJ96616.1, BAK01044.1, BAJ87507.1, CBC42618.1, BAK02785.1, BAJ88342.1, BAJ94473.1, BAJ92810.1, BAJ85560.1, BAJ91711.1, BAJ96699.1, AGH62455.1, BAJ90670.1, BAJ93929.1, BAJ98220.1, BAJ85914.1, BAJ99125.1
2	GO:0110165	cellular anatomical entity	Cellular Component	GO:0005575	cellular_component	17.35	22	BAK06600.1, CBV16324.1, CAJ01704.1, BAK04470.1, BAJ94855.1, BAJ96616.1, BAK01044.1, BAJ87507.1, CBC42618.1, BAK02785.1, BAJ88342.1, BAJ94473.1, BAJ92810.1, BAJ91711.1, BAJ85560.1, BAJ96699.1, BAJ90670.1, AGH62455.1, BAJ93929.1, BAJ98220.1, BAJ85914.1, BAJ99125.1
3	GO:0005622	intracellular anatomical structure	Cellular Component	GO:0110165	cellular anatomical entity	15.38	20	BAK06600.1, CBV16324.1, CAJ01704.1, BAK04470.1, BAJ94855.1, BAJ96616.1, BAJ87507.1, CBC42618.1, BAK02785.1, BAJ94473.1, BAJ92810.1, BAJ91711.1, BAJ85560.1, BAJ96699.1, BAJ90670.1, AGH62455.1, BAJ93929.1, BAJ98220.1, BAJ85914.1, BAJ99125.1
3	GO:0043226	organelle	Cellular Component	GO:0110165	cellular anatomical entity	5.01	18	BAK06600.1, CBV16324.1, BAK04470.1, BAJ94855.1, BAJ96616.1, BAJ87507.1, CBC42618.1, BAK02785.1, BAJ94473.1, BAJ92810.1, BAJ91711.1, BAJ96699.1, BAJ90670.1, AGH62455.1, BAJ93929.1, BAJ98220.1, BAJ85914.1, BAJ99125.1
4	GO:0043229	intracellular organelle	Cellular Component	GO:0043226, GO:0005622	organelle, intracellular anatomical structure	8.35	18	BAK06600.1, CBV16324.1, BAK04470.1, BAJ94855.1, BAJ96616.1, BAJ87507.1, CBC42618.1, BAK02785.1, BAJ94473.1, BAJ92810.1, BAJ91711.1, BAJ96699.1, BAJ90670.1, AGH62455.1, BAJ93929.1, BAJ98220.1, BAJ85914.1, BAJ99125.1
3	GO:0005737	cytoplasm	Cellular Component	GO:0110165, GO:0005622	cellular anatomical entity, intracellular anatomical structure	20.32	13	BAK06600.1, CBV16324.1, CAJ01704.1, BAJ94855.1, BAJ96616.1, BAJ87507.1, CBC42618.1, BAJ94473.1, BAJ85560.1, BAJ96699.1, BAJ98220.1, BAJ85914.1, BAJ99125.1
4	GO:0043227	membrane-bounded organelle	Cellular Component	GO:0043226	organelle	6.19	12	BAK06600.1, CBV16324.1, BAJ94855.1, BAJ96616.1, BAJ87507.1, CBC42618.1, BAK02785.1, BAJ94473.1, BAJ92810.1, BAJ96699.1, BAJ98220.1, BAJ99125.1
5	GO:0043231	intracellular membrane-bounded organelle	Cellular Component	GO:0043229, GO:0043227	intracellular organelle, membrane-bounded organelle	10.32	12	BAK06600.1, CBV16324.1, BAJ94855.1, BAJ96616.1, BAJ87507.1, CBC42618.1, BAK02785.1, BAJ94473.1, BAJ92810.1, BAJ96699.1, BAJ98220.1, BAJ99125.1
4	GO:0043228	non-membrane-bounded organelle	Cellular Component	GO:0043226	organelle	2.16	6	BAJ91711.1, BAJ90670.1, AGH62455.1, BAK04470.1, BAJ93929.1, BAJ85914.1
5	GO:0043232	intracellular non-membrane-bounded organelle	Cellular Component	GO:0043228, GO:0043229	non-membrane-bounded organelle, intracellular organelle	3.6	6	BAJ91711.1, BAJ90670.1, AGH62455.1, BAK04470.1, BAJ93929.1, BAJ85914.1
6	GO:0005634	nucleus	Cellular Component	GO:0043231	intracellular membrane-bounded organelle	6	6	BAJ92810.1, CBV16324.1, BAJ96699.1, BAJ94855.1, BAJ96616.1, BAK02785.1
6	GO:0005840	ribosome	Cellular Component	GO:0043232	intracellular non-membrane-bounded organelle	4	4	BAJ91711.1, BAJ90670.1, BAK04470.1, BAJ93929.1
3	GO:0012505	endomembrane system	Cellular Component	GO:0110165	cellular anatomical entity	3	3	BAK06600.1, BAJ94473.1, BAJ99125.1
4	GO:0005794	Golgi apparatus	Cellular Component	GO:0012505, GO:0005737, GO:0043231	endomembrane system, cytoplasm, intracellular membrane-bounded organelle	3	3	BAK06600.1, BAJ94473.1, BAJ99125.1
4	GO:0005773	vacuole	Cellular Component	GO:0005737, GO:0043231	cytoplasm, intracellular membrane-bounded organelle	3	3	BAK06600.1, BAJ94473.1, CBC42618.1
3	GO:0016020	membrane	Cellular Component	GO:0110165	cellular anatomical entity	2.6	2	BAJ94473.1, BAJ99125.1
3	GO:0005576	extracellular region	Cellular Component	GO:0110165	cellular anatomical entity	2	2	BAJ88342.1, BAK01044.1
4	GO:0005783	endoplasmic reticulum	Cellular Component	GO:0012505, GO:0005737, GO:0043231	endomembrane system, cytoplasm, intracellular membrane-bounded organelle	2	2	BAK06600.1, BAJ94473.1
4	GO:0005739	mitochondrion	Cellular Component	GO:0005737, GO:0043231	cytoplasm, intracellular membrane-bounded organelle	2	2	BAJ94473.1, BAJ87507.1
4	GO:0009536	plastid	Cellular Component	GO:0005737, GO:0043231	cytoplasm, intracellular membrane-bounded organelle	1.2	2	BAJ94855.1, BAJ98220.1
5	GO:0009507	chloroplast	Cellular Component	GO:0009536	plastid	2	2	BAJ94855.1, BAJ98220.1
6	GO:0005856	cytoskeleton	Cellular Component	GO:0043232	intracellular non-membrane-bounded organelle	2	2	AGH62455.1, BAJ85914.1

## Sheet: Datasheet 5D_KEGG
Data sheet 5D. KEGG pathway analysis of differentialy regulated proteins found between mock treated and flg22 treated HvMPK3 KO roots.
Pathway	Pathway ID	#Enzs in Pathway	Enzyme	#Seqs of Enzyme	Seqs
Sulfur metabolism	map00920	2	ec:3.1.3.7 - nucleotidase, ec:2.5.1.47 - synthase	1, 1	BAJ85167.1, CBL76026.1
Thiamine metabolism	map00730	2	ec:3.6.1.15 - phosphatase, ec:3.1.3.2 - phosphatase	1, 1	BAK01386.1, BAK02316.1
Cysteine and methionine metabolism	map00270	2	ec:2.5.1.47 - synthase, ec:2.5.1.6 - adenosyltransferase	1, 1	CBL76026.1, CAJ01704.1
Arginine biosynthesis	map00220	2	ec:2.6.1.2 - transaminase, ec:3.5.1.14 - acid amidohydrolase	1, 1	pdb|3TCM|B, BAK06600.1
Alanine, aspartate and glutamate metabolism	map00250	2	ec:2.6.1.2 - transaminase, ec:2.6.1.12 - transaminase	1, 1	pdb|3TCM|B, pdb|3TCM|B
Pentose phosphate pathway	map00030	2	ec:1.1.1.49 - dehydrogenase (NADP+), ec:2.7.1.15 - deoxyribokinase	1, 1	AZP89705.1, BAJ94855.1
Glycolysis / Gluconeogenesis	map00010	1	ec:1.2.4.1 - dehydrogenase (acetyl-transferring)	1	BAJ93316.1
Phenylpropanoid biosynthesis	map00940	1	ec:1.11.1.7 - lactoperoxidase	1	BAJ88342.1
C5-Branched dibasic acid metabolism	map00660	1	ec:1.1.1.85 - dehydrogenase	1	BAJ91934.1
Glutathione metabolism	map00480	1	ec:1.1.1.49 - dehydrogenase (NADP+)	1	AZP89705.1
Pyruvate metabolism	map00620	1	ec:1.2.4.1 - dehydrogenase (acetyl-transferring)	1	BAJ93316.1
Riboflavin metabolism	map00740	1	ec:3.1.3.2 - phosphatase	1	BAK02316.1
Purine metabolism	map00230	1	ec:3.6.1.15 - phosphatase	1	BAK01386.1
Vitamin B6 metabolism	map00750	1	ec:2.7.1.35 - kinase	1	BAK00937.1
Valine, leucine and isoleucine biosynthesis	map00290	1	ec:1.1.1.85 - dehydrogenase	1	BAJ91934.1
Carbon fixation in photosynthetic organisms	map00710	1	ec:2.6.1.2 - transaminase	1	pdb|3TCM|B
Arachidonic acid metabolism	map00590	1	ec:5.3.99.3 - synthase	1	BAK04530.1
Valine, leucine and isoleucine degradation	map00280	1	ec:1.2.1.27 - dehydrogenase (CoA-acylating)	1	BAJ94980.1
Citrate cycle (TCA cycle)	map00020	1	ec:1.2.4.1 - dehydrogenase (acetyl-transferring)	1	BAJ93316.1
Propanoate metabolism	map00640	1	ec:1.2.1.27 - dehydrogenase (CoA-acylating)	1	BAJ94980.1
Arginine and proline metabolism	map00330	1	ec:3.5.1.53 - amidase	1	BAJ93919.1

## Sheet: Datasheet 5E_Protein domains
Data sheet 5E. Interpro protein domains identified in differentialy regulated proteins found between mock treated and flg22 treated HvMPK3 KO roots.
IPS Domain	#Seqs
(IPR004839) Aminotransferase, class I/classII	3	BAK07780.1, pdb|3TCM|B, BAJ97930.1
(IPR001926) Pyridoxal-phosphate dependent enzyme	2	BAJ90077.1, CBL76026.1
(IPR001024) PLAT/LH2 domain	2	BAJ97172.1, AAB70865.1
(IPR004045) Glutathione S-transferase, N-terminal	2	ALH06519.1, BAK04530.1
(IPR000504) RNA recognition motif domain	2	BAJ99185.1, BAK04168.1
(IPR005818) Linker histone H1/H5, domain H15	1	BAJ92810.1
(IPR005475) Transketolase-like, pyrimidine-binding domain	1	BAJ93316.1
(IPR022674) Glucose-6-phosphate dehydrogenase, NAD-binding	1	AZP89705.1
(IPR040974) Purple acid phosphatase, Fn3-like domain	1	BAK02316.1
(IPR011611) Carbohydrate kinase PfkB	1	BAJ94855.1
(IPR006861) Hyaluronan/mRNA-binding protein	1	BAJ96699.1
(IPR000668) Peptidase C1A, papain C-terminal	1	CBC42618.1
(IPR002109) Glutaredoxin	1	BAK04530.1
(IPR001251) CRAL-TRIO lipid binding domain	1	BAK04984.1
(IPR022629) S-adenosylmethionine synthetase, central domain	1	CAJ01704.1
(IPR032799) Xylanase inhibitor, C-terminal	1	BAJ94733.1
(IPR015590) Aldehyde dehydrogenase domain	1	BAJ94980.1
(IPR022617) Rad60/SUMO-like domain	1	BAK02785.1
(IPR012891) GCK	1	BAJ84842.1
(IPR033121) Peptidase family A1 domain	1	BAJ94733.1
(IPR033868) Xylanase inhibitor I-like	1	BAJ94733.1
(IPR039417) Papain-like cysteine endopeptidase	1	CBC42618.1
(IPR033720) Elongation factor Tu, domain 2	1	BAK01386.1
(IPR033905) Secretory peroxidase	1	BAJ88342.1
(IPR022628) S-adenosylmethionine synthetase, N-terminal	1	CAJ01704.1
(IPR017986) WD40-repeat-containing domain	1	BAJ85560.1
(IPR001662) Elongation factor 1B gamma, C-terminal	1	ALH06519.1
(IPR024298) Ancestral coatomer element 1, Sec16/Sec31	1	BAJ85560.1
(IPR003128) Villin headpiece	1	BAK02464.1
(IPR016140) Bifunctional inhibitor/plant lipid transfer protein/seed storage helical domain	1	BAJ88730.1
(IPR000426) Proteasome alpha-subunit, N-terminal domain	1	CBV16324.1
(IPR002108) Actin-depolymerising factor homology domain	1	AGH62455.1
(IPR004161) Translation elongation factor EFTu-like, domain 2	1	BAK01386.1
(IPR034168) Peptidyl-prolyl cis-trans isomerase E, RNA recognition motif	1	BAK04168.1
(IPR039556) ICL/PEPM domain	1	BAJ86154.1
(IPR019181) Anticodon-binding domain	1	BAJ87775.1
(IPR013819) Lipoxygenase, C-terminal	1	AAB70865.1
(IPR007123) Gelsolin-like domain	1	BAK02464.1
(IPR004843) Calcineurin-like phosphoesterase domain, ApaH type	1	BAK02316.1
(IPR010987) Glutathione S-transferase, C-terminal-like	1	ALH06519.1
(IPR000626) Ubiquitin-like domain	1	BAK02785.1
(IPR022675) Glucose-6-phosphate dehydrogenase, C-terminal	1	AZP89705.1
(IPR011074) CRAL/TRIO, N-terminal domain	1	BAK04984.1
(IPR041988) Ribosomal protein L26/L24, KOW domain	1	BAK04470.1
(IPR011650) Peptidase M20, dimerisation domain	1	BAK06600.1
(IPR004046) Glutathione S-transferase, C-terminal	1	ALH06519.1
(IPR032154) Coatomer subunit gamma, C-terminal	1	BAJ99125.1
(IPR015914) Purple acid phosphatase, N-terminal	1	BAK02316.1
(IPR032861) Xylanase inhibitor, N-terminal	1	BAJ94733.1
(IPR034335) Prostaglandin E synthase 2, C-terminal	1	BAK04530.1
(IPR005824) KOW	1	BAK04470.1
(IPR033248) Transketolase, C-terminal domain	1	BAJ93316.1
(IPR022630) S-adenosylmethionine synthetase, C-terminal	1	CAJ01704.1
(IPR042057) Plant lipoxygenase, PLAT/LH2 domain	1	AAB70865.1
(IPR004160) Translation elongation factor EFTu/EF1A, C-terminal	1	BAK01386.1
(IPR016180) Ribosomal protein L10e/L16	1	BAJ91711.1
(IPR009038) GOLD domain	1	BAK04984.1
(IPR013040) Coatomer, gamma subunit, appendage, Ig-like subdomain	1	BAJ99125.1
(IPR014044) CAP domain	1	BAK01044.1
(IPR000795) Translational (tr)-type GTP-binding domain	1	BAK01386.1
(IPR020683) Ankyrin repeat-containing domain	1	BAJ91053.1
(IPR019084) Stm1-like, N-terminal	1	BAJ96699.1
(IPR041233) Alpha galactosidase, C-terminal beta sandwich domain	1	CAA74160.1
(IPR002553) Clathrin/coatomer adaptor, adaptin-like, N-terminal	1	BAJ99125.1
(IPR003010) Carbon-nitrogen hydrolase	1	BAJ93919.1
(IPR024084) Isopropylmalate dehydrogenase-like domain	1	BAJ91934.1
(IPR013201) Cathepsin propeptide inhibitor domain (I29)	1	CBC42618.1
(IPR005225) Small GTP-binding protein domain	1	BAK01386.1
(IPR002016) Haem peroxidase	1	BAJ88342.1
(IPR013749) Pyridoxamine kinase/Phosphomethylpyrimidine kinase	1	BAK00937.1
(IPR025733) Iron/zinc purple acid phosphatase-like C-terminal domain	1	BAK02316.1
(IPR034349) NUCL, RNA recognition motif 1	1	BAJ99185.1
(IPR041709) Elongation factor Tu (EF-Tu), GTP-binding domain	1	BAK01386.1
(IPR041792) Purple acid phosphatase, metallophosphatase domain	1	BAK02316.1
