# Supplementary material for: TALEN-Based HvMPK3 Knock-Out Attenuates Proteome and Root Hair Phenotypic Responses to flg22 in Barley
Source: Front Plant Sci. 2021 Apr 29;12:666229. doi: 10.3389/fpls.2021.666229 (PMC8117018; doi:10.3389/fpls.2021.666229)
Supplement: Supplementary Data Sheet 6 — Prediction of MAPK-specific phosphorylation sites and docking motifs in amino acid sequences of differentially abundant proteins found in flg22-treated wild type and HvMPK3 KO mutant roots. [file Data_Sheet_6.xlsx]

## Sheet: Data sheet 6A (WT)
	Data sheet 6A. Prediction of MAPK-specific phosphorylation sites and docking motifs in aminoacid sequences of differentially regulated proteins found between mock treated and flg22 treated barley wild type roots.
	Accesion number	Protein name	Phosphopeptide sequences	Docking sequence	Position	Fold change
	BAJ99688.1	Cytochrome b5 (Oryza sativa subsp. japonica OX=39947)"				1.86436
			PHYNQDKTPEFIIKI
	BAJ98400.1	Probable aldo-keto reductase 1 (Glycine max OX=3847)"				3.53985
			YSWRVANTPPQM***
			GIGVVPYSPLARGFF
			RDIEEDITPLCRELG
			LSTKYGCTPAQLALA
			GGLCVKGTPEYVRAC
	BAJ87483.1	Aldehyde dehydrogenase family 7 member A1 (Malus domestica OX=3750)"				2.33206
			VWKGAPTTPLITIAM	FNFP	165-168 [A]
			QPTIVEISPDAPVVR	RFGKCLLEL	260-268 [A]
	BAK05254.1	GLY3 Persulfide dioxygenase ETHE1 homolog, mitochondrial (Arabidopsis thaliana OX=3702)"				2.48539
			CCAPRPISPPPALAM
			QLAAAARSPSAPKVA
			GDSDGQPSPRMAFTG
			LFLEVRATPGHTAGC
	AFP72240.1	sucrose:fructan 6-fructosyltransferase				0.639328
			VEVQCIATPADPNDP
			DSAANTWTPIDPELD
			PANPVIWSPPGVGTK
	BAK03413.1	tal1 Transaldolase 1 (Streptomyces avermitilis (strain ATCC 31267 / DSM 46492 / JCM 5070 / NBRC 14893 / NCIMB 12804 / NRRL 8165 / MA-4680) OX=227882)"				0.600661
			GYVSVEVSPRLANDT	RRFRVSL	36-42 [A]
			KMLEKIGTPEALALR
			SLAGRARSPVIAMAS
			LYEQQGQSPWYDNLC
	BAJ95309.1	At3g26720 Alpha-mannosidase At3g26720 (Arabidopsis thaliana OX=3702)"				1.81767
			YFEVDATSPVVQDDP
			TFGQELYSPLLLAFA
			GSNSRCSSPTTKFGQ
			RVNALYSTPSIYTDA
			VKAYLGTSPAAKPKF
	BAK04892.1	Citrate synthase, glyoxysomal (Cucurbita maxima OX=3661)"				0.152479
			AAASLERSPVSAASP	RTGKRYEVKV	56-65 [A]
			RSPVSAASPGTRAGV	KRYEVKV	59-65 [A]
			GVWLRHYTPVRERVT
	sp|P52711.1|CBP23	Serine carboxypeptidase II-3				2.18
			CQSEKLVTPPIAPSI
			ANVLFLESPAGVGYS
			HAILRHASPDINLKG
			YLNRLRGSPSSRASW
	CBV16322.1	PAF1 Proteasome subunit alpha type-1 (Oryza sativa subsp. japonica OX=39947)"				2.75685
			DTDVTTWSPQGRLFQ	RSWKRPYGVGL	122-132 [A]
			FEKFNAYTPDELIKD	KRPYGVGL	125-132 [A]
	BAJ99666.1	OOP Organellar oligopeptidase A, chloroplastic/mitochondrial (Arabidopsis thaliana OX=3702)"				0.442561
			LFLAAAMTPTLLTSA	FDFP	105-108 [A]
			LSLLPASSPLRAFCP	KVKFYLRL	188-195 [A]
			RRLSRNPSPLPARIL	KRGGAWMNV	517-525 [A]
			LALGGGKSPLEVFVA	RRFRETVLAL	747-756 [A]
			AFRGREPSPEPLLRH	RFRETVLAL	748-756 [A]
			CVKDSSNSPVAYFYF
			HLKAVKDSPDLRSAV
	BAK08031.1	RPT3 26S proteasome regulatory subunit 6B homolog (Arabidopsis thaliana OX=3702)"				0.215383
			SAAAVAPSPPAAPPS	RRQKRLVF	330-337 [A]
				RKNRYVIL	380-387 [A]
	CBM38599.1	Pyrroline-5-carboxylate reductase (Glycine max OX=3847)"				2.26855
			IIRVMPNTPSAVGQA
			QLKDQVTSPAGTTIA
	BAK02323.1	PHOS34 Universal stress protein PHOS34 (Arabidopsis thaliana OX=3702)"				0.279926
			WGSVTPTSPEDDAEV
			PASLQPDSPGVFFTN
			PPRVKAPTPRPPPPA
			GADWGSVTPTSPEDD
			CPVVVVRTPDDAVAE
	BAK01268.1	Phosphomannomutase (Triticum aestivum OX=4565)"				0.435076
			TVGHTVTSPNDTVQQ	KRLRENVTVGV	36-46 [A]
			TAPRKEVTPEMLDFM	RLRENVTVGV	37-46 [A]
			RSGMINVSPIGRNCS	KRGTFIEF	118-125 [A]
				REKFAHLNL	165-173 [A]
	BAK05687.1	ABCF4 ABC transporter F family member 4 (Arabidopsis thaliana OX=3702)"				1.46834
			FPEPTLLTPPLLQLI	FHFP	469-472 [A]
			NLLAGDLTPAEGEAR	FSYP	489-492 [A]
			LPGHNHLTPIVKLSG	KPARATVDL	84-92 [A]
				RDDRDAFSVVI	125-135 [A]
	BAJ85477.1	VHA-D V-type proton ATPase subunit D (Arabidopsis thaliana OX=3702)"				0.331156
			VDPAGASSPSLTGLA
				KKKSDALTV	35-43 [A]
				KKSDALTV	36-43 [A]
	BAK02478.1	RPS16A 40S ribosomal protein S16 (Oryza sativa subsp. japonica OX=39947)"				Unique in mock treated
			AAVLTRPTPGTVQCF	RKKTAVAV	18-25 [A]
				KKTAVAV	19-25 [A]
				KPGRGLIKV	29-37 [A]
				RLKAFEPIML	51-60 [A]
				RFKDIDMRI	65-73 [A]
	BAJ85374.1	CP31A 31 kDa ribonucleoprotein, chloroplastic (Arabidopsis thaliana OX=3702)"				1.74797
			KPFLVLLSPALPRRL	RRLGLGL	41-47 [A]
			LRALAGASPAPLPKP
	BAJ97809.1	EIF4B Eukaryotic translation initiation factor 4B1 (Triticum aestivum OX=4565)"				Unique in flg
			AHSSRPGSPGSQVSA	KKKKGTTLSL	58-67 [A]
			PAEPKGLTPQEMMML	KKKGTTLSL	59-67 [A]
			WGKNKSFSPAPTDSG	KKGTTLSL	60-67 [A]
			TGGGFRESPGGGFRE	KGKDWRKIDL	382-391 [A]
			RDRLSGASPLGRSDD	KDWRKIDLEL	384-393 [A]
			SGGGFRDSPGPSDSD	RKIDLEL	387-393 [A]
			EVTRSRPSPFGAAKP	KNLKEEINL	407-415 [A]
	BAJ99755.1	eif3g Eukaryotic translation initiation factor 3 subunit G (Danio rerio OX=7955)"				2.35106
			PPTDASDTPPTSDGP
			ASDTPPTSDGPAALG
	BAJ93264.1	CPN20 20 kDa chaperonin, chloroplastic (Arabidopsis thaliana OX=3702)"				1.48882
			VRAATVVSPKYTSVK	RRLRGLVV	40-47 [A]
			SRTPLSITPGSSVLY
			LGDDGSRTPLSITPG
	BAJ88210.1	At3g13860 Chaperonin CPN60-like 2, mitochondrial (Arabidopsis thaliana OX=3702)"				0.41203
			VIERPNRSPKVTKDG	KVTKDGVTV	86-94 [A]
			SKAWMIDSPDEINQV	KHRAGLKI	304-311 [A]
			KLTRGYISPYFVTDQ	KKVTVSL	359-365 [A]
				RLSKLSGGVAV	406-416 [A]
	BAJ95568.1	Os03g0255100 Beta-galactosidase 6 (Oryza sativa subsp. japonica OX=39947)"				0.43475
			SSLISLTTPVTLVTG	KAKDGGLDV	67-75 [A]
			IKFASFGTPSGTCGS	KLQRSGPALRL	765-775 [A]
			GFYCDQFTPSLPSRP
			LYNPSEASPEWVSDN
			SIHYPRSTPDMWPGL
	BAK02557.1	PER15 Peroxidase 15 (Arabidopsis thaliana OX=3702)"				0.61847
			MVNMGNITPLTGSQG	KFKRLGLNV	71-79 [A]
				KRLGLNV	73-79 [A]
	CAQ00106.1	papain-like cysteine proteinase [Hordeum vulgare subsp. vulgare]				1.51524
			KPAPTPPSPPTPPPP
			PTPPSPPTPPPPVAP
			NPPKPAPTPPSPPTP
			AEHGGGSSPNANSIA
	BAK08045.1	CDC48 Cell division cycle protein 48 homolog (Glycine max OX=3847)"				1.61243
			***MAAPTPQGEASS	RKKSPNRLVV	28-37 [A]
			KFEKFGMSPSKGVLF	KKSPNRLVV	29-37 [A]
			FKACLRKSPLAKDID	KTVRKNLRVRL	95-105 [A]
			AILERKKSPNRLVVD	RKNLRVRL	98-105 [A]
				RVRLGDVVSV	102-111 [A]
				RPLRKGDLFL	153-162 [A]
				RKGDLFL	156-162 [A]
				KSRAHVIV	344-351 [A]
				RRFGRFDREIDI	366-377 [A]
				RFGRFDREIDI	367-377 [A]
				RFDREIDIGV	370-379 [A]
				KNMKLAEDVEL	394-404 [A]
				REKMDIIDL	432-440 [A]
	BAJ94317.1	BXL6 Probable beta-D-xylosidase 6 (Arabidopsis thaliana OX=3702)"				1.75823
			QRISLSHSPVPGLIS	RARALVSL	50-57 [A]
			RWGRGQETPGEDPAM	KRSKVSHIAL	409-418 [A]
			CKDVSCDSPDGFGEA	RSKVSHIAL	410-418 [A]
				KRADIVVVI	479-487 [A]
				KKPIVLVI	522-529 [A]
	BAJ95922.1	Chitinase 2 (Tulipa saxatilis subsp. bakeri OX=110455)"				1.88021
			TEELGLLSPDQGIAA
			VAQKPTPTPTNGAFS
			TPVAQKPTPTPTNGA
			LAFAIDYTPVAQKPT
	BAJ89039.1	23 kDa jasmonate-induced protein (Hordeum vulgare OX=4513)"				2.33283
			WIGSIFDTPYPSDIQ	KIKYGNGISV	55-64 [A]
	CAC88339.1	AOC Allene oxide cyclase, chloroplastic (Oryza sativa subsp. japonica OX=39947)"				Unique in mock treated
			LCTPVPPSPTVEPTP	RPSKVQELHV	62-71 [A]
			LPKELLCTPVPPSPT
			PVRASLFSPKPAVAM
			LNERDRESPAYLRLS
			ASVSAKLTPWRAARA
			PSPTVEPTPAAKATE
	BAJ97491.1	BTR1 Protein BTR1 (Arabidopsis thaliana OX=3702)"				1.76196
			**MEAPGSPYASSPD
			YQNNKPGTPVRSPAN
			KPGTPVRSPANNDAQ
			PKRAPRSSPPPPQDR
			PGSPYASSPDTAPKR
			SHAGIKISPQDNNFV
			HYPPNLSSPFPYAGL
	CBL76028.1	CYS1 Cysteine synthase (Triticum aestivum OX=4565)"				0.667125
			**MGEASTPAIARDV	KKEAESMVV	316-324 [A]
			AEELAAKTPNSYILQ
			VTELIGNTPLVYLNK
	BAJ95421.1	IIL1 3-isopropylmalate dehydratase large subunit, chloroplastic (Arabidopsis thaliana OX=3702)"				2.7686
			AGCDTPASPNCGACL	KDVKIDRVYI	366-375 [A]
			TPTRAPRSPASTGSV
			FEEAGCDTPASPNCG
			ASTGSVKSPMTTTEK
			EGQIYLASPFTAAAS
			PVVAKPHSPDNRALA
			GRVRAVATPTRAPRS
	BAJ90564.1	AGD2 Probable LL-diaminopimelate aminotransferase, chloroplastic (Oryza sativa subsp. japonica OX=39947)"				0.452003
			**MATTASPSTTTTP	RTTRRLPVNV	33-42 [A]
			ASPSTTTTPRSFLSS	RRLPVNV	36-42 [A]
			TPRSFLSSPSFSLRA
			EKAHVVTTPGSGFGP
			TDIIFFCSPNNPTGA
			NVRCASSSPAADASY
			AMYISDDSPKSIFEI
			NIEYMRCSPENGFFP
	BAJ95255.1	At4g02580 NADH dehydrogenase [ubiquinone] flavoprotein 2, mitochondrial (Arabidopsis thaliana OX=3702)"				0.527723
			AARRLSPSPISSSAA	KVGKYHLLV	143-151 [A]
			QPAARRLSPSPISSS
			HLLVCGTTPCMIRGS
			YNYYEDLTPKRVVEL
			EMLRRGETPPRGTQN
			ALNYHIDSPDNNPNM
	BAK03012.1	ABT ADP,ATP carrier protein (Chlamydomonas reinhardtii OX=3055)"				0.642908
			IKQGRLSTPYKGIVD
	BAK02740.1	HIT4 Protein HEAT INTOLERANT 4 (Arabidopsis thaliana OX=3702)"				2.82682
			MPYYMPLSPPEDEDD
			YPVKTDDTPDVSQVQ
	BAK01860.1	AIP1-2 Actin-interacting protein 1-2 (Arabidopsis thaliana OX=3702)"				Unique in mock treated
			TITSSAISPDGTEAI
			LQETYACSPATERGR
			PTTVARFSPNGEWVA
			RVNCLAWSPDSRFVA
			PITTIHYSPDVSMFA
			SIYAVSWSPDSKQVL
			RVDDLRWSPDGMRIV
	BAJ95882.1	TCEA1 Tuliposide A-converting enzyme 1, chloroplastic (Tulipa gesneriana OX=13306)"				1.92911
			*MAAAAPTPAPAPAA
			ASRDRVISPEVSARL
			WRVMCPTTTGEDDPL
	BAJ94290.1	OST48 Dolichyl-diphosphooligosaccharide--protein glycosyltransferase 48 kDa subunit (Oryza sativa subsp. japonica OX=39947)"				4.13917
			LVLFAPSTPRFGGSV	RGRKLLVLV	30-38 [A]
			QIQFFMMSPYVLKNM	RKLLVLV	32-38 [A]
			VLKVLSASPSAYSAN	KKIEAPVLF	177-185 [A]
			AVAEDAKTPEDAPLP	KKDAEEVFI	277-285 [A]
	BAJ96699.1	RGGB RGG repeats nuclear RNA binding protein B (Arabidopsis thaliana OX=3702)"				Unique in mock treated
			EAVNTEETPAVAEDA	REERAKKSLNI	300-310 [A]
			ASKQPAKTPPPADDA	RAKKSLNI	303-310 [A]
	BAJ87775.1	lsm12a Protein LSM12 homolog A (Danio rerio OX=7955)"				Unique in mock treated
			ERIGVGVTPEAQRLF	RGERRNVRV	49-57 [A]
			MKEVRVCSPYLPENV	RVKKVLDF	161-168 [A]
				RKRQHVRV	170-177 [A]
				KRQHVRV	171-177 [A]
	CBD25145.1	BTF3 Basic transcription factor 3 (Arabidopsis thaliana OX=3702)"				Unique in mock treated
			NTWVVSGTPQTKKLQ

## Sheet: Data sheet 6B (HvMPK3 KO)
	Data sheet 6B. Prediction of MAPK-specific phosphorylation sites and docking motifs in aminoacid sequences of differentially regulated proteins found between mock treated and flg22 treated HvMPK3 KO roots.
	Accesion number	Protein name	Phosphopeptide sequences	Docking sequence	Position	Fold change
	BAJ85560.1	SEC31B Protein transport protein SEC31 homolog B (Arabidopsis thaliana OX=3702)"				0.213577
			LSPAQPSSPTQAQPP	RTKLLVHLGF	459-468 [A]
			TNPNQMFTPAVPTNS
			GLEFSELTPNRLASG
			FVQRPGLSPAQPSSP
			TLGSQLYTPPANSSY
			TPVDSQPSPAPLPVP
			HQTVKTFTPANVPSL
			KLNTGDISPNVSSKL
			SLDFQSDSPDLPLLA
			QMFVPKSTPVDSQPS
			PLLAAAPSPDRFNRL
			LASDDDNSPSLRVWD
			QYLKNSISPYLKVVS
			LPNQHSYTPDPSQNI
	BAJ99125.1	Os07g0201100 Coatomer subunit gamma-2 (Oryza sativa subsp. japonica OX=39947)"				Unique in flg22
			GVTSRELTPAITVLQ	RRMVYLMI	88-95 [A]
			GIYLLQTSPEVVKRW	RNKAEMVIL	266-274 [A]
			LRSLPYDSPGQTFVA	KYRSLMNF	399-406 [A]
			LTRGSVRSPLAQCLL	KPRIFVLL	512-519 [A]
			GKLFKSSTPVELTEA	RDRATLYIKL	531-540 [A]
			LDEEEYYSPFLGIEK	KLFKSSTPVEL	640-650 [A]
			YLMIKELSPSADEVI
			KKSTGPSSTVNGPVP
	BAJ91053.1	AKR2A Ankyrin repeat domain-containing protein 2A (Arabidopsis thaliana OX=3702)"				Unique in mock treated
			LQNMDGKTPIDVAKL	RKECVDLLL	61-69 [A]
			AMDKNKNTPLHYAAG
	BAJ95640.1	VPS24-1 Vacuolar protein sorting-associated protein 24 homolog 1 (Arabidopsis thaliana OX=3702)"				3.0139
			NLLKPKPTPQQQLRE
	BAJ98074.1	Glucan endo-1,3-beta-glucosidase GI (Hordeum vulgare OX=4513)"				1.79215
			IDHVGGGTPKRPGAL
			GLFNPDKSPAYPIRF
	AAB70865.1	lipoxygenase 2 [Hordeum vulgare subsp. vulgare]				Unique in mock treated
			PVAIELSSPLIQGEL
			MAVEDASSPHKVRLL
			TAKSAVYTPQHAGVE
			IRTYVDLSPGEFDSF
			VYLGQHDTPAWTSDA
			LTEFPPKSTLDPSKY
	BAK01044.1	PRMS Pathogenesis-related protein PRMS (Zea mays OX=4577)"				0.213711
			AGVSAQNTPQDFVNL
	BAJ88342.1	PER1 Peroxidase 1 (Zea mays OX=4577)"				0.328374
			PSTTTQTTPITAPMD	RRDGSVSI	151-158 [A]
			TAPMDPGSPNVLDNN
			PIVDAGLSPAYAAQL
			NRIWNGNTPIVDAGL
			LRALCPSTTTQTTPI
			ALCPSTTTQTTPITA
	BAJ87507.1	MORF1 Multiple organellar RNA editing factor 1, mitochondrial (Arabidopsis thaliana OX=3702)"				4.40959
			PTASAAASPHRSPLL	KFRGLPGVVF	152-161 [A]
			QGNYQNSSPPQGNFQ
			KYENGVITPRPPPVQ
			AAASPHRSPLLAPFA
			YRGNYENSPPSQGNY
	BAJ99185.1	Os04g0620700 Nucleolin 2 (Oryza sativa subsp. japonica OX=39947)"				2.10211
			PKQSEPKTPASSGQA
			PPRQSAGTPSAGKKI
			ARERGAITPGSGRDN
	BAK01386.1	TUFA Elongation factor Tu, mitochondrial (Arabidopsis thaliana OX=3702)"				0.61446
			GPQPPPPSPLAAGLW	RTKPHVNV	62-69 [A]
			TAFFSNYSPQFYFRT
	ALH06519.1	eukaryotic elongation factor 1 gamma [Hordeum vulgare]				1.51956
			GKVPVLETPDGAVFE
			EMGVSNKTPEFIKMN
	BAJ84945.1	HSP70-7 Heat shock 70 kDa protein 7, chloroplastic (Arabidopsis thaliana OX=3702)"				0.471979
			DIVLLDVTPLSLGLE	KKQDITI	174-180 [A]
			QQQGSGPTPGAGADG
	BAK04168.1	Ppie Peptidyl-prolyl cis-trans isomerase E (Mus musculus OX=10090)"				2.15947
			GEVKDVKTPLDQATQ	FCFP	13-16 [A]
				KHRSFGFVTF	77-86 [A]
	BAJ88559.1	Heat shock 70 kDa protein, mitochondrial (Phaseolus vulgaris OX=3885)"				0.618196
			SSSSSSSSPTPTHRN	RRSAMAL	2-8 [A]
			NSDGTRTTPSVVAFS	KRSDNIDL	290-297 [A]
			SSSSSSPTPTHRNT*
			TTDGKQYSPSQIGAF
			DRCFGHHSPLTNVIQ
			KGERLVGTPAKRQAI
	pdb|3TCM|B Chain B		IFLTDGASPGVHLMM
	CBL76026.1	Cysteine synthase, chloroplastic/chromoplastic (Solanum tuberosum OX=4113)"				1.4681
			*MASWTPSPVAAAAQ	KGKVDIFI	237-244 [A]
			AEEKGLITPGKSVLV	KEKNPDVKV	261-269 [A]
			AVNAPAASPSWRRHA
			***MASWTPSPVAAA
			ATEILNKTPNSYMLE
			VTQLIGKTPMVYLNR
	BAJ97930.1	Os01g0760600 Aspartate aminotransferase, cytoplasmic (Oryza sativa subsp. japonica OX=39947)"				1.54137
			VRHLLPSSPRTSPPA
			LPSSPRTSPPAAAAA
			QPFPTMASPSVFAGI
			VAYNKDPSPVKVNLG
			KLIFGADSPAIQENR
	BAJ91934.1	IMDH2 3-isopropylmalate dehydrogenase 2, chloroplastic (Arabidopsis thaliana OX=3702)"				1.59797
			*MTQLQATPLRTLAL
			FRTGDIYSPGTTLVG
	BAJ90077.1	Threonine synthase, chloroplastic (Solanum tuberosum OX=4113)"				Unique in mock treated
			AATTHAPSPSLSSLL
			FGYATDETPELMPLS
	CAJ01704.1	SAM3 S-adenosylmethionine synthase 3 (Hordeum vulgare OX=4513)"				0.624932
			LVNIEQQSPDIAQGV
	BAK07780.1	ALAAT2 Alanine aminotransferase 2, mitochondrial (Arabidopsis thaliana OX=3702)"				2.75848
			MSTSAAGTPPVSLDT
			ILSSLIMSPPKVGDE
			ATRPAAPSPAPAAAP
			APALSRPSPSAPSAM
			IFLTDGASPAVHMMM
			SCDEAPTSTTTESG*
	AAA32952.1	dehydrin DHN5 [Hordeum vulgare subsp. vulgare]				0.645289
			VGTGTHDTPATGGTY
			TGTAAHGTPAGGGTY
			VGTGTHGTPATGGAY
			VGTGTHGTPATGGAY
			TGMGRHSTPATGGSY
	BAJ93919.1	CPA N-carbamoylputrescine amidase (Oryza sativa subsp. japonica OX=39947)"				0.501711
			**EGAFLSPPPHPHT	KKGANIVLI	101-109 [A]
				RMQKLAKELDV	141-151 [A]
				KLAKELDVVI	144-153 [A]
				KTKYATIGV	210-218 [A]
	BAK00937.1	PK Pyridoxal kinase (Arabidopsis thaliana OX=3702)"				Unique in flg22
			VPVASMLTPNQFEVE
	BAK02785.1	SUMO1 Small ubiquitin-related modifier 1 (Oryza sativa subsp. japonica OX=39947)"				2.59549
			RRLRGEQTPDELEME
	CBC42618.1	Thiol protease aleurain (Hordeum vulgare OX=4513)"				0.639175
			AVEKRVTSPLLEPSS
			DRGVNTFSPEGRLFQ
			QVMEEKVTPNNVDIA
			NVDIANVSPSYHLYT
			SPSYHLYTPAEVEAV
	BAJ84842.1	MIA40 Mitochondrial intermembrane space import and assembly protein 40 (Kluyveromyces lactis (strain ATCC 8585 / CBS 2359 / DSM 70799 / NBRC 1267 / NRRL Y-1140 / WM37) OX=284590)"				1.59475
			ASGASPASPPPPAAE	KEKEDLAV	189-196 [A]
			EAAAPADSPAKEEAQ
			GVAASAASPPPEAAD
			ASEASGASPASPPPP
	AGH62455.1	actin depolymerization factor-like protein [Hordeum vulgare subsp. spontaneum]				2.37287
			SEDSAGDTPRSKIFF	KKELDGVQI	116-124 [A]
			KIFFIHWSPEAADSR
	BAK02464.1	VLN3 Villin-3 (Oryza sativa subsp. japonica OX=39947)"				Unique in mock treated
			KQKSAKTSPPRSRGT	RSRGTMAI	29-36 [A]
			PNGKDTASPPKLLWV							SEC31B Protein transport protein SEC31 homolog B (Arabidopsis thaliana OX=3702)"
			TKDGQTVTPTIQEDV							VLN3 Villin-3 (Oryza sativa subsp. japonica OX=39947)"
			EEEAKESTPATKDGQ
			MENLSRETPVYVINE
			IPKSIKASPEVKKPQ
			KSFSKSSSPDPVKPP
			QRRSTSFSPDRVRVR
			RVRVRGRSPAFNALA
			SNARNLSTPPPVARK
	BAJ85167.1	Os12g0183300 3'(2'),5'-bisphosphate nucleotidase (Oryza sativa subsp. japonica OX=39947)"				0.529683
			KEKKQASSPL*****	KADKTPVTV	43-51 [A]
			EEQSLDGSPPQKISV
			IQSKADKTPVTVADY
	BAJ94855.1	RBSK Ribokinase (Arabidopsis thaliana OX=3702)"				0.487767
			RLPLAGPTPATAFVS	KPKKECMRF	319-327 [A]
			LELVDIFSPNETELA	KKECMRF	321-327 [A]
			SFSLKPTSTSLAAAN
	BAJ92810.1	Histone H1 (Triticum aestivum OX=4565)"				1.75312				Os07g0201100 Coatomer subunit gamma-2 (Oryza sativa subsp. japonica OX=39947)"
			AKKTAAKSPAKKAAA							Os04g0620700 Nucleolin 2 (Oryza sativa subsp. japonica OX=39947)"
			KKAPAAATPKKPVAR							Heat shock 70 kDa protein, mitochondrial (Phaseolus vulgaris OX=3885)"
			KAPTKRATPVKKAAP							Cysteine synthase, chloroplastic/chromoplastic (Solanum tuberosum OX=4113)"
			AAKPKAKTPAKVKAV							dehydrin DHN5 [Hordeum vulgare subsp. vulgare]
			TADPVVDTPAAKPAK							Thiol protease aleurain (Hordeum vulgare OX=4513)"
	BAJ94980.1	ALDH6B2 Methylmalonate-semialdehyde dehydrogenase [acylating], mitochondrial (Arabidopsis thaliana OX=3702)"				2.03093				Histone H1 (Triticum aestivum OX=4565)"
			SASGLRRSPMAAPLS	FNFP	186-189 [A]					PAP1 Probable inactive purple acid phosphatase 1 (Arabidopsis thaliana OX=3702)"
			LAEGASSSPPRVRLL	KRASSLVV	339-346 [A]
			AFPGWRSTPVTARQR
			SPMAAPLSTAAASWL
	BAJ93636.1	RuBisCO large subunit-binding protein subunit alpha, chloroplastic (Pisum sativum OX=3888)"				0.658134
			VVLDEFGSPKVVNDG	KLRGILNV	311-318 [A]
			EIDRGYISPQFVTNS	RIAKLSGGVAV	413-423 [A]
	BAK02316.1	PAP1 Probable inactive purple acid phosphatase 1 (Arabidopsis thaliana OX=3702)"				Unique in mock treated
			PGASVDASPPLLGLQ	KPSKDDWIGV	91-100 [A]
			RRASAMESPPGTTMV	KTGKGSLRLQI	142-152 [A]
			QGQIQILSPAGTLTF
			GYSTKEATPFVEWGI
			DDWIGVFSPANFSDS
			GVDNCPSTTMAS***
			AMESPPGTTMVAALV
	BAJ94733.1	LOC109345795 Gamma conglutin 1 (Lupinus angustifolius OX=3871)"				0.44072
			LSKSLTYTPLLVNNV	RQRTPQVPV	48-56 [A]
			TSCVGKPSPGCLNDT	RFSRKFALCL	195-204 [A]
			LTGFRQRTPQVPVTA	RKFALCL	198-204 [A]
